# Supplementary material
Source: HighWire-hosted journal article supplement (doi:10.1101/rna.061432.117)
Supplement: Supplemental_Table_1.xlsx [file Supplemental_Table_1.xlsx]

## Sheet: A_Seq_KD_cassette_exons
			PSI
event_name	proposed_gname	proposed_gid	siCtrl-ev	siU35-ev	siU35-fl	siU35-QP	siU35-QR	siU35-QRdel	siU35-fl_rescue	siU35-QP_rescue	siU35-QR_rescue	siU35-QRdel_rescue	KD_increases_skipping	3'splice_site	nt_at_+1
chr1:103895866:103895937:+@chr1:103897419:103897829:+@chr1:103899179:103899382:+	AMY2B	ENSG00000197839	0.27	0.11	0.37	0.09	0.13	0.46	TRUE	FALSE	FALSE	TRUE	TRUE	ATTCTGCTGTTCTTCTTTAGAAG	A
chr1:114743602:114743754:-@chr1:114742085:114742135:-@chr1:114736922:114742005:-	TRIM33	ENSG00000197323	0.66	0.46	0.77	0.38	0.5	0.76	TRUE	FALSE	FALSE	TRUE	TRUE	GACTCTGGTATCCTTTTTAGATG	A
chr1:151897754:151897986:+@chr1:151898238:151898284:+@chr1:151898548:151898666:+	SNAPIN	ENSG00000143553	0.76	0.48	0.78	0.41	0.55	0.73	TRUE	FALSE	FALSE	TRUE	TRUE	GGCCTTGTACCTCTTTGCAGAGA	A
chr1:153446963:153447042:+@chr1:153448542:153448634:+@chr1:153448800:153448982:+	MTX1	ENSG00000173171	0.72	0.49	0.62	0.4	0.55	0.75	TRUE	FALSE	FALSE	TRUE	TRUE	CATGGATATTTCCTCCACAGAAG	A
chr1:153505903:153506131:-@chr1:153505123:153505207:-@chr1:153504708:153504774:-	CLK2	ENSG00000176444	0.53	0.9	0.48	0.75	0.72	0.61	TRUE	FALSE	FALSE	TRUE	FALSE	CCCCTGCCCCCCGACAGCAGCAC	C
chr1:153505903:153506131:-@chr1:153505123:153505210:-@chr1:153504708:153504774:-	CLK2	ENSG00000176444	0.72	0.96	0.72	0.91	0.84	0.78	TRUE	FALSE	FALSE	TRUE	FALSE	CCCCCCCTGCCCCCCGACAGCAG	C
chr1:153964023:153964153:+@chr1:153965457:153965537:+@chr1:153965623:153965781:+	DAP3	ENSG00000132676	0.84	0.68	0.87	0.43	0.7	0.92	TRUE	FALSE	FALSE	TRUE	TRUE	TTTTCTTTGCTTGCTTTTAGATA	A
chr1:15918816:15919002:+@chr1:15920411:15920470:+@chr1:15924399:15924627:+	PLEKHM2	ENSG00000116786	0.24	0.1	0.28	0.04	0.12	0.48	TRUE	FALSE	FALSE	TRUE	TRUE	TTTGTCCCTCGTTTTTGTAGATT	A
chr1:217419112:217419211:+@chr1:217433047:217433216:+@chr1:217450497:217450612:+	LYPLAL1	ENSG00000143353	0.88	0.77	0.94	0.64	0.55	0.91	TRUE	FALSE	FALSE	TRUE	TRUE	GGGGGGCGGTTGTTAAACAGATC	A
chr1:217419112:217419211:+@chr1:217433095:217433216:+@chr1:217450497:217450612:+	LYPLAL1	ENSG00000143353	0.83	0.71	0.91	0.52	0.4	0.87	TRUE	FALSE	FALSE	TRUE	TRUE	TCCAATGTATGGTTTGACAGATT	A
chr1:224552043:224552137:-@chr1:224550166:224550270:-@chr1:224541988:224542121:-	LIN9	ENSG00000183814	0.48	0.24	0.41	0.09	0.33	0.53	TRUE	FALSE	FALSE	TRUE	TRUE	TGAAAACATTTCTATCATAGCCT	C
chr1:233449731:233449906:-@chr1:233443707:233443964:-@chr1:233425969:233426053:-	ARID4B	ENSG00000054267	0.99	0.6	0.85	0.64	0.53	0.99	TRUE	FALSE	FALSE	TRUE	TRUE	AATTTTTTAAACCTTTCAAGAGA	A
chr1:233558492:233558716:+@chr1:233565180:233565272:+@chr1:233571646:233571716:+	RP11-382D8.3	ENSG00000218260	0.98	0.77	0.95	0.82	0.91	0.99	TRUE	FALSE	FALSE	TRUE	TRUE	ATGTTTCTCCTTTTTGACAGATT	A
chr1:28199058:28199147:-@chr1:28197382:28197449:-@chr1:28196418:28196476:-	EYA3	ENSG00000158161	0.2	0.08	0.3	0.02	0.07	0.35	TRUE	FALSE	FALSE	TRUE	TRUE	TATTTGTAATGATTTTCTAGACA	A
chr1:43836978:43837171:+@chr1:43840329:43840355:+@chr1:43841674:43841791:+	PTPRF	ENSG00000142949	0.03	0.22	0.02	0.14	0.09	0.01	TRUE	FALSE	FALSE	TRUE	FALSE	TCTCCCTCTCCCGCGGTCAGTGG	T
chr1:6767971:6768222:+@chr1:6802828:6802897:+@chr1:6807739:6807857:+	CAMTA1	ENSG00000171735	0.83	0.71	0.83	0.67	0.75	0.89	TRUE	FALSE	FALSE	TRUE	TRUE	TTTATTTTCTGTTTCCTTAGAGC	A
chr1:74948370:74948519:-@chr1:74945375:74945476:-@chr1:74945171:74945266:-	CRYZ	ENSG00000116791	0.94	0.52	0.75	0.39	0.37	0.81	TRUE	FALSE	FALSE	TRUE	TRUE	ATTTCTCTTTTATTATATAGAAG	A
chr10:100185382:100185519:-@chr10:100185019:100185161:-@chr10:100183730:100183838:-	HPS1	ENSG00000107521	0.8	0.69	0.82	0.72	0.76	0.83	TRUE	FALSE	FALSE	TRUE	TRUE	TGGCCTGCCTGTGCCTGCAGTTT	T
chr10:5850182:5850353:-@chr10:5848463:5848607:-@chr10:5848210:5848264:-	GDI2	ENSG00000057608	0.82	0.69	0.79	0.47	0.68	0.88	TRUE	FALSE	FALSE	TRUE	TRUE	CTGGTATCATTTGTTTCTAGATA	A
chr10:70185133:70185299:+@chr10:70186036:70186246:+@chr10:70187057:70187140:+	CCAR1	ENSG00000060339	0.84	0.99	0.91	0.99	0.92	0.89	TRUE	FALSE	FALSE	TRUE	FALSE	TGCTTCTTCCCTTGCAACAGGTA	G
chr11:116738330:116738464:+@chr11:116739355:116739432:+@chr11:116747006:116747392:+	CEP164	ENSG00000110274	0.72	0.27	0.5	0.16	0.25	0.76	TRUE	FALSE	FALSE	TRUE	TRUE	GTCATCATTTTTGTTTCTAGAGT	A
chr11:3348781:3348876:-@chr11:3339549:3339695:-@chr11:3335733:3338371:-	ZNF195	ENSG00000005801	0.26	0.1	0.2	0.09	0.11	0.31	TRUE	FALSE	FALSE	TRUE	TRUE	tttttttgtattttctgtagaga	a
chr11:34434788:34434940:+@chr11:34435899:34435970:+@chr11:34439374:34439512:+	CAT	ENSG00000121691	0.19	0.06	0.23	0.04	0.02	0.31	TRUE	FALSE	FALSE	TRUE	TRUE	TCAATCTTTTGTGGTTTTAGACT	A
chr11:47194985:47195176:+@chr11:47210941:47211086:+@chr11:47212700:47212799:+	DDB2	ENSG00000134574	0.81	0.69	0.89	0.35	0.63	0.97	TRUE	FALSE	FALSE	TRUE	TRUE	TTTTTCCTTCCTCGTGTTAGATT	A
chr11:59180548:59180649:-@chr11:59180005:59180094:-@chr11:59179572:59179789:-	PATL1	ENSG00000166889	0.69	0.35	0.56	0.17	0.21	0.77	TRUE	FALSE	FALSE	TRUE	TRUE	tttttttttttttACCTTAGAAC	A
chr11:64646304:64646472:+@chr11:64648550:64648700:+@chr11:64649536:64649660:+	MRPL49	ENSG00000149792	0.94	0.78	0.89	0.64	0.79	0.97	TRUE	FALSE	FALSE	TRUE	TRUE	GGATTTTTGTTTTGCTTCAGAGC	A
chr11:8892949:8893053:+@chr11:8895410:8895490:+@chr11:8897460:8898202:+	C11orf17	ENSG00000166452	0.88	0.61	0.78	0.42	0.72	0.85	TRUE	FALSE	FALSE	TRUE	TRUE	TGTTCTACTTGTCTCTTCAGAGA	A
chr12:113603067:113603334:-@chr12:113602101:113602160:-@chr12:113601693:113601839:-	TBX3	ENSG00000135111	0.61	0.43	0.68	0.26	0.44	0.73	TRUE	FALSE	FALSE	TRUE	TRUE	GTTTTTCTCTATCTTTTAAGACT	A
chr12:119489011:119489166:+@chr12:119493377:119493477:+@chr12:119497817:119497874:+	RNF10	ENSG00000022840	0.81	0.55	0.73	0.54	0.55	0.75	TRUE	FALSE	FALSE	TRUE	TRUE	GGTCTCTGGTTCCCTTTCAGACT	A
chr12:27001801:27001943:+@chr12:27004715:27004828:+@chr12:27007542:27007655:+	FGFR1OP2	ENSG00000111790	0.74	0.35	0.56	0.2	0.18	0.64	TRUE	FALSE	FALSE	TRUE	TRUE	ATAATGACTCTATACTACAGATT	A
chr12:2845820:2845948:-@chr12:2844782:2844826:-@chr12:2844110:2844179:-	FOXM1	ENSG00000111206	0.31	0.57	0.43	0.48	0.74	0.38	TRUE	FALSE	FALSE	TRUE	FALSE	CAATGCCTGGCCGCCACCAGCCA	C
chr12:31133245:31133352:+@chr12:31133604:31133691:+@chr12:31134087:31134295:+	DDX11	ENSG00000013573	0.79	0.46	0.81	0.42	0.45	0.89	TRUE	FALSE	FALSE	TRUE	TRUE	TTCTTTCTCCTTTGCTGCAGAAC	A
chr12:48248098:48248178:-@chr12:48246772:48246891:-@chr12:48246127:48246265:-	MCRS1	ENSG00000187778	0.87	0.76	0.87	0.7	0.82	0.94	TRUE	FALSE	FALSE	TRUE	TRUE	GCCTCATTTCTCCTTTGCAGAAT	A
chr12:51983085:51983244:+@chr12:51985959:51986111:+@chr12:51986249:51986371:+	C12orf10	ENSG00000139637	0.98	0.74	0.95	0.67	0.83	0.9	TRUE	FALSE	FALSE	TRUE	TRUE	TTCCCCTGCTGCTGCCTTAGATG	A
chr12:55910853:55911050:+@chr12:55911531:55911610:+@chr12:55911763:55911963:+	SHMT2	ENSG00000182199	0.65	0.38	0.78	0.42	0.5	0.8	TRUE	FALSE	FALSE	TRUE	TRUE	ATTGCCCCCCACCACCCCAGAAC	A
chr12:6636154:6636225:-@chr12:6632657:6632823:-@chr12:6632363:6632477:-	ING4	ENSG00000111653	0.86	0.54	0.74	0.54	0.68	0.83	TRUE	FALSE	FALSE	TRUE	TRUE	GGCCTCTGTCTCTGTTGTAGACC	A
chr13:72253744:72254345:-@chr13:72253428:72253495:-@chr13:72252985:72253142:-	DIS3	ENSG00000083520	0.2	0.09	0.25	0.05	0.1	0.42	TRUE	FALSE	FALSE	TRUE	TRUE	TGGTGTCTCTTCTGCCTTAGATT	A
chr14:22445244:22445417:-@chr14:22444655:22444708:-@chr14:22444385:22444502:-	RBM23	ENSG00000100461	0.65	0.36	0.67	0.2	0.45	0.67	TRUE	FALSE	FALSE	TRUE	TRUE	TGTTTTTCTCTATTCTTTAGTTA	T
chr14:22494149:22494225:-@chr14:22491590:22491732:-@chr14:22491377:22491508:-	C14orf94	ENSG00000092036	0.83	0.97	0.83	0.98	0.88	0.8	TRUE	FALSE	FALSE	TRUE	FALSE	TGTGGGGACATGATGTTAAGTGT	T
chr14:22610476:22610610:-@chr14:22610174:22610235:-@chr14:22608525:22608666:-	ACIN1	ENSG00000100813	0.42	0.2	0.36	0.2	0.21	0.46	TRUE	FALSE	FALSE	TRUE	TRUE	tgttatttcttCCATTCCAGAAA	A
chr14:56805380:56805859:+@chr14:56810715:56811360:+@chr14:56816666:56816893:+	MUDENG	ENSG00000053770	0.85	0.73	0.88	0.41	0.64	0.97	TRUE	FALSE	FALSE	TRUE	TRUE	TTTCTGTTTCCGTAATGCAGACG	A
chr14:64460462:64460597:+@chr14:64462478:64462551:+@chr14:64468609:64471666:+	CHURC1	ENSG00000197195	0.86	0.68	0.87	0.44	0.69	0.86	TRUE	FALSE	FALSE	TRUE	TRUE	TAAGTCTCTCTTTGTTTTAGCAG	C
chr15:40638829:40638898:+@chr15:40640272:40640360:+@chr15:40640760:40640892:+	CEP27	ENSG00000137814	0.43	0.26	0.41	0.32	0.26	0.45	TRUE	FALSE	FALSE	TRUE	TRUE	ttttttcaatttttttgtagaga	a
chr15:41477528:41477669:+@chr15:41478602:41478664:+@chr15:41479534:41479711:+	TUBGCP4	ENSG00000137822	0.23	0.04	0.29	0.02	0.05	0.26	TRUE	FALSE	FALSE	TRUE	TRUE	CATTATGTTTGTTCCTTTAGAAA	A
chr15:41501345:41501616:-@chr15:41500515:41500664:-@chr15:41499795:41500225:-	TP53BP1	ENSG00000067369	0.99	0.77	0.98	0.83	0.82	0.98	TRUE	FALSE	FALSE	TRUE	TRUE	AACTTGTCTTCATTCTCTAGTCC	T
chr15:72975546:72975719:+@chr15:72976405:72976613:+@chr15:72976906:72977618:+	MPI	ENSG00000178802	0.75	0.35	0.59	0.3	0.3	0.65	TRUE	FALSE	FALSE	TRUE	TRUE	CATGACGACTGTCTCTCCAGACT	A
chr16:29913925:29914039:-@chr16:29912728:29913665:-@chr16:29912462:29912630:-	HIRIP3	ENSG00000149929	0.64	0.45	0.61	0.4	0.46	0.72	TRUE	FALSE	FALSE	TRUE	TRUE	CTCTCCTCTCCATATTCCAGAGT	A
chr16:29913925:29914039:-@chr16:29913470:29913665:-@chr16:29912462:29912630:-	HIRIP3	ENSG00000149929	0.45	0.26	0.41	0.26	0.35	0.61	TRUE	FALSE	FALSE	TRUE	TRUE	CTCTCCTCTCCATATTCCAGAGT	A
chr16:29995137:29995297:+@chr16:30000081:30000132:+@chr16:30001306:30001356:+	PPP4C	ENSG00000149923	0.88	0.77	0.9	0.67	0.81	0.94	TRUE	FALSE	FALSE	TRUE	TRUE	TGGTCTTCTCCTGTCTCCAGAGA	A
chr16:31029913:31030041:+@chr16:31030122:31030211:+@chr16:31030691:31030849:+	BCKDK	ENSG00000103507	0.97	0.79	0.95	0.76	0.8	0.94	TRUE	FALSE	FALSE	TRUE	TRUE	GGTCTTTCCCCTCTGCATAGAGC	A
chr16:87180509:87180593:+@chr16:87181451:87181522:+@chr16:87192087:87192235:+	ZC3H18	ENSG00000158545	0.37	0.17	0.39	0.15	0.26	0.55	TRUE	FALSE	FALSE	TRUE	TRUE	TTCCTGTACTTCTTTTCCAGATG	A
chr16:88626627:88626833:+@chr16:88629542:88629596:+@chr16:88630290:88630495:+	GAS8	ENSG00000141013	0.6	0.27	0.72	0.25	0.41	0.84	TRUE	FALSE	FALSE	TRUE	TRUE	GGCCGCTTCTCCCTGTGCAGAAA	A
chr17:27712024:27712099:+@chr17:27712600:27712647:+@chr17:27714046:27714116:+	ZNF207	ENSG00000010244	0.9	0.42	0.77	0.13	0.34	0.83	TRUE	FALSE	FALSE	TRUE	TRUE	TTTGTCATACATTTTCACAGATT	A
chr17:27716462:27716619:+@chr17:27717797:27717889:+@chr17:27718904:27719146:+	ZNF207	ENSG00000010244	0.16	0.04	0.14	0.03	0.04	0.33	TRUE	FALSE	FALSE	TRUE	TRUE	TCCTTTCTTTTATGCTACAGATG	A
chr17:37307528:37307618:-@chr17:37306399:37306428:-@chr17:37302812:37302953:-	ACLY	ENSG00000131473	0.54	0.43	0.61	0.36	0.5	0.68	TRUE	FALSE	FALSE	TRUE	TRUE	TTGGTCATTTTCTTTGACAGATT	A
chr17:5330418:5330464:+@chr17:5332240:5332633:+@chr17:5332867:5334854:+	MIS12	ENSG00000167842	0.51	0.24	0.5	0.12	0.25	0.59	TRUE	FALSE	FALSE	TRUE	TRUE	tctaaTTGGGTTTTTTTCAGATG	A
chr17:5330418:5330728:+@chr17:5332240:5332633:+@chr17:5332867:5334854:+	MIS12	ENSG00000167842	0.56	0.25	0.54	0.12	0.27	0.68	TRUE	FALSE	FALSE	TRUE	TRUE	tctaaTTGGGTTTTTTTCAGATG	A
chr17:77442895:77443035:+@chr17:77444724:77444786:+@chr17:77445639:77445758:+	ANAPC11	ENSG00000141552	0.79	0.69	0.79	0.68	0.74	0.83	TRUE	FALSE	FALSE	TRUE	TRUE	tttttttgtattttttgtagaga	a
chr17:77800040:77800179:-@chr17:77797141:77797204:-@chr17:77795529:77795996:-	CSNK1D	ENSG00000141551	0.67	0.52	0.71	0.43	0.54	0.7	TRUE	FALSE	FALSE	TRUE	TRUE	CTGTCTTTTCCCCACCTCAGAAT	A
chr18:9553376:9553548:-@chr18:9552920:9553044:-@chr18:9551978:9552073:-	PPP4R1	ENSG00000154845	0.32	0.51	0.32	0.52	0.46	0.34	TRUE	FALSE	FALSE	TRUE	FALSE	CTTCCCTTTTCTTTTTGGAGAGG	A
chr19:12649105:12649210:-@chr19:12648922:12649025:-@chr19:12647831:12647956:-	DHPS	ENSG00000095059	0.77	0.52	0.77	0.55	0.44	0.83	TRUE	FALSE	FALSE	TRUE	TRUE	CTTCGGCGCTCTTCCCCCAGACC	A
chr19:54861754:54861868:+@chr19:54862088:54862230:+@chr19:54863920:54864006:+	BCL2L12	ENSG00000126453	0.72	0.55	0.84	0.43	0.55	0.82	TRUE	FALSE	FALSE	TRUE	TRUE	TCTGAAGTCCTCCTCTCCAGAAG	A
chr19:54861754:54861868:+@chr19:54862091:54862230:+@chr19:54863920:54864006:+	BCL2L12	ENSG00000126453	0.55	0.36	0.74	0.27	0.41	0.7	TRUE	FALSE	FALSE	TRUE	TRUE	GAAGTCCTCCTCTCCAGAAGCCC	C
chr19:59655642:59655743:+@chr19:59656537:59656647:+@chr19:59657421:59657673:+	LENG8	ENSG00000167615	0.8	0.59	0.77	0.44	0.5	0.8	TRUE	FALSE	FALSE	TRUE	TRUE	CCCTCCCTGCGCCTTTGCAGAGC	A
chr2:118580783:118580949:+@chr2:118581136:118581235:+@chr2:118582327:118584067:+	INSIG2	ENSG00000125629	0.99	0.67	0.85	0.48	0.71	0.9	TRUE	FALSE	FALSE	TRUE	TRUE	AGACATGTCTGTTATTCTAGATA	A
chr2:24152574:24152818:-@chr2:24150450:24150568:-@chr2:24144695:24144833:-	AC008073.5	ENSG00000115128	0.94	0.81	0.92	0.74	0.87	0.94	TRUE	FALSE	FALSE	TRUE	TRUE	ATACGTATTTCTCATTTTAGATT	A
chr2:27849045:27849063:+@chr2:27850795:27850901:+@chr2:27855804:27856112:+	MRPL33	ENSG00000163797	0.59	0.18	0.57	0.16	0.2	0.75	TRUE	FALSE	FALSE	TRUE	TRUE	AGCGTACTTTTTAATCTTAGAAA	A
chr2:9925856:9926009:+@chr2:9933445:9933598:+@chr2:9940286:9940385:+	TAF1B	ENSG00000115750	0.78	0.5	0.72	0.48	0.55	0.87	TRUE	FALSE	FALSE	TRUE	TRUE	ATCTCCATTTATCTCCTAAGAAA	A
chr20:36488476:36488560:-@chr20:36484148:36484302:-@chr20:36483067:36483159:-	SNORA71	ENSG00000199452	0.65	0.27	0.49	0.12	0.23	0.68	TRUE	FALSE	FALSE	TRUE	TRUE	TGTTTCTTTGCATCCTGCAGAGT	A
chr20:36488476:36488560:-@chr20:36484153:36484302:-@chr20:36483067:36483159:-	SNORA71	ENSG00000199452	0.69	0.31	0.54	0.15	0.26	0.73	TRUE	FALSE	FALSE	TRUE	TRUE	TGTTTCTTTGCATCCTGCAGAGT	A
chr20:47238060:47238311:-@chr20:47224139:47224213:-@chr20:47203877:47204015:-	STAU1	ENSG00000124214	0.79	0.64	0.86	0.53	0.63	0.92	TRUE	FALSE	FALSE	TRUE	TRUE	tattattttttattttCCAGAGT	A
chr20:54521778:54521891:+@chr20:54525398:54525452:+@chr20:54525569:54525664:+	C20orf43	ENSG00000022277	0.91	0.66	0.91	0.6	0.7	0.91	TRUE	FALSE	FALSE	TRUE	TRUE	CATTCTCTATCTTTTTGTAGAAA	A
chr20:61984516:61984617:+@chr20:61989361:61989402:+@chr20:61990987:61991035:+	TPD52L2	ENSG00000101150	0.02	0.21	0.06	0.13	0.15	0.08	TRUE	FALSE	FALSE	TRUE	FALSE	TCTGCCATGCTTCCAAGCAGCAG	C
chr21:39474081:39474232:-@chr21:39473720:39473767:-@chr21:39472245:39472443:-	PSMG1	ENSG00000183527	0.57	0.82	0.56	0.74	0.68	0.4	TRUE	FALSE	FALSE	TRUE	FALSE	TTCAGGTTTTTCTCTGTCAGTGC	T
chr21:39474081:39474232:-@chr21:39473720:39473782:-@chr21:39472245:39472443:-	PSMG1	ENSG00000183527	0.82	0.95	0.84	0.93	0.92	0.74	TRUE	FALSE	FALSE	TRUE	FALSE	CGTGGAACTTGACTTTTCAGGTT	G
chr22:26584375:26584497:-@chr22:26580842:26580927:-@chr22:26577657:26579651:-	PITPNB	ENSG00000180957	0.96	0.67	0.89	0.28	0.61	0.84	TRUE	FALSE	FALSE	TRUE	TRUE	CAATTTTATTTTACGTTTAGATG	A
chr22:28404185:28404312:+@chr22:28407428:28407590:+@chr22:28420741:28424589:+	NF2	ENSG00000186575	0.99	0.85	0.98	0.9	0.88	0.98	TRUE	FALSE	FALSE	TRUE	TRUE	TGATACCCTCTTGCCGGCAGAGT	A
chr22:37382604:37382701:+@chr22:37391497:37391636:+@chr22:37393968:37394083:+	CBY1	ENSG00000100211	0.32	0.15	0.26	0.06	0.06	0.49	TRUE	FALSE	FALSE	TRUE	TRUE	ttgctgtgtttatacaatagaat	a
chr3:101511937:101512076:+@chr3:101513367:101513411:+@chr3:101517633:101517721:+	TBC1D23	ENSG00000036054	0.65	0.41	0.59	0.17	0.22	0.72	TRUE	FALSE	FALSE	TRUE	TRUE	TCTGCCTTGATTTGCTATAGAAT	A
chr3:121064956:121065142:-@chr3:121044792:121044890:-@chr3:121028236:121028392:-	GSK3B	ENSG00000082701	0.9	0.62	0.84	0.63	0.72	0.8	TRUE	FALSE	FALSE	TRUE	TRUE	TGTGTCTTAACCTTCTATAGAAC	A
chr3:122998655:122998764:-@chr3:122996994:122997103:-@chr3:122991610:122991752:-	IQCB1	ENSG00000173226	0.87	0.63	0.78	0.29	0.42	0.94	TRUE	FALSE	FALSE	TRUE	TRUE	AATTATTTTCGGCATTTCAGAAA	A
chr3:14186942:14187054:-@chr3:14184761:14184884:-@chr3:14183673:14183757:-	XPC	ENSG00000154767	0.96	0.6	0.95	0.48	0.56	0.99	TRUE	FALSE	FALSE	TRUE	TRUE	TTAAAAATGCTTGTTGATAGAAC	A
chr3:173955779:173955858:+@chr3:173955967:173956059:+@chr3:173957467:173957649:+	ECT2	ENSG00000114346	0.28	0.13	0.31	0.09	0.09	0.35	TRUE	FALSE	FALSE	TRUE	TRUE	CTTAAGTCTCTTTTCCACAGACT	A
chr3:33425732:33425842:-@chr3:33425186:33425293:-@chr3:33419297:33419400:-	UBP1	ENSG00000153560	0.43	0.18	0.31	0.12	0.16	0.65	TRUE	FALSE	FALSE	TRUE	TRUE	AATCTTTGGTGTTTGTCCAGATG	A
chr3:49129874:49130007:-@chr3:49129496:49129795:-@chr3:49129164:49129380:-	USP19	ENSG00000172046	0.34	0.22	0.37	0.12	0.12	0.42	TRUE	FALSE	FALSE	TRUE	TRUE	TGCTGTATCTTTGGCAGAAGAAA	A
chr3:49129874:49130007:-@chr3:49129496:49129798:-@chr3:49129164:49129380:-	USP19	ENSG00000172046	0.5	0.25	0.52	0.19	0.19	0.61	TRUE	FALSE	FALSE	TRUE	TRUE	GACTGCTGTATCTTTGGCAGAAG	A
chr3:49293181:49293284:-@chr3:49291251:49291339:-@chr3:49289998:49290888:-	USP4	ENSG00000114316	0.9	0.67	0.89	0.49	0.71	0.92	TRUE	FALSE	FALSE	TRUE	TRUE	TTTCTTTGTTGACTTGGCAGACA	A
chr4:104280862:104281020:-@chr4:104280395:104280685:-@chr4:104278957:104279055:-	CENPE	ENSG00000138778	0.13	0.01	0.18	0.04	0.03	0.16	TRUE	FALSE	FALSE	TRUE	TRUE	TGTTTTACAATTATCTCAAGATC	A
chr4:121206275:121206421:-@chr4:121202578:121202698:-@chr4:121201477:121201580:-	MAD2L1	ENSG00000164109	0.92	0.71	0.88	0.57	0.65	0.9	TRUE	FALSE	FALSE	TRUE	TRUE	TTCCTTTTTATATGTTGCAGATT	A
chr4:53960654:53960763:+@chr4:53975539:53975646:+@chr4:53986796:53986889:+	FIP1L1	ENSG00000145216	0.49	0.38	0.46	0.18	0.23	0.47	TRUE	FALSE	FALSE	TRUE	TRUE	TAGAAAATTTATCTCACCAGAAA	A
chr4:84040254:84040400:-@chr4:84039890:84039914:-@chr4:84038166:84038239:-	AC021105.13-1	ENSG00000203460	0.12	0.01	0.18	0.01	0.03	0.43	TRUE	FALSE	FALSE	TRUE	TRUE	TTTGTGTTTACTTTGTCCAGATT	A
chr5:132390088:132390139:-@chr5:132386432:132386497:-@chr5:132370350:132370511:-	ZCCHC10	ENSG00000155329	0.3	0.13	0.25	0.03	0.05	0.32	TRUE	FALSE	FALSE	TRUE	TRUE	gttaaatttcatcttgttagatt	a
chr5:137312543:137312772:-@chr5:137309816:137309899:-@chr5:137309490:137309585:-	C5orf5	ENSG00000031003	0.55	0.06	0.36	0.04	0.07	0.6	TRUE	FALSE	FALSE	TRUE	TRUE	ttttttttgtttAATTCCAGAAA	A
chr5:137384619:137384785:-@chr5:137382543:137382734:-@chr5:137381890:137382102:-	C5orf5	ENSG00000031003	0.78	0.42	0.68	0.37	0.37	0.84	TRUE	FALSE	FALSE	TRUE	TRUE	TTTTGTCTTTCATTTGGCAGAAA	A
chr5:137694575:137694806:-@chr5:137693141:137693235:-@chr5:137692072:137692117:-	CDC25C	ENSG00000158402	0.85	0.56	0.9	0.34	0.59	0.88	TRUE	FALSE	FALSE	TRUE	TRUE	GTACTATTATGTCTCAACAGAGG	A
chr5:178975733:178975825:-@chr5:178975153:178975202:-@chr5:178973785:178974566:-	HNRNPH1	ENSG00000169045	0.84	0.57	0.75	0.35	0.5	0.79	TRUE	FALSE	FALSE	TRUE	TRUE	CCTACAAAATCCTTTTGCAGACC	A
chr5:6676327:6676398:-@chr5:6675129:6675213:-@chr5:6673219:6673411:-	NSUN2	ENSG00000037474	0.97	0.7	0.93	0.44	0.73	0.93	TRUE	FALSE	FALSE	TRUE	TRUE	GTTTCTTGCTTTGTTAATAGATC	A
chr5:68897714:68897791:+@chr5:68898172:68898208:+@chr5:68898550:68898636:+	GTF2H2C	ENSG00000183474	0.84	0.48	0.84	0.34	0.46	0.69	TRUE	FALSE	FALSE	TRUE	TRUE	TGTTTGTATAATTTTAACAGAGT	A
chr5:70393271:70393348:-@chr5:70392855:70392891:-@chr5:70392427:70392513:-	GTF2H2	ENSG00000145736	0.83	0.48	0.84	0.33	0.47	0.7	TRUE	FALSE	FALSE	TRUE	TRUE	TGTTTGTATAATTTTAACAGAGT	A
chr5:70935939:70936051:+@chr5:70958223:70958336:+@chr5:70963704:70963768:+	MCCC2	ENSG00000131844	0.81	0.38	0.7	0.32	0.4	0.71	TRUE	FALSE	FALSE	TRUE	TRUE	GTCGTGTGCTTGGATTCCAGATC	A
chr5:86739549:86739759:-@chr5:86736417:86736580:-@chr5:86733275:86733345:-	CCNH	ENSG00000134480	0.87	0.6	0.77	0.25	0.37	0.9	TRUE	FALSE	FALSE	TRUE	TRUE	TTTGCAAACTTTCTTTGTAGACC	A
chr6:125663383:125663504:-@chr6:125661559:125661661:-@chr6:125655686:125655754:-	HDDC2	ENSG00000111906	0.63	0.46	0.59	0.39	0.38	0.7	TRUE	FALSE	FALSE	TRUE	TRUE	GACATTTCTTGCCTGATCAGATG	A
chr6:13434998:13435117:-@chr6:13433305:13433385:-@chr6:13429119:13429306:-	TBC1D7	ENSG00000145979	0.83	0.49	0.67	0.38	0.39	0.71	TRUE	FALSE	FALSE	TRUE	TRUE	TTGTTTTCTTCTTCCTCTAGATA	A
chr6:33050217:33050520:+@chr6:33050776:33050867:+@chr6:33051139:33051276:+	BRD2	ENSG00000204256	0.25	0.12	0.22	0.1	0.17	0.3	TRUE	FALSE	FALSE	TRUE	TRUE	GCCCTGGCTCCATTTTACAGATT	A
chr6:33651053:33651196:-@chr6:33650261:33650280:-@chr6:33649789:33649969:-	BAK1	ENSG00000030110	0.01	0.22	0.08	0.2	0.09	0.03	TRUE	FALSE	FALSE	TRUE	FALSE	GCTGTCCCTCGGGCTGCCAGGCC	G
chr7:148143531:148143571:-@chr7:148142939:148143064:-@chr7:148141984:148142162:-	EZH2	ENSG00000106462	0.97	0.78	0.98	0.41	0.74	0.96	TRUE	FALSE	FALSE	TRUE	TRUE	ATGATGTTATCTTTACTCAGACG	A
chr7:73769150:73769206:+@chr7:73771134:73771196:+@chr7:73781060:73781170:+	GTF2I	ENSG00000077809	0.39	0.18	0.29	0.21	0.24	0.36	TRUE	FALSE	FALSE	TRUE	TRUE	AGAATTTTATTTTTTTCAAGATT	A
chr7:77396362:77396580:+@chr7:77404963:77405091:+@chr7:77407283:77407555:+	PHTF2	ENSG00000006576	0.98	0.74	0.97	0.46	0.65	0.94	TRUE	FALSE	FALSE	TRUE	TRUE	aattttttttttttttataGAGT	A
chr8:144975755:144975844:-@chr8:144974824:144974874:-@chr8:144972531:144972692:-	PUF60	ENSG00000179950	0.65	0.41	0.53	0.28	0.43	0.79	TRUE	FALSE	FALSE	TRUE	TRUE	CTGTCTTTACTGTCTTTCAGATG	A
chr8:54889775:54889879:-@chr8:54886277:54886330:-@chr8:54876912:54877009:-	ATP6V1H	ENSG00000047249	0.63	0.35	0.63	0.15	0.27	0.56	TRUE	FALSE	FALSE	TRUE	TRUE	AGTTATTTATTTCGTAATAGAAA	A
chr8:82748631:82748739:-@chr8:82745729:82745837:-@chr8:82735306:82735457:-	IMPA1	ENSG00000133731	0.86	0.63	0.81	0.49	0.7	0.8	TRUE	FALSE	FALSE	TRUE	TRUE	ACCTAACACTTTCTTTTTAGATA	A
chr9:124087269:124087387:+@chr9:124087880:124088046:+@chr9:124088139:124088266:+	MRRF	ENSG00000148187	0.54	0.17	0.43	0.04	0.15	0.87	TRUE	FALSE	FALSE	TRUE	TRUE	attgagttttttttttaaagact	a
chr9:139591743:139591876:-@chr9:139590582:139590675:-@chr9:139590353:139590440:-	WDR85	ENSG00000148399	0.46	0.32	0.54	0.05	0.26	0.76	TRUE	FALSE	FALSE	TRUE	TRUE	tgtatcttttctatgtttagata	a
chr9:34607882:34607968:-@chr9:34606027:34606112:-@chr9:34604707:34604765:-	DCTN3	ENSG00000137100	0.93	0.78	0.93	0.75	0.58	0.94	TRUE	FALSE	FALSE	TRUE	TRUE	ATCTTGTCCATTTTTGCTTTAGA	A
chr9:37844777:37844979:+@chr9:37847238:37847348:+@chr9:37850045:37850190:+	WDR32	ENSG00000122741	0.58	0.21	0.46	0.09	0.21	0.68	TRUE	FALSE	FALSE	TRUE	TRUE	GAATTTTTTATATTTTTAAGATT	A
chr9:85473920:85474062:-@chr9:85471085:85471168:-@chr9:85469765:85469880:-	UBQLN1	ENSG00000135018	0.86	0.41	0.81	0.29	0.52	0.81	TRUE	FALSE	FALSE	TRUE	TRUE	TTTGAACACTTGCCCCATAGATG	A
chrX:107255963:107256073:+@chrX:107258667:107258738:+@chrX:107261146:107261244:+	ATG4A	ENSG00000101844	0.91	0.6	0.91	0.48	0.71	0.9	TRUE	FALSE	FALSE	TRUE	TRUE	AATTTTACATTTAATTACAGAAA	A
chrX:128537975:128538210:+@chrX:128546002:128546025:+@chrX:128548660:128548776:+	AL022162.1	ENSG00000214977	0.32	0.57	0.3	0.61	0.71	0.23	TRUE	FALSE	FALSE	TRUE	FALSE	TTTTCCTGCTCCGCTCTCAGGAA	G
chrX:13617262:13617328:+@chrX:13631854:13631942:+@chrX:13636761:13637866:+	RAB9A	ENSG00000123595	0.74	0.41	0.73	0.54	0.35	0.64	TRUE	FALSE	FALSE	TRUE	TRUE	ttcatgtattcatttcacagaca	a
chrX:39816546:39819377:-@chrX:39815834:39815887:-@chrX:39815170:39815356:-	BCOR	ENSG00000183337	0.45	0.13	0.37	0.09	0.18	0.62	TRUE	FALSE	FALSE	TRUE	TRUE	TGCCCATTTTAATTACATAGATG	A
chrX:48644151:48644263:+@chrX:48644454:48644605:+@chrX:48644953:48645016:+	PQBP1	ENSG00000102103	0.87	0.72	0.84	0.45	0.46	0.86	TRUE	FALSE	FALSE	TRUE	TRUE	TTCAAGACTTGTGTCCCCAGATG	A
chrX:48644151:48644263:+@chrX:48644454:48644738:+@chrX:48644953:48645016:+	PQBP1	ENSG00000102103	0.89	0.76	0.85	0.47	0.46	0.86	TRUE	FALSE	FALSE	TRUE	TRUE	TTCAAGACTTGTGTCCCCAGATG	A
chrX:70594816:70594941:+@chrX:70595725:70595826:+@chrX:70596127:70596283:+	AL590763.2-2	ENSG00000215120	0.32	0.17	0.36	0.1	0.19	0.56	TRUE	FALSE	FALSE	TRUE	TRUE	TATTTGTGTTCCTTACTCAGATG	A
chr1:152409500:152409569:-@chr1:152408405:152408483:-@chr1:152394404:152396821:-	SRP_euk_arch	ENSG00000222082	0.04	0.33	0.14	0.19	0.13	0.17	TRUE	FALSE	TRUE	TRUE	FALSE	TGGTTCCTGTGCCTGTCCAGATG	A
chr1:191256850:191256948:-@chr1:191256060:191256209:-@chr1:191254158:191254573:-	UCHL5	ENSG00000116750	0.48	0.16	0.45	0.31	0.32	0.6	TRUE	FALSE	TRUE	TRUE	TRUE	gttacctggcccctccccagata	a
chr1:220824093:220824262:-@chr1:220819724:220819837:-@chr1:220817410:220817608:-	TAF1A	ENSG00000143498	0.52	0.31	0.59	0.25	0.44	0.72	TRUE	FALSE	TRUE	TRUE	TRUE	AGTAATTTCTGCTTTGACAGATT	A
chr1:24170927:24171089:-@chr1:24170650:24170700:-@chr1:24165524:24166800:-	FUSIP1	ENSG00000188529	0.59	0.72	0.48	0.67	0.59	0.28	TRUE	FALSE	TRUE	TRUE	FALSE	TCTGATATGCTTTTTAGCAGTAG	T
chr1:47611214:47611366:+@chr1:47613168:47613244:+@chr1:47613456:47613552:+	CMPK1	ENSG00000162368	0.91	0.71	0.92	0.61	0.83	0.95	TRUE	FALSE	TRUE	TRUE	TRUE	AACTTTGTATCTCTTTTTAGATT	A
chr1_random:1506012:1506174:-@chr1_random:1505735:1505785:-@chr1_random:1500602:1501878:-	N/A	N/A	0.6	0.72	0.48	0.66	0.59	0.28	TRUE	FALSE	TRUE	TRUE	FALSE	TCTGATATGCTTTTTAGCAGTAG	T
chr10:28919655:28919767:+@chr10:28924668:28924976:+@chr10:28937121:28937366:+	WAC	ENSG00000095787	0.81	0.92	0.73	0.87	0.83	0.73	TRUE	FALSE	TRUE	TRUE	FALSE	TTTCGAACTGTGAACTAAAGTGG	T
chr11:13441215:13441414:-@chr11:13423147:13423304:-@chr11:13399765:13399961:-	BTBD10	ENSG00000148925	0.44	0.66	0.34	0.6	0.44	0.5	TRUE	FALSE	TRUE	TRUE	FALSE	AACACTGCTCTTTTATGTAGGTT	G
chr11:95194683:95194790:+@chr11:95195311:95195388:+@chr11:95200598:95200839:+	CEP57	ENSG00000166037	0.84	0.6	0.99	0.35	0.78	0.98	TRUE	FALSE	TRUE	TRUE	TRUE	TTCCTTTTCTTTTCATTCAGAAA	A
chr12:22105033:22105127:+@chr12:22105482:22105653:+@chr12:22106482:22106635:+	CMAS	ENSG00000111726	0.84	0.59	0.87	0.64	0.76	0.98	TRUE	FALSE	TRUE	TRUE	TRUE	TCTATTTTGGTTTCTTTTAGATA	A
chr12:31147137:31147221:+@chr12:31147518:31147596:+@chr12:31147778:31147932:+	DDX11	ENSG00000013573	0.9	0.57	0.93	0.65	0.93	0.91	TRUE	FALSE	TRUE	TRUE	TRUE	GTCTTCCCCTTCACTCCCAGCCC	C
chr12:31147137:31147221:+@chr12:31147523:31147596:+@chr12:31147778:31147932:+	DDX11	ENSG00000013573	0.85	0.45	0.88	0.52	0.86	0.81	TRUE	FALSE	TRUE	TRUE	TRUE	CCCCTTCACTCCCAGCCCAGAGC	A
chr14:34660859:34661270:-@chr14:34655567:34655694:-@chr14:34649482:34649586:-	C14orf10	ENSG00000092020	0.58	0.42	0.63	0.31	0.54	0.82	TRUE	FALSE	TRUE	TRUE	TRUE	TTAATCTGTTTTGTTACCAGAAA	A
chr17:5266813:5266873:+@chr17:5270280:5270343:+@chr17:5276586:5276920:+	AC004148.1	ENSG00000215099	0.29	0.48	0.3	0.42	0.25	0.18	TRUE	FALSE	TRUE	TRUE	FALSE	GATCCTAATTCTGCTTCTAGGTA	G
chr17:63386119:63386453:+@chr17:63389911:63390084:+@chr17:63390790:63390982:+	FALZ	ENSG00000171634	0.57	0.68	0.4	0.59	0.43	0.45	TRUE	FALSE	TRUE	TRUE	FALSE	TTCATTGTGAATACTTTTAGGTT	G
chr17:77442895:77443005:+@chr17:77444724:77444786:+@chr17:77445639:77445758:+	ANAPC11	ENSG00000141552	0.69	0.56	0.74	0.55	0.66	0.76	TRUE	FALSE	TRUE	TRUE	TRUE	tttttttgtattttttgtagaga	a
chr19:6695811:6696005:+@chr19:6697040:6697207:+@chr19:6697463:6697572:+	TRIP10	ENSG00000125733	0.06	0.44	0.18	0.35	0.21	0.17	TRUE	FALSE	TRUE	TRUE	FALSE	TCCCCGGCCCCCGCCGGTAGCCT	C
chr3:187988286:187988365:+@chr3:187988793:187988899:+@chr3:187989608:187990379:+	EIF4A2	ENSG00000156976	0.58	0.79	0.47	0.81	0.6	0.4	TRUE	FALSE	TRUE	TRUE	FALSE	AGACTTTTTAAAAAATACAGGAG	G
chr4:83566214:83566306:-@chr4:83565740:83565844:-@chr4:83563371:83565060:-	HNRPDL	ENSG00000152795	0.54	0.74	0.59	0.72	0.57	0.28	TRUE	FALSE	TRUE	TRUE	FALSE	ACCTTGTTTGTACCCGCCAGCGG	C
chr6:2957777:2957907:+@chr6:2960763:2960876:+@chr6:2962117:2962218:+	NQO2	ENSG00000124588	0.86	0.52	0.72	0.64	0.73	0.74	TRUE	FALSE	TRUE	TRUE	TRUE	TTTGGTGTTGCCGCCCACAGTTC	T
chr6:4947334:4947478:-@chr6:4945796:4945864:-@chr6:4945042:4945137:-	RPP40	ENSG00000124787	0.91	0.77	0.9	0.88	0.91	0.91	TRUE	FALSE	TRUE	TRUE	TRUE	CTCTGTACTTTCTCTTCCAGGTT	G
chr8:90839110:90839596:+@chr8:90844194:90844347:+@chr8:90846706:90846861:+	RIPK2	ENSG00000104312	0.56	0.22	0.51	0.35	0.59	0.47	TRUE	FALSE	TRUE	TRUE	TRUE	TATGCATTTTTTTTTCTTAGTGA	T
chrX:102826265:102826313:-@chrX:102820083:102820204:-@chrX:102817082:102818635:-	MORF4L2	ENSG00000123562	0.61	0.5	0.71	0.54	0.68	0.86	TRUE	FALSE	TRUE	TRUE	TRUE	AAAGTTCATCTTCATTGCAGATA	A
chrX:102826265:102826313:-@chrX:102820083:102820235:-@chrX:102817082:102818635:-	MORF4L2	ENSG00000123562	0.56	0.43	0.63	0.46	0.6	0.8	TRUE	FALSE	TRUE	TRUE	TRUE	ATTTTTTTTCTTTTTCTTAGATG	A
chrX:102826755:102826844:-@chrX:102820083:102820184:-@chrX:102817082:102818635:-	MORF4L2	ENSG00000123562	0.81	0.65	0.76	0.7	0.79	0.78	TRUE	FALSE	TRUE	TRUE	TRUE	ATACCTGCCTTTCTTTCTAGGTT	G
chrX:102826755:102826844:-@chrX:102820083:102820204:-@chrX:102817082:102818635:-	MORF4L2	ENSG00000123562	0.6	0.42	0.61	0.48	0.58	0.69	TRUE	FALSE	TRUE	TRUE	TRUE	AAAGTTCATCTTCATTGCAGATA	A
chrX:102826755:102826844:-@chrX:102820083:102820235:-@chrX:102817082:102818635:-	MORF4L2	ENSG00000123562	0.64	0.41	0.61	0.44	0.55	0.71	TRUE	FALSE	TRUE	TRUE	TRUE	ATTTTTTTTCTTTTTCTTAGATG	A
chr1:154530433:154530651:-@chr1:154529735:154529991:-@chr1:154529102:154529624:-	C1orf85	ENSG00000198715	0.87	0.74	0.85	0.86	0.83	0.88	TRUE	TRUE	FALSE	TRUE	TRUE	TTGTTTGCCTTTCTTCCCAGTTG	T
chr1:40086245:40086356:-@chr1:40085807:40086006:-@chr1:40085479:40085556:-	TRIT1	ENSG00000043514	0.82	0.51	0.74	0.93	0.66	0.84	TRUE	TRUE	FALSE	TRUE	TRUE	tcaatttccttatctgacagatg	a
chr14:44635056:44635181:+@chr14:44635377:44635711:+@chr14:44635840:44635958:+	PRPF39	ENSG00000185246	0.45	0.16	0.34	0.32	0.25	0.36	TRUE	TRUE	FALSE	TRUE	TRUE	TTTTCTCTCTTTGTTGGCAGGTG	G
chr14:73413454:73413624:+@chr14:73415552:73415761:+@chr14:73416511:73416632:+	PTGR2	ENSG00000140043	0.79	0.36	0.67	0.6	0.57	0.79	TRUE	TRUE	FALSE	TRUE	TRUE	TCTTCAAATTTCCCCCCTAGATT	A
chr2:131578890:131579441:+@chr2:131594977:131595021:+@chr2:131599796:131599948:+	PLEKHB2	ENSG00000115762	0.97	0.8	0.92	0.96	0.9	0.96	TRUE	TRUE	FALSE	TRUE	TRUE	TGCCTGTTTTTGTTCTGTAGGTG	G
chr2:227913252:227913340:+@chr2:227925474:227925533:+@chr2:227928637:227928721:+	MFF	ENSG00000168958	0.5	0.82	0.52	0.5	0.66	0.47	TRUE	TRUE	FALSE	TRUE	FALSE	CCCGCAAAAACCTGCCTTAGACC	A
chr3:3170108:3170172:-@chr3:3169140:3169271:-@chr3:3166696:3167729:-	CRBN	ENSG00000113851	0.97	0.86	0.97	0.96	0.93	0.96	TRUE	TRUE	FALSE	TRUE	TRUE	ATGTTGATTCTTTGTTTTAGTTT	T
chr4:26040618:26040773:+@chr4:26041139:26041242:+@chr4:26041412:26042376:+	RBPSUH	ENSG00000168214	0.96	0.76	0.97	0.97	0.89	0.93	TRUE	TRUE	FALSE	TRUE	TRUE	TGATTTTCTGTGAATTGCAGTTG	T
chr5:134724086:134724196:-@chr5:134714412:134714502:-@chr5:134709557:134709646:-	H2AFY	ENSG00000113648	0.26	0.11	0.27	0.32	0.2	0.47	TRUE	TRUE	FALSE	TRUE	TRUE	CATTTGTTTACCTGTTATAGTTG	T
chr6:43092850:43093062:+@chr6:43093235:43093411:+@chr6:43093569:43093684:+	KLHDC3	ENSG00000124702	0.97	0.83	0.92	0.91	0.89	0.91	TRUE	TRUE	FALSE	TRUE	TRUE	GAGCAGAGCTGTGCCCACAGTGT	T
chr8:55054138:55054284:-@chr8:55053636:55053810:-@chr8:55045505:55045576:-	TCEA1P2	ENSG00000187735	0.13	0.02	0.12	0.18	0.07	0.13	TRUE	TRUE	FALSE	TRUE	TRUE	agtctttctgtctctcacagtgt	t
chrX:133743517:133743613:-@chrX:133733139:133733979:-@chrX:133731263:133733050:-	FAM122B	ENSG00000156504	0.85	0.52	0.76	0.7	0.67	0.85	TRUE	TRUE	FALSE	TRUE	TRUE	TCTTTTTGCTTTGTCTTCAGTTC	T
chrX:54971761:54971868:+@chrX:54973899:54974189:+@chrX:54974362:54974591:+	TRO	ENSG00000067445	0.83	0.61	0.77	0.83	0.67	0.87	TRUE	TRUE	FALSE	TRUE	TRUE	ACCATCATTGGCTTTGGCAGTGG	T
chr1:109770447:109770593:-@chr1:109766005:109766071:-@chr1:109759382:109759508:-	PSMA5	ENSG00000143106	0.93	0.73	0.91	0.91	0.93	0.88	TRUE	TRUE	TRUE	TRUE	TRUE	aatttttttttaaattataGGGG	G
chr1:147199410:147199544:+@chr1:147199915:147199992:+@chr1:147217869:147218219:+	AL663102.4	ENSG00000143429	0.31	0.13	0.41	0.39	0.36	0.25	TRUE	TRUE	TRUE	TRUE	TRUE	TACCCTTCTGCTGCCCGCAGGAT	G
chr1:152459442:152459897:-@chr1:152458936:152459037:-@chr1:152453557:152453674:-	C1orf43	ENSG00000143612	0.74	0.44	0.71	0.75	0.77	0.68	TRUE	TRUE	TRUE	TRUE	TRUE	TTTTACATCTTTTTGGACAGGTG	G
chr1:153476301:153476492:-@chr1:153476031:153476177:-@chr1:153474932:153475065:-	GBA	ENSG00000177628	0.97	0.8	0.9	0.93	0.92	0.9	TRUE	TRUE	TRUE	TRUE	TRUE	TTCCCTGTGGATGTCCTCAGGCC	G
chr1:153848597:153848731:+@chr1:153848833:153848985:+@chr1:153849259:153849390:+	MSTO1	ENSG00000125459	0.99	0.86	0.95	0.97	0.98	0.96	TRUE	TRUE	TRUE	TRUE	TRUE	AACTACTCTTTCTTCACCAGGAG	G
chr1:153984177:153984311:+@chr1:153984392:153984542:+@chr1:153984815:153984946:+	N/A	N/A	0.63	0.45	0.8	0.77	0.85	0.66	TRUE	TRUE	TRUE	TRUE	TRUE	CTGGTTTTTTTCTTTACGAGGAG	G
chr1:154147658:154147817:-@chr1:154147071:154147219:-@chr1:154146865:154146921:-	RIT1	ENSG00000143622	0.66	0.37	0.77	0.85	0.84	0.77	TRUE	TRUE	TRUE	TRUE	TRUE	ATTTCCTCCTCCTTTTCTAGGTG	G
chr1:1677557:1677642:-@chr1:1676673:1676775:-@chr1:1675843:1675997:-	NADK	ENSG00000008130	0.85	0.62	0.85	0.94	0.93	0.79	TRUE	TRUE	TRUE	TRUE	TRUE	ACCTCTCCGTCGGCTCACAGGGC	G
chr1:191256850:191256948:-@chr1:191256060:191256134:-@chr1:191251522:191252148:-	UCHL5	ENSG00000116750	0.21	0.08	0.28	0.45	0.33	0.19	TRUE	TRUE	TRUE	TRUE	TRUE	aactggtctgtgtaccacagttt	t
chr1:191256850:191256948:-@chr1:191256060:191256209:-@chr1:191251522:191252148:-	UCHL5	ENSG00000116750	0.19	0.07	0.23	0.18	0.16	0.37	TRUE	TRUE	TRUE	TRUE	TRUE	gttacctggcccctccccagata	a
chr1:204010584:204010837:-@chr1:204008247:204008318:-@chr1:204007223:204007404:-	RAB7L1	ENSG00000117280	0.92	0.74	0.9	0.91	0.89	0.89	TRUE	TRUE	TRUE	TRUE	TRUE	TAATGTACATATATTTTCAGTGG	T
chr1:218893066:218893317:+@chr1:218897755:218897799:+@chr1:218901777:218904422:+	MARK1	ENSG00000116141	0.66	0.2	0.63	0.6	0.62	0.53	TRUE	TRUE	TRUE	TRUE	TRUE	AACCTTCACTTTGTTTTGAGGGA	G
chr1:224178367:224178663:-@chr1:224178024:224178093:-@chr1:224176527:224176706:-	PYCR2	ENSG00000143811	0.97	0.85	0.99	0.98	0.95	0.96	TRUE	TRUE	TRUE	TRUE	TRUE	AAAGCTCTGTCTTCTGCAGGCAT	C
chr1:25539552:25539657:+@chr1:25542039:25542151:+@chr1:25550704:25550771:+	TMEM50A	ENSG00000183726	0.91	0.72	0.89	0.87	0.92	0.88	TRUE	TRUE	TRUE	TRUE	TRUE	TGGTATCACCTTTGTTTTAGTTT	T
chr1:31883029:31883425:-@chr1:31873410:31873710:-@chr1:31871347:31871502:-	PEF1	ENSG00000162517	0.96	0.68	0.91	0.93	0.95	0.88	TRUE	TRUE	TRUE	TRUE	TRUE	ATATCTTGCTCTTCCTGCAGGGC	G
chr1:36387525:36387702:-@chr1:36375984:36376166:-@chr1:36374757:36375510:-	TRAPPC3	ENSG00000054116	0.95	0.81	0.92	0.94	0.94	0.98	TRUE	TRUE	TRUE	TRUE	TRUE	TGTTGTGTGTCCCCTGACAGGTG	G
chr1:39802682:39802801:-@chr1:39802095:39802181:-@chr1:39801873:39802000:-	PABPC4	ENSG00000090621	0.72	0.5	0.75	0.76	0.77	0.65	TRUE	TRUE	TRUE	TRUE	TRUE	CATTTGCTGGTCTGTTGTAGGGT	G
chr1:39802730:39802801:-@chr1:39802095:39802181:-@chr1:39801873:39802000:-	PABPC4	ENSG00000090621	0.79	0.46	0.89	0.8	0.78	0.77	TRUE	TRUE	TRUE	TRUE	TRUE	CATTTGCTGGTCTGTTGTAGGGT	G
chr1:45924671:45924889:-@chr1:45923835:45923879:-@chr1:45898443:45899484:-	GPBP1L1	ENSG00000159592	0.59	0.42	0.59	0.77	0.57	0.56	TRUE	TRUE	TRUE	TRUE	TRUE	GATATTTTGGTTTTTTGCAGTTG	T
chr1:97042929:97043083:+@chr1:97044563:97044596:+@chr1:97045010:97045102:+	PTBP2	ENSG00000117569	0.37	0.8	0.37	0.47	0.36	0.55	TRUE	TRUE	TRUE	TRUE	FALSE	GCTCTTCTCTCCTTCTAAAGATG	A
chr11:107510158:107510253:+@chr11:107511079:107511179:+@chr11:107514835:107514978:+	ACAT1	ENSG00000075239	0.95	0.84	0.96	0.96	0.95	0.92	TRUE	TRUE	TRUE	TRUE	TRUE	GTGACTTATATTGGTTTTAGGCT	G
chr11:62252528:62253134:+@chr11:62257166:62257247:+@chr11:62259430:62259612:+	TTC9C	ENSG00000162222	0.28	0.05	0.21	0.31	0.23	0.23	TRUE	TRUE	TRUE	TRUE	TRUE	ACTATGTTTAATTCCCACAGTTG	T
chr11:73193720:73193772:+@chr11:73197006:73197043:+@chr11:73214401:73214489:+	MRPL48	ENSG00000175581	0.89	0.59	0.86	0.94	0.89	0.8	TRUE	TRUE	TRUE	TRUE	TRUE	TACTTTCTCCCTCCTTTTAGGTT	G
chr11:85036611:85036781:+@chr11:85038941:85039033:+@chr11:85042755:85042948:+	TMEM126A	ENSG00000171202	0.88	0.47	0.77	0.95	0.77	0.81	TRUE	TRUE	TRUE	TRUE	TRUE	ATATCTTCATGTTTTTTAAGGCT	G
chr11:85385517:85385620:-@chr11:85378941:85379090:-@chr11:85372557:85372664:-	PICALM	ENSG00000073921	0.45	0.67	0.41	0.3	0.54	0.49	TRUE	TRUE	TRUE	TRUE	FALSE	AATACATTTGGACTGCACAGATC	A
chr12:110935535:110935796:+@chr12:110941943:110942081:+@chr12:110944337:110945407:+	ERP29	ENSG00000089248	0.76	0.62	0.71	0.77	0.78	0.71	TRUE	TRUE	TRUE	TRUE	TRUE	TCAGCTCTATACGCCCTCAGGTC	G
chr12:119503301:119503443:-@chr12:119501960:119502109:-@chr12:119501700:119501783:-	POP5	ENSG00000167272	0.91	0.78	0.9	0.94	0.94	0.91	TRUE	TRUE	TRUE	TRUE	TRUE	ATTTTTCTTTCCTGTTGTAGTTC	T
chr12:120817028:120817130:+@chr12:120821923:120822134:+@chr12:120825295:120825396:+	PSMD9	ENSG00000110801	0.89	0.74	0.91	0.94	0.91	0.95	TRUE	TRUE	TRUE	TRUE	TRUE	ATGTGTGGTTCTCATCCCAGGCC	G
chr12:26960202:26960380:-@chr12:26958608:26958778:-@chr12:26958174:26958328:-	C12orf11	ENSG00000064102	0.95	0.7	0.85	0.89	0.9	0.85	TRUE	TRUE	TRUE	TRUE	TRUE	TCTTATTTGGTTATCATTAGGAT	G
chr12:54894009:54894121:-@chr12:54893047:54893189:-@chr12:54890348:54890619:-	RNF41	ENSG00000181852	0.16	0.51	0.26	0.33	0.24	0.27	TRUE	TRUE	TRUE	TRUE	FALSE	TCCTGGGATCTACTGAAAAGACC	A
chr12:6658373:6658610:-@chr12:6658090:6658137:-@chr12:6657554:6657887:-	ZNF384	ENSG00000126746	0.22	0.09	0.31	0.25	0.26	0.22	TRUE	TRUE	TRUE	TRUE	TRUE	cttTCCTTCTCTGAATCAAGGAG	G
chr13:26902670:26902758:+@chr13:26904868:26904941:+@chr13:26906276:26906356:+	GTF3A	ENSG00000122034	0.95	0.78	0.9	0.95	0.93	0.87	TRUE	TRUE	TRUE	TRUE	TRUE	CTCATGTGTTGCCAATGCAGGTG	G
chr14:103027867:103028124:+@chr14:103036246:103036290:+@chr14:103038972:103039919:+	MARK3	ENSG00000075413	0.11	0.32	0.18	0.15	0.18	0.18	TRUE	TRUE	TRUE	TRUE	FALSE	TCTACATTCTGTTCATTGAGGCT	G
chr14:23641802:23641939:+@chr14:23642209:23642304:+@chr14:23642559:23643179:+	PCK2	ENSG00000100889	0.74	0.48	0.63	0.82	0.82	0.67	TRUE	TRUE	TRUE	TRUE	TRUE	TCTGTTCATTGGTGATCTAGGGG	G
chr15:100323796:100323949:+@chr15:100330309:100330420:+@chr15:100330627:100330773:+	FAM39B	ENSG00000185596	0.67	0.44	0.73	0.72	0.82	0.59	TRUE	TRUE	TRUE	TRUE	TRUE	TGTGATCTTCTCCATGGCAGGAT	G
chr15:100323796:100323949:+@chr15:100330319:100330420:+@chr15:100330627:100330773:+	FAM39B	ENSG00000185596	0.64	0.36	0.61	0.65	0.78	0.54	TRUE	TRUE	TRUE	TRUE	TRUE	TCCATGGCAGGATCTCCCAGCAG	C
chr15:38808995:38809124:+@chr15:38809343:38809464:+@chr15:38810545:38811648:+	RAD51	ENSG00000051180	0.95	0.8	0.94	0.96	0.92	0.92	TRUE	TRUE	TRUE	TRUE	TRUE	ATTTATCCTTTCCCCATCAGTTT	T
chr15:67532213:67532413:+@chr15:67533040:67533114:+@chr15:67534563:67534680:+	RPLP1	ENSG00000137818	0.94	0.83	0.91	0.89	0.92	0.92	TRUE	TRUE	TRUE	TRUE	TRUE	GACGTTTTTATTTGTTGTAGGAG	G
chr15:91227077:91227420:+@chr15:91227819:91228012:+@chr15:91229749:91229818:+	N/A	N/A	0.92	0.8	0.9	0.96	0.97	0.94	TRUE	TRUE	TRUE	TRUE	TRUE	GGTAAAAAAATCCCTTTCAGGTT	G
chr16:2258057:2258115:-@chr16:2254575:2254762:-@chr16:2254178:2254333:-	AC009065.8-3	ENSG00000207715	0.49	0.7	0.57	0.58	0.57	0.58	TRUE	TRUE	TRUE	TRUE	FALSE	CCCTTTTATCTTGTTATTAGGCT	G
chr16:24722999:24723141:+@chr16:24723527:24723673:+@chr16:24723836:24723973:+	TNRC6A	ENSG00000090905	0.15	0.35	0.1	0.1	0.16	0.21	TRUE	TRUE	TRUE	TRUE	FALSE	CTTTCTGTCTGTCCAATCAGGAT	G
chr16:28751027:28751221:+@chr16:28751318:28751389:+@chr16:28751639:28751709:+	ATXN2L	ENSG00000168488	0.49	0.19	0.48	0.4	0.46	0.46	TRUE	TRUE	TRUE	TRUE	TRUE	ATTTCTCTTTACTTGAACAGTAA	T
chr16:56023900:56023973:-@chr16:56022564:56022679:-@chr16:56021671:56021752:-	CIAPIN1	ENSG00000005194	0.89	0.72	0.91	0.96	0.9	0.95	TRUE	TRUE	TRUE	TRUE	TRUE	tTGCTTTGAACACTCTCCAGGAT	G
chr16:8630088:8630468:+@chr16:8636397:8636437:+@chr16:8636526:8636670:+	C16orf68	ENSG00000067365	0.16	0.04	0.29	0.15	0.18	0.22	TRUE	TRUE	TRUE	TRUE	TRUE	TTGGTTTCTGTCCCATCCAGAGC	A
chr17:18184082:18184294:-@chr17:18177205:18177327:-@chr17:18174594:18174710:-	SHMT1	ENSG00000176974	0.58	0.34	0.72	0.81	0.78	0.63	TRUE	TRUE	TRUE	TRUE	TRUE	CATTGTCTCTTCTTGTCCAGGGG	G
chr17:39587450:39587558:+@chr17:39587747:39587832:+@chr17:39588180:39588305:+	C17orf53	ENSG00000125319	0.82	0.65	0.85	0.86	0.86	0.89	TRUE	TRUE	TRUE	TRUE	TRUE	GGGCCATGTGGTATTTGCAGGAG	G
chr17:68743210:68744729:+@chr17:68749978:68750085:+@chr17:68750630:68750737:+	C17orf80	ENSG00000141219	0.52	0.28	0.47	0.7	0.66	0.61	TRUE	TRUE	TRUE	TRUE	TRUE	ACTTCTGTTTGGAACCATAGTTT	T
chr18:2767804:2767913:+@chr18:2768167:2768237:+@chr18:2774448:2774619:+	Y_RNA	ENSG00000207034	0.93	0.45	0.86	0.94	0.87	0.76	TRUE	TRUE	TRUE	TRUE	TRUE	TCATTTATTGACTTTTTTAGTAT	T
chr18:31972231:31972387:+@chr18:31972756:31972833:+@chr18:31975098:31975162:+	STATIP1	ENSG00000134759	0.91	0.36	0.95	0.89	0.92	0.7	TRUE	TRUE	TRUE	TRUE	TRUE	TGTTTTTTATTATTTCTTAGTAA	T
chr18:46053932:46054231:-@chr18:46053702:46053839:-@chr18:46053192:46053323:-	MBD1	ENSG00000141644	0.6	0.33	0.55	0.64	0.6	0.52	TRUE	TRUE	TRUE	TRUE	TRUE	TGCAATCCTCCCTCACGCAGGAG	G
chr19:1221927:1222035:+@chr19:1222120:1222245:+@chr19:1222328:1222466:+	CIRBP	ENSG00000099622	0.92	0.79	0.95	0.95	0.95	0.94	TRUE	TRUE	TRUE	TRUE	TRUE	CAGCTGGGTGCTGACTGCAGACC	A
chr19:6695811:6696005:+@chr19:6697189:6697207:+@chr19:6697463:6697572:+	TRIP10	ENSG00000125733	0.01	0.22	0.03	0.06	0.04	0.03	TRUE	TRUE	TRUE	TRUE	FALSE	AGGCTAGCATCCTTCCGCAGCCT	C
chr19:756013:756187:+@chr19:756492:756569:+@chr19:757408:757556:+	PTBP1	ENSG00000011304	0.82	0.6	0.79	0.88	0.83	0.75	TRUE	TRUE	TRUE	TRUE	TRUE	AGTGTCTCATTTATTTCTAGGTG	G
chr2:113016084:113016719:+@chr2:113021060:113021227:+@chr2:113021469:113021615:+	POLR1B	ENSG00000125630	0.99	0.81	0.95	0.96	0.97	0.93	TRUE	TRUE	TRUE	TRUE	TRUE	TAGTGTGAATTGCATTTCAGGCT	G
chr2:113016084:113016719:+@chr2:113021131:113021227:+@chr2:113021469:113021615:+	POLR1B	ENSG00000125630	0.98	0.6	0.88	0.91	0.92	0.81	TRUE	TRUE	TRUE	TRUE	TRUE	ATTCTGGATGCTGTTATCAGTCC	T
chr2:160327637:160327750:+@chr2:160329383:160329431:+@chr2:160332041:160333330:+	MARCH7	ENSG00000136536	0.88	0.55	0.79	0.81	0.82	0.74	TRUE	TRUE	TRUE	TRUE	TRUE	TCTTTCTGCATTGTTTCTAGTTT	T
chr2:175666035:175666241:-@chr2:175665517:175665590:-@chr2:175653634:175653739:-	ATF2	ENSG00000115966	0.22	0.06	0.15	0.27	0.22	0.2	TRUE	TRUE	TRUE	TRUE	TRUE	CTGTTTTGTTTTATTTAAAGTGA	T
chr2:20029966:20030151:-@chr2:20023796:20023856:-@chr2:20017076:20017220:-	WDR35	ENSG00000118965	0.59	0.36	0.53	0.68	0.67	0.63	TRUE	TRUE	TRUE	TRUE	TRUE	TTTGTTTTATTTGTTCACAGTTT	T
chr2:201434206:201434434:-@chr2:201433093:201433183:-@chr2:201432648:201432714:-	CLK1	ENSG00000013441	0.74	0.92	0.71	0.81	0.8	0.82	TRUE	TRUE	TRUE	TRUE	FALSE	CGCCCACTTGACGTTTCCAGAAG	A
chr2:96763873:96763990:-@chr2:96762983:96763065:-@chr2:96741328:96741489:-	LMAN2L	ENSG00000114988	0.57	0.34	0.52	0.67	0.71	0.67	TRUE	TRUE	TRUE	TRUE	TRUE	CATCTGTTCTCTCTCTCTAGGGC	G
chr20:10349176:10349406:-@chr20:10341178:10342579:-@chr20:10337276:10337451:-	MKKS	ENSG00000125863	0.49	0.36	0.48	0.54	0.49	0.48	TRUE	TRUE	TRUE	TRUE	TRUE	TTTTTTTTATTATTTATTAGGTA	G
chr20:47329048:47329152:+@chr20:47330429:47330514:+@chr20:47338989:47339202:+	SNORD12	ENSG00000212304	0.83	0.62	0.74	0.73	0.75	0.74	TRUE	TRUE	TRUE	TRUE	TRUE	TTTCTGTTTTTTCATTTCAGGTT	G
chr20:56426673:56426825:+@chr20:56447407:56447487:+@chr20:56449369:56449545:+	VAPB	ENSG00000124164	0.78	0.52	0.75	0.84	0.87	0.93	TRUE	TRUE	TRUE	TRUE	TRUE	TTAAATTTAAATTGTTTTAGTGG	T
chr21:26294201:26294368:-@chr21:26291546:26291602:-@chr21:26276528:26276661:-	APP	ENSG00000142192	0.33	0.22	0.31	0.38	0.38	0.41	TRUE	TRUE	TRUE	TRUE	TRUE	TTCTCTTATTTTTTCCATAGTGT	T
chr21:44381487:44381606:+@chr21:44384560:44384652:+@chr21:44387515:44387671:+	C21orf33	ENSG00000160221	0.93	0.82	0.91	0.94	0.9	0.9	TRUE	TRUE	TRUE	TRUE	TRUE	GGCCTTTTGTCTCCCGGTAGGAG	G
chr22:18687162:18687322:-@chr22:18683642:18683742:-@chr22:18682859:18682999:-	DGCR6L	ENSG00000128185	0.82	0.54	0.81	0.77	0.73	0.71	TRUE	TRUE	TRUE	TRUE	TRUE	CGGGCTCTCATCCCTCCCAGTGC	T
chr22:22996866:22996951:+@chr22:23002668:23002771:+@chr22:23028163:23028352:+	ADORA2A	ENSG00000128271	0.2	0.07	0.18	0.17	0.19	0.28	TRUE	TRUE	TRUE	TRUE	TRUE	TCTTCCTCTCTCTCTTCTAGTGT	T
chr22:28004019:28004205:+@chr22:28008379:28008546:+@chr22:28012912:28013123:+	EWSR1	ENSG00000182944	0.98	0.86	0.95	0.93	0.96	0.95	TRUE	TRUE	TRUE	TRUE	TRUE	tttattatttCTCCTCTTAGACC	A
chr22:28257820:28257952:-@chr22:28257067:28257099:-@chr22:28255151:28255228:-	THOC5	ENSG00000100296	0.08	0.4	0.23	0.17	0.17	0.14	TRUE	TRUE	TRUE	TRUE	FALSE	CCTCCTGTTTCCATCATCAGCTC	C
chr22:29142223:29142392:+@chr22:29152705:29152832:+@chr22:29154449:29155041:+	AC004832.3-1	ENSG00000209039	0.27	0.48	0.23	0.22	0.23	0.23	TRUE	TRUE	TRUE	TRUE	FALSE	TTAAATGTTCCCTCCCCCAGGCT	G
chr22:45112340:45112505:+@chr22:45117823:45117929:+@chr22:45120983:45121105:+	TRMU	ENSG00000100416	0.69	0.41	0.67	0.59	0.68	0.64	TRUE	TRUE	TRUE	TRUE	TRUE	GTCATTTTCTTTTATTCTAGTGA	T
chr22:45130005:45130149:+@chr22:45130551:45130633:+@chr22:45131403:45131901:+	TRMU	ENSG00000100416	1	0.69	0.99	1	0.99	0.99	TRUE	TRUE	TRUE	TRUE	TRUE	GGCCCCTCTCTTCTACCCAGTGC	T
chr3:121077950:121078045:-@chr3:121068127:121068165:-@chr3:121064956:121065142:-	GSK3B	ENSG00000082701	0.07	0.53	0.15	0.29	0.18	0.19	TRUE	TRUE	TRUE	TRUE	FALSE	CACTGCATTATCATCTTTAGGAT	G
chr3:150209753:150209879:+@chr3:150224530:150224749:+@chr3:150227237:150228146:+	GYG1	ENSG00000163754	0.95	0.81	0.91	0.95	0.92	0.9	TRUE	TRUE	TRUE	TRUE	TRUE	AACTTGCGTTCACTTGGCAGGTT	G
chr3:182170640:182170840:+@chr3:182175795:182175886:+@chr3:182176604:182183233:+	FXR1	ENSG00000114416	0.36	0.21	0.41	0.5	0.49	0.41	TRUE	TRUE	TRUE	TRUE	TRUE	TTTTTTCTCATCTTTAACAGTCA	T
chr3:32733650:32733733:+@chr3:32736610:32736727:+@chr3:32741946:32742095:+	CNOT10	ENSG00000182973	0.9	0.76	0.91	0.91	0.92	0.92	TRUE	TRUE	TRUE	TRUE	TRUE	CTTTTATATTTTCTCTACAGTCC	T
chr3:52537693:52537748:-@chr3:52537502:52537595:-@chr3:52537239:52537367:-	NT5DC2	ENSG00000168268	0.92	0.77	0.96	0.93	0.92	0.89	TRUE	TRUE	TRUE	TRUE	TRUE	GGTATCTTGGGCCTGCTCAGGGG	G
chr3:58110617:58110769:+@chr3:58110872:58110994:+@chr3:58114142:58114408:+	FLNB	ENSG00000136068	0.99	0.79	0.95	0.94	0.97	0.91	TRUE	TRUE	TRUE	TRUE	TRUE	AGCCTTCTTGGGTCTTGCAGGGA	G
chr3:69212175:69212214:-@chr3:69211953:69211994:-@chr3:69209639:69209759:-	UBA3	ENSG00000144744	0.76	0.5	0.87	0.84	0.98	0.68	TRUE	TRUE	TRUE	TRUE	TRUE	TCTTTTATTCTCTCTTTTAGGGA	G
chr3:73129918:73129999:+@chr3:73179027:73179197:+@chr3:73190878:73190971:+	PPP4R2	ENSG00000163605	0.92	0.81	0.94	0.97	0.93	0.92	TRUE	TRUE	TRUE	TRUE	TRUE	ttttaattttttGCTTATAGGAT	G
chr4:154004208:154004316:+@chr4:154011355:154011450:+@chr4:154013054:154013166:+	ARFIP1	ENSG00000164144	0.17	0.37	0.1	0.19	0.16	0.06	TRUE	TRUE	TRUE	TRUE	FALSE	TAAAATGTCTACCTTTTCAGGTT	G
chr4:17425574:17425719:+@chr4:17425995:17426079:+@chr4:17427982:17428174:+	HCAP-G	ENSG00000109805	0.92	0.73	0.96	0.98	1	0.87	TRUE	TRUE	TRUE	TRUE	TRUE	CTTTATAAATTATTTTTAAGGTT	G
chr4:2897539:2897637:+@chr4:2898167:2898200:+@chr4:2899696:2901587:+	ADD1	ENSG00000087274	0.09	0.56	0.25	0.28	0.25	0.32	TRUE	TRUE	TRUE	TRUE	FALSE	TGTGGCTGCGTCACAAGCAGGAG	G
chr4:39452849:39452948:+@chr4:39455697:39455825:+@chr4:39456375:39460805:+	UBE2K	ENSG00000078140	0.97	0.76	0.95	0.91	0.91	0.88	TRUE	TRUE	TRUE	TRUE	TRUE	CAATTTTTCCCCCCATATAGTAC	T
chr4:83567367:83567481:-@chr4:83566640:83566810:-@chr4:83566214:83566306:-	HNRPDL	ENSG00000152795	0.94	0.75	0.9	0.9	0.93	0.89	TRUE	TRUE	TRUE	TRUE	TRUE	ATCATTGTGCATTGTTTCAGGTC	G
chr5:110487402:110487521:+@chr5:110487705:110487786:+@chr5:110489205:110489392:+	WDR36	ENSG00000134987	0.91	0.44	0.86	0.77	0.84	0.7	TRUE	TRUE	TRUE	TRUE	TRUE	TGTATTTGTTTTTGTTTAAGTCT	T
chr5:134152102:134152180:+@chr5:134153695:134153811:+@chr5:134154059:134154141:+	DDX46	ENSG00000145833	0.11	0.3	0.06	0.09	0.1	0.08	TRUE	TRUE	TRUE	TRUE	FALSE	TCTAATATGTTTTTTTCTAGGTG	G
chr5:137531522:137531666:-@chr5:137530106:137530198:-@chr5:137529416:137529696:-	BRD8	ENSG00000112983	0.77	0.49	0.69	0.68	0.72	0.64	TRUE	TRUE	TRUE	TRUE	TRUE	ACTTGTGCCACCCCCTGTAGAGT	A
chr5:137532810:137532946:-@chr5:137532058:137532276:-@chr5:137531522:137531666:-	BRD8	ENSG00000112983	0.88	0.62	0.84	0.9	0.86	0.76	TRUE	TRUE	TRUE	TRUE	TRUE	GGTTCTCTGTTGTCTCTTAGGTA	G
chr5:7923883:7924036:+@chr5:7926486:7926639:+@chr5:7928371:7928488:+	MTRR	ENSG00000124275	0.68	0.24	0.47	0.55	0.5	0.68	TRUE	TRUE	TRUE	TRUE	TRUE	TTGATATCCTTGTTTTGTAGTAT	T
chr6:127643069:127643178:+@chr6:127648888:127649015:+@chr6:127649454:127651398:+	RNF146	ENSG00000118518	0.45	0.15	0.43	0.54	0.52	0.39	TRUE	TRUE	TRUE	TRUE	TRUE	TTTTTCTTCTTCCTCTTCAGGGG	G
chr6:139292807:139292928:-@chr6:139289231:139289311:-@chr6:139283867:139283954:-	REPS1	ENSG00000135597	0.91	0.71	0.87	0.88	0.89	0.87	TRUE	TRUE	TRUE	TRUE	TRUE	TCTCTCCTCTGTCTGTTCAGCAG	C
chr6:43553803:43553948:+@chr6:43554375:43554434:+@chr6:43573597:43573693:+	RP3-337H4.1	ENSG00000137221	0.25	0.06	0.17	0.37	0.19	0.2	TRUE	TRUE	TRUE	TRUE	TRUE	CGTGTTCACTGACCATTTAGGTA	G
chr6:43595991:43596143:+@chr6:43596341:43596490:+@chr6:43596648:43596764:+	POLR1C	ENSG00000171453	0.95	0.79	0.92	0.91	0.88	0.89	TRUE	TRUE	TRUE	TRUE	TRUE	CGTTCCCTCTTCCTCTCCAGGCA	G
chr6:43751209:43751332:-@chr6:43750917:43750986:-@chr6:43747020:43747621:-	MRPS18A	ENSG00000096080	0.85	0.53	0.85	0.89	0.89	0.81	TRUE	TRUE	TRUE	TRUE	TRUE	CCCTCTTCCCCGCCACTCAGGTC	G
chr7:100751672:100751750:-@chr7:100748125:100748214:-@chr7:100746341:100746543:-	RABL5	ENSG00000128581	0.85	0.51	0.74	0.74	0.74	0.75	TRUE	TRUE	TRUE	TRUE	TRUE	GCTCTTCTTTTTCCTTTTAGGAT	G
chr7:134729210:134729707:-@chr7:134699146:134699358:-@chr7:134697087:134698478:-	CNOT4	ENSG00000080802	0.53	0.81	0.46	0.52	0.61	0.48	TRUE	TRUE	TRUE	TRUE	FALSE	TTTGTTGGTAAATCTCCCAGACA	A
chr7:38221154:38221231:+@chr7:38223151:38223204:+@chr7:38223314:38223431:+	STARD3NL	ENSG00000010270	0.79	0.47	0.66	0.72	0.73	0.65	TRUE	TRUE	TRUE	TRUE	TRUE	CTGGATTATGTGTCTTGCAGTTG	T
chr7:43645573:43645805:-@chr7:43637136:43637906:-@chr7:43614622:43615765:-	C7orf44	ENSG00000106603	0.27	0.14	0.39	0.38	0.35	0.54	TRUE	TRUE	TRUE	TRUE	TRUE	ttgtatttggtttattgcagtgg	t
chr7:43645573:43645805:-@chr7:43637308:43637906:-@chr7:43614622:43615765:-	C7orf44	ENSG00000106603	0.3	0.17	0.44	0.41	0.37	0.59	TRUE	TRUE	TRUE	TRUE	TRUE	ttgtatttggtttattgcagtgg	t
chr8:128875961:128876162:+@chr8:128936583:128936747:+@chr8:128972017:128972426:+	hsa-mir-1204	ENSG00000221315	0.03	0.21	0.07	0.07	0.08	0.1	TRUE	TRUE	TRUE	TRUE	FALSE	CTGCTGGAATCTTCCCTAAGGAC	G
chr8:144740042:144740165:-@chr8:144739532:144739603:-@chr8:144734542:144734641:-	EEF1D	ENSG00000104529	0.86	0.74	0.87	0.9	0.92	0.84	TRUE	TRUE	TRUE	TRUE	TRUE	TCTTTCTGCACTGTCTGCAGGAG	G
chr9:126973185:126973280:-@chr9:126962941:126963006:-@chr9:126960341:126960482:-	PPP6C	ENSG00000119414	0.94	0.68	0.89	0.9	0.88	0.81	TRUE	TRUE	TRUE	TRUE	TRUE	GTATTGCATTTCTTTTATAGTTT	T
chr9:133394336:133394478:-@chr9:133394152:133394246:-@chr9:133391137:133391185:-	UCK1	ENSG00000130717	0.92	0.52	0.83	0.91	0.87	0.81	TRUE	TRUE	TRUE	TRUE	TRUE	CCTGCCCCTTGCCGCTGCAGTTC	T
chr9:36562859:36563004:+@chr9:36571641:36571736:+@chr9:36579533:36579649:+	MELK	ENSG00000165304	0.82	0.67	0.87	0.93	0.95	0.83	TRUE	TRUE	TRUE	TRUE	TRUE	ATGTACTCTCTGTCTTCTAGGTT	G
chrX:102396662:102396777:-@chrX:102396189:102396261:-@chrX:102394579:102395601:-	TCEAL8	ENSG00000180964	0.84	0.65	0.82	0.84	0.85	0.79	TRUE	TRUE	TRUE	TRUE	TRUE	ACACTCCCATCTGTCTGCAGGAT	G
chrX:102826265:102826313:-@chrX:102820083:102820184:-@chrX:102817082:102818635:-	MORF4L2	ENSG00000123562	0.7	0.59	0.78	0.72	0.83	0.9	TRUE	TRUE	TRUE	TRUE	TRUE	ATACCTGCCTTTCTTTCTAGGTT	G
chrX:153281338:153281476:+@chrX:153281999:153282161:+@chrX:153282237:153283874:+	RPL10	ENSG00000147403	0.92	0.73	0.87	0.88	0.88	0.85	TRUE	TRUE	TRUE	TRUE	TRUE	CTTGCACTACCCCAATGTAGGCT	G
chrX:153295013:153295098:+@chrX:153295632:153295721:+@chrX:153301076:153301156:+	TAZ	ENSG00000102125	0.29	0.06	0.18	0.42	0.39	0.21	TRUE	TRUE	TRUE	TRUE	TRUE	gattgctccttcctctgcaggag	g
chrX:154772315:154772469:+@chrX:154778480:154778537:+@chrX:154780970:154781107:+	VAMP7	ENSG00000124333	0.81	0.49	0.76	0.84	0.81	0.82	TRUE	TRUE	TRUE	TRUE	TRUE	TTATATCTTTTATTCTACAGTTA	T
chrX:1678085:1678325:+@chrX:1679031:1679100:+@chrX:1679552:1681411:+	CXYorf3	ENSG00000197976	0.14	0.03	0.14	0.34	0.18	0.12	TRUE	TRUE	TRUE	TRUE	TRUE	AACCTGTTGTCTGATTACAGTTG	T
chrX:47394766:47394947:-@chrX:47394264:47394369:-@chrX:47385575:47385818:-	ELK1	ENSG00000126767	0.41	0.18	0.51	0.42	0.65	0.35	TRUE	TRUE	TRUE	TRUE	TRUE	AGTGTTTGGATTTCTCCTAGCCT	C
chrY:1678085:1678325:+@chrY:1679031:1679100:+@chrY:1679552:1681411:+	N/A	N/A	0.14	0.03	0.14	0.35	0.18	0.11	TRUE	TRUE	TRUE	TRUE	TRUE	AACCTGTTGTCTGATTACAGTTG	T
chrY:57631515:57631669:+@chrY:57637680:57637737:+@chrY:57640170:57640307:+	N/A	N/A	0.81	0.49	0.76	0.84	0.81	0.82	TRUE	TRUE	TRUE	TRUE	TRUE	TTATATCTTTTATTCTACAGTTA	T
chr1:14601:14754:-@chr1:8776:9002:-@chr1:8131:8242:-	AL627309.15-1	ENSG00000146556	0.6	0.72	0.53	0.67	0.64	0.77	TRUE	FALSE	FALSE	FALSE	FALSE	CATCAGAGTTAACTTTGCAGTGA	T
chr1:19796058:19796190:+@chr1:19816339:19816417:+@chr1:19821181:19821228:+	RP5-1056L3.3	ENSG00000218307	0.12	0.37	0.22	0.25	0.33	0.32	TRUE	FALSE	FALSE	FALSE	FALSE	TGTTTGCTTGTTCTAATCAGAAT	A
chr1:211022337:211022391:-@chr1:210979499:210979566:-@chr1:210966118:210978651:-	NSL1	ENSG00000117697	0.94	0.78	0.89	0.69	0.88	0.55	TRUE	FALSE	FALSE	FALSE	TRUE	GTTTGGCAATGTTTTTGCAGCCC	C
chr1:229542138:229542237:+@chr1:229550166:229550294:+@chr1:229553673:229553940:+	C1orf124	ENSG00000010072	0.98	0.87	0.97	0.86	0.92	0.92	TRUE	FALSE	FALSE	FALSE	TRUE	TTGAATATTTTATGTTCCAGACC	A
chr1:43603444:43603634:-@chr1:43603186:43603266:-@chr1:43602996:43603052:-	ELOVL1	ENSG00000066322	0.96	0.85	0.98	0.93	0.94	0.93	TRUE	FALSE	FALSE	FALSE	TRUE	TAATCCACATCCCTTCCCAGTTC	T
chr1:44209225:44209448:+@chr1:44209646:44210329:+@chr1:44210417:44210593:+	DPH2	ENSG00000132768	0.97	0.74	0.89	0.69	0.73	0.82	TRUE	FALSE	FALSE	FALSE	TRUE	ACTACCTCCTTCTCTTCCAGAGG	A
chr1:63692177:63692233:-@chr1:63685065:63685115:-@chr1:63679050:63679362:-	ITGB3BP	ENSG00000142856	0.97	0.83	0.96	0.79	0.89	0.8	TRUE	FALSE	FALSE	FALSE	TRUE	ACCTTTCTTCTTTCATATAGCAT	C
chr10:104850792:104850849:-@chr10:104850410:104850690:-@chr10:104849673:104849766:-	NT5C2	ENSG00000076685	0.16	0.03	0.15	0.09	0.04	0.05	TRUE	FALSE	FALSE	FALSE	TRUE	TCTTTTCTGCTTTTCTAAAGTGA	T
chr10:124176448:124176537:+@chr10:124177782:124177926:+@chr10:124179130:124181856:+	PLEKHA1	ENSG00000107679	0.25	0.13	0.32	0.09	0.09	0.21	TRUE	FALSE	FALSE	FALSE	TRUE	AGCTTTGCACTGTGTTCCAGATG	A
chr10:79466958:79467068:+@chr10:79469968:79469989:+@chr10:79470379:79470479:+	RPS24	ENSG00000138326	0.24	0.73	0.47	0.62	0.61	0.7	TRUE	FALSE	FALSE	FALSE	FALSE	CTTCCCCGCCACTGATTCAGTGA	T
chr10:92644512:92644628:+@chr10:92645191:92645220:+@chr10:92645617:92645654:+	RPP30	ENSG00000148688	0.9	0.51	0.75	0.23	0.27	0.59	TRUE	FALSE	FALSE	FALSE	TRUE	AGTCACTTTCTATTTTGTAGAAT	A
chr12:44670403:44670668:-@chr12:44654240:44655784:-@chr12:44644157:44644238:-	SFRS2IP	ENSG00000139218	0.05	0.31	0.15	0.19	0.18	0.29	TRUE	FALSE	FALSE	FALSE	FALSE	acctccctgtttctcaacagtat	t
chr12:54483680:54483779:-@chr12:54480905:54480951:-@chr12:54480613:54480680:-	AC073487.34	ENSG00000205323	0.88	0.73	0.89	0.49	0.76	0.55	TRUE	FALSE	FALSE	FALSE	TRUE	AATATTTTAATATTCTTTAGCTG	C
chr12:6709829:6709934:+@chr12:6710096:6710247:+@chr12:6710427:6711291:+	COPS7A	ENSG00000111652	0.99	0.87	0.96	0.93	0.9	0.86	TRUE	FALSE	FALSE	FALSE	TRUE	CATTCCTTTCATCCTGGTAGGTT	G
chr13:113338850:113339016:+@chr13:113340134:113340200:+@chr13:113342436:113343506:+	TFDP1	ENSG00000198176	0.76	0.44	0.63	0.27	0.3	0.58	TRUE	FALSE	FALSE	FALSE	TRUE	TATTTTCTTTCCCTTTTCAGAAA	A
chr14:104982800:104982893:+@chr14:104986741:104986791:+@chr14:104987440:104987566:+	MTA1	ENSG00000182979	0.36	0.18	0.4	0.14	0.29	0.09	TRUE	FALSE	FALSE	FALSE	TRUE	GCTGTCTGTCTGTTATATAGCCC	C
chr14:69895989:69896201:-@chr14:69879128:69879199:-@chr14:69865644:69865706:-	COX16	ENSG00000133983	0.94	0.67	0.84	0.8	0.79	0.74	TRUE	FALSE	FALSE	FALSE	TRUE	GTTTCCTTTCTTTGTTTTAGTTG	T
chr15:38469329:38469422:+@chr15:38470986:38471047:+@chr15:38471442:38471516:+	C15orf23	ENSG00000128944	0.98	0.84	0.96	0.89	0.9	0.84	TRUE	FALSE	FALSE	FALSE	TRUE	GACTTTGTTGTATCCATCAGCTT	C
chr15:47296679:47296802:+@chr15:47315114:47315228:+@chr15:47315340:47315430:+	GALK2	ENSG00000156958	0.07	0.25	0.04	0.24	0.16	0.1	TRUE	FALSE	FALSE	FALSE	FALSE	TTGTTTCCTCTGTGTTTCAGGAA	G
chr15:71712519:71712806:-@chr15:71676416:71676763:-@chr15:71671360:71671531:-	NPTN	ENSG00000156642	0.01	0.2	0.09	0.11	0.13	0.12	TRUE	FALSE	FALSE	FALSE	FALSE	CCTGCTCCCCCTCCCTCTAGCTG	C
chr16:19442680:19442911:+@chr16:19444542:19444684:+@chr16:19446690:19446845:+	AC012621.2	ENSG00000103540	0.62	0.75	0.52	0.65	0.69	0.64	TRUE	FALSE	FALSE	FALSE	FALSE	tattcaatacttttatcaagtgc	t
chr16:45700895:45701123:-@chr16:45677638:45677751:-@chr16:45672943:45675213:-	NETO2	ENSG00000171208	0.85	0.57	0.78	0.56	0.65	0.44	TRUE	FALSE	FALSE	FALSE	TRUE	ACTGTTTTCTCTTCCTGCAGCTC	C
chr16:68569481:68569516:-@chr16:68568215:68569407:-@chr16:68567703:68568136:-	PDXDC2	ENSG00000196696	0.27	0.14	0.32	0.17	0.19	0.2	TRUE	FALSE	FALSE	FALSE	TRUE	ATACATTTTTCTCCCTACAGCTC	C
chr16:83324542:83324610:+@chr16:83331416:83331476:+@chr16:83335740:83336780:+	USP10	ENSG00000103194	0.9	0.74	0.9	0.53	0.8	0.6	TRUE	FALSE	FALSE	FALSE	TRUE	TTTTCTGATTCCTTGTGCAGCTT	C
chr17:27559239:27559441:+@chr17:27562248:27562370:+@chr17:27575748:27576859:+	RHOT1	ENSG00000126858	0.33	0.03	0.21	0.04	0.15	0.06	TRUE	FALSE	FALSE	FALSE	TRUE	CCTTCTGTGTGTTTTCGCAGCCA	C
chr17:5312615:5312905:-@chr17:5307573:5307733:-@chr17:5306363:5306590:-	DHX33	ENSG00000005100	0.82	0.7	0.84	0.75	0.81	0.81	TRUE	FALSE	FALSE	FALSE	TRUE	TTTTTCCCCCTCTCTCCTAGGGG	G
chr17:72065441:72065534:+@chr17:72066622:72066720:+@chr17:72068965:72069075:+	SNORD1C	ENSG00000204303	0.22	0.11	0.2	0.03	0.06	0.08	TRUE	FALSE	FALSE	FALSE	TRUE	CTGTTATCCTTCTCTTTTAGATT	A
chr19:12919991:12920172:+@chr19:12920311:12920366:+@chr19:12920500:12920627:+	RAD23A	ENSG00000179262	0.71	0.53	0.72	0.29	0.59	0.4	TRUE	FALSE	FALSE	FALSE	TRUE	TCTCTCTCTTGAATTTGCAGCTC	C
chr19:12919991:12920172:+@chr19:12920328:12920366:+@chr19:12920500:12920627:+	RAD23A	ENSG00000179262	0.39	0.28	0.43	0.18	0.26	0.15	TRUE	FALSE	FALSE	FALSE	TRUE	CAGCTCTGTTCCCTCTTCAGGTA	G
chr19:13081972:13082120:-@chr19:13081729:13081815:-@chr19:13081583:13081652:-	TRMT1	ENSG00000104907	0.48	0.27	0.54	0.23	0.25	0.14	TRUE	FALSE	FALSE	FALSE	TRUE	GCCACTGGTACCCCCCACAGCAA	C
chr19:19168772:19168855:+@chr19:19168995:19169060:+@chr19:19169330:19169430:+	RFXANK	ENSG00000064490	0.59	0.42	0.61	0.24	0.53	0.24	TRUE	FALSE	FALSE	FALSE	TRUE	CTGCCTCTGTCCTGCCCCAGCCC	C
chr2:24869754:24869874:+@chr2:24870225:24870338:+@chr2:24876048:24876217:+	CENPO	ENSG00000138092	0.69	0.48	0.68	0.28	0.52	0.37	TRUE	FALSE	FALSE	FALSE	TRUE	TGCCATTTTTCTTTTATTAGCAA	C
chr20:43482582:43482747:+@chr20:43483437:43483637:+@chr20:43486270:43486435:+	PIGT	ENSG00000124155	0.98	0.86	0.95	0.82	0.88	0.9	TRUE	FALSE	FALSE	FALSE	TRUE	GTTGATATTTCTTTACACAGAGG	A
chr20:5944007:5944136:+@chr20:5959931:5960016:+@chr20:5960658:5960726:+	CRLS1	ENSG00000088766	1	0.89	0.96	0.95	0.95	0.93	TRUE	FALSE	FALSE	FALSE	TRUE	ATTTTATGTTTGATTTTCAGTTC	T
chr3:137722745:137722949:-@chr3:137719780:137719947:-@chr3:137704160:137704311:-	STAG1	ENSG00000118007	0.15	0.44	0.22	0.42	0.33	0.28	TRUE	FALSE	FALSE	FALSE	FALSE	CATTTTTATTCACTTTGCAGGAC	G
chr3:23978472:23979100:+@chr3:23979719:23979825:+@chr3:23981472:23981657:+	NR1D2	ENSG00000174738	0.1	0.24	0.07	0.14	0.21	0.12	TRUE	FALSE	FALSE	FALSE	FALSE	TACGACATTCTACATCAAAGTAC	T
chr5:112226104:112226179:+@chr5:112228030:112228124:+@chr5:112228217:112228328:+	SRP19	ENSG00000153037	0.99	0.83	0.96	0.85	0.92	0.65	TRUE	FALSE	FALSE	FALSE	TRUE	CTTAAAGCACATATATTTAGTGT	T
chr5:112226104:112226179:+@chr5:112228053:112228124:+@chr5:112228217:112228328:+	SRP19	ENSG00000153037	0.99	0.86	0.97	0.89	0.93	0.69	TRUE	FALSE	FALSE	FALSE	TRUE	TTATGTTTTTAACTGTTCAGGCT	G
chr5:175719420:175719527:-@chr5:175719090:175719176:-@chr5:175715180:175715358:-	KIAA1191	ENSG00000122203	0.51	0.72	0.49	0.78	0.63	0.79	TRUE	FALSE	FALSE	FALSE	FALSE	GCCCTTTGTTATTTTATTAGGTG	G
chr5:177978163:177978385:-@chr5:177976951:177977041:-@chr5:177976489:177976555:-	CLK4	ENSG00000113240	0.67	0.78	0.6	0.75	0.78	0.84	TRUE	FALSE	FALSE	FALSE	FALSE	CTGCCCACTTGCCGTTCCAGAAG	A
chr5:68506980:68507120:+@chr5:68508822:68508932:+@chr5:68509107:68509826:+	CCNB1	ENSG00000134057	0.99	0.87	0.94	0.78	0.8	0.92	TRUE	FALSE	FALSE	FALSE	TRUE	ACATTAACTTGTTGCCTTAGACA	A
chr5:70274301:70274453:+@chr5:70276241:70276336:+@chr5:70277649:70277759:+	SMN1	ENSG00000172062	0.94	0.81	0.89	0.86	0.87	0.71	TRUE	FALSE	FALSE	FALSE	TRUE	CTTTGAAATATTCCTTATAGCCA	C
chr6:109803970:109804008:-@chr6:109798307:109798363:-@chr6:109794416:109796913:-	CD164	ENSG00000135535	0.93	0.56	0.81	0.41	0.74	0.29	TRUE	FALSE	FALSE	FALSE	TRUE	ACATTTTGTTTTCATTCCAGCTA	C
chr6:135663331:135663389:-@chr6:135653254:135653356:-@chr6:135646817:135648478:-	AHI1	ENSG00000135541	0.78	0.92	0.75	0.88	0.85	0.78	TRUE	FALSE	FALSE	FALSE	FALSE	CTGATCTTTCCCTCCTATAGTTC	T
chr6:149960336:149960470:-@chr6:149959892:149960018:-@chr6:149957865:149958063:-	KATNA1	ENSG00000186625	0.96	0.77	0.91	0.76	0.85	0.67	TRUE	FALSE	FALSE	FALSE	TRUE	AAATTTGTTTCTACCATTAGCAA	C
chr6:91285698:91285759:-@chr6:91284887:91285002:-@chr6:91282074:91283121:-	MAP3K7	ENSG00000135341	0.95	0.46	0.78	0.39	0.66	0.31	TRUE	FALSE	FALSE	FALSE	TRUE	ACATTCCTGATTATTTTCAGCCT	C
chr7:102514313:102514447:+@chr7:102524960:102525031:+@chr7:102525982:102527441:+	ARMC10	ENSG00000170632	0.92	0.61	0.79	0.72	0.67	0.58	TRUE	FALSE	FALSE	FALSE	TRUE	CCAGTATCATCTTCTTTCAGGTG	G
chr9:14851:15004:-@chr9:9026:9252:-@chr9:8381:8492:-	AL928970.15-2	ENSG00000185871	0.63	0.74	0.55	0.68	0.66	0.78	TRUE	FALSE	FALSE	FALSE	FALSE	CATCAGAGTTAACTTTGCAGTGA	T
chrX:133858513:133858730:-@chrX:133853175:133853336:-@chrX:133849328:133850888:-	MOSPD1	ENSG00000101928	0.89	0.63	0.8	0.41	0.39	0.76	TRUE	FALSE	FALSE	FALSE	TRUE	GGATTTTTGTCTTTTTACAGAAA	A
chrX:48644151:48644263:+@chrX:48644440:48644738:+@chrX:48644953:48645016:+	PQBP1	ENSG00000102103	0.82	0.65	0.76	0.31	0.29	0.73	TRUE	FALSE	FALSE	FALSE	TRUE	TGGCAAGAGGTCACTTCAAGACT	A
chrX:53475661:53475789:-@chrX:53475471:53475579:-@chrX:53474931:53475267:-	HSD17B10	ENSG00000072506	0.93	0.83	0.9	0.86	0.88	0.86	TRUE	FALSE	FALSE	FALSE	TRUE	GACTTCTACTCTTTCTCCAGGTT	G
chrX:53475661:53475789:-@chrX:53475498:53475579:-@chrX:53474931:53475267:-	HSD17B10	ENSG00000072506	0.8	0.65	0.74	0.68	0.72	0.66	TRUE	FALSE	FALSE	FALSE	TRUE	GACTTCTACTCTTTCTCCAGGTT	G
chr1:14601:14754:-@chr1:8776:9002:-@chr1:8131:8229:-	AL627309.15-1	ENSG00000146556	0.39	0.59	0.42	0.5	0.48	0.72	TRUE	FALSE	TRUE	FALSE	FALSE	CATCAGAGTTAACTTTGCAGTGA	T
chr1:149266333:149266427:+@chr1:149267886:149268044:+@chr1:149272906:149274813:+	PRUNE	ENSG00000143363	0.77	0.43	0.67	0.58	0.62	0.48	TRUE	FALSE	TRUE	FALSE	TRUE	CTCCGTTTCTTCCCTTTCAGGCC	G
chr1:151881346:151881529:+@chr1:151882327:151882464:+@chr1:151884164:151884603:+	C1orf77	ENSG00000160679	0.88	0.76	0.85	0.81	0.86	0.71	TRUE	FALSE	TRUE	FALSE	TRUE	TTGTATGCCTCCTCTCTAAGGTC	G
chr1:19796058:19796190:+@chr1:19821181:19821228:+@chr1:19822555:19822664:+	RP5-1056L3.3	ENSG00000218307	0.94	0.83	0.9	0.87	0.9	0.85	TRUE	FALSE	TRUE	FALSE	TRUE	TTTTTTCTCCCTCTTTGTAGGTA	G
chr1:206025587:206025650:+@chr1:206030221:206030313:+@chr1:206033487:206035481:+	CD46	ENSG00000117335	0.34	0.18	0.45	0.13	0.33	0.13	TRUE	FALSE	TRUE	FALSE	TRUE	TTTTCTCTTCCTCTGTTCAGCAC	C
chr1:233390831:233391005:-@chr1:233390449:233390585:-@chr1:233384819:233385050:-	RBM34	ENSG00000188739	0.84	0.49	0.83	0.42	0.79	0.48	TRUE	FALSE	TRUE	FALSE	TRUE	AACTTCAAACTTTTAAAAAGCAA	C
chr1:240080334:240080511:+@chr1:240082217:240082336:+@chr1:240083283:240083406:+	EXO1	ENSG00000174371	0.92	0.78	0.9	0.86	0.89	0.79	TRUE	FALSE	TRUE	FALSE	TRUE	GTTTTTCTTTTTTTCCATAGGTA	G
chr1:26645394:26645510:+@chr1:26646637:26646738:+@chr1:26656869:26656983:+	DHDDS	ENSG00000117682	0.88	0.76	0.93	0.9	0.94	0.82	TRUE	FALSE	TRUE	FALSE	TRUE	TTCTCTTCTTCCCTCCTCAGGTG	G
chr1:28759732:28759831:+@chr1:28760212:28760359:+@chr1:28760445:28760497:+	TRNAU1AP	ENSG00000180098	0.45	0.25	0.43	0.37	0.43	0.32	TRUE	FALSE	TRUE	FALSE	TRUE	GCATTCTGCTCTTCCCACAGTTA	T
chr1:44988701:44988823:+@chr1:44991391:44991513:+@chr1:44991992:44992092:+	KIF2C	ENSG00000142945	0.88	0.6	0.79	0.59	0.76	0.29	TRUE	FALSE	TRUE	FALSE	TRUE	TGACTCTTGTTCCCCTACAGCTG	C
chr1:52030306:52030358:-@chr1:52029838:52029921:-@chr1:52029160:52029250:-	NRD1	ENSG00000078618	0.96	0.82	0.95	0.9	0.96	0.91	TRUE	FALSE	TRUE	FALSE	TRUE	CTTTTCTCTCTGGCTTGTAGGTA	G
chr1:52502033:52502132:+@chr1:52504915:52505091:+@chr1:52506723:52506892:+	ZFYVE9	ENSG00000157077	0.82	0.64	0.9	0.73	0.82	0.55	TRUE	FALSE	TRUE	FALSE	TRUE	TGTGTCTGTATTTGCTTTAGCTC	C
chr1:53473837:53473895:-@chr1:53471802:53471912:-@chr1:53467132:53467214:-	MAGOH	ENSG00000162385	0.71	0.49	0.66	0.6	0.64	0.39	TRUE	FALSE	TRUE	FALSE	TRUE	GTTTTTTAACTTGCGTTCAGGCT	G
chr1:68722221:68722361:-@chr1:68720317:68721168:-@chr1:68719711:68719883:-	DEPDC1	ENSG00000024526	0.47	0.14	0.44	0.29	0.35	0.27	TRUE	FALSE	TRUE	FALSE	TRUE	TTTGTTTCATTTCCTGGTAGTTG	T
chr1:87118933:87118996:-@chr1:87106324:87106373:-@chr1:87100716:87101876:-	RP4-604K5.1	ENSG00000183291	0.86	0.75	0.85	0.78	0.84	0.66	TRUE	FALSE	TRUE	FALSE	TRUE	TTTTTTTCTTTTTTTATAAGCTT	C
chr10:105146156:105146260:-@chr10:105145493:105145779:-@chr10:105142118:105142213:-	hsa-mir-1307	ENSG00000221767	0.3	0.12	0.33	0.21	0.38	0.09	TRUE	FALSE	TRUE	FALSE	TRUE	TTTCTTCTGTATGTCCATAGCTG	C
chr10:99195479:99195594:-@chr10:99192984:99193058:-@chr10:99190918:99191006:-	EXOSC1	ENSG00000171311	0.9	0.63	0.86	0.29	0.87	0.52	TRUE	FALSE	TRUE	FALSE	TRUE	TTTTGTTGTTCCCTCTGTAGCTT	C
chr11:10780172:10780332:-@chr11:10779784:10779897:-@chr11:10779085:10779210:-	EIF4G2	ENSG00000110321	0.83	0.63	0.75	0.72	0.79	0.71	TRUE	FALSE	TRUE	FALSE	TRUE	TTTCTCCTTTTCTGAAATAGGGG	G
chr11:13441215:13441414:-@chr11:13423147:13423276:-@chr11:13399765:13399961:-	BTBD10	ENSG00000148925	0.34	0.5	0.26	0.44	0.32	0.4	TRUE	FALSE	TRUE	FALSE	FALSE	TGCTACATGTGTGCTTTCAGAGC	A
chr11:64300546:64300674:-@chr11:64297478:64297553:-@chr11:64294304:64294456:-	SF1	ENSG00000168066	0.73	0.98	0.79	0.88	0.72	0.86	TRUE	FALSE	TRUE	FALSE	FALSE	CCTAACCTGGTTTCTTCCAGTGC	T
chr11:67709824:67709971:-@chr11:67704175:67704243:-@chr11:67699061:67699226:-	SUV420H1	ENSG00000110066	0.86	0.55	0.73	0.5	0.89	0.49	TRUE	FALSE	TRUE	FALSE	TRUE	TTGTTTTTGCATTTATATAGCGC	C
chr12:110392295:110392427:-@chr12:110386849:110386902:-@chr12:110379401:110379546:-	ATXN2	ENSG00000204842	0.36	0.17	0.35	0.1	0.36	0.15	TRUE	FALSE	TRUE	FALSE	TRUE	TTTCTATTTCCCAAATTCAGCAT	C
chr12:111012913:111013051:-@chr12:111009870:111009988:-@chr12:111003247:111003321:-	C12orf30	ENSG00000111300	0.85	0.65	0.95	0.34	0.89	0.56	TRUE	FALSE	TRUE	FALSE	TRUE	CTTATTTCTCTTTATCTTAGCGG	C
chr12:112107938:112108209:+@chr12:112108373:112108504:+@chr12:112108871:112109236:+	C12orf52	ENSG00000139405	0.98	0.87	0.95	0.93	0.98	0.93	TRUE	FALSE	TRUE	FALSE	TRUE	tttcacttccaccgttttagctt	c
chr12:121571885:121571928:-@chr12:121571004:121571081:-@chr12:121569339:121569551:-	RSRC2	ENSG00000111011	0.22	0.1	0.32	0.06	0.42	0.06	TRUE	FALSE	TRUE	FALSE	TRUE	CTATAATAAATCATACTCAGCGT	C
chr12:52393151:52393257:-@chr12:52392826:52392897:-@chr12:52391169:52392172:-	CALCOCO1	ENSG00000012822	0.15	0.01	0.1	0.01	0.28	0.01	TRUE	FALSE	TRUE	FALSE	TRUE	TGGCTTCTATGTTGTTCTAGCAC	C
chr12:6704041:6704245:+@chr12:6707353:6707428:+@chr12:6707650:6707738:+	COPS7A	ENSG00000111652	0.77	0.43	0.75	0.37	0.7	0.37	TRUE	FALSE	TRUE	FALSE	TRUE	CTTTTTCCTCATTCTCGCAGCTG	C
chr12:74740185:74740326:-@chr12:74739845:74739925:-@chr12:74736080:74736208:-	NAP1L1	ENSG00000187109	0.98	0.87	0.96	0.78	0.95	0.78	TRUE	FALSE	TRUE	FALSE	TRUE	TTTTTTTTAAATCATTTTAGCGA	C
chr12:86953399:86953646:+@chr12:86958056:86958173:+@chr12:86960733:86960828:+	C12orf29	ENSG00000133641	0.62	0.32	0.53	0.21	0.67	0.21	TRUE	FALSE	TRUE	FALSE	TRUE	TCTCTCTCTCTTTTTTTAAGCCA	C
chr12:99125572:99125695:+@chr12:99127982:99128117:+@chr12:99128204:99128260:+	ACTR6	ENSG00000075089	0.97	0.75	0.96	0.53	0.95	0.54	TRUE	FALSE	TRUE	FALSE	TRUE	TTTTATCTTTTTTTAAATAGCTG	C
chr13:20630061:20630264:-@chr13:20627832:20627950:-@chr13:20625734:20627289:-	C13orf3	ENSG00000165480	0.86	0.55	0.82	0.56	0.81	0.61	TRUE	FALSE	TRUE	FALSE	TRUE	ATTTCCTTTTTTTTTTTTAGCTT	C
chr14:55209400:55209483:+@chr14:55209643:55209726:+@chr14:55212306:55212389:+	KTN1	ENSG00000126777	0.28	0.17	0.27	0.1	0.43	0.21	TRUE	FALSE	TRUE	FALSE	TRUE	AACTCTAAACTTCATTGCAGCTG	C
chr14:72818820:72818966:-@chr14:72815742:72815885:-@chr14:72811671:72813754:-	NUMB	ENSG00000133961	0.79	0.35	0.71	0.2	0.68	0.11	TRUE	FALSE	TRUE	FALSE	TRUE	GTTGTCTGCTCCCGTTGTAGCTA	C
chr14:73457436:73457561:+@chr14:73458522:73458662:+@chr14:73459851:73459978:+	ZNF410	ENSG00000119725	0.6	0.16	0.48	0.11	0.63	0.13	TRUE	FALSE	TRUE	FALSE	TRUE	ACAACCTATTCTCTGTGCAGCTG	C
chr15:32307186:32307339:+@chr15:32307922:32308082:+@chr15:32309246:32309644:+	TMEM85	ENSG00000128463	0.75	0.59	0.71	0.58	0.76	0.54	TRUE	FALSE	TRUE	FALSE	TRUE	AACTTCTGTTACCGCAACAGCTT	C
chr16:31029223:31029321:+@chr16:31029510:31029583:+@chr16:31029913:31030041:+	BCKDK	ENSG00000103507	0.88	0.73	0.91	0.72	0.91	0.8	TRUE	FALSE	TRUE	FALSE	TRUE	GACCTCCTTTCTCCGGCCAGCCT	C
chr16:54993146:54993256:-@chr16:54980598:54980788:-@chr16:54977332:54977435:-	AMFR	ENSG00000159461	0.95	0.75	0.87	0.48	0.89	0.68	TRUE	FALSE	TRUE	FALSE	TRUE	TCTTTTGGACTTTTTGGTAGCTC	C
chr17:31916586:31916742:+@chr17:31916892:31916923:+@chr17:31922770:31922856:+	ZNHIT3	ENSG00000108278	0.76	0.29	0.58	0.3	0.64	0.25	TRUE	FALSE	TRUE	FALSE	TRUE	TGTGGCCTCTGTTGTTACAGCTG	C
chr17:70777790:70777921:-@chr17:70777023:70777145:-@chr17:70775759:70775868:-	MIF4GD	ENSG00000125457	0.15	0.02	0.15	0.08	0.2	0.06	TRUE	FALSE	TRUE	FALSE	TRUE	TGGTTTCTGTGCTGCCATAGCCC	C
chr17:73678493:73678730:+@chr17:73679186:73679325:+@chr17:73679415:73680604:+	SYNGR2	ENSG00000108639	0.73	0.48	0.69	0.38	0.62	0.41	TRUE	FALSE	TRUE	FALSE	TRUE	CTTCACCCGTCCTCCCCCAGCTC	C
chr17:8051219:8051410:-@chr17:8050783:8050931:-@chr17:8050534:8050682:-	AURKB	ENSG00000178999	0.84	0.55	0.86	0.58	0.9	0.47	TRUE	FALSE	TRUE	FALSE	TRUE	TCCTCTGTCTCTTCCCCCAGCCA	C
chr17:8051219:8051410:-@chr17:8050793:8050931:-@chr17:8050534:8050682:-	AURKB	ENSG00000178999	0.96	0.81	0.97	0.85	0.97	0.73	TRUE	FALSE	TRUE	FALSE	TRUE	TCCTCTGTCTCTTCCCCCAGCCA	C
chr18:43676890:43677178:-@chr18:43650844:43650933:-@chr18:43649612:43649805:-	SMAD2	ENSG00000175387	0.95	0.72	0.89	0.67	0.96	0.72	TRUE	FALSE	TRUE	FALSE	TRUE	GTTTTTCAATTTATGCACAGCAC	C
chr19:16834163:16834370:+@chr19:16834695:16834790:+@chr19:16835491:16835607:+	SIN3B	ENSG00000127511	0.16	0.03	0.19	0.02	0.47	0.04	TRUE	FALSE	TRUE	FALSE	TRUE	CTCAGTGTGTTTCTGTTTAGCTT	C
chr19:45435716:45435838:-@chr19:45434004:45434132:-@chr19:45433637:45433851:-	AKT2	ENSG00000105221	0.99	0.63	0.99	0.34	0.99	0.44	TRUE	FALSE	TRUE	FALSE	TRUE	TCCGTTGACTTTTCCAACAGCTG	C
chr19:852976:853130:-@chr19:852422:852546:-@chr19:851829:851952:-	C19orf22	ENSG00000198858	0.85	0.53	0.75	0.54	0.71	0.33	TRUE	FALSE	TRUE	FALSE	TRUE	GAGCATCTGTTTCCACCTAGCCC	C
chr2:175687664:175687842:-@chr2:175686968:175687082:-@chr2:175684542:175684628:-	ATF2	ENSG00000115966	0.98	0.83	0.95	0.84	0.96	0.81	TRUE	FALSE	TRUE	FALSE	TRUE	TCTTCTTTTGTTTTTCTTAGCCC	C
chr2:190357240:190357342:-@chr2:190355985:190356094:-@chr2:190355393:190355573:-	ORMDL1	ENSG00000128699	0.43	0.14	0.33	0.18	0.39	0.06	TRUE	FALSE	TRUE	FALSE	TRUE	ACACCACATTATGTCAACAGCAT	C
chr2:38827340:38827393:-@chr2:38826790:38826825:-@chr2:38824245:38825833:-	SFRS7	ENSG00000115875	0.86	0.66	0.84	0.69	0.88	0.58	TRUE	FALSE	TRUE	FALSE	TRUE	AATTTCTCATGTTTTGACAGCCG	C
chr2:63675126:63675224:+@chr2:63676061:63676157:+@chr2:63678037:63678212:+	MDH1	ENSG00000014641	0.98	0.86	0.97	0.76	0.95	0.85	TRUE	FALSE	TRUE	FALSE	TRUE	CTGTCCTTGCTATTTGGTAGCCT	C
chr2:96767413:96767531:-@chr2:96766601:96766681:-@chr2:96763873:96763990:-	LMAN2L	ENSG00000114988	0.25	0.12	0.24	0.02	0.34	0.04	TRUE	FALSE	TRUE	FALSE	TRUE	cttctctggaccttttctagctg	c
chr2:99154405:99154541:-@chr2:99154238:99154324:-@chr2:99153432:99153547:-	MITD1	ENSG00000158411	0.87	0.34	0.86	0.28	0.91	0.06	TRUE	FALSE	TRUE	FALSE	TRUE	TCCATTCTAATGTCTTTTAGCTG	C
chr20:21231942:21232111:+@chr20:21254917:21255044:+@chr20:21255128:21255239:+	XRN2	ENSG00000088930	0.98	0.86	0.97	0.78	0.99	0.8	TRUE	FALSE	TRUE	FALSE	TRUE	TAATTATCACTTCCTCATAGCCA	C
chr20:33783277:33783471:-@chr20:33780798:33780863:-@chr20:33780648:33780701:-	RBM39	ENSG00000131051	0.92	0.73	0.86	0.52	0.88	0.72	TRUE	FALSE	TRUE	FALSE	TRUE	ATTTTGTGTTTCCTTTTTAGCTC	C
chr20:57046916:57047084:-@chr20:57045641:57045730:-@chr20:57045140:57045210:-	SLMO2	ENSG00000101166	0.93	0.64	0.81	0.56	0.85	0.51	TRUE	FALSE	TRUE	FALSE	TRUE	GTTCTGAATGTTTTACTTAGCTT	C
chr20:61975465:61975613:+@chr20:61977613:61977672:+@chr20:61984516:61984617:+	TPD52L2	ENSG00000101150	0.32	0.16	0.48	0.15	0.5	0.22	TRUE	FALSE	TRUE	FALSE	TRUE	TGTAGACTTTCTGTTTTTAGCTA	C
chr22:28558234:28558331:-@chr22:28551611:28551769:-@chr22:28551076:28551246:-	ASCC2	ENSG00000100325	0.99	0.76	0.88	0.48	0.88	0.65	TRUE	FALSE	TRUE	FALSE	TRUE	CGTGGTTTTTGGATCCGTAGCAC	C
chr22:36577233:36577443:+@chr22:36581518:36581597:+@chr22:36584632:36584693:+	EIF3EIP	ENSG00000100129	0.91	0.78	0.87	0.7	0.92	0.71	TRUE	FALSE	TRUE	FALSE	TRUE	ATTTTTTTCTTGATTTTTAGCTG	C
chr22:41604998:41605119:-@chr22:41602838:41602960:-@chr22:41602087:41602283:-	PACSIN2	ENSG00000100266	0.91	0.64	0.83	0.41	0.89	0.47	TRUE	FALSE	TRUE	FALSE	TRUE	AAAGCTCTCTCTCTCCATAGCAC	C
chr3:109259014:109259106:-@chr3:109253476:109253507:-@chr3:109244631:109248829:-	CD47	ENSG00000196776	0.72	0.51	0.7	0.41	0.63	0.38	TRUE	FALSE	TRUE	FALSE	TRUE	ttatttgttatttatatCAGCTT	C
chr3:120438390:120438607:-@chr3:120436682:120436764:-@chr3:120431384:120431781:-	B4GALT4	ENSG00000121578	0.16	0.05	0.14	0.05	0.18	0.06	TRUE	FALSE	TRUE	FALSE	TRUE	TTCCTTTCCTTTTGTTATAGCTT	C
chr3:139810232:139810469:+@chr3:139821243:139821302:+@chr3:139822939:139823071:+	FAIM	ENSG00000158234	0.02	0.25	0.05	0.14	0.1	0.16	TRUE	FALSE	TRUE	FALSE	FALSE	GGCTGCTAATTGGATTAAAGACT	A
chr3:155485297:155485470:-@chr3:155485066:155485152:-@chr3:155483671:155483754:-	DHX36	ENSG00000174953	0.98	0.82	0.94	0.9	0.94	0.87	TRUE	FALSE	TRUE	FALSE	TRUE	CTATGTCTGCTATTTTTAAGGGA	G
chr3:16287456:16287582:+@chr3:16288170:16288233:+@chr3:16302853:16302959:+	OXNAD1	ENSG00000154814	0.96	0.73	0.97	0.79	0.94	0.69	TRUE	FALSE	TRUE	FALSE	TRUE	AATTTTACTTTCTATTAAAGCAT	C
chr3:185515050:185515156:+@chr3:185517803:185517979:+@chr3:185518199:185518298:+	EIF4G1	ENSG00000114867	0.97	0.8	0.95	0.89	0.96	0.72	TRUE	FALSE	TRUE	FALSE	TRUE	GCTTTCCTCCCTCCTGACAGCAC	C
chr4:129218393:129218567:+@chr4:129222770:129222910:+@chr4:129231606:129231749:+	LARP2	ENSG00000138709	0.97	0.78	0.92	0.76	0.93	0.73	TRUE	FALSE	TRUE	FALSE	TRUE	ATGATTTTGTTTTCTTCAAGCTA	C
chr4:20324153:20324260:+@chr4:20335529:20335609:+@chr4:20338006:20338118:+	PACRGL	ENSG00000163138	0.18	0.05	0.24	0.02	0.31	0.04	TRUE	FALSE	TRUE	FALSE	TRUE	CCCTAATCTTACTTTAAAAGCTT	C
chr4:83513623:83514173:-@chr4:83511705:83511761:-@chr4:83499648:83499816:-	HNRNPD	ENSG00000138668	0.86	0.58	0.8	0.47	0.82	0.56	TRUE	FALSE	TRUE	FALSE	TRUE	ACCGGTTGTTAATTCCCTAGCCA	C
chr4:88335500:88335866:-@chr4:88325427:88325975:-@chr4:88323379:88323565:-	KLHL8	ENSG00000145332	0.78	0.56	0.76	0.7	0.76	0.69	TRUE	FALSE	TRUE	FALSE	TRUE	TCTTGGTTTCTTTTGAACAGGTT	G
chr5:137323204:137323351:-@chr5:137320065:137320130:-@chr5:137317754:137317964:-	C5orf5	ENSG00000031003	0.39	0.04	0.25	0.04	0.23	0.05	TRUE	FALSE	TRUE	FALSE	TRUE	CATTTTTTCCATTTTATTAGCGT	C
chr5:141371661:141371790:-@chr5:141367548:141367649:-@chr5:141365893:141366075:-	GNPDA1	ENSG00000113552	0.99	0.74	0.94	0.84	0.91	0.75	TRUE	FALSE	TRUE	FALSE	TRUE	GGGTGTGGCCACTCTTGCAGGGA	G
chr5:69398877:69399029:+@chr5:69400818:69400913:+@chr5:69402224:69402334:+	SMN2	ENSG00000205571	0.94	0.8	0.9	0.85	0.88	0.71	TRUE	FALSE	TRUE	FALSE	TRUE	CTTTGAAATATTCCTTATAGCCA	C
chr6:122786425:122786530:+@chr6:122790747:122790800:+@chr6:122794274:122794358:+	HSF2	ENSG00000025156	0.25	0.11	0.25	0.09	0.38	0.07	TRUE	FALSE	TRUE	FALSE	TRUE	TTTCTTGTTTGGTCTTTCAGCTT	C
chr6:34956044:34956131:-@chr6:34955722:34955818:-@chr6:34953533:34954475:-	TAF11	ENSG00000064995	0.95	0.66	0.9	0.71	0.86	0.59	TRUE	FALSE	TRUE	FALSE	TRUE	GTCTTTGTGCTTCTTTCAAGCTG	C
chr6:43010191:43010314:+@chr6:43011128:43011189:+@chr6:43011290:43011386:+	CNPY3	ENSG00000137161	0.32	0.09	0.39	0.07	0.3	0.19	TRUE	FALSE	TRUE	FALSE	TRUE	CTCTCTGGTCTGTGTTCCAGCAT	C
chr6:43084083:43084191:+@chr6:43084409:43084462:+@chr6:43084773:43084943:+	PPP2R5D	ENSG00000112640	0.89	0.55	0.8	0.58	0.73	0.3	TRUE	FALSE	TRUE	FALSE	TRUE	TCTACCTCACACCTTTGCAGCTG	C
chr6:74246380:74246570:+@chr6:74246737:74246811:+@chr6:74247119:74247249:+	MTO1	ENSG00000135297	0.02	0.2	0.1	0.13	0.05	0.2	TRUE	FALSE	TRUE	FALSE	FALSE	gtttgtttgtttgttttgagacg	a
chr6:74246380:74246570:+@chr6:74246762:74246811:+@chr6:74247119:74247249:+	MTO1	ENSG00000135297	0.02	0.23	0.11	0.14	0.06	0.22	TRUE	FALSE	TRUE	FALSE	FALSE	gttttgctcttgttgcccaggat	g
chr7:154725392:154725491:+@chr7:154726470:154726540:+@chr7:154730884:154732879:+	INSIG1	ENSG00000186480	0.18	0.06	0.13	0.07	0.17	0.03	TRUE	FALSE	TRUE	FALSE	TRUE	AGTACATTTATTTTTGCCAGCTG	C
chr7:158137746:158137933:-@chr7:158136285:158136425:-@chr7:158131913:158132016:-	NCAPG2	ENSG00000146918	0.8	0.61	0.82	0.41	0.84	0.54	TRUE	FALSE	TRUE	FALSE	TRUE	ACGTATGTGTTTTCTTGTAGCTG	C
chr7:64853527:64853700:+@chr7:64856949:64857083:+@chr7:64858202:64858374:+	SNORA22	ENSG00000206634	0.54	0.26	0.48	0.11	0.56	0.18	TRUE	FALSE	TRUE	FALSE	TRUE	CGTTCTTTTTCTACTTTCAGCAA	C
chr7:75346253:75346514:+@chr7:75348619:75348740:+@chr7:75349083:75349490:+	RHBDD2	ENSG00000005486	0.51	0.25	0.56	0.19	0.56	0.21	TRUE	FALSE	TRUE	FALSE	TRUE	TTTTTTCTTCCTCTGAACAGCCA	C
chr8:33486806:33486992:-@chr8:33484289:33484381:-@chr8:33480808:33480995:-	C8orf41	ENSG00000129696	0.89	0.59	0.84	0.53	0.75	0.41	TRUE	FALSE	TRUE	FALSE	TRUE	GACGATTTGTCTGGTTGCAGCCA	C
chr8:82792972:82793014:-@chr8:82792039:82792078:-@chr8:82789777:82789904:-	ZFAND1	ENSG00000104231	0.26	0.05	0.18	0.04	0.19	0.05	TRUE	FALSE	TRUE	FALSE	TRUE	ACTTGCTATTATTATTTAAGCCT	C
chr9:138691234:138691409:-@chr9:138690858:138690953:-@chr9:138689008:138689080:-	AGPAT2	ENSG00000169692	0.81	0.65	0.81	0.75	0.87	0.75	TRUE	FALSE	TRUE	FALSE	TRUE	AGGCTCTCCTCTCCCTGCAGCTC	C
chr9:14851:15004:-@chr9:9026:9252:-@chr9:8381:8479:-	AL928970.15-2	ENSG00000185871	0.42	0.62	0.44	0.53	0.51	0.74	TRUE	FALSE	TRUE	FALSE	FALSE	CATCAGAGTTAACTTTGCAGTGA	T
chrX:13690384:13690484:+@chrX:13691785:13691895:+@chrX:13695167:13695324:+	OFD1	ENSG00000046651	0.63	0.29	0.59	0.32	0.59	0.21	TRUE	FALSE	TRUE	FALSE	TRUE	GACAATTGTGCCTCATGCAGCTG	C
chrX:44805513:44805608:+@chrX:44806836:44806937:+@chrX:44807611:44808006:+	UTX	ENSG00000147050	0.33	0.12	0.4	0.05	0.59	0.03	TRUE	FALSE	TRUE	FALSE	TRUE	TCTTTTTGTTCTTCTTCTAGCAT	C
chrX:53266746:53266823:-@chrX:53264183:53264305:-@chrX:53263703:53263873:-	JARID1C	ENSG00000126012	0.99	0.81	0.93	0.87	0.94	0.9	TRUE	FALSE	TRUE	FALSE	TRUE	TTGAGCCATTTCTTCTTCAGGCC	G
chr1:101233254:101233293:-@chr1:101230781:101230884:-@chr1:101227769:101228775:-	DPH5	ENSG00000117543	0.88	0.75	0.88	0.92	0.86	0.72	TRUE	TRUE	FALSE	FALSE	TRUE	ATCTAGTTTTCTGCCTATAGGGG	G
chr1:149181663:149181788:+@chr1:149181952:149182153:+@chr1:149183020:149183093:+	SETDB1	ENSG00000143379	0.96	0.75	0.9	0.92	0.84	0.84	TRUE	TRUE	FALSE	FALSE	TRUE	TATCTTTCCCTTTTACTCAGGGC	G
chr1:149475658:149475863:+@chr1:149477282:149477365:+@chr1:149478230:149478278:+	PIP5K1A	ENSG00000143398	0.92	0.34	0.78	0.66	0.59	0.6	TRUE	TRUE	FALSE	FALSE	TRUE	TTCCTTTTTGCCTTTTCCAGTAT	T
chr1:32157158:32157846:-@chr1:32154083:32154175:-@chr1:32149884:32150014:-	PTP4A2	ENSG00000184007	0.63	0.52	0.61	0.62	0.58	0.42	TRUE	TRUE	FALSE	FALSE	TRUE	aattttttttttttttaaaGGAA	G
chr1:38033996:38034105:+@chr1:38035003:38035079:+@chr1:38037826:38039865:+	MANEAL	ENSG00000185090	0.9	0.74	0.93	0.93	0.84	0.76	TRUE	TRUE	FALSE	FALSE	TRUE	TACTCCTCTGTTTGTGGCAGGTG	G
chr10:99201418:99201665:+@chr10:99201837:99202031:+@chr10:99202162:99202250:+	ZDHHC16	ENSG00000171307	0.99	0.86	0.96	0.96	0.93	0.96	TRUE	TRUE	FALSE	FALSE	TRUE	GACCTTGCTGGTGTTGGCAGGTG	G
chr11:47544034:47544114:+@chr11:47547828:47548019:+@chr11:47549599:47549944:+	PTPMT1	ENSG00000110536	0.66	0.77	0.65	0.7	0.84	0.8	TRUE	TRUE	FALSE	FALSE	FALSE	ACTGGTGGACCTGGTTCCAGGAG	G
chr11:85385517:85385620:-@chr11:85378941:85379069:-@chr11:85372557:85372664:-	PICALM	ENSG00000073921	0.27	0.46	0.24	0.18	0.39	0.38	TRUE	TRUE	FALSE	FALSE	FALSE	TCCTTTCTCTGCTACTGTAGATG	A
chr14:23637524:23637727:+@chr14:23638098:23638285:+@chr14:23638607:23638769:+	PCK2	ENSG00000100889	0.85	0.64	0.89	0.92	0.78	0.77	TRUE	TRUE	FALSE	FALSE	TRUE	CATGACCCCATTGTCCCCAGGGG	G
chr14:92245770:92245970:-@chr14:92240738:92240805:-@chr14:92239908:92240459:-	LGMN	ENSG00000100600	0.87	0.69	0.9	0.88	0.66	0.77	TRUE	TRUE	FALSE	FALSE	TRUE	TCTCGTTTGTTTTCTCCCAGTAC	T
chr16:30036492:30036606:-@chr16:30035959:30036107:-@chr16:30035716:30035825:-	MAPK3	ENSG00000102882	0.96	0.65	0.87	0.83	0.8	0.75	TRUE	TRUE	FALSE	FALSE	TRUE	AGTCACCTCCTTATCCACAGGCA	G
chr17:77485820:77485912:-@chr17:77485493:77485656:-@chr17:77483560:77484543:-	PYCR1	ENSG00000183010	0.76	0.58	0.76	0.82	0.56	0.34	TRUE	TRUE	FALSE	FALSE	TRUE	AGCCTTTCTTCTGGCTGCAGGGG	G
chr17_random:2310317:2310409:-@chr17_random:2309989:2310153:-@chr17_random:2308043:2309031:-	N/A	N/A	0.36	0.16	0.27	0.33	0.22	0.11	TRUE	TRUE	FALSE	FALSE	TRUE	#N/A	#N/A
chr20:61984516:61984617:+@chr20:61990987:61991035:+@chr20:61991647:61993342:+	TPD52L2	ENSG00000101150	0.99	0.88	0.96	0.98	0.93	0.89	TRUE	TRUE	FALSE	FALSE	TRUE	TCTTCCCTCTCTCTTTAAAGGAA	G
chr22:29152705:29152832:+@chr22:29153158:29153390:+@chr22:29154449:29155041:+	MTP18	ENSG00000100010	0.87	0.71	0.81	0.8	0.55	0.5	TRUE	TRUE	FALSE	FALSE	TRUE	AGTGTCTCTGCGCCCACCAGGTG	G
chr22:29152705:29152832:+@chr22:29153227:29153390:+@chr22:29154449:29155041:+	MTP18	ENSG00000100010	0.83	0.62	0.76	0.77	0.57	0.45	TRUE	TRUE	FALSE	FALSE	TRUE	TGGACACCTTTGTATGGCAGGCT	G
chr5:180220134:180220290:-@chr5:180211594:180211666:-@chr5:180207219:180211099:-	AC022413.4-2	ENSG00000214302	0.14	0.03	0.17	0.16	0.09	0.03	TRUE	TRUE	FALSE	FALSE	TRUE	taatatattttaatatGCAGGTT	G
chr5:56545658:56545777:+@chr5:56552960:56552980:+@chr5:56562430:56562553:+	GPBP1	ENSG00000062194	0.21	0.07	0.17	0.25	0.09	0.1	TRUE	TRUE	FALSE	FALSE	TRUE	ATCTTATCATTTGTTAATAGGTC	G
chr5:79318529:79318686:-@chr5:79317150:79317238:-@chr5:79308295:79315373:-	MTX3	ENSG00000177034	0.21	0.06	0.21	0.25	0.13	0.08	TRUE	TRUE	FALSE	FALSE	TRUE	TTTCTGTCCTGGCTTCTTAGGCA	G
chr6:168034391:168034558:+@chr6:168037391:168037435:+@chr6:168040407:168040501:+	MLLT4	ENSG00000130396	0.03	0.21	0.03	0.05	0.11	0.1	TRUE	TRUE	FALSE	FALSE	FALSE	GGCATGTGTCTTAACCCCAGGGA	G
chr7:56113289:56113373:+@chr7:56113551:56113695:+@chr7:56114715:56115859:+	SUMF2	ENSG00000129103	0.96	0.75	0.92	0.9	0.83	0.74	TRUE	TRUE	FALSE	FALSE	TRUE	ACCCGCCGGTGGGGCTGCAGGGC	G
chrX:135117617:135117786:+@chrX:135118280:135118466:+@chrX:135119696:135121184:+	FHL1	ENSG00000022267	0.92	0.77	0.86	0.88	0.83	0.71	TRUE	TRUE	FALSE	FALSE	TRUE	TGCTACACTCCCTGGTCTAGGCC	G
chrX:52944810:52945292:+@chrX:52946319:52946411:+@chrX:52952861:52954310:+	FAM156B	ENSG00000179304	0.98	0.84	0.95	0.96	0.92	0.88	TRUE	TRUE	FALSE	FALSE	TRUE	CTCTTTCTCCTTCCGCACAGGAG	G
chr1:115102069:115102147:-@chr1:115093965:115094351:-@chr1:115083836:115084034:-	CSDE1	ENSG00000009307	0.9	0.7	0.8	0.89	0.9	0.76	TRUE	TRUE	TRUE	FALSE	TRUE	TCTTCATTTTTTACCTTTAGTAT	T
chr1:13972160:13972270:+@chr1:13977500:13981913:+@chr1:13985597:13987158:+	PRDM2	ENSG00000116731	0.92	0.8	0.98	0.96	0.98	0.92	TRUE	TRUE	TRUE	FALSE	TRUE	TGCTTCCATGTGCTTTCTAGGTC	G
chr1:14601:14754:-@chr1:8131:8229:-@chr1:7778:7924:-	AL627309.15-1	ENSG00000146556	0.81	0.64	0.87	0.89	0.86	0.7	TRUE	TRUE	TRUE	FALSE	TRUE	ATGGCAGGATCTCCCAGCAGGTA	G
chr1:14601:14754:-@chr1:8131:8232:-@chr1:7778:7924:-	AL627309.15-1	ENSG00000146556	0.72	0.57	0.81	0.85	0.81	0.66	TRUE	TRUE	TRUE	FALSE	TRUE	TCCATGGCAGGATCTCCCAGCAG	C
chr1:14601:14754:-@chr1:8131:8242:-@chr1:7778:7924:-	AL627309.15-1	ENSG00000146556	0.73	0.6	0.85	0.86	0.83	0.67	TRUE	TRUE	TRUE	FALSE	TRUE	TGTGATCTTCTCCATGGCAGGAT	G
chr1:152191118:152191362:-@chr1:152190360:152190766:-@chr1:152188215:152188484:-	CRTC2	ENSG00000160741	0.91	0.71	0.92	0.93	0.84	0.67	TRUE	TRUE	TRUE	FALSE	TRUE	TTTTTTGTCTGTGCCTGCAGGAC	G
chr1:152451558:152451724:-@chr1:152451420:152451478:-@chr1:152445807:152446748:-	C1orf43	ENSG00000143612	0.97	0.84	0.92	0.93	0.93	0.87	TRUE	TRUE	TRUE	FALSE	TRUE	CTTCCTTTCTCTTTCCTAAGGTC	G
chr1:153227205:153227949:+@chr1:153228660:153228807:+@chr1:153229259:153229357:+	FLAD1	ENSG00000160688	0.64	0.39	0.71	0.84	0.75	0.51	TRUE	TRUE	TRUE	FALSE	TRUE	CTTCCCTGCCTGCTTGGCAGGGT	G
chr1:154291678:154291840:+@chr1:154294393:154294482:+@chr1:154294730:154295229:+	ROBLD3	ENSG00000116586	0.95	0.79	0.94	0.91	0.91	0.84	TRUE	TRUE	TRUE	FALSE	TRUE	CATCATATCACCCCCACCAGGAG	G
chr1:154835384:154835520:-@chr1:154834837:154834910:-@chr1:154834643:154834735:-	GPATCH4	ENSG00000160818	0.94	0.79	0.92	0.91	0.94	0.84	TRUE	TRUE	TRUE	FALSE	TRUE	TCGCTCACTGTCCTCTGCAGGCA	G
chr1:158519358:158519523:-@chr1:158518831:158518916:-@chr1:158518453:158518614:-	PEX19	ENSG00000162735	0.98	0.8	0.98	0.99	0.97	0.88	TRUE	TRUE	TRUE	FALSE	TRUE	GCTTTTTTAATCTCTCCTAGGCA	G
chr1:158521469:158521565:-@chr1:158519944:158520053:-@chr1:158519358:158519523:-	PEX19	ENSG00000162735	0.9	0.59	0.86	0.88	0.91	0.67	TRUE	TRUE	TRUE	FALSE	TRUE	CATGTCTCTTGTCTCTGAAGGTG	G
chr1:167616343:167616471:+@chr1:167617924:167618143:+@chr1:167622859:167623071:+	BLZF1	ENSG00000117475	0.84	0.96	0.84	0.42	0.79	0.99	TRUE	TRUE	TRUE	FALSE	FALSE	TTCATGTGTGTTCTATGCAGATT	A
chr1:191256850:191256948:-@chr1:191256060:191256134:-@chr1:191254158:191254573:-	UCHL5	ENSG00000116750	0.45	0.16	0.46	0.69	0.57	0.27	TRUE	TRUE	TRUE	FALSE	TRUE	aactggtctgtgtaccacagttt	t
chr1:191295376:191295529:+@chr1:191311573:191311793:+@chr1:191312254:191312400:+	TROVE2	ENSG00000116747	0.87	0.62	0.81	0.99	0.93	0.73	TRUE	TRUE	TRUE	FALSE	TRUE	AATTCTTTATCTTGTTAAAGGAC	G
chr1:19443987:19444111:-@chr1:19443031:19443096:-@chr1:19442695:19442788:-	KIAA0090	ENSG00000127463	0.95	0.81	0.96	0.92	0.96	0.87	TRUE	TRUE	TRUE	FALSE	TRUE	CTAACTTTCATGTCTCTCAGTGT	T
chr1:19507536:19507723:-@chr1:19507239:19507343:-@chr1:19506395:19506491:-	AKR7A2	ENSG00000053371	0.95	0.8	0.92	0.98	0.96	0.88	TRUE	TRUE	TRUE	FALSE	TRUE	CTGGAGCCTCACCCATGCAGGGC	G
chr1:201129935:201130033:-@chr1:201128990:201129176:-@chr1:201126853:201128410:-	KLHL12	ENSG00000117153	0.89	0.7	0.81	0.92	0.87	0.68	TRUE	TRUE	TRUE	FALSE	TRUE	AATGCATTCATTTTCCCCAGGTG	G
chr1:210306777:210306850:+@chr1:210308189:210308292:+@chr1:210308564:210308668:+	DTL	ENSG00000143476	0.95	0.73	0.89	0.95	0.96	0.73	TRUE	TRUE	TRUE	FALSE	TRUE	TTATTTGCCTTGGTTTTTAGGAT	G
chr1:233609957:233610087:+@chr1:233631441:233631525:+@chr1:233644371:233644556:+	TBCE	ENSG00000116957	0.61	0.39	0.59	0.68	0.68	0.5	TRUE	TRUE	TRUE	FALSE	TRUE	GGTTTTTCTTGTTCTGCTAGGAC	G
chr1:24861738:24861882:+@chr1:24862261:24862302:+@chr1:24865893:24866003:+	SRRM1	ENSG00000133226	0.41	0.19	0.39	0.54	0.43	0.16	TRUE	TRUE	TRUE	FALSE	TRUE	TTTTTCTCCACTGCTCTCAGGAT	G
chr1:40086245:40086356:-@chr1:40085807:40085919:-@chr1:40085479:40085556:-	TRIT1	ENSG00000043514	0.9	0.64	0.84	0.97	0.86	0.77	TRUE	TRUE	TRUE	FALSE	TRUE	TGATACCCTCCTGTTCCCAGCCA	C
chr1:44213189:44213366:+@chr1:44214059:44214107:+@chr1:44214349:44214432:+	ATP6V0B	ENSG00000117410	0.88	0.77	0.91	0.88	0.9	0.79	TRUE	TRUE	TRUE	FALSE	TRUE	TTTCTCCCTCACTGCTGCAGGAG	G
chr1:44593151:44593526:-@chr1:44591109:44591184:-@chr1:44577304:44577581:-	ERI3	ENSG00000117419	0.9	0.74	0.93	0.93	0.91	0.77	TRUE	TRUE	TRUE	FALSE	TRUE	AGATGTGTATTTATCCACAGCAT	C
chr1:45806241:45806436:+@chr1:45806744:45806943:+@chr1:45807186:45807258:+	AKR1A1	ENSG00000117448	0.52	0.27	0.52	0.67	0.62	0.32	TRUE	TRUE	TRUE	FALSE	TRUE	TGGGTTATTCTTTGGCTCAGGTG	G
chr1:5659:5810:-@chr1:4833:4901:-@chr1:4269:4692:-	AL627309.15-1	ENSG00000146556	0.99	0.88	0.97	0.96	0.94	0.95	TRUE	TRUE	TRUE	FALSE	TRUE	CTGTGGCTTTCCCGTTGCAGTGA	T
chr1:68722221:68722361:-@chr1:68720912:68721168:-@chr1:68719711:68719883:-	DEPDC1	ENSG00000024526	0.34	0.09	0.32	0.22	0.26	0.18	TRUE	TRUE	TRUE	FALSE	TRUE	TTTGTTTCATTTCCTGGTAGTTG	T
chr1:7469:7605:-@chr1:7096:7231:-@chr1:6721:6918:-	AL627309.15-1	ENSG00000146556	0.76	0.62	0.72	0.7	0.77	0.62	TRUE	TRUE	TRUE	FALSE	TRUE	CCCCCATGTCGCCTCTGTAGGTA	G
chr1:7469:7605:-@chr1:7122:7231:-@chr1:6721:6918:-	AL627309.15-1	ENSG00000146556	0.41	0.3	0.42	0.38	0.48	0.34	TRUE	TRUE	TRUE	FALSE	TRUE	CCCCCATGTCGCCTCTGTAGGTA	G
chr10:127404241:127404397:+@chr10:127407562:127407663:+@chr10:127407917:127408038:+	C10orf137	ENSG00000107938	0.75	0.52	0.7	0.76	0.72	0.46	TRUE	TRUE	TRUE	FALSE	TRUE	TATCCTTGCACTTTTCACAGGGA	G
chr10:45566205:45566292:+@chr10:45566936:45567007:+@chr10:45568042:45568160:+	FAM21C	ENSG00000172661	0.94	0.74	0.94	0.97	0.97	0.85	TRUE	TRUE	TRUE	FALSE	TRUE	ACTGTGAACTGTTCTTCAAGCCT	C
chr10:51293115:51293392:-@chr10:51290330:51290388:-@chr10:51283224:51283317:-	TIMM23	ENSG00000138297	0.95	0.79	0.93	0.93	0.92	0.77	TRUE	TRUE	TRUE	FALSE	TRUE	ACATTTTGTTTTCTCTCTAGTAA	T
chr10:51555823:51555945:+@chr10:51556926:51556988:+@chr10:51557349:51557561:+	FAM21A	ENSG00000099290	0.84	0.5	0.79	0.86	0.84	0.44	TRUE	TRUE	TRUE	FALSE	TRUE	CTGGATGTAATTTTACACAGGAC	G
chr11:111462574:111462732:-@chr11:111461912:111462244:-@chr11:111460746:111461396:-	TIMM8B	ENSG00000150779	0.28	0.14	0.26	0.4	0.33	0.21	TRUE	TRUE	TRUE	FALSE	TRUE	cctccctctgctccttgcaggcc	g
chr11:116583896:116583990:-@chr11:116582993:116583086:-@chr11:116582607:116582724:-	PCSK7	ENSG00000160613	0.69	0.33	0.74	0.59	0.83	0.46	TRUE	TRUE	TRUE	FALSE	TRUE	GCTGCCCCTTGCTGCCCTAGGGG	G
chr11:125643793:125644087:-@chr11:125643108:125643191:-@chr11:125642654:125642817:-	SRPR	ENSG00000182934	0.96	0.67	0.91	0.92	0.91	0.78	TRUE	TRUE	TRUE	FALSE	TRUE	GAGACATACTCTTTCTCCAGGAA	G
chr11:133624271:133624366:-@chr11:133623913:133624063:-@chr11:133623383:133623588:-	THYN1	ENSG00000151500	0.68	0.22	0.52	0.6	0.61	0.28	TRUE	TRUE	TRUE	FALSE	TRUE	TGTACACTGTTGTCACATAGGTG	G
chr11:47710665:47710798:-@chr11:47710245:47710347:-@chr11:47709502:47709689:-	FNBP4	ENSG00000109920	0.59	0.33	0.56	0.75	0.65	0.42	TRUE	TRUE	TRUE	FALSE	TRUE	GAGCTCTGTGCGCTTTACAGGAC	G
chr11:59118059:59118304:-@chr11:59117653:59117773:-@chr11:59105500:59105603:-	OSBP	ENSG00000110048	0.98	0.81	0.96	0.93	0.93	0.84	TRUE	TRUE	TRUE	FALSE	TRUE	TTGAACCTGATTTCTTCAAGGTG	G
chr11:62357840:62357985:-@chr11:62357666:62357722:-@chr11:62356960:62357179:-	WDR74	ENSG00000133316	0.85	0.68	0.85	0.87	0.84	0.7	TRUE	TRUE	TRUE	FALSE	TRUE	AGGTCCCTCATCTTTTGCAGGTT	G
chr11:63428834:63429091:+@chr11:63432308:63432352:+@chr11:63432925:63433433:+	MARK2	ENSG00000072518	0.88	0.69	0.88	0.93	0.98	0.57	TRUE	TRUE	TRUE	FALSE	TRUE	CCCTCGCTCTGTTTTTTGAGGAA	G
chr11:85017265:85017380:+@chr11:85019837:85020008:+@chr11:85020379:85020500:+	TMEM126B	ENSG00000171204	0.54	0.26	0.41	0.53	0.52	0.29	TRUE	TRUE	TRUE	FALSE	TRUE	GCTCTCTCCTACCTCTCTAGGAA	G
chr12:103004755:103004922:+@chr12:103005894:103005946:+@chr12:103011294:103011471:+	HCFC2	ENSG00000111727	0.96	0.73	0.96	0.97	0.99	0.8	TRUE	TRUE	TRUE	FALSE	TRUE	AACCTTTCTCATTCCTTCAGGAG	G
chr12:110378216:110378443:-@chr12:110375864:110376032:-@chr12:110374401:110375027:-	ATXN2	ENSG00000204842	0.87	0.55	0.73	0.86	0.89	0.48	TRUE	TRUE	TRUE	FALSE	TRUE	AAAAGAGCTCTCTGTTTCAGGCT	G
chr12:272186:272596:-@chr12:265553:265634:-@chr12:259484:265089:-	JARID1A	ENSG00000073614	0.33	0.07	0.27	0.38	0.51	0.14	TRUE	TRUE	TRUE	FALSE	TRUE	TATTTGCTAACTTTTTATAGGGA	G
chr12:49729084:49729235:+@chr12:49732142:49732257:+@chr12:49736400:49736552:+	LETMD1	ENSG00000050426	0.33	0.18	0.3	0.42	0.32	0.21	TRUE	TRUE	TRUE	FALSE	TRUE	CCTCTACTTTAATGAGGCAGGAT	G
chr12:49736400:49736552:+@chr12:49738056:49738178:+@chr12:49739411:49740474:+	LETMD1	ENSG00000050426	0.79	0.45	0.73	0.64	0.77	0.5	TRUE	TRUE	TRUE	FALSE	TRUE	ATCATTCTATGATTATTAAGGAC	G
chr12:49736400:49736552:+@chr12:49738082:49738178:+@chr12:49739411:49740474:+	LETMD1	ENSG00000050426	0.93	0.7	0.92	0.89	0.94	0.76	TRUE	TRUE	TRUE	FALSE	TRUE	TTCTGTTCTGAGTGGTATAGGCT	G
chr12:52142544:52142618:+@chr12:52145983:52146024:+@chr12:52147272:52147344:+	PCBP2	ENSG00000197111	0.82	0.63	0.76	0.81	0.81	0.7	TRUE	TRUE	TRUE	FALSE	TRUE	CTGTTTTCCTCCTTTTGTAGGCC	G
chr12:56212622:56212693:-@chr12:56212263:56212365:-@chr12:56212065:56212156:-	DCTN2	ENSG00000175203	0.82	0.57	0.79	0.89	0.82	0.52	TRUE	TRUE	TRUE	FALSE	TRUE	GCCCCATTGTGTCCCTTCAGGTG	G
chr12:56399043:56399232:+@chr12:56400149:56400313:+@chr12:56400456:56400568:+	OS9	ENSG00000135506	0.24	0.63	0.42	0.37	0.32	0.6	TRUE	TRUE	TRUE	FALSE	FALSE	TGTGTGTCTCCCCCTCTAAGAGG	A
chr12:56467090:56467212:+@chr12:56473036:56473123:+@chr12:56476227:56477637:+	TSFM	ENSG00000123297	0.93	0.79	0.9	0.93	0.91	0.82	TRUE	TRUE	TRUE	FALSE	TRUE	TGTTTTCTTCGTGCACTTAGGGT	G
chr12:75733768:75733930:+@chr12:75738969:75739078:+@chr12:75740317:75740442:+	ZDHHC17	ENSG00000186908	0.31	0.09	0.27	0.38	0.3	0.14	TRUE	TRUE	TRUE	FALSE	TRUE	CCCTCAATCTTTTTGTCTAGGCA	G
chr12:857639:857788:+@chr12:860148:860426:+@chr12:861119:861216:+	WNK1	ENSG00000060237	0.5	0.26	0.49	0.62	0.55	0.18	TRUE	TRUE	TRUE	FALSE	TRUE	CTTCCTCATTTCTGTCACAGGGC	G
chr12:94924223:94924318:-@chr12:94921747:94921829:-@chr12:94920869:94920973:-	LTA4H	ENSG00000111144	0.75	0.51	0.72	0.68	0.72	0.46	TRUE	TRUE	TRUE	FALSE	TRUE	CTTCTTTATTTTGCTCTTAGGCA	G
chr14:22629571:22629682:-@chr14:22629031:22629150:-@chr14:22620797:22620885:-	ACIN1	ENSG00000100813	0.33	0.45	0.29	0.24	0.28	0.36	TRUE	TRUE	TRUE	FALSE	FALSE	ACCCGATCTGTACTTTGCAGAAG	A
chr14:34635515:34635590:-@chr14:34634005:34634141:-@chr14:34630027:34630164:-	C14orf10	ENSG00000092020	0.83	0.67	0.8	0.9	0.81	0.69	TRUE	TRUE	TRUE	FALSE	TRUE	TTATTATTTTTCTTCCCAAGGCC	G
chr14:38670913:38671023:+@chr14:38672616:38672674:+@chr14:38675395:38675928:+	SIP1	ENSG00000092208	0.91	0.54	0.84	0.84	0.85	0.71	TRUE	TRUE	TRUE	FALSE	TRUE	ttttctttttttttttttaGGAT	G
chr14:49351222:49351325:-@chr14:49350456:49350518:-@chr14:49342489:49342601:-	SDCCAG1	ENSG00000165525	0.95	0.75	0.94	0.91	0.92	0.81	TRUE	TRUE	TRUE	FALSE	TRUE	TTTATTTGTCTGTATTTAAGGAG	G
chr14:54527681:54527868:-@chr14:54525496:54525680:-@chr14:54523614:54523855:-	WDHD1	ENSG00000198554	0.98	0.78	0.92	0.96	0.99	0.81	TRUE	TRUE	TRUE	FALSE	TRUE	TTAATCTTACCTGTTTGTAGGTG	G
chr14:57963525:57963713:-@chr14:57960479:57960566:-@chr14:57948378:57948442:-	TIMM9	ENSG00000100575	0.9	0.65	0.84	0.9	0.93	0.65	TRUE	TRUE	TRUE	FALSE	TRUE	catattacctcatttttcaggta	g
chr14:67210845:67211301:-@chr14:67199499:67199660:-@chr14:67198947:67199005:-	VTI1B	ENSG00000100568	0.17	0.05	0.25	0.29	0.32	0.02	TRUE	TRUE	TRUE	FALSE	TRUE	tgttctatttttgttcaaagggg	g
chr14:73489891:73490025:+@chr14:73491907:73491965:+@chr14:73492261:73492384:+	COQ6	ENSG00000119723	0.73	0.43	0.67	0.84	0.83	0.4	TRUE	TRUE	TRUE	FALSE	TRUE	ATAGATCCTTTCTTTTGTAGGTT	G
chr14:88408427:88408549:+@chr14:88411123:88411206:+@chr14:88413391:88414088:+	TTC8	ENSG00000165533	0.91	0.69	0.88	0.91	0.87	0.55	TRUE	TRUE	TRUE	FALSE	TRUE	TTCTTTATTTTTATACACAGGCA	G
chr14:89507272:89507368:+@chr14:89511878:89511912:+@chr14:89516637:89516729:+	TDP1	ENSG00000042088	0.91	0.76	0.92	0.91	0.91	0.53	TRUE	TRUE	TRUE	FALSE	TRUE	TGACTTCTTTTTCATCCTAGGCA	G
chr14:89555413:89555515:+@chr14:89569203:89569311:+@chr14:89579167:89580861:+	TDP1	ENSG00000042088	0.93	0.81	0.91	0.93	0.91	0.88	TRUE	TRUE	TRUE	FALSE	TRUE	TTTCCTCTGTGTGTCTGCAGGGT	G
chr15:100323796:100323949:+@chr15:100330322:100330420:+@chr15:100330627:100330773:+	FAM39B	ENSG00000185596	0.76	0.5	0.76	0.79	0.85	0.61	TRUE	TRUE	TRUE	FALSE	TRUE	ATGGCAGGATCTCCCAGCAGGTA	G
chr15:67501040:67501145:+@chr15:67501385:67501521:+@chr15:67501719:67501828:+	KIF23	ENSG00000137807	0.95	0.42	0.83	0.82	0.88	0.67	TRUE	TRUE	TRUE	FALSE	TRUE	TGTGACTTGCTACACTGTAGGTC	G
chr15:82664182:82664272:-@chr15:82663933:82664087:-@chr15:82662626:82662776:-	AC136698.6-3	ENSG00000214542	0.6	0.31	0.67	0.61	0.47	0.44	TRUE	TRUE	TRUE	FALSE	TRUE	GCTAACACCCCTTCCTCCAGGTG	G
chr15:83553260:83553350:-@chr15:83553010:83553164:-@chr15:83551703:83551853:-	AC044860.11-4	ENSG00000186702	0.59	0.31	0.68	0.61	0.47	0.44	TRUE	TRUE	TRUE	FALSE	TRUE	CTAACACCCCTTTCCTCCAGGTG	G
chr16:24708054:24710639:+@chr16:24712295:24712471:+@chr16:24713366:24713541:+	TNRC6A	ENSG00000090905	0.33	0.05	0.22	0.42	0.22	0.1	TRUE	TRUE	TRUE	FALSE	TRUE	TTTTCCCACACTTTCTAAAGGCT	G
chr16:30036492:30036606:-@chr16:30035976:30036107:-@chr16:30035716:30035825:-	MAPK3	ENSG00000102882	0.98	0.79	0.92	0.9	0.89	0.85	TRUE	TRUE	TRUE	FALSE	TRUE	AGTCACCTCCTTATCCACAGGCA	G
chr16:30639535:30639800:+@chr16:30640011:30640298:+@chr16:30640944:30641108:+	SRCAP	ENSG00000080603	0.9	0.71	0.87	0.9	0.94	0.82	TRUE	TRUE	TRUE	FALSE	TRUE	TGTTTGCTTTGTGTCTGCAGTGT	T
chr16:46843543:46843777:+@chr16:46848022:46848153:+@chr16:46850030:46850152:+	LONP2	ENSG00000102910	0.87	0.71	0.87	0.87	0.86	0.73	TRUE	TRUE	TRUE	FALSE	TRUE	ACTTTTTTTCCCCCTTCTAGTTG	T
chr16:66866095:66866653:+@chr16:66878727:66878839:+@chr16:66879150:66879275:+	SLC7A6	ENSG00000103064	0.21	0.07	0.16	0.22	0.29	0.14	TRUE	TRUE	TRUE	FALSE	TRUE	CTGTCTCTCTAATTTCTTAGGTA	G
chr16:79611206:79611382:+@chr16:79613703:79613804:+@chr16:79615821:79615884:+	CENPN	ENSG00000166451	0.59	0.25	0.57	0.54	0.5	0.33	TRUE	TRUE	TRUE	FALSE	TRUE	TTGCAAATTTTCATTTCAAGGCG	G
chr16:88571548:88571711:+@chr16:88572719:88572787:+@chr16:88574151:88574245:+	AFG3L1	ENSG00000214234	0.75	0.55	0.87	0.86	0.91	0.64	TRUE	TRUE	TRUE	FALSE	TRUE	CTCATCATTTTGTCCCTCAGGGT	G
chr17:18184082:18184294:-@chr17:18179598:18179714:-@chr17:18177205:18177327:-	SHMT1	ENSG00000176974	0.53	0.4	0.56	0.71	0.69	0.47	TRUE	TRUE	TRUE	FALSE	TRUE	TGATGTTTTTCTTCCTCCAGGAG	G
chr17:18709840:18709990:+@chr17:18711320:18711372:+@chr17:18716621:18716687:+	PRPSAP2	ENSG00000141127	0.87	0.51	0.84	0.76	0.77	0.61	TRUE	TRUE	TRUE	FALSE	TRUE	TCCCCCTTTCTCTTCTCTAGGCG	G
chr17:39588180:39588305:+@chr17:39590727:39590835:+@chr17:39594765:39595370:+	C17orf53	ENSG00000125319	0.79	0.66	0.8	0.87	0.94	0.63	TRUE	TRUE	TRUE	FALSE	TRUE	ACCAGATCCTCTGTCCCCAGGAT	G
chr17:5270280:5270343:+@chr17:5272115:5272255:+@chr17:5276586:5276920:+	AC004148.1	ENSG00000215099	0.87	0.63	0.77	0.85	0.81	0.69	TRUE	TRUE	TRUE	FALSE	TRUE	TGAACTTTTTTATTTTGTAGTCT	T
chr17:7102631:7102726:+@chr17:7102869:7102969:+@chr17:7103614:7103983:+	C17orf81	ENSG00000170291	0.85	0.64	0.9	0.9	0.87	0.74	TRUE	TRUE	TRUE	FALSE	TRUE	AGCATCCTTTGTACCTACAGGTG	G
chr17:71355163:71355285:-@chr17:71354584:71354660:-@chr17:71353375:71354463:-	WBP2	ENSG00000132471	0.97	0.85	0.96	0.95	0.96	0.55	TRUE	TRUE	TRUE	FALSE	TRUE	AGGTGTGTTTGCTCTCACAGCCG	C
chr17:71578054:71578120:-@chr17:71574893:71575006:-@chr17:71571652:71571847:-	SRP68	ENSG00000167881	0.99	0.84	0.99	1	1	0.92	TRUE	TRUE	TRUE	FALSE	TRUE	TTGTTTGTGGTTTCTTACAGGGG	G
chr17:71602090:71602257:-@chr17:71598819:71598911:-@chr17:71596851:71596996:-	EXOC7	ENSG00000182473	0.19	0.08	0.19	0.23	0.3	0.16	TRUE	TRUE	TRUE	FALSE	TRUE	CTGTGTGGCTCTGGTGACAGGGA	G
chr17:77486093:77486314:-@chr17:77485820:77485912:-@chr17:77485493:77485656:-	PYCR1	ENSG00000183010	0.8	0.58	0.81	0.81	0.77	0.58	TRUE	TRUE	TRUE	FALSE	TRUE	AGGGTGCCTTCTCCCCACAGGCA	G
chr17:7775774:7775992:-@chr17:7775549:7775619:-@chr17:7775054:7775192:-	TRAPPC1	ENSG00000170043	0.95	0.82	0.91	0.91	0.93	0.86	TRUE	TRUE	TRUE	FALSE	TRUE	CTCTGCCCCTCTCCCTCCAGGAG	G
chr17:8133301:8133457:+@chr17:8133546:8133631:+@chr17:8133856:8134130:+	RANGRF	ENSG00000108961	0.72	0.42	0.67	0.65	0.6	0.42	TRUE	TRUE	TRUE	FALSE	TRUE	CCTGACTCTGATCCCCTTAGGTA	G
chr19:15371113:15371221:-@chr19:15370441:15370577:-@chr19:15369525:15369666:-	AKAP8L	ENSG00000011243	0.22	0.08	0.17	0.29	0.28	0.13	TRUE	TRUE	TRUE	FALSE	TRUE	TCGGGTCTGTCTGCCCTCAGGGC	G
chr19:40729268:40729327:+@chr19:40729414:40729771:+@chr19:40729861:40729982:+	TMEM147	ENSG00000105677	0.92	0.82	0.93	0.93	0.94	0.81	TRUE	TRUE	TRUE	FALSE	TRUE	AGCCTCAACCTGACCCGCAGGAG	G
chr2:136112936:136113162:+@chr2:136115576:136115830:+@chr2:136119419:136119567:+	R3HDM1	ENSG00000048991	0.42	0.09	0.26	0.34	0.35	0.07	TRUE	TRUE	TRUE	FALSE	TRUE	TTTCATTACTCCTCTTCTAGGTT	G
chr2:182492268:182492418:+@chr2:182493569:182493634:+@chr2:182494920:182495384:+	SSFA2	ENSG00000138434	0.76	0.45	0.61	0.7	0.66	0.54	TRUE	TRUE	TRUE	FALSE	TRUE	tatTGTTCTTACCTTTTCAGGGA	G
chr2:210575597:210575752:+@chr2:210582626:210582705:+@chr2:210588942:210589081:+	RPE	ENSG00000197713	0.59	0.38	0.68	0.84	0.69	0.44	TRUE	TRUE	TRUE	FALSE	TRUE	AGATTTTGTTTGTCTTGTAGGCA	G
chr2:219820381:219820501:+@chr2:219820628:219820723:+@chr2:219821159:219821280:+	STK16	ENSG00000115661	0.93	0.56	0.89	0.95	0.85	0.61	TRUE	TRUE	TRUE	FALSE	TRUE	CTCTGGGATCACTGTTCCAGGAC	G
chr2:227913252:227913340:+@chr2:227915705:227915779:+@chr2:227920186:227920344:+	MFF	ENSG00000168958	0.18	0.04	0.11	0.27	0.3	0.07	TRUE	TRUE	TRUE	FALSE	TRUE	AAGCATAATTATTATTTAAGGTG	G
chr2:230452942:230453088:-@chr2:230433366:230433491:-@chr2:230431732:230432534:-	TRIP12	ENSG00000153827	0.54	0.37	0.6	0.62	0.79	0.3	TRUE	TRUE	TRUE	FALSE	TRUE	TTTTGATTTTCTGCTGACAGGTC	G
chr2:233129370:233129484:+@chr2:233130838:233130972:+@chr2:233137201:233137305:+	EIF4E2	ENSG00000135930	0.86	0.61	0.76	0.81	0.8	0.68	TRUE	TRUE	TRUE	FALSE	TRUE	ACACCTTCTTTACTTCCCAGGCT	G
chr2:241690341:241690420:-@chr2:241687484:241687982:-@chr2:241685331:241685515:-	MTERFD2	ENSG00000122085	0.65	0.28	0.57	0.76	0.6	0.44	TRUE	TRUE	TRUE	FALSE	TRUE	TTTGGTCCTGTGTCTTACAGGTC	G
chr2:27208975:27209099:-@chr2:27208602:27208775:-@chr2:27208382:27208454:-	PREB	ENSG00000138073	0.88	0.71	0.88	0.86	0.84	0.7	TRUE	TRUE	TRUE	FALSE	TRUE	GCCCCTCATCCGGCCCCCAGGTT	G
chr2:27675954:27676049:+@chr2:27676341:27676424:+@chr2:27677062:27677186:+	ZNF512	ENSG00000198522	0.97	0.57	0.89	0.81	0.82	0.7	TRUE	TRUE	TRUE	FALSE	TRUE	AAGTTTCTGTCTTATGTCAGGGA	G
chr20:32125030:32125102:+@chr20:32125286:32125333:+@chr20:32127341:32127507:+	RALY	ENSG00000125970	0.82	0.64	0.76	0.83	0.86	0.67	TRUE	TRUE	TRUE	FALSE	TRUE	TCTCCCCTTTGTTTCCCCAGTGG	T
chr20:33683647:33683721:-@chr20:33683499:33683570:-@chr20:33683281:33683361:-	CPNE1	ENSG00000214078	0.72	0.41	0.73	0.61	0.76	0.35	TRUE	TRUE	TRUE	FALSE	TRUE	ATGTAGTCTCCCCTACCTAGGTC	G
chr20:47330429:47330514:+@chr20:47330847:47330908:+@chr20:47338989:47339202:+	SNORD12	ENSG00000212304	0.82	0.61	0.82	0.84	0.78	0.47	TRUE	TRUE	TRUE	FALSE	TRUE	GACCTGTTAACTTTCTATAGGTT	G
chr20:62032648:62032819:+@chr20:62032906:62032979:+@chr20:62033262:62035839:+	DNAJC5	ENSG00000101152	0.32	0.13	0.23	0.33	0.25	0.12	TRUE	TRUE	TRUE	FALSE	TRUE	CAACCTGTCTTGTCAAACAGGAG	G
chr21:33878766:33878944:-@chr21:33877664:33877842:-@chr21:33876341:33876422:-	DONSON	ENSG00000159147	0.43	0.28	0.47	0.54	0.59	0.33	TRUE	TRUE	TRUE	FALSE	TRUE	AAAATTTTTTTACTTCATAGGTC	G
chr21:39477048:39477310:-@chr21:39475568:39475674:-@chr21:39474081:39474232:-	PSMG1	ENSG00000183527	0.98	0.87	0.98	0.97	0.98	0.92	TRUE	TRUE	TRUE	FALSE	TRUE	CATCTTGTTTCTTGTGTTAGGGA	G
chr22:16551752:16551908:+@chr22:16558907:16558976:+@chr22:16565009:16565152:+	BCL2L13	ENSG00000099968	0.79	0.63	0.78	0.86	0.85	0.59	TRUE	TRUE	TRUE	FALSE	TRUE	TTTTAAAAAAATCTCTACAGGCC	G
chr22:22764796:22764909:+@chr22:22767587:22767721:+@chr22:22769366:22769546:+	CABIN1	ENSG00000099991	0.86	0.41	0.64	0.69	0.77	0.56	TRUE	TRUE	TRUE	FALSE	TRUE	CTGTTCTGTTTTGTTCACAGGCA	G
chr22:25198268:25198384:-@chr22:25197179:25197354:-@chr22:25196685:25196779:-	HPS4	ENSG00000100099	0.21	0.08	0.2	0.23	0.29	0.08	TRUE	TRUE	TRUE	FALSE	TRUE	TGCTTTTCTTGTATTTTTAGGGA	G
chr22:27425826:27425925:-@chr22:27422889:27422975:-@chr22:27421698:27421861:-	CHEK2	ENSG00000183765	0.95	0.4	0.78	0.77	0.8	0.56	TRUE	TRUE	TRUE	FALSE	TRUE	ATGCCTGCCTTTCTGTGTAGTAC	T
chr3:128777473:128777583:-@chr3:128777282:128777342:-@chr3:128776936:128777038:-	GPR175	ENSG00000163870	0.7	0.29	0.7	0.77	0.56	0.42	TRUE	TRUE	TRUE	FALSE	TRUE	AGCCCTGCCTGTCTCTGTAGGTC	G
chr3:130490387:130490530:+@chr3:130492212:130492337:+@chr3:130499887:130500068:+	C3orf37	ENSG00000183624	0.88	0.74	0.87	0.86	0.87	0.78	TRUE	TRUE	TRUE	FALSE	TRUE	TTGCTCACATTTTCCCTCAGGTG	G
chr3:135747681:135747820:+@chr3:135748867:135749004:+@chr3:135750594:135750708:+	CEP63	ENSG00000182923	0.29	0.09	0.22	0.33	0.26	0.15	TRUE	TRUE	TRUE	FALSE	TRUE	CATCCTATGTCTTTCCATAGGCC	G
chr3:192570402:192570519:+@chr3:192575545:192576072:+@chr3:192580642:192580757:+	CCDC50	ENSG00000152492	0.08	0.25	0.11	0.14	0.11	0.18	TRUE	TRUE	TRUE	FALSE	FALSE	ATCCCTCTGCCTCCACTCAGACC	A
chr3:44645570:44646040:+@chr3:44647310:44647442:+@chr3:44647558:44647717:+	ZNF197	ENSG00000186448	0.42	0.21	0.39	0.68	0.6	0.17	TRUE	TRUE	TRUE	FALSE	TRUE	cctccttaacccacacccaggtc	g
chr3:48199423:48199524:-@chr3:48197215:48197334:-@chr3:48194348:48194482:-	CDC25A	ENSG00000164045	0.86	0.36	0.7	0.8	0.78	0.48	TRUE	TRUE	TRUE	FALSE	TRUE	GTCTCAACTATGTCTTGCAGGAA	G
chr3:48480444:48480535:+@chr3:48480985:48481065:+@chr3:48481234:48481486:+	TREX1	ENSG00000213689	0.78	0.63	0.86	0.92	0.87	0.71	TRUE	TRUE	TRUE	FALSE	TRUE	CCACTCTGTTCTTGTTCTAGGTG	G
chr3:58267012:58267184:+@chr3:58271076:58271173:+@chr3:58271274:58271358:+	RPP14	ENSG00000163684	0.66	0.3	0.58	0.8	0.79	0.41	TRUE	TRUE	TRUE	FALSE	TRUE	GCCCTCTTGACTTACTGTAGGTG	G
chr3:9445507:9445693:+@chr3:9446511:9446735:+@chr3:9450529:9450634:+	SETD5	ENSG00000168137	0.56	0.78	0.53	0.59	0.44	0.87	TRUE	TRUE	TRUE	FALSE	FALSE	CCAATCTTCCTTGCTTACAGAAA	A
chr3:9705628:9705766:+@chr3:9706648:9706827:+@chr3:9714395:9714550:+	MTMR14	ENSG00000163719	0.73	0.54	0.74	0.9	0.94	0.5	TRUE	TRUE	TRUE	FALSE	TRUE	CCCTGCTCCTTCCACTGCAGGAG	G
chr3:9705628:9705766:+@chr3:9706648:9706827:+@chr3:9718474:9719077:+	MTMR14	ENSG00000163719	0.55	0.4	0.58	0.8	0.9	0.34	TRUE	TRUE	TRUE	FALSE	TRUE	CCCTGCTCCTTCCACTGCAGGAG	G
chr4:714759:714899:+@chr4:716189:716287:+@chr4:717461:717578:+	PCGF3	ENSG00000185619	0.16	0.05	0.14	0.18	0.22	0.09	TRUE	TRUE	TRUE	FALSE	TRUE	ccctctcccttccTGGGCAGGCT	G
chr4:80079218:80079606:-@chr4:80075299:80075461:-@chr4:80070348:80070503:-	PAQR3	ENSG00000163291	0.98	0.49	0.77	0.77	0.77	0.7	TRUE	TRUE	TRUE	FALSE	TRUE	CATGTGTGTTTATTTTCCAGTTT	T
chr5:137523657:137523761:-@chr5:137523143:137523187:-@chr5:137520472:137520855:-	BRD8	ENSG00000112983	0.61	0.19	0.61	0.69	0.6	0.25	TRUE	TRUE	TRUE	FALSE	TRUE	GTTTGTTTGTCCTCTAACAGGAC	G
chr5:137531522:137531666:-@chr5:137530106:137530315:-@chr5:137529416:137529696:-	BRD8	ENSG00000112983	0.87	0.65	0.79	0.83	0.85	0.61	TRUE	TRUE	TRUE	FALSE	TRUE	TGTACCTCTTTATATGTTAGGTG	G
chr5:137692072:137692117:-@chr5:137689403:137689492:-@chr5:137682807:137682962:-	CDC25C	ENSG00000158402	0.68	0.4	0.66	0.76	0.69	0.28	TRUE	TRUE	TRUE	FALSE	TRUE	CAGCAAACTCTCTTTTTTAGGCA	G
chr5:141333332:141333491:+@chr5:141334553:141334704:+@chr5:141338052:141338579:+	RNF14	ENSG00000013561	0.88	0.54	0.75	0.9	0.86	0.65	TRUE	TRUE	TRUE	FALSE	TRUE	AATCTTTGTTTTTGGTTCAGGCA	G
chr5:149749643:149749779:+@chr5:149751300:149751413:+@chr5:149751713:149751932:+	TCOF1	ENSG00000070814	0.69	0.44	0.65	0.72	0.75	0.49	TRUE	TRUE	TRUE	FALSE	TRUE	CTACCTCTTGCCACCCACAGGTG	G
chr5:177982863:177983023:-@chr5:177979445:177979503:-@chr5:177978163:177978385:-	AC022096.7	ENSG00000208373	0.42	0.06	0.3	0.42	0.32	0.14	TRUE	TRUE	TRUE	FALSE	TRUE	gtgtcccctctctccctcagtgc	t
chr5:34950557:34950823:-@chr5:34949332:34949440:-@chr5:34947416:34947674:-	RAD1	ENSG00000113456	0.63	0.37	0.52	0.73	0.68	0.41	TRUE	TRUE	TRUE	FALSE	TRUE	CATTTTTACTCTTTTCATAGGCT	G
chr5:56567550:56567616:+@chr5:56568697:56568756:+@chr5:56577884:56578068:+	GPBP1	ENSG00000062194	0.36	0.14	0.5	0.67	0.58	0.15	TRUE	TRUE	TRUE	FALSE	TRUE	ATTTCTACCACTCTCCCCAGGCC	G
chr5:74064603:74064679:-@chr5:74061841:74061979:-@chr5:74057522:74057707:-	GFM2	ENSG00000164347	0.71	0.85	0.63	0.57	0.67	0.91	TRUE	TRUE	TRUE	FALSE	FALSE	TTCATTCCTCTGGTAACCAGACT	A
chr6:30632735:30633206:+@chr6:30633906:30633968:+@chr6:30637590:30637880:+	PRR3	ENSG00000204576	0.48	0.25	0.4	0.6	0.52	0.34	TRUE	TRUE	TRUE	FALSE	TRUE	ATTTTCATGTCTGCTCTTAGGAC	G
chr6:52257354:52257638:-@chr6:52256051:52256163:-@chr6:52255410:52255618:-	MCM3	ENSG00000112118	0.99	0.84	0.95	0.96	0.96	0.89	TRUE	TRUE	TRUE	FALSE	TRUE	ATGTGGTGGCTGTTTTGCAGGAA	G
chr6:99979812:99979928:-@chr6:99970946:99971025:-@chr6:99969169:99969287:-	SFRS18	ENSG00000132424	0.73	0.54	0.74	0.81	0.81	0.61	TRUE	TRUE	TRUE	FALSE	TRUE	TCTACTTTTTTTCCCCCTAGGGC	G
chr7:134268279:134268681:+@chr7:134270979:134271056:+@chr7:134276383:134276528:+	CALD1	ENSG00000122786	0.17	0.04	0.17	0.21	0.52	0.03	TRUE	TRUE	TRUE	FALSE	TRUE	CCATTCTTGAAAATAAAAAGGGA	G
chr7:142671301:142671382:+@chr7:142671763:142671891:+@chr7:142672207:142672307:+	GSTK1	ENSG00000197448	0.98	0.8	0.95	0.92	0.97	0.84	TRUE	TRUE	TRUE	FALSE	TRUE	GCCCAACCTTCTCCTGGCAGGAA	G
chr7:142707419:142707509:+@chr7:142707595:142707655:+@chr7:142710999:142711148:+	CASP2	ENSG00000106144	0.28	0.08	0.26	0.35	0.32	0.14	TRUE	TRUE	TRUE	FALSE	TRUE	TTCCTGTTTGCTCCTCTCAGGTG	G
chr7:142789463:142789662:+@chr7:142789808:142789900:+@chr7:142790016:142790537:+	ZYX	ENSG00000159840	0.91	0.59	0.93	0.82	0.88	0.5	TRUE	TRUE	TRUE	FALSE	TRUE	TCTGACCTCTGACCCTCTAGCCC	C
chr7:30510710:30510982:-@chr7:30504944:30505079:-@chr7:30502762:30503376:-	GGCT	ENSG00000006625	0.95	0.76	0.87	0.91	0.89	0.82	TRUE	TRUE	TRUE	FALSE	TRUE	TTTGGCTGTTCTGGTTTCAGGCA	G
chr7:30510710:30510982:-@chr7:30506677:30506822:-@chr7:30502762:30503376:-	GGCT	ENSG00000006625	0.65	0.46	0.6	0.82	0.78	0.41	TRUE	TRUE	TRUE	FALSE	TRUE	CACTTTGATTTCCTTTGTAGGAT	G
chr7:36421892:36422018:+@chr7:36423214:36423324:+@chr7:36425378:36425613:+	ANLN	ENSG00000011426	0.7	0.43	0.68	0.72	0.78	0.5	TRUE	TRUE	TRUE	FALSE	TRUE	TCTTTCTTAAACATTTTTAGGTT	G
chr7:44802766:44802917:+@chr7:44804872:44804938:+@chr7:44805371:44805401:+	PPIA	ENSG00000196262	0.7	0.48	0.81	0.83	0.75	0.51	TRUE	TRUE	TRUE	FALSE	TRUE	ATTTTTTACCCCACTACTAGGTA	G
chr7:44802766:44802917:+@chr7:44804872:44805028:+@chr7:44805371:44805401:+	PPIA	ENSG00000196262	0.71	0.49	0.83	0.82	0.76	0.59	TRUE	TRUE	TRUE	FALSE	TRUE	ATTTTTTACCCCACTACTAGGTA	G
chr7:56013313:56013452:+@chr7:56013537:56013582:+@chr7:56016660:56016754:+	GBAS	ENSG00000146729	0.91	0.74	0.91	0.96	0.88	0.83	TRUE	TRUE	TRUE	FALSE	TRUE	TGAATTTTCTTTTGTTTCAGTTC	T
chr7:65078437:65078624:-@chr7:65077341:65077493:-@chr7:65076948:65077126:-	GUSB	ENSG00000169919	1	0.26	0.99	1	1	0.24	TRUE	TRUE	TRUE	FALSE	TRUE	TGGTGCTTTGGCTGTCATAGGTG	G
chr8:145226168:145226321:-@chr8:145225972:145226096:-@chr8:145225757:145225885:-	SHARPIN	ENSG00000179526	0.46	0.32	0.46	0.51	0.44	0.26	TRUE	TRUE	TRUE	FALSE	TRUE	CCTGAGCTCCACCCCCTCAGCCA	C
chr8:17874118:17874476:+@chr8:17882380:17882544:+@chr8:17887236:17887408:+	PCM1	ENSG00000078674	0.43	0.23	0.39	0.42	0.57	0.2	TRUE	TRUE	TRUE	FALSE	TRUE	TGTCACTTTTTTTACTCAAGGGT	G
chr8:42817324:42817631:-@chr8:42813486:42813681:-@chr8:42810974:42812636:-	THAP1	ENSG00000131931	0.97	0.86	0.94	0.94	0.95	0.92	TRUE	TRUE	TRUE	FALSE	TRUE	GAATTATGCCTTCTTCTTAGGTT	G
chr8:68265439:68265548:+@chr8:68268253:68268391:+@chr8:68270171:68271050:+	CSPP1	ENSG00000104218	0.96	0.66	0.86	0.91	0.89	0.71	TRUE	TRUE	TRUE	FALSE	TRUE	GTTCTGTTTTCTAACTACAGGAT	G
chr9:124087269:124087387:+@chr9:124088139:124088266:+@chr9:124093849:124093940:+	MRRF	ENSG00000148187	0.27	0.15	0.22	0.35	0.37	0.11	TRUE	TRUE	TRUE	FALSE	TRUE	TTTTGTTATtggtccactaggaa	g
chr9:129992429:129992544:-@chr9:129989963:129990034:-@chr9:129987647:129987876:-	CIZ1	ENSG00000148337	0.85	0.62	0.77	0.89	0.9	0.5	TRUE	TRUE	TRUE	FALSE	TRUE	gccgaattgctttcctaaaggac	g
chr9:130258106:130258355:+@chr9:130259298:130259537:+@chr9:130261667:130261757:+	ODF2	ENSG00000136811	0.37	0.26	0.4	0.55	0.43	0.25	TRUE	TRUE	TRUE	FALSE	TRUE	ATTTCCCCCTACTTTGGCAGGAC	G
chr9:133357377:133357468:+@chr9:133359613:133359694:+@chr9:133360948:133365396:+	BAT2L	ENSG00000130723	0.54	0.23	0.4	0.54	0.6	0.27	TRUE	TRUE	TRUE	FALSE	TRUE	CCTGCCTTTGGTTTTTTCAGGCC	G
chr9:168816:169075:-@chr9:167723:167820:-@chr9:165698:165784:-	CBWD1	ENSG00000147996	0.15	0.04	0.16	0.18	0.12	0.09	TRUE	TRUE	TRUE	FALSE	TRUE	TTTTTGGCGTTTCCCCACAGTTA	T
chr9:34319504:34319597:+@chr9:34326227:34326339:+@chr9:34328711:34328845:+	NUDT2	ENSG00000164978	0.23	0.04	0.26	0.49	0.27	0.12	TRUE	TRUE	TRUE	FALSE	TRUE	CTTTTTGAGCATCTTTATAGGGA	G
chr9:36641743:36641874:+@chr9:36647238:36647360:+@chr9:36655347:36655578:+	MELK	ENSG00000165304	0.72	0.83	0.63	0.44	0.55	0.8	TRUE	TRUE	TRUE	FALSE	FALSE	TTCTGTCTTTCATTGAGTAGTCA	T
chr9:80122412:80122540:+@chr9:80132787:80132924:+@chr9:80133717:80134829:+	PSAT1	ENSG00000135069	0.95	0.8	0.93	0.92	0.92	0.82	TRUE	TRUE	TRUE	FALSE	TRUE	ATAATAAACATGTTTTTCAGTTG	T
chrX:102356676:102356822:+@chrX:102357266:102357348:+@chrX:102357733:102358784:+	BEX4	ENSG00000102409	0.84	0.46	0.76	0.71	0.65	0.5	TRUE	TRUE	TRUE	FALSE	TRUE	CACTTCCCCCACCCCGGCAGTCT	T
chrX:102826755:102826844:-@chrX:102826265:102826313:-@chrX:102820083:102820184:-	MORF4L2	ENSG00000123562	0.36	0.13	0.33	0.47	0.34	0.11	TRUE	TRUE	TRUE	FALSE	TRUE	taatagttcctacttcataggat	g
chrX:102826755:102826844:-@chrX:102826265:102826313:-@chrX:102820083:102820235:-	MORF4L2	ENSG00000123562	0.31	0.18	0.42	0.67	0.49	0.14	TRUE	TRUE	TRUE	FALSE	TRUE	taatagttcctacttcataggat	g
chrX:152387798:152387913:-@chrX:152383640:152383707:-@chrX:152381262:152381323:-	UCHL5IP	ENSG00000213397	0.88	0.75	0.89	0.93	0.95	0.84	TRUE	TRUE	TRUE	FALSE	TRUE	GCTCTGCTGTTTCCCTGCAGGGT	G
chrX:44804211:44804345:+@chrX:44804798:44804953:+@chrX:44805513:44805608:+	UTX	ENSG00000147050	0.51	0.17	0.42	0.44	0.4	0.14	TRUE	TRUE	TRUE	FALSE	TRUE	CTTCCTTCTGTGATTCTTAGGCA	G
chrX:71631731:71631843:-@chrX:71627504:71627581:-@chrX:71625508:71625616:-	HDAC8	ENSG00000147099	0.79	0.68	0.85	0.89	0.89	0.66	TRUE	TRUE	TRUE	FALSE	TRUE	GATGTTTCTTTATCTGTTAGGTG	G
chr1:149554673:149555609:-@chr1:149549311:149549355:-@chr1:149546674:149546901:-	PI4KB	ENSG00000143393	0.05	0.16	0.1	0.12	0.09	0.08	FALSE	FALSE	FALSE	TRUE	FALSE	gccctctggccctttcccAGGAG	G
chr1:211255578:211255791:-@chr1:211253058:211253383:-@chr1:211248175:211248431:-	ANGEL2	ENSG00000174606	0.85	0.71	0.77	0.63	0.7	0.89	FALSE	FALSE	FALSE	TRUE	TRUE	AGTGTATTTATTTCTTTTAGATA	A
chr1:21201793:21201888:-@chr1:21196681:21196713:-@chr1:21180128:21180307:-	hsa-mir-1256	ENSG00000221808	0.04	0.16	0.07	0.1	0.06	0.04	FALSE	FALSE	FALSE	TRUE	FALSE	GTTTTCCCTCCTTTTCTCAGTTT	T
chr1:234806142:234806300:-@chr1:234804584:234804826:-@chr1:234804125:234804256:-	HEATR1	ENSG00000119285	0.99	0.75	0.86	0.74	0.79	0.92	FALSE	FALSE	FALSE	TRUE	TRUE	CTAAGTCTTTGGATCTTTAGATG	A
chr1:45844741:45844850:+@chr1:45845580:45846596:+@chr1:45851428:45851507:+	NASP	ENSG00000132780	0.65	0.47	0.55	0.46	0.42	0.64	FALSE	FALSE	FALSE	TRUE	TRUE	CATGTTCTTTAACCATGTAGAGG	A
chr1:46821487:46821588:-@chr1:46818789:46818886:-@chr1:46814834:46814913:-	MKNK1	ENSG00000079277	0.97	0.83	0.9	0.95	0.77	0.96	FALSE	FALSE	FALSE	TRUE	TRUE	CTCATCCATTTCACCTCTAGATA	A
chr1:92504564:92504637:-@chr1:92502699:92502783:-@chr1:92501768:92501877:-	GLMN	ENSG00000174842	0.98	0.85	0.94	0.88	0.94	0.96	FALSE	FALSE	FALSE	TRUE	TRUE	ATTGTAATTTTGCTTTCAAGGTG	G
chr10:111880111:111880234:+@chr10:111882053:111882148:+@chr10:111883074:111885313:+	ADD3	ENSG00000148700	0.61	0.38	0.45	0.16	0.19	0.79	FALSE	FALSE	FALSE	TRUE	TRUE	ACTAAACTCTTATCCAACAGATG	A
chr10:70331040:70331233:+@chr10:70335988:70336099:+@chr10:70336473:70336769:+	DDX50	ENSG00000107625	0.3	0.17	0.2	0.13	0.12	0.49	FALSE	FALSE	FALSE	TRUE	TRUE	aaaaaactttcggttttcagagc	a
chr11:28274876:28275054:+@chr11:28306218:28306288:+@chr11:28308519:28311630:+	METT5D1	ENSG00000169519	0.19	0.02	0.1	0.03	0.06	0.42	FALSE	FALSE	FALSE	TRUE	TRUE	ATGTTTGTTCATATTCTTAGAAT	A
chr11:496609:496821:-@chr11:494824:494996:-@chr11:492062:492249:-	RNH1	ENSG00000023191	0.71	0.81	0.75	0.92	0.86	0.61	FALSE	FALSE	FALSE	TRUE	FALSE	AACATGCTTCCCGAGCTCAGGCA	G
chr11:66965172:66965291:-@chr11:66964749:66964883:-@chr11:66964382:66964486:-	CORO1B	ENSG00000172725	0.07	0.18	0.14	0.11	0.1	0.03	FALSE	FALSE	FALSE	TRUE	FALSE	ACCACCCACTGCCTGCACAGGGC	G
chr11:68088347:68088476:+@chr11:68091058:68091210:+@chr11:68093792:68093941:+	SAPS3	ENSG00000110075	0.99	0.88	0.96	0.58	0.67	0.98	FALSE	FALSE	FALSE	TRUE	TRUE	GAAAGCTTTTTCTTCTTCAGAAA	A
chr12:103204857:103205254:+@chr12:103206839:103206948:+@chr12:103229198:103229320:+	TXNRD1	ENSG00000198431	0.93	0.76	0.86	0.86	0.88	0.95	FALSE	FALSE	FALSE	TRUE	TRUE	TCTGCTTTTGTGCCACACAGAGG	A
chr12:108498186:108498333:+@chr12:108501990:108502134:+@chr12:108508210:108508313:+	MVK	ENSG00000110921	0.84	0.73	0.78	0.78	0.68	0.9	FALSE	FALSE	FALSE	TRUE	TRUE	CTTGTTTGCCTGTGGAACAGAGC	A
chr12:47359705:47359883:-@chr12:47359086:47359200:-@chr12:47351849:47352012:-	C12orf41	ENSG00000139620	0.79	0.69	0.72	0.45	0.53	0.82	FALSE	FALSE	FALSE	TRUE	TRUE	CTCTCCCTTCCTTGCCTCAGATG	A
chr14:103215474:103215635:+@chr14:103221076:103221126:+@chr14:103223171:103223301:+	KLC1	ENSG00000126214	0.2	0.09	0.19	0.05	0.05	0.4	FALSE	FALSE	FALSE	TRUE	TRUE	gttatttttccattttaaagatg	a
chr14:22489363:22489459:-@chr14:22486917:22487062:-@chr14:22486650:22486780:-	C14orf94	ENSG00000092036	0.77	0.6	0.67	0.23	0.37	0.86	FALSE	FALSE	FALSE	TRUE	TRUE	TCCTCTGCCCCTTTGCTCAGATG	A
chr14:34331732:34331878:-@chr14:34325083:34325178:-@chr14:34324734:34324958:-	BAZ1A	ENSG00000198604	0.78	0.66	0.74	0.31	0.54	0.84	FALSE	FALSE	FALSE	TRUE	TRUE	AAGTATTTATTTCCTTAAAGATT	A
chr14:38661385:38661498:+@chr14:38663947:38663991:+@chr14:38667235:38667303:+	SIP1	ENSG00000092208	0.91	0.76	0.85	0.44	0.61	0.89	FALSE	FALSE	FALSE	TRUE	TRUE	AGTCTCATTTTTTCTTTCAGATT	A
chr14:63076000:63076163:-@chr14:62990160:62990356:-@chr14:62958464:62958565:-	PPP2R5E	ENSG00000154001	0.9	0.52	0.65	0.39	0.43	0.86	FALSE	FALSE	FALSE	TRUE	TRUE	ATTTCCTTTTTTTTTCTTAGACG	A
chr14:73836606:73836724:-@chr14:73836004:73836131:-@chr14:73834386:73834525:-	ABCD4	ENSG00000119688	0.65	0.53	0.45	0.33	0.26	0.88	FALSE	FALSE	FALSE	TRUE	TRUE	ACTCCTCTCCCTCCTTTCAGAGC	A
chr14:91006934:91007092:-@chr14:91002358:91002513:-@chr14:91001347:91001516:-	SMEK1	ENSG00000100796	0.45	0.24	0.3	0.11	0.1	0.37	FALSE	FALSE	FALSE	TRUE	TRUE	TCCTCTGCCTTCCCACCCAGAAA	A
chr14:99911373:99911680:-@chr14:99910226:99910355:-@chr14:99905177:99905348:-	WARS	ENSG00000140105	0.3	0.12	0.14	0.15	0.15	0.69	FALSE	FALSE	FALSE	TRUE	TRUE	ACTGCATTTCTTTGTTTCAGAGT	A
chr15:55330840:55330913:+@chr15:55331911:55331982:+@chr15:55332752:55332958:+	TCF12	ENSG00000140262	0.15	0.04	0.04	0.01	0.03	0.25	FALSE	FALSE	FALSE	TRUE	TRUE	TTCTGTCTTGACTTTGCCAGAAA	A
chr15:63780443:63780584:-@chr15:63779936:63780064:-@chr15:63776659:63776775:-	DENND4A	ENSG00000174485	0.22	0.1	0.14	0.02	0.05	0.6	FALSE	FALSE	FALSE	TRUE	TRUE	CAAATTGTGTTCTTAAGCAGATG	A
chr16:1776539:1776657:+@chr16:1776759:1776957:+@chr16:1777679:1777833:+	NUBP2	ENSG00000095906	0.45	0.56	0.57	0.66	0.47	0.41	FALSE	FALSE	FALSE	TRUE	FALSE	GGCTGTGCCGCTCCTTGCAGGTG	G
chr16:24849606:24850226:-@chr16:24846506:24846554:-@chr16:24838213:24839082:-	ARHGAP17	ENSG00000140750	0.29	0.13	0.2	0.09	0.17	0.34	FALSE	FALSE	FALSE	TRUE	TRUE	cattttattaaataatttaGATG	A
chr16:727187:727330:-@chr16:726267:726399:-@chr16:724738:724872:-	NARFL	ENSG00000103245	0.95	0.81	0.9	0.73	0.79	0.99	FALSE	FALSE	FALSE	TRUE	TRUE	GTCTTCCCCTTGCTTTGCAGATG	A
chr16:84254451:84254721:+@chr16:84256122:84256235:+@chr16:84257083:84257454:+	KIAA0182	ENSG00000131149	0.98	0.85	0.93	0.88	0.92	0.99	FALSE	FALSE	FALSE	TRUE	TRUE	TCAGGCTGCTTTTCTCATAGACA	A
chr17:37427943:37428016:+@chr17:37428114:37428184:+@chr17:37429198:37431182:+	NKIRAS2	ENSG00000168256	0.9	0.74	0.79	0.82	0.7	0.91	FALSE	FALSE	FALSE	TRUE	TRUE	CGTCCTGGTCTATAGCACAGATA	A
chr17:5266813:5266873:+@chr17:5270015:5270126:+@chr17:5276586:5276920:+	AC004148.1	ENSG00000215099	0.32	0.21	0.2	0.09	0.08	0.44	FALSE	FALSE	FALSE	TRUE	TRUE	CAACTGCCTTTGCCTTGCAGAGC	A
chr19:46635963:46636159:-@chr19:46634123:46634217:-@chr19:46631282:46631418:-	ATP5SL	ENSG00000105341	0.65	0.34	0.41	0.13	0.3	0.51	FALSE	FALSE	FALSE	TRUE	TRUE	AGCTACCATTTTCTCTGCAGATC	A
chr19:46635963:46636159:-@chr19:46634137:46634217:-@chr19:46631282:46631418:-	ATP5SL	ENSG00000105341	0.8	0.5	0.61	0.26	0.51	0.71	FALSE	FALSE	FALSE	TRUE	TRUE	AGCTACCATTTTCTCTGCAGATC	A
chr2:130638417:130638488:-@chr2:130635229:130635315:-@chr2:130631294:130631439:-	SMPD4	ENSG00000136699	0.14	0.42	0.28	0.29	0.31	0.22	FALSE	FALSE	FALSE	TRUE	FALSE	CTCTCTGTTTCTTATCTCAGCTG	C
chr2:170605638:170605741:+@chr2:170620216:170620340:+@chr2:170625835:170625942:+	UBR3	ENSG00000144357	0.98	0.85	0.94	0.92	0.95	0.97	FALSE	FALSE	FALSE	TRUE	TRUE	TGATTTTTTTTCTCTTGCAGACC	A
chr2:174821426:174821611:-@chr2:174819685:174819789:-@chr2:174802282:174802425:-	AC013467.8-1	ENSG00000208199	0.76	0.36	0.53	0.24	0.27	0.57	FALSE	FALSE	FALSE	TRUE	TRUE	TGTTTGCTTTGGTATTTCAGATG	A
chr2:174821426:174821611:-@chr2:174819689:174819789:-@chr2:174802282:174802425:-	AC013467.8-1	ENSG00000208199	0.8	0.42	0.61	0.3	0.36	0.65	FALSE	FALSE	FALSE	TRUE	TRUE	TGTTTGCTTTGGTATTTCAGATG	A
chr2:200992218:200992464:+@chr2:201012090:201012296:+@chr2:201013617:201013752:+	AC012459.1	ENSG00000196141	0.41	0.22	0.33	0.13	0.13	0.55	FALSE	FALSE	FALSE	TRUE	TRUE	TATTTGGTGTTTTCTTACAGAAG	A
chr2:63059827:63059974:+@chr2:63068570:63068677:+@chr2:63071355:63071479:+	EHBP1	ENSG00000115504	0.74	0.63	0.76	0.18	0.36	0.86	FALSE	FALSE	FALSE	TRUE	TRUE	ATTGCTACATGTTCCTACAGATG	A
chr2:9532121:9532227:+@chr2:9533567:9533619:+@chr2:9535802:9535950:+	IAH1	ENSG00000134330	0.81	0.94	0.93	0.95	0.96	0.82	FALSE	FALSE	FALSE	TRUE	FALSE	ATGGGCTTTTCTTCCTCCAGTTT	T
chr20:61315661:61315740:-@chr20:61304084:61305604:-@chr20:61297227:61298531:-	YTHDF1	ENSG00000149658	0.77	0.55	0.62	0.41	0.44	0.75	FALSE	FALSE	FALSE	TRUE	TRUE	TGTCACGTTTGCTTTTGCAGAGT	A
chr22:28407428:28407590:+@chr22:28409009:28409053:+@chr22:28420741:28424589:+	NF2	ENSG00000186575	0.23	0.34	0.3	0.25	0.2	0.12	FALSE	FALSE	FALSE	TRUE	FALSE	ATTTTATTTTGCTGGTTTAGCCT	C
chr3:185044713:185044808:-@chr3:185042780:185042929:-@chr3:185041052:185041122:-	PARL	ENSG00000175193	0.73	0.47	0.6	0.31	0.44	0.82	FALSE	FALSE	FALSE	TRUE	TRUE	TATGTTTCTCTCTCTTGTAGAGG	A
chr3:20193097:20193155:-@chr3:20190745:20191551:-@chr3:20187539:20187728:-	SGOL1	ENSG00000129810	0.54	0.42	0.46	0.28	0.27	0.64	FALSE	FALSE	FALSE	TRUE	TRUE	TTTATTTTTTAAATTCTCAGATC	A
chr3:47887352:47887599:-@chr3:47883740:47883832:-@chr3:47873925:47874006:-	MAP4	ENSG00000047849	0.84	0.98	0.94	0.98	0.92	0.79	FALSE	FALSE	FALSE	TRUE	FALSE	TCTATTTTCTAACACTCCAGGTC	G
chr3:88189859:88190063:-@chr3:88189031:88189132:-@chr3:88183790:88187839:-	CGGBP1	ENSG00000163320	0.23	0.12	0.17	0.07	0.07	0.48	FALSE	FALSE	FALSE	TRUE	TRUE	GACTTTATCGTACTTTTCAGAAT	A
chr4:77270833:77270926:-@chr4:77264826:77264933:-@chr4:77258252:77258371:-	NUP54	ENSG00000138750	0.88	0.77	0.83	0.52	0.73	0.91	FALSE	FALSE	FALSE	TRUE	TRUE	CCCAATTTTTTTTTAAACAGATC	A
chr4:83495481:83495578:-@chr4:83495072:83495178:-@chr4:83493491:83494331:-	HNRNPD	ENSG00000138668	0.2	0.41	0.31	0.65	0.38	0.1	FALSE	FALSE	FALSE	TRUE	FALSE	ACCTTGTTTGTACCCGCCAGCGG	C
chr5:141328806:141328916:+@chr5:141330453:141330626:+@chr5:141333332:141333491:+	RNF14	ENSG00000013561	0.93	0.81	0.91	0.63	0.83	0.95	FALSE	FALSE	FALSE	TRUE	TRUE	TTTGTATTTCTTTTCTGCAGATG	A
chr5:162824307:162824386:+@chr5:162827285:162827332:+@chr5:162829225:162829413:+	HMMR	ENSG00000072571	0.35	0.2	0.26	0.05	0.12	0.56	FALSE	FALSE	FALSE	TRUE	TRUE	TTTTTTTGGCTTTTAAACAGAAG	A
chr5:162824307:162824386:+@chr5:162827288:162827332:+@chr5:162829225:162829413:+	HMMR	ENSG00000072571	0.2	0.09	0.13	0.02	0.06	0.28	FALSE	FALSE	FALSE	TRUE	TRUE	TTTTGGCTTTTAAACAGAAGGAA	G
chr5:176330349:176330473:-@chr5:176329208:176329313:-@chr5:176317700:176317761:-	UIMC1	ENSG00000087206	0.98	0.78	0.86	0.56	0.71	0.91	FALSE	FALSE	FALSE	TRUE	TRUE	TATGGGATCACTTGTTTCAGAGT	A
chr5:65485047:65485180:+@chr5:65490393:65490516:+@chr5:65490803:65490918:+	SFRS12	ENSG00000153914	0.45	0.27	0.34	0.14	0.16	0.57	FALSE	FALSE	FALSE	TRUE	TRUE	GATGTTCTGTGTGCTATTAGTGA	T
chr5:68454782:68455008:+@chr5:68459587:68459715:+@chr5:68461030:68461636:+	SLC30A5	ENSG00000145740	0.93	0.82	0.88	0.78	0.83	0.91	FALSE	FALSE	FALSE	TRUE	TRUE	TCACCTCTTTTATTTGACAGATA	A
chr6:111759572:111759680:-@chr6:111758082:111758208:-@chr6:111757428:111757634:-	REV3L	ENSG00000009413	0.19	0.03	0.09	0.01	0.04	0.47	FALSE	FALSE	FALSE	TRUE	TRUE	CTATTCATCCCCTCTTCCAGATT	A
chr6:112514452:112514504:-@chr6:112512085:112512142:-@chr6:112508988:112509103:-	TUBE1	ENSG00000074935	0.62	0.48	0.54	0.38	0.35	0.86	FALSE	FALSE	FALSE	TRUE	TRUE	CTCATTTTTTTATCTTTCAGAGT	A
chr6:127706174:127706447:-@chr6:127693647:127693868:-@chr6:127689840:127689982:-	ECHDC1	ENSG00000093144	0.96	0.85	0.91	0.77	0.87	0.93	FALSE	FALSE	FALSE	TRUE	TRUE	TACTTATTTCTGTTTTCCAGAAA	A
chr6:136630993:136631170:-@chr6:136629860:136630006:-@chr6:136624096:136624308:-	BCLAF1	ENSG00000029363	0.5	0.28	0.35	0.26	0.25	0.62	FALSE	FALSE	FALSE	TRUE	TRUE	ACTTTGTTAATGTTAATCAGTTT	T
chr6:161507270:161507439:-@chr6:161506599:161506735:-@chr6:161495171:161495332:-	AGPAT4	ENSG00000026652	0.6	0.23	0.32	0.28	0.18	0.42	FALSE	FALSE	FALSE	TRUE	TRUE	TTTTTTTTTTTCCCAACTAGTTT	T
chr6:167344291:167344371:+@chr6:167346986:167347045:+@chr6:167355887:167356113:+	FGFR1OP	ENSG00000213066	0.25	0.1	0.14	0.04	0.08	0.28	FALSE	FALSE	FALSE	TRUE	TRUE	CATTTTATTCTCATGCTCAGATA	A
chr6:76463861:76463953:+@chr6:76469081:76469508:+@chr6:76475963:76476066:+	SENP6	ENSG00000112701	0.74	0.5	0.61	0.62	0.59	0.76	FALSE	FALSE	FALSE	TRUE	TRUE	ATTTCATTTGTTTTTTACAGTGC	T
chr6:8373169:8373290:-@chr6:8367702:8367856:-@chr6:8365953:8366060:-	SLC35B3	ENSG00000124786	0.7	0.55	0.63	0.21	0.33	0.92	FALSE	FALSE	FALSE	TRUE	TRUE	TTAAAAATTGTCTTTTACAGAAT	A
chr7:150356443:150356630:+@chr7:150361625:150361937:+@chr7:150362293:150362448:+	ABCB8	ENSG00000197150	0.93	0.81	0.75	0.82	0.86	0.97	FALSE	FALSE	FALSE	TRUE	TRUE	ATGCCTCTCTCTCCTTACAGGTA	G
chr7:65877649:65877815:+@chr7:65886097:65886263:+@chr7:65897933:65898014:+	RABGEF1	ENSG00000154710	0.76	0.63	0.67	0.3	0.38	0.93	FALSE	FALSE	FALSE	TRUE	TRUE	ATGTTTAATTTTCCCAGCAGAAA	A
chr7:75471012:75471109:-@chr7:75468144:75468256:-@chr7:75463591:75463853:-	STYXL1	ENSG00000127952	0.83	0.7	0.76	0.69	0.61	0.85	FALSE	FALSE	FALSE	TRUE	TRUE	CCCCCCACTTCTTTTTGCAGAAA	A
chr7:75489105:75489246:-@chr7:75480996:75481141:-@chr7:75472513:75472658:-	STYXL1	ENSG00000127952	0.64	0.53	0.61	0.38	0.5	0.84	FALSE	FALSE	FALSE	TRUE	TRUE	TCTTTGGTCTCCACTCTCAGATC	A
chr8:17148851:17149249:+@chr8:17167787:17167861:+@chr8:17170138:17170252:+	VPS37A	ENSG00000155975	0.96	0.82	0.96	0.96	0.93	0.98	FALSE	FALSE	FALSE	TRUE	TRUE	TTTAAAATTTTCTCCTGCAGTAT	T
chr9:138427083:138427165:+@chr9:138428828:138428920:+@chr9:138430564:138430664:+	PMPCA	ENSG00000165688	0.98	0.85	0.96	0.66	0.88	0.97	FALSE	FALSE	FALSE	TRUE	TRUE	GCTTGTGTTTTCTTCCAGAGACA	A
chr9:139579358:139579427:-@chr9:139579166:139579231:-@chr9:139578707:139578879:-	WDR85	ENSG00000148399	0.75	0.41	0.58	0.46	0.3	0.73	FALSE	FALSE	FALSE	TRUE	TRUE	GAAGCCGCCTCTGCTTGCAGACA	A
chr9:99487026:99487143:-@chr9:99484303:99484533:-@chr9:99477012:99477690:-	XPA	ENSG00000136936	0.42	0.2	0.22	0.06	0.12	0.65	FALSE	FALSE	FALSE	TRUE	TRUE	TTCTTGTTGATTTACTTTAGAGG	A
chrX:107255963:107256073:+@chrX:107256679:107256980:+@chrX:107258667:107258738:+	ATG4A	ENSG00000101844	0.14	0.03	0.06	0.02	0.03	0.2	FALSE	FALSE	FALSE	TRUE	TRUE	TTACCATTACATTCTTATAGATT	A
chrX:153437574:153437785:+@chrX:153439941:153440059:+@chrX:153443097:153443193:+	IKBKG	ENSG00000073009	0.97	0.83	0.87	0.39	0.62	0.98	FALSE	FALSE	FALSE	TRUE	TRUE	AGTGGCTTTTTATCCTGCAGCAG	C
chrX:154783355:154783445:+@chrX:154802671:154802738:+@chrX:154822559:154822651:+	VAMP7	ENSG00000124333	0.83	0.69	0.68	0.6	0.58	0.88	FALSE	FALSE	FALSE	TRUE	TRUE	TACTTTTCCAATATTTTCAGATC	A
chrX:70691088:70691167:+@chrX:70691765:70691960:+@chrX:70692529:70692669:+	OGT	ENSG00000147162	0.86	0.73	0.72	0.48	0.5	0.9	FALSE	FALSE	FALSE	TRUE	TRUE	gtgtgtgtgtTTATTTACAGAGC	A
chrY:57642555:57642645:+@chrY:57661871:57661938:+@chrY:57681759:57681851:+	N/A	N/A	0.84	0.7	0.68	0.61	0.58	0.88	FALSE	FALSE	FALSE	TRUE	TRUE	TACTTTTCCAATATTTTCAGATC	A
chr1:240078656:240078952:+@chr1:240079037:240079141:+@chr1:240080334:240080511:+	EXO1	ENSG00000174371	0.24	0.11	0.17	0.04	0.24	0.22	FALSE	FALSE	TRUE	TRUE	TRUE	TTAAAATTCATTCACAGCAGAAC	A
chr12:49790927:49791033:-@chr12:49789171:49789323:-@chr12:49787286:49787396:-	TFCP2	ENSG00000135457	0.99	0.87	0.96	0.97	0.97	0.98	FALSE	FALSE	TRUE	TRUE	TRUE	TGCTGTTGTATTCTTTTCAGGTG	G
chr16:29919751:29919862:+@chr16:29920236:29920352:+@chr16:29924043:29924613:+	INO80E	ENSG00000169592	0.85	0.96	0.98	0.94	0.85	0.71	FALSE	FALSE	TRUE	TRUE	FALSE	atccccgctcccgcccgcagctg	c
chr8:75046866:75047076:-@chr8:75034554:75034607:-@chr8:75030700:75030843:-	TCEB1	ENSG00000154582	0.91	0.74	0.84	0.84	0.94	0.86	FALSE	FALSE	TRUE	TRUE	TRUE	TGATATTGTTATATTTTCAGGAA	G
chr13:36484329:36484434:-@chr13:36482689:36482792:-@chr13:36481451:36481946:-	FAM48A	ENSG00000102710	0.58	0.32	0.37	0.53	0.32	0.52	FALSE	TRUE	FALSE	TRUE	TRUE	TCCCCTTCTCCTCTCTGTAGTGT	T
chr17:3514722:3514841:-@chr17:3514238:3514315:-@chr17:3512936:3513928:-	TAX1BP3	ENSG00000213977	0.91	0.8	0.81	0.9	0.89	0.93	FALSE	TRUE	FALSE	TRUE	TRUE	CTTGGGCTGCCCCTTTCCAGGGT	G
chr5:64894819:64895089:+@chr5:64895386:64895422:+@chr5:64899096:64899198:+	PPWD1	ENSG00000113593	0.03	0.17	0.09	0.02	0.14	0.03	FALSE	TRUE	FALSE	TRUE	FALSE	CTCTCATTTACTCCCCACAGCAG	C
chr6:43004838:43005437:+@chr6:43010191:43010314:+@chr6:43011290:43011386:+	CNPY3	ENSG00000137161	0.88	0.76	0.83	0.89	0.89	0.94	FALSE	TRUE	FALSE	TRUE	TRUE	GTGCTACCTCCCTCCCCCAGTGT	T
chr7:75471012:75471109:-@chr7:75468144:75468208:-@chr7:75463591:75463853:-	STYXL1	ENSG00000127952	0.71	0.52	0.57	0.68	0.57	0.67	FALSE	TRUE	FALSE	TRUE	TRUE	TCTGATCTTTTCCACCCAAGGTA	G
chr9:35068602:35068733:-@chr9:35068138:35068340:-@chr9:35067261:35067396:-	FANCG	ENSG00000221829	0.88	0.73	0.75	0.94	0.79	0.86	FALSE	TRUE	FALSE	TRUE	TRUE	TGTGTGTGTATACTCTACAGTGC	T
chr1:149479055:149479139:+@chr1:149481223:149481369:+@chr1:149481538:149481667:+	PIP5K1A	ENSG00000143398	0.95	0.79	0.85	0.92	0.91	0.97	FALSE	TRUE	TRUE	TRUE	TRUE	TCTCTCTTTCCCTTTTGAAGTGA	T
chr1:41275621:41275800:-@chr1:41272242:41272307:-@chr1:41266843:41266985:-	SCMH1	ENSG00000010803	0.4	0.22	0.27	0.55	0.49	0.47	FALSE	TRUE	TRUE	TRUE	TRUE	ccaacctggtctttccacaggag	g
chr10:126097432:126097509:-@chr10:126090532:126090759:-@chr10:126087300:126087524:-	OAT	ENSG00000065154	0.99	0.85	0.91	1	1	1	FALSE	TRUE	TRUE	TRUE	TRUE	ATTCTCTTTTCTTTGGACAGATC	A
chr14:30161272:30161356:+@chr14:30167166:30167236:+@chr14:30169434:30169522:+	SCFD1	ENSG00000092108	0.81	0.62	0.74	0.87	0.88	0.89	FALSE	TRUE	TRUE	TRUE	TRUE	ATAAAACTTTTTATTTTCAGTGG	T
chr16:14999698:14999763:+@chr16:15003134:15003214:+@chr16:15005545:15005691:+	PDXDC1	ENSG00000179889	0.82	0.58	0.65	0.75	0.74	0.77	FALSE	TRUE	TRUE	TRUE	TRUE	CAACTCTTTTTATTCTGCAGTGG	T
chr17:64020138:64020284:+@chr17:64022723:64022855:+@chr17:64023130:64023312:+	PRKAR1A	ENSG00000108946	0.21	0.01	0.07	0.26	0.19	0.16	FALSE	TRUE	TRUE	TRUE	TRUE	TGACTTGCTTTCGCTTACAGTTG	T
chr2:203975544:203975702:+@chr2:203984253:203984339:+@chr2:203989876:203990049:+	ABI2	ENSG00000138443	0.45	0.31	0.4	0.61	0.46	0.51	FALSE	TRUE	TRUE	TRUE	TRUE	CACCTTTTTTGTTTTTGCAGTAT	T
chr2:219232704:219232767:+@chr2:219233274:219233388:+@chr2:219233906:219234274:+	BCS1L	ENSG00000074582	0.25	0.13	0.2	0.27	0.25	0.32	FALSE	TRUE	TRUE	TRUE	TRUE	TGAGTTTATACCCAATTCAGGGG	G
chr2:96769318:96769540:-@chr2:96767413:96767531:-@chr2:96763873:96763990:-	LMAN2L	ENSG00000114988	0.95	0.76	0.86	0.99	0.95	0.9	FALSE	TRUE	TRUE	TRUE	TRUE	GATCTACTTCCTTCCTGTAGGTG	G
chr3:15596421:15596556:-@chr3:15591488:15591593:-@chr3:15589670:15589753:-	HACL1	ENSG00000131373	0.76	0.6	0.71	0.82	0.84	0.81	FALSE	TRUE	TRUE	TRUE	TRUE	CATATCAATTTTTTTAATAGGGC	G
chr3:50112419:50112488:+@chr3:50112969:50113042:+@chr3:50115520:50115603:+	RBM5	ENSG00000003756	0.84	0.61	0.71	0.94	0.88	0.79	FALSE	TRUE	TRUE	TRUE	TRUE	TATCTGAATGCTGTCTCTAGGTG	G
chr5:122968317:122968423:+@chr5:122968932:122968955:+@chr5:122977935:122980637:+	CSNK1G3	ENSG00000151292	0.07	0.25	0.28	0.08	0.08	0.06	FALSE	TRUE	TRUE	TRUE	FALSE	TTTTTTGTGTGTGCGTATAGCTG	C
chr6:33398617:33398771:-@chr6:33397474:33397729:-@chr6:33396491:33397322:-	DAXX	ENSG00000204209	0.68	0.57	0.66	0.77	0.81	0.95	FALSE	TRUE	TRUE	TRUE	TRUE	GCCCCATCCCCTTCCAGCAGGAA	G
chr6:33398617:33398771:-@chr6:33397474:33397732:-@chr6:33396491:33397322:-	DAXX	ENSG00000204209	0.74	0.61	0.74	0.89	0.84	0.98	FALSE	TRUE	TRUE	TRUE	TRUE	GAGGCCCCATCCCCTTCCAGCAG	C
chr7:149697693:149697890:+@chr7:149698782:149698906:+@chr7:149699250:149702066:+	REPIN1	ENSG00000214022	0.23	0.06	0.13	0.16	0.26	0.28	FALSE	TRUE	TRUE	TRUE	TRUE	ttgcttcatctgttaaacaggga	g
chr7:43645573:43645805:-@chr7:43638349:43639532:-@chr7:43637136:43637906:-	C7orf44	ENSG00000106603	0.22	0.08	0.12	0.21	0.2	0.19	FALSE	TRUE	TRUE	TRUE	TRUE	gtctttctcccacttttcaggcc	g
chr7:64853527:64853700:+@chr7:64854586:64854732:+@chr7:64858202:64858374:+	SNORA22	ENSG00000206634	0.28	0.1	0.19	0.37	0.21	0.2	FALSE	TRUE	TRUE	TRUE	TRUE	GATTTCTGTCCCTTAAACAGTCT	T
chr7:64862846:64862978:+@chr7:64864068:64864170:+@chr7:64865369:64865442:+	N/A	N/A	0.36	0.19	0.21	0.46	0.53	0.3	FALSE	TRUE	TRUE	TRUE	TRUE	ATTAAATTTGTTTACTTTAGGTT	G
chr1:159577008:159577069:+@chr1:159593091:159593254:+@chr1:159598743:159601159:+	SDHC	ENSG00000143252	0.81	0.71	0.73	0.77	0.72	0.59	FALSE	FALSE	FALSE	FALSE	TRUE	CTACTTGGTTTTCTCCTCAGGGG	G
chr1:183542769:183542894:-@chr1:183542240:183542380:-@chr1:183541291:183541398:-	IVNS1ABP	ENSG00000116679	0.42	0.68	0.56	0.77	0.65	0.74	FALSE	FALSE	FALSE	FALSE	FALSE	ATTGATTTATCTCCCCATAGGTT	G
chr1:22277509:22277663:+@chr1:22280802:22280874:+@chr1:22285519:22285628:+	CDC42	ENSG00000070831	0.29	0.16	0.13	0.07	0.09	0.09	FALSE	FALSE	FALSE	FALSE	TRUE	TTGTATTTTTTTGTTTTTAGGTT	G
chr1:23543291:23543440:-@chr1:23539932:23540097:-@chr1:23537570:23537688:-	HNRNPR	ENSG00000125944	0.55	0.45	0.43	0.28	0.38	0.23	FALSE	FALSE	FALSE	FALSE	TRUE	TCCTGAATTTTTTCCAGCAGCAT	C
chr1:23543291:23543440:-@chr1:23539932:23540100:-@chr1:23537570:23537688:-	HNRNPR	ENSG00000125944	0.54	0.44	0.41	0.26	0.38	0.22	FALSE	FALSE	FALSE	FALSE	TRUE	AGCTCCTGAATTTTTTCCAGCAG	C
chr1:29264081:29264257:+@chr1:29296906:29297034:+@chr1:29308435:29308536:+	EPB41	ENSG00000159023	0.96	0.85	0.89	0.81	0.92	0.92	FALSE	FALSE	FALSE	FALSE	TRUE	CTTTCCTTACTGCTTCACAGCCT	C
chr1:85497629:85497913:-@chr1:85497206:85497332:-@chr1:85496795:85496993:-	C1orf52	ENSG00000162642	0.58	0.47	0.49	0.24	0.45	0.33	FALSE	FALSE	FALSE	FALSE	TRUE	CCCCGCCCCCCCCGCTGCAGCTT	C
chr10:111977937:111978069:+@chr10:111994576:111994605:+@chr10:112028928:112029042:+	RP11-549L6.2	ENSG00000218726	0.97	0.83	0.89	0.7	0.86	0.93	FALSE	FALSE	FALSE	FALSE	TRUE	TTTTTTTTTTTGTCTTTTAGATC	A
chr10:129804745:129804790:-@chr10:129803182:129804261:-@chr10:129801681:129801856:-	MKI67	ENSG00000148773	0.42	0.57	0.47	0.61	0.8	0.66	FALSE	FALSE	FALSE	FALSE	FALSE	TTTCATAATTCATTGCCAAGATG	A
chr10:73645764:73645902:+@chr10:73649818:73650143:+@chr10:73653652:73653820:+	Y_RNA	ENSG00000200170	0.18	0.29	0.23	0.29	0.26	0.22	FALSE	FALSE	FALSE	FALSE	FALSE	TTTTCAAAAAACATggccaggtg	g
chr11:101538397:101538512:+@chr11:101561959:101562072:+@chr11:101581834:101582015:+	YAP1	ENSG00000137693	0.82	0.56	0.64	0.71	0.73	0.65	FALSE	FALSE	FALSE	FALSE	TRUE	TTTTTTTTTCTGTATTATAGGTC	G
chr11:18494222:18494287:-@chr11:18492801:18492964:-@chr11:18487665:18487788:-	TSG101	ENSG00000074319	0.9	0.79	0.83	0.83	0.87	0.83	FALSE	FALSE	FALSE	FALSE	TRUE	AGTTTCTATTTCTTTTTCAGGTA	G
chr11:47286718:47286826:+@chr11:47287107:47287169:+@chr11:47287408:47287528:+	MADD	ENSG00000110514	0.01	0.13	0.04	0.08	0.13	0.14	FALSE	FALSE	FALSE	FALSE	FALSE	TCCTGCTCTCAAATTGGCAGGAA	G
chr11:497113:497273:-@chr11:494824:494996:-@chr11:492062:492249:-	RNH1	ENSG00000023191	0.41	0.58	0.58	0.66	0.8	0.53	FALSE	FALSE	FALSE	FALSE	FALSE	AACATGCTTCCCGAGCTCAGGCA	G
chr11:63289855:63290352:-@chr11:63288916:63289302:-@chr11:63287888:63287917:-	AP006289.2	ENSG00000188070	0.22	0.07	0.06	0.03	0.06	0.05	FALSE	FALSE	FALSE	FALSE	TRUE	CTTCCCTCCAACCCTTTCAGGCA	G
chr11:63427109:63427206:+@chr11:63428034:63428195:+@chr11:63428834:63429091:+	MARK2	ENSG00000072518	0.35	0.18	0.22	0.14	0.33	0.12	FALSE	FALSE	FALSE	FALSE	TRUE	CCGCTGCTTTTGTTTCCTAGCCT	C
chr11:64290948:64291127:-@chr11:64289999:64290203:-@chr11:64288654:64289566:-	SF1	ENSG00000168066	0.21	0.06	0.12	0.03	0.03	0.06	FALSE	FALSE	FALSE	FALSE	TRUE	GGGCTTCTTTACCACCCCAGATA	A
chr11:85369820:85369919:-@chr11:85365314:85365373:-@chr11:85363399:85363503:-	PICALM	ENSG00000073921	0.88	0.77	0.84	0.89	0.79	0.59	FALSE	FALSE	FALSE	FALSE	TRUE	TTTTCCTTTCACTATGTTAGGCA	G
chr11:93126750:93126851:+@chr11:93128024:93128200:+@chr11:93130130:93130279:+	C11orf54	ENSG00000182919	0.92	0.61	0.73	0.66	0.66	0.78	FALSE	FALSE	FALSE	FALSE	TRUE	TTGCCTCACTTTCTTTTCAGTTT	T
chr12:108014695:108014975:-@chr12:108012197:108012395:-@chr12:108010376:108010700:-	ALKBH2	ENSG00000189046	0.87	0.76	0.77	0.83	0.79	0.7	FALSE	FALSE	FALSE	FALSE	TRUE	GCCATGTTTCCTCTGCACAGGAG	G
chr12:122400810:122400941:-@chr12:122398529:122398633:-@chr12:122395758:122396070:-	Y_RNA	ENSG00000207189	0.81	0.93	0.92	0.97	0.98	0.92	FALSE	FALSE	FALSE	FALSE	FALSE	TGATGTTGTTTTCTCTCCAGTCA	T
chr12:12564063:12564201:-@chr12:12544720:12544883:-@chr12:12531229:12531388:-	DUSP16	ENSG00000111266	0.97	0.86	0.92	0.91	0.91	0.85	FALSE	FALSE	FALSE	FALSE	TRUE	tttataatGTTTATTCTTAGGTG	G
chr12:41015952:41016043:+@chr12:41031954:41032118:+@chr12:41035230:41035291:+	PPHLN1	ENSG00000134283	0.66	0.84	0.77	0.73	0.77	0.76	FALSE	FALSE	FALSE	FALSE	FALSE	TTTCTTTTTGTCTGTTTTAGGAT	G
chr12:41054932:41055143:+@chr12:41065009:41065065:+@chr12:41067525:41067604:+	PPHLN1	ENSG00000134283	0.75	0.64	0.73	0.25	0.54	0.75	FALSE	FALSE	FALSE	FALSE	TRUE	CCCTGCCCACCTTTCCATAGAGT	A
chr12:63096745:63096801:+@chr12:63098093:63098162:+@chr12:63098923:63099141:+	XPOT	ENSG00000184575	0.97	0.82	0.9	0.77	0.83	0.89	FALSE	FALSE	FALSE	FALSE	TRUE	TTCTTCTCTATTTTGAACAGATA	A
chr13:113338850:113339016:+@chr13:113340134:113340212:+@chr13:113342436:113343506:+	TFDP1	ENSG00000198176	0.88	0.63	0.74	0.41	0.42	0.74	FALSE	FALSE	FALSE	FALSE	TRUE	TATTTTCTTTCCCTTTTCAGAAA	A
chr13:38509335:38510252:-@chr13:38506268:38506333:-@chr13:38503700:38503768:-	C13orf23	ENSG00000120685	0.98	0.86	0.94	0.96	0.95	0.86	FALSE	FALSE	FALSE	FALSE	TRUE	TGTGTGTTTTTTTTTTTTAGGCT	G
chr14:103107713:103107910:+@chr14:103110197:103110260:+@chr14:103123364:103123454:+	C14orf153	ENSG00000127150	0.78	0.94	0.88	0.89	0.91	0.86	FALSE	FALSE	FALSE	FALSE	FALSE	tttttttttttttttttAAGGAA	G
chr14:22491377:22491508:-@chr14:22490604:22490738:-@chr14:22489363:22489459:-	C14orf94	ENSG00000092036	0.98	0.82	0.9	0.94	0.92	0.89	FALSE	FALSE	FALSE	FALSE	TRUE	TTTTATTCTCTCTCTCTCAGTTT	T
chr14:52400869:52401090:-@chr14:52397482:52397502:-@chr14:52396809:52396933:-	PLEKHC1	ENSG00000073712	0.22	0.39	0.3	0.31	0.39	0.31	FALSE	FALSE	FALSE	FALSE	FALSE	CCTCGCATTGCCATCTACAGCCA	C
chr14:64638775:64638980:-@chr14:64638017:64638043:-@chr14:64630179:64630286:-	MAX	ENSG00000125952	0.42	0.63	0.62	0.75	0.61	0.61	FALSE	FALSE	FALSE	FALSE	FALSE	TTTTTTCTCTCTTATTCCAGGAA	G
chr14:74357513:74357593:+@chr14:74360712:74360763:+@chr14:74365669:74365799:+	YLPM1	ENSG00000119596	0.76	0.54	0.57	0.57	0.48	0.53	FALSE	FALSE	FALSE	FALSE	TRUE	TCTCTCTGTGTACGATTTAGGGT	G
chr16:1668279:1668358:+@chr16:1675441:1675589:+@chr16:1681845:1681987:+	C16orf34	ENSG00000206053	0.97	0.86	0.91	0.93	0.95	0.94	FALSE	FALSE	FALSE	FALSE	TRUE	CATGTACTCTGTGCTTGTAGGGC	G
chr16:28410536:28410657:-@chr16:28410304:28410382:-@chr16:28408112:28408208:-	CLN3	ENSG00000188603	0.75	0.64	0.71	0.79	0.83	0.72	FALSE	FALSE	FALSE	FALSE	TRUE	CCCTCTTCTCGCTCTCCCAGGGG	G
chr16:28754755:28754998:+@chr16:28755148:28755312:+@chr16:28755550:28756059:+	ATXN2L	ENSG00000168488	0.34	0.24	0.28	0.32	0.21	0.1	FALSE	FALSE	FALSE	FALSE	TRUE	ACCTGCACCTGTCTGTGAAGTAT	T
chr16:88280577:88280706:+@chr16:88283161:88283233:+@chr16:88284462:88284533:+	CDK10	ENSG00000185324	0.78	0.54	0.51	0.24	0.61	0.21	FALSE	FALSE	FALSE	FALSE	TRUE	GCAACACCCTTCTGTTTCAGCTG	C
chr17:39645713:39645833:-@chr17:39645238:39645348:-@chr17:39644767:39644900:-	UBTF	ENSG00000108312	0.39	0.19	0.24	0.27	0.27	0.24	FALSE	FALSE	FALSE	FALSE	TRUE	TGACGGCTTTTGGTTTGCAGGCC	G
chr17:70688747:70688878:-@chr17:70682442:70682513:-@chr17:70675420:70676091:-	N/A	N/A	0.79	0.68	0.56	0.47	0.32	0.29	FALSE	FALSE	FALSE	FALSE	TRUE	GCTTTTAAATTCTCGTTCAGGGA	G
chr17:73900152:73900341:+@chr17:73903984:73904061:+@chr17:73905928:73906027:+	PGS1	ENSG00000087157	0.87	0.71	0.8	0.73	0.83	0.8	FALSE	FALSE	FALSE	FALSE	TRUE	GAATTTTTCTCCTCTCTCAGGGG	G
chr17:7421869:7421958:+@chr17:7422207:7422286:+@chr17:7422384:7423048:+	SNORA67	ENSG00000207152	0.94	0.74	0.8	0.79	0.77	0.65	FALSE	FALSE	FALSE	FALSE	TRUE	AGTTGTCTTTCTTGACGTAGGCC	G
chr17:8054573:8054608:-@chr17:8054220:8054292:-@chr17:8051781:8051883:-	AURKB	ENSG00000178999	0.62	0.78	0.62	0.82	0.89	0.66	FALSE	FALSE	FALSE	FALSE	FALSE	tgtttcccttctccgcccagctc	c
chr18:46055345:46055413:-@chr18:46054554:46054718:-@chr18:46053932:46054231:-	MBD1	ENSG00000141644	0.4	0.3	0.31	0.22	0.22	0.21	FALSE	FALSE	FALSE	FALSE	TRUE	CATTCCCCCCACCCCAGCAGCCC	C
chr19:40452324:40452442:+@chr19:40452546:40452746:+@chr19:40453190:40453340:+	USF2	ENSG00000105698	0.34	0.22	0.2	0.21	0.16	0.16	FALSE	FALSE	FALSE	FALSE	TRUE	CGCTCTGCCGCCCCCTGCAGGTG	G
chr19:9128944:9129070:+@chr19:9129510:9129751:+@chr19:9130502:9130584:+	ZNF317	ENSG00000130803	0.31	0.13	0.24	0.23	0.2	0.18	FALSE	FALSE	FALSE	FALSE	TRUE	ACTTTTACTGTGTTCCTTAGAAA	A
chr2:101842630:101842758:+@chr2:101846715:101846945:+@chr2:101847824:101847930:+	MAP4K4	ENSG00000071054	0.36	0.16	0.22	0.21	0.27	0.19	FALSE	FALSE	FALSE	FALSE	TRUE	GTGTTTTGTTTTCTTGTAAGGTA	G
chr2:101853189:101853309:+@chr2:101854388:101854579:+@chr2:101856541:101856658:+	MAP4K4	ENSG00000071054	0.62	0.5	0.56	0.39	0.42	0.55	FALSE	FALSE	FALSE	FALSE	TRUE	TGTGCCTGTTTTTTCTACAGAGT	A
chr2:110101846:110102056:+@chr2:110102427:110103668:+@chr2:110109267:110110147:+	AC013268.5-2	ENSG00000204588	0.77	0.96	0.85	0.85	0.84	0.85	FALSE	FALSE	FALSE	FALSE	FALSE	GTCTGGAAATACGTCCTCAGCTG	C
chr2:11523349:11523748:-@chr2:11514756:11514810:-@chr2:11511159:11511375:-	E2F6	ENSG00000169016	0.91	0.63	0.77	0.39	0.69	0.43	FALSE	FALSE	FALSE	FALSE	TRUE	TTTTTTATCTTTTTTTTCAGCCA	C
chr2:152032760:152032906:+@chr2:152033234:152033311:+@chr2:152033401:152033516:+	RIF1	ENSG00000080345	0.57	0.25	0.27	0.08	0.31	0.09	FALSE	FALSE	FALSE	FALSE	TRUE	CTCTCCTTTCTTCTATCTAGCAT	C
chr2:182492268:182492418:+@chr2:182493569:182493622:+@chr2:182494920:182495384:+	SSFA2	ENSG00000138434	0.4	0.28	0.33	0.41	0.43	0.2	FALSE	FALSE	FALSE	FALSE	TRUE	tatTGTTCTTACCTTTTCAGGGA	G
chr2:24114051:24115886:-@chr2:24109203:24109320:-@chr2:24105710:24107536:-	C2orf44	ENSG00000163026	0.96	0.82	0.88	0.81	0.86	0.88	FALSE	FALSE	FALSE	FALSE	TRUE	CTTTTATTTTTTATTTGCAGAAA	A
chr2:241690341:241690420:-@chr2:241685331:241685515:-@chr2:241682365:241682520:-	MTERFD2	ENSG00000122085	0.92	0.74	0.79	0.84	0.77	0.77	FALSE	FALSE	FALSE	FALSE	TRUE	CTTTTTTGAATGTTCTGCAGGGA	G
chr2:46673118:46673226:-@chr2:46668718:46668822:-@chr2:46661917:46662234:-	PIGF	ENSG00000151665	0.37	0.11	0.14	0.02	0.05	0.15	FALSE	FALSE	FALSE	FALSE	TRUE	AATCCTGTCTGACATTTCAGATG	A
chr2:53893590:53893714:+@chr2:53895184:53895261:+@chr2:53895501:53895576:+	C2orf30	ENSG00000068912	0.98	0.87	0.86	0.92	0.94	0.86	FALSE	FALSE	FALSE	FALSE	TRUE	TGTGTGTTTCTCTGATTCAGGAT	G
chr2:96632217:96632326:-@chr2:96631580:96631802:-@chr2:96631107:96631240:-	KIAA1310	ENSG00000114982	0.9	0.79	0.86	0.89	0.78	0.8	FALSE	FALSE	FALSE	FALSE	TRUE	TGGGCTTGTGTGTCCCACAGGCC	G
chr20:28236790:28236915:+@chr20:28239534:28239645:+@chr20:28241888:28241992:+	FRG1B	ENSG00000149531	0.82	0.66	0.8	0.73	0.75	0.6	FALSE	FALSE	FALSE	FALSE	TRUE	TCTATCTTATTAATGTACAGAAT	A
chr20:34783496:34783600:-@chr20:34768789:34768824:-@chr20:34750496:34750601:-	NDRG3	ENSG00000101079	0.94	0.8	0.91	0.84	0.84	0.93	FALSE	FALSE	FALSE	FALSE	TRUE	TTTCTGTCTTCTGTTGACAGAAT	A
chr20:41666237:41666312:+@chr20:41667056:41667127:+@chr20:41675904:41676030:+	IFT52	ENSG00000101052	0.94	0.82	0.87	0.83	0.88	0.86	FALSE	FALSE	FALSE	FALSE	TRUE	TTTAATTTTTCTTCTTCAAGGGA	G
chr21:37532631:37532780:-@chr21:37527533:37527613:-@chr21:37526548:37526622:-	DSCR3	ENSG00000157538	0.97	0.85	0.91	0.94	0.95	0.89	FALSE	FALSE	FALSE	FALSE	TRUE	CCTCCAACTCTCCCCTTTAGTAT	T
chr21:43397494:43397581:-@chr21:43394545:43394611:-@chr21:43393632:43393698:-	U2AF1	ENSG00000160201	0.33	0.21	0.3	0.18	0.22	0.28	FALSE	FALSE	FALSE	FALSE	TRUE	TTATTTTTTTTTCCCCGCAGACC	A
chr22:39594949:39595065:+@chr22:39595998:39596089:+@chr22:39607720:39608127:+	XPNPEP3	ENSG00000196236	0.23	0.09	0.15	0.04	0.14	0.19	FALSE	FALSE	FALSE	FALSE	TRUE	TTTTGCTGATTTTTCATCAGACT	A
chr22:43561001:43561150:+@chr22:43576621:43576708:+@chr22:43582851:43582982:+	PRR5	ENSG00000186654	0.86	0.97	0.89	0.92	0.93	0.95	FALSE	FALSE	FALSE	FALSE	FALSE	ACCTGTGTCTGCTCCTCCAGGGG	G
chr3:180575702:180575823:+@chr3:180577524:180577650:+@chr3:180577826:180577930:+	MFN1	ENSG00000171109	0.98	0.87	0.92	0.94	0.97	0.76	FALSE	FALSE	FALSE	FALSE	TRUE	TACTCTTTATACTGAAATAGGCA	G
chr3:57883656:57883790:+@chr3:57886612:57886701:+@chr3:57888063:57889934:+	SLMAP	ENSG00000163681	0.91	0.7	0.8	0.44	0.82	0.39	FALSE	FALSE	FALSE	FALSE	TRUE	ATATGCCTTCCCTTCTTTAGCCT	C
chr3:9450529:9450634:+@chr3:9450729:9450865:+@chr3:9450961:9451169:+	SETD5	ENSG00000168137	0.15	0.03	0.05	0.04	0.04	0.02	FALSE	FALSE	FALSE	FALSE	TRUE	CTTGAAATGTTTATATGCAGCAT	C
chr3:9705628:9705766:+@chr3:9714395:9714550:+@chr3:9718474:9719077:+	MTMR14	ENSG00000163719	0.62	0.46	0.5	0.38	0.45	0.54	FALSE	FALSE	FALSE	FALSE	TRUE	CTCTCTCCTCTCTGCCCCAGATC	A
chr4:141519725:141519796:+@chr4:141520173:141520256:+@chr4:141521566:141523160:+	SCOC	ENSG00000153130	0.87	0.57	0.63	0.49	0.72	0.37	FALSE	FALSE	FALSE	FALSE	TRUE	TTTGAACCTTTATATTACAGCAG	C
chr4:76635958:76636016:-@chr4:76635845:76635871:-@chr4:76634815:76634935:-	RCHY1	ENSG00000163743	0.86	0.7	0.75	0.43	0.53	0.56	FALSE	FALSE	FALSE	FALSE	TRUE	AATCTTATATTTTCTTTCAGAAC	A
chr5:122954912:122955007:+@chr5:122958632:122958727:+@chr5:122968317:122968423:+	CSNK1G3	ENSG00000151292	0.02	0.21	0.17	0.15	0.18	0.16	FALSE	FALSE	FALSE	FALSE	FALSE	ATGCATTAAATAAATGGCAGTCG	T
chr5:145597054:145597188:+@chr5:145611467:145611631:+@chr5:145614699:145614848:+	RBM27	ENSG00000091009	0.61	0.48	0.37	0.59	0.52	0.3	FALSE	FALSE	FALSE	FALSE	TRUE	TCCTATTCTTTCCTCTATAGGAC	G
chr5:59934975:59935151:-@chr5:59930659:59930844:-@chr5:59928496:59929498:-	DEPDC1B	ENSG00000035499	0.95	0.83	0.91	0.81	0.82	0.87	FALSE	FALSE	FALSE	FALSE	TRUE	TACTAATCCTTTTGCCTCAGATA	A
chr5:60222473:60222670:-@chr5:60221857:60221985:-@chr5:60219024:60219104:-	AC104113.3	ENSG00000215032	0.2	0.07	0.14	0.07	0.02	0.2	FALSE	FALSE	FALSE	FALSE	TRUE	TTTGTTTGTTTTACATCCAGATC	A
chr5:65384990:65386535:+@chr5:65406608:65406814:+@chr5:65407900:65407992:+	ERBB2IP	ENSG00000112851	0.81	0.67	0.73	0.43	0.55	0.81	FALSE	FALSE	FALSE	FALSE	TRUE	ATACTTCATGTTTTTCTTAGATG	A
chr5:74686084:74686278:+@chr5:74686637:74686795:+@chr5:74686946:74687103:+	HMGCR	ENSG00000113161	0.79	0.65	0.7	0.72	0.7	0.64	FALSE	FALSE	FALSE	FALSE	TRUE	TGCCTGACTTTACCTTTTAGGTG	G
chr5:74731786:74731878:-@chr5:74730891:74730968:-@chr5:74721173:74721268:-	COL4A3BP	ENSG00000113163	0.28	0.04	0.16	0.07	0.14	0.07	FALSE	FALSE	FALSE	FALSE	TRUE	TCTTTGTCTGTCTCTGGTAGCCC	C
chr6:109798307:109798363:-@chr6:109796818:109796913:-@chr6:109794410:109796221:-	CD164	ENSG00000135535	0.6	0.24	0.38	0.22	0.33	0.12	FALSE	FALSE	FALSE	FALSE	TRUE	TCTTTTGTCTTATCTAACAGGTA	G
chr6:161573058:161573324:-@chr6:161507270:161507439:-@chr6:161495171:161495332:-	AGPAT4	ENSG00000026652	0.87	0.75	0.85	0.7	0.71	0.89	FALSE	FALSE	FALSE	FALSE	TRUE	TCTGTTGTGGTTTGTTCCAGAGC	A
chr6:29799929:29800204:+@chr6:29800787:29801062:+@chr6:29801203:29801319:+	HLA-F	ENSG00000204642	0.74	0.97	0.93	0.91	0.97	0.97	FALSE	FALSE	FALSE	FALSE	FALSE	AATTTTCTGACTCTTCTCAGATC	A
chr6:30997345:30997447:+@chr6:30997681:30997751:+@chr6:30997872:30997997:+	VARSL	ENSG00000137411	0.97	0.84	0.91	0.74	0.85	0.87	FALSE	FALSE	FALSE	FALSE	TRUE	ATTCTTTTTCTGTTTCCCAGATC	A
chr6:32048058:32048267:+@chr6:32048377:32048513:+@chr6:32054659:32054754:+	STK19	ENSG00000204344	0.86	0.64	0.71	0.76	0.58	0.38	FALSE	FALSE	FALSE	FALSE	TRUE	GAGCCGATTTATCTGCCCAGGGT	G
chr6:34312628:34312718:+@chr6:34312959:34313072:+@chr6:34316492:34316637:+	HMGA1	ENSG00000137309	0.57	0.34	0.45	0.35	0.26	0.27	FALSE	FALSE	FALSE	FALSE	TRUE	CTGCTCTCTCCCGGTTTCAGATC	A
chr6:44332400:44332593:-@chr6:44332057:44332211:-@chr6:44329811:44331359:-	SLC35B2	ENSG00000157593	0.95	0.82	0.94	0.86	0.89	0.98	FALSE	FALSE	FALSE	FALSE	TRUE	ACTTTGTGTGCTTTCTTCAGGTA	G
chr6:56436322:56436521:-@chr6:56435803:56435913:-@chr6:56432888:56433011:-	DST	ENSG00000151914	0.99	0.69	0.78	0.42	0.69	0.84	FALSE	FALSE	FALSE	FALSE	TRUE	TTTGCCATTGTTCCATACAGATT	A
chr6:64403684:64404014:+@chr6:64447860:64448021:+@chr6:64451989:64453771:+	PHF3	ENSG00000118482	0.84	0.95	0.96	0.96	0.97	0.89	FALSE	FALSE	FALSE	FALSE	FALSE	TTTTTGTCGTTTTTTTCTAGTTG	T
chr6:86280943:86281066:-@chr6:86280507:86280671:-@chr6:86280237:86280332:-	SNX14	ENSG00000135317	0.98	0.82	0.86	0.97	0.92	0.79	FALSE	FALSE	FALSE	FALSE	TRUE	CCCATTTGATCCTTTCTCAGGAC	G
chr7:100241059:100241252:-@chr7:100240724:100240879:-@chr7:100238123:100239148:-	EPHB4	ENSG00000196411	0.99	0.87	0.96	0.98	0.97	0.89	FALSE	FALSE	FALSE	FALSE	TRUE	TCCCCATCCTTGCCCCCTAGGGC	G
chr7:100647705:100648218:+@chr7:100648320:100651797:+@chr7:100652605:100652775:+	AC004876.2-5	ENSG00000219716	0.11	0.26	0.32	0.4	0.44	0.46	FALSE	FALSE	FALSE	FALSE	FALSE	ggtctcgctctttcgcctaggct	g
chr7:100751672:100751750:-@chr7:100748957:100749033:-@chr7:100748125:100748214:-	RABL5	ENSG00000128581	0.96	0.79	0.92	0.7	0.82	0.86	FALSE	FALSE	FALSE	FALSE	TRUE	ATTTGCACTCATTTTCACAGAGT	A
chr7:102514313:102514447:+@chr7:102520160:102520336:+@chr7:102524960:102525031:+	ARMC10	ENSG00000170632	0.77	0.57	0.65	0.3	0.35	0.42	FALSE	FALSE	FALSE	FALSE	TRUE	TTTTCCTCCCCTGCCTTCAGATA	A
chr7:102514313:102514447:+@chr7:102520160:102520336:+@chr7:102525982:102527441:+	ARMC10	ENSG00000170632	0.91	0.44	0.64	0.28	0.3	0.42	FALSE	FALSE	FALSE	FALSE	TRUE	TTTTCCTCCCCTGCCTTCAGATA	A
chr7:142672207:142672307:+@chr7:142672476:142672511:+@chr7:142674832:142674948:+	GSTK1	ENSG00000197448	0.91	0.78	0.85	0.82	0.8	0.71	FALSE	FALSE	FALSE	FALSE	TRUE	CTGTCTTCTCTTCTTCCCAGAAT	A
chr7:150462420:150462588:+@chr7:150467999:150468136:+@chr7:150469918:150470072:+	AGAP3	ENSG00000133612	0.33	0.56	0.59	0.49	0.81	0.63	FALSE	FALSE	FALSE	FALSE	FALSE	tccaactctcccctcaccAGCCA	C
chr7:33068705:33068934:-@chr7:33042071:33042125:-@chr7:33032954:33033052:-	SRP_euk_arch	ENSG00000222782	0.83	0.97	0.93	0.97	0.99	0.98	FALSE	FALSE	FALSE	FALSE	FALSE	CATCACCTGGGAAAATCCAGAAG	A
chr7:73226642:73226708:+@chr7:73239877:73240064:+@chr7:73241939:73242003:+	WBSCR1	ENSG00000106682	0.97	0.84	0.94	0.94	0.96	0.92	FALSE	FALSE	FALSE	FALSE	TRUE	CTGTTTGTCTCCCCTCCTAGGTC	G
chr8:124222182:124222322:+@chr8:124223683:124223877:+@chr8:124226138:124226276:+	WDR67	ENSG00000156787	0.88	0.75	0.81	0.84	0.88	0.66	FALSE	FALSE	FALSE	FALSE	TRUE	AATGTATAACTTTTTCCTAGGTG	G
chr8:30730094:30730164:+@chr8:30731724:30731846:+@chr8:30733824:30733946:+	UBXN8	ENSG00000104691	0.95	0.81	0.92	0.87	0.9	0.91	FALSE	FALSE	FALSE	FALSE	TRUE	TAATTTGTTGTTTTCAACAGGCC	G
chr9:127143277:127143364:+@chr9:127144319:127144399:+@chr9:127148919:127149041:+	GAPVD1	ENSG00000165219	0.8	0.68	0.77	0.48	0.82	0.62	FALSE	FALSE	FALSE	FALSE	TRUE	TGACTTTATTTAATTTCCAGCTC	C
chr9:129535485:129535660:-@chr9:129534664:129534791:-@chr9:129533624:129534378:-	TOR2A	ENSG00000160404	0.47	0.29	0.38	0.26	0.28	0.22	FALSE	FALSE	FALSE	FALSE	TRUE	TGGGTCCCCCATGGTTTTAGCAA	C
chr9:130886768:130886868:+@chr9:130887123:130887207:+@chr9:130887307:130887406:+	DOLPP1	ENSG00000167130	0.92	0.76	0.84	0.54	0.77	0.84	FALSE	FALSE	FALSE	FALSE	TRUE	CCATGCGTCTTCCCCAGCAGATC	A
chrX:130985217:130985368:+@chrX:131016340:131016570:+@chrX:131025142:131025198:+	RP6-213H19.1	ENSG00000134602	0.87	0.98	0.98	0.88	0.93	0.98	FALSE	FALSE	FALSE	FALSE	FALSE	TCGTTCCCCACTCCCTTCAGAAT	A
chrX:146826677:146826811:+@chrX:146827310:146827372:+@chrX:146829787:146829873:+	FMR1	ENSG00000102081	0.5	0.31	0.31	0.35	0.36	0.28	FALSE	FALSE	FALSE	FALSE	TRUE	CATTCCTTATACTGCTTTAGGTG	G
chr1:110683468:110686413:+@chr1:110689684:110689794:+@chr1:110690453:110690826:+	RBM15	ENSG00000162775	0.37	0.24	0.34	0.31	0.41	0.29	FALSE	FALSE	TRUE	FALSE	TRUE	TTTTTCTGTCTCTCTCACAGGGT	G
chr1:113051223:113051548:-@chr1:113049245:113049313:-@chr1:113047789:113047951:-	RHOC	ENSG00000155366	0.55	0.37	0.54	0.3	0.73	0.29	FALSE	FALSE	TRUE	FALSE	TRUE	CCCCTCCCCCTTCCCAACAGCCT	C
chr1:184618777:184618911:+@chr1:184621743:184621838:+@chr1:184624197:184624303:+	C1orf27	ENSG00000157181	0.86	0.74	0.8	0.69	0.93	0.82	FALSE	FALSE	TRUE	FALSE	TRUE	TAATATATTTCTATTTTTAGGTA	G
chr10:120091772:120091808:-@chr10:120091229:120091429:-@chr10:120085684:120085925:-	C10orf84	ENSG00000165669	0.5	0.27	0.33	0.19	0.61	0.29	FALSE	FALSE	TRUE	FALSE	TRUE	TGCTGTATTCCGGAAAACAGCTC	C
chr10:14960872:14960924:+@chr10:14963505:14963650:+@chr10:14978851:14979522:+	SUV39H2	ENSG00000152455	0.62	0.32	0.3	0.14	0.57	0.23	FALSE	FALSE	TRUE	FALSE	TRUE	ATTCTATTTTCTTATTGTAGCTT	C
chr11:71819004:71819055:-@chr11:71791658:71791744:-@chr11:71768973:71769076:-	CLPB	ENSG00000162129	0.98	0.84	0.93	0.96	0.96	0.84	FALSE	FALSE	TRUE	FALSE	TRUE	ATTCCTCTGTCTTGTTTTAGGCT	G
chr11:85017265:85017380:+@chr11:85017824:85017895:+@chr11:85020379:85020500:+	TMEM126B	ENSG00000171204	0.16	0.01	0.07	0.01	0.09	0.01	FALSE	FALSE	TRUE	FALSE	TRUE	ttctgtgtttaaattgccagctt	c
chr11:85017265:85017380:+@chr11:85017824:85017954:+@chr11:85020379:85020500:+	TMEM126B	ENSG00000171204	0.27	0.04	0.15	0.06	0.22	0.05	FALSE	FALSE	TRUE	FALSE	TRUE	ttctgtgtttaaattgccagctt	c
chr12:110407900:110408052:-@chr12:110407452:110407518:-@chr12:110392745:110392929:-	ATXN2	ENSG00000204842	0.97	0.85	0.95	0.67	0.97	0.56	FALSE	FALSE	TRUE	FALSE	TRUE	TTTTTTTTAATTCTCTCAAGCCT	C
chr12:110407900:110408052:-@chr12:110407458:110407518:-@chr12:110392745:110392929:-	ATXN2	ENSG00000204842	0.97	0.86	0.94	0.68	0.98	0.59	FALSE	FALSE	TRUE	FALSE	TRUE	TTTTTTTTAATTCTCTCAAGCCT	C
chr12:120811029:120811283:+@chr12:120817028:120817130:+@chr12:120825295:120825396:+	PSMD9	ENSG00000110801	0.93	0.74	0.84	0.8	0.85	0.84	FALSE	FALSE	TRUE	FALSE	TRUE	ACCACGTTTCTTTCCTCCAGCAA	C
chr12:61005920:61005981:+@chr12:61029269:61029355:+@chr12:61035379:61035523:+	USP15	ENSG00000135655	0.48	0.37	0.53	0.55	0.61	0.42	FALSE	FALSE	TRUE	FALSE	TRUE	acattttcatatttttaaaGGTC	G
chr13:49163391:49163612:-@chr13:49141914:49141983:-@chr13:49132863:49133345:-	AL135901.23-2	ENSG00000203548	0.2	0.31	0.21	0.22	0.12	0.2	FALSE	FALSE	TRUE	FALSE	FALSE	CTTCATTTTCTCCTCTCTAGGAA	G
chr15:38788515:38788606:+@chr15:38798295:38798389:+@chr15:38808201:38808314:+	RAD51	ENSG00000051180	0.84	0.72	0.82	0.53	0.85	0.58	FALSE	FALSE	TRUE	FALSE	TRUE	GTTGTTTTTGTTCTCTATAGCTT	C
chr15:78138965:78139206:+@chr15:78177813:78177975:+@chr15:78199725:78199895:+	ZFAND6	ENSG00000086666	0.37	0.57	0.47	0.58	0.41	0.56	FALSE	FALSE	TRUE	FALSE	FALSE	TCATGTTAAATGTGTTACAGGAA	G
chr17:23686493:23686642:-@chr17:23683299:23683535:-@chr17:23683012:23683140:-	IFT20	ENSG00000109083	0.5	0.32	0.41	0.18	0.6	0.24	FALSE	FALSE	TRUE	FALSE	TRUE	ccgtgtctgtcttcttccagctg	c
chr17:71176191:71176300:+@chr17:71179491:71179538:+@chr17:71201115:71201157:+	SAP30BP	ENSG00000161526	0.94	0.8	0.88	0.91	0.94	0.83	FALSE	FALSE	TRUE	FALSE	TRUE	CTAAATTCTTTGTCTTGTAGGAA	G
chr19:50609959:50610058:-@chr19:50609061:50609132:-@chr19:50608775:50608843:-	ERCC1	ENSG00000012061	0.84	0.66	0.77	0.79	0.83	0.73	FALSE	FALSE	TRUE	FALSE	TRUE	CCTGCCTCCACCCTTTCCAGGTG	G
chr2:27111507:27111657:+@chr2:27111966:27112100:+@chr2:27112342:27112424:+	TMEM214	ENSG00000119777	0.89	0.74	0.87	0.59	0.88	0.69	FALSE	FALSE	TRUE	FALSE	TRUE	TTGAGGCCTATGGGCCTTAGATT	A
chr2:74612491:74612560:+@chr2:74613254:74613349:+@chr2:74613455:74614191:+	HTRA2	ENSG00000115317	0.93	0.76	0.83	0.57	0.91	0.44	FALSE	FALSE	TRUE	FALSE	TRUE	GGTGATCTGTGTACTTTCAGCAT	C
chr21:29176353:29176443:-@chr21:29174063:29174146:-@chr21:29172385:29172526:-	HEMK2	ENSG00000156239	0.71	0.56	0.6	0.68	0.75	0.57	FALSE	FALSE	TRUE	FALSE	TRUE	CTGTTGTTGAATACATTTAGGTC	G
chr3:185515050:185515156:+@chr3:185515971:185516027:+@chr3:185516245:185516338:+	EIF4G1	ENSG00000114867	0.92	0.81	0.9	0.93	0.94	0.89	FALSE	FALSE	TRUE	FALSE	TRUE	CCCTCACCTCCCAACCCCAGGCC	G
chr3:38143005:38143195:-@chr3:38142657:38142836:-@chr3:38142321:38142376:-	ACAA1	ENSG00000060971	0.79	0.68	0.8	0.77	0.83	0.78	FALSE	FALSE	TRUE	FALSE	TRUE	CCCCAACAGTTTGCCCCTAGGAA	G
chr4:141519725:141519796:+@chr4:141520176:141520256:+@chr4:141521566:141523160:+	SCOC	ENSG00000153130	0.65	0.29	0.38	0.26	0.51	0.21	FALSE	FALSE	TRUE	FALSE	TRUE	GAACCTTTATATTACAGCAGTTG	T
chr4:1777576:1777698:+@chr4:1777782:1777852:+@chr4:1778071:1778208:+	FGFR3	ENSG00000068078	0.87	0.74	0.9	0.89	0.94	0.85	FALSE	FALSE	TRUE	FALSE	TRUE	GCCTTCCCACACCCTCCCAGGGC	G
chr4:74226322:74226424:-@chr4:74224112:74224864:-@chr4:74219698:74219846:-	ANKRD17	ENSG00000132466	0.49	0.32	0.38	0.24	0.45	0.29	FALSE	FALSE	TRUE	FALSE	TRUE	GGGGTTTCTTTTTCACACAGCTG	C
chr6:110607335:110607900:-@chr6:110606494:110606638:-@chr6:110555365:110555525:-	WASF1	ENSG00000112290	0.52	0.29	0.45	0.35	0.51	0.24	FALSE	FALSE	TRUE	FALSE	TRUE	TTCTTTTCCCCTTGCTACAGCAT	C
chr6:116999276:116999511:+@chr6:117001914:117002027:+@chr6:117008151:117008216:+	RWDD1	ENSG00000111832	0.57	0.21	0.36	0.18	0.52	0.16	FALSE	FALSE	TRUE	FALSE	TRUE	TCTTTTTGCCTATTCTGTAGCTT	C
chr7:106998826:106998947:+@chr7:107001385:107001502:+@chr7:107002869:107002991:+	DUS4L	ENSG00000105865	0.89	0.71	0.82	0.81	0.89	0.83	FALSE	FALSE	TRUE	FALSE	TRUE	TGAGCTATTCATTTTGTCAGGTG	G
chr9:114496232:114496334:-@chr9:114491628:114491718:-@chr9:114488612:114489734:-	C9orf80	ENSG00000148153	0.89	0.62	0.73	0.45	0.85	0.55	FALSE	FALSE	TRUE	FALSE	TRUE	AACCAAGATTCCCATTTTAGCAT	C
chr9:80070108:80070279:+@chr9:80070595:80070642:+@chr9:80071178:80071803:+	CEP78	ENSG00000148019	0.34	0.19	0.29	0.3	0.47	0.33	FALSE	FALSE	TRUE	FALSE	TRUE	TCTATTCATATTCCATCTAGGTT	G
chrX:54038851:54038940:-@chrX:54036759:54037061:-@chrX:54035894:54035997:-	PHF8	ENSG00000172943	0.88	0.77	0.81	0.84	0.9	0.68	FALSE	FALSE	TRUE	FALSE	TRUE	ATGTACTAACACTCTTGTAGGAC	G
chr1:149681181:149681305:-@chr1:149680028:149680186:-@chr1:149669766:149669941:-	POGZ	ENSG00000143442	0.87	0.66	0.77	0.9	0.76	0.76	FALSE	TRUE	FALSE	FALSE	TRUE	ATGCCTCCCCTTCCCCACAGTTT	T
chr1:154530433:154530651:-@chr1:154529735:154529844:-@chr1:154529102:154529624:-	C1orf85	ENSG00000198715	0.68	0.45	0.61	0.69	0.57	0.57	FALSE	TRUE	FALSE	FALSE	TRUE	TAGCATACTCTCTTCCCCAGTCA	T
chr1:154531941:154532073:-@chr1:154531174:154531431:-@chr1:154530780:154530980:-	C1orf85	ENSG00000198715	0.67	0.49	0.6	0.71	0.6	0.43	FALSE	TRUE	FALSE	FALSE	TRUE	TCCACTACTCCATGTTCCAGGTG	G
chr1:181089788:181089936:+@chr1:181091335:181091471:+@chr1:181092290:181092336:+	DHX9	ENSG00000135829	0.64	0.53	0.58	0.73	0.59	0.4	FALSE	TRUE	FALSE	FALSE	TRUE	GGTGTCGCTGTTCCCCCTAGGTG	G
chr1:27611653:27611808:-@chr1:27608773:27609287:-@chr1:27603321:27607427:-	WASF2	ENSG00000158195	0.89	0.69	0.81	0.87	0.71	0.65	FALSE	TRUE	FALSE	FALSE	TRUE	TTTTTTCTTTGGCCTTTTAGTTA	T
chr1:53266229:53266331:+@chr1:53277177:53277306:+@chr1:53286118:53286197:+	SCP2	ENSG00000116171	0.94	0.83	0.86	0.96	0.91	0.85	FALSE	TRUE	FALSE	FALSE	TRUE	AGTGTTATTTTTCTTTCCAGGAA	G
chr1_random:876185:876262:+@chr1_random:880204:880328:+@chr1_random:888699:889888:+	N/A	N/A	0.97	0.81	0.86	0.91	0.85	0.79	FALSE	TRUE	FALSE	FALSE	TRUE	ACATTTACTTTCTTTTCTAGTGG	T
chr12:51995145:51995191:-@chr12:51994802:51994900:-@chr12:51994349:51994492:-	AAAS	ENSG00000094914	0.9	0.7	0.82	0.92	0.76	0.73	FALSE	TRUE	FALSE	FALSE	TRUE	CATGTTAACCCCTTCCTTAGGTC	G
chr13:48731483:48731660:+@chr13:48738016:48738140:+@chr13:48739627:48740196:+	CDADC1	ENSG00000102543	0.42	0.15	0.21	0.38	0.27	0.09	FALSE	TRUE	FALSE	FALSE	TRUE	TTTTTCCCCTCTTGAATCAGGAT	G
chr14:88114082:88114237:+@chr14:88132831:88132905:+@chr14:88143340:88143460:+	ZC3H14	ENSG00000100722	0.68	0.5	0.54	0.69	0.63	0.48	FALSE	TRUE	FALSE	FALSE	TRUE	TTTTAAAATTTATATTCTAGGAA	G
chr15:20584719:20584854:-@chr15:20579242:20579363:-@chr15:20572639:20572870:-	NIPA2	ENSG00000140157	0.59	0.37	0.43	0.66	0.44	0.39	FALSE	TRUE	FALSE	FALSE	TRUE	AAAAAATATCTCTGTTGCAGGCT	G
chr16:65149594:65149752:+@chr16:65154526:65154621:+@chr16:65157290:65157691:+	CKLF	ENSG00000217555	0.94	0.83	0.89	0.92	0.89	0.65	FALSE	TRUE	FALSE	FALSE	TRUE	GCTTTATTGTGTGTTTTTAGGAT	G
chr17:45237724:45237806:+@chr17:45241480:45241569:+@chr17:45243837:45243935:+	MYST2	ENSG00000136504	0.82	0.68	0.78	0.83	0.81	0.57	FALSE	TRUE	FALSE	FALSE	TRUE	GACGTTGTTGATGGTTGCAGGTG	G
chr17:5266813:5266873:+@chr17:5272115:5272255:+@chr17:5276586:5276920:+	AC004148.1	ENSG00000215099	0.67	0.47	0.54	0.73	0.54	0.44	FALSE	TRUE	FALSE	FALSE	TRUE	TGAACTTTTTTATTTTGTAGTCT	T
chr18:21872517:21872621:-@chr18:21869793:21869885:-@chr18:21868967:21869089:-	SS18	ENSG00000141380	0.38	0.27	0.33	0.52	0.3	0.38	FALSE	TRUE	FALSE	FALSE	TRUE	CTCTTGTCGAATTGATGTAGGTC	G
chr19:46631282:46631418:-@chr19:46631017:46631179:-@chr19:46629063:46630153:-	ATP5SL	ENSG00000105341	0.28	0.08	0.17	0.21	0.11	0.1	FALSE	TRUE	FALSE	FALSE	TRUE	CCACCCTCTCCCCACCGCAGTCC	T
chr19:756013:756187:+@chr19:756513:756569:+@chr19:757408:757556:+	PTBP1	ENSG00000011304	0.16	0.04	0.08	0.17	0.09	0.03	FALSE	TRUE	FALSE	FALSE	TRUE	TGCACCTGGTATAATCTCAGCCT	C
chr2:113911853:113912069:+@chr2:113913067:113913164:+@chr2:113915398:113915484:+	CBWD2	ENSG00000136682	0.19	0.05	0.09	0.21	0.12	0.11	FALSE	TRUE	FALSE	FALSE	TRUE	TTTTTGGCGTTTCCCCACAGTTA	T
chr2:217008306:217008464:+@chr2:217011388:217011453:+@chr2:217019986:217020126:+	SMARCAL1	ENSG00000138375	0.93	0.76	0.89	0.91	0.84	0.81	FALSE	TRUE	FALSE	FALSE	TRUE	ATGTGGCTACTTCTTTTCAGGAT	G
chr2:241685331:241685515:-@chr2:241683218:241684526:-@chr2:241682365:241682520:-	MTERFD2	ENSG00000122085	0.51	0.34	0.38	0.51	0.3	0.41	FALSE	TRUE	FALSE	FALSE	TRUE	AGTGTGTTTGTGTCTTCCAGTAT	T
chr2:27302077:27302298:+@chr2:27302503:27302691:+@chr2:27302897:27303021:+	CAD	ENSG00000084774	0.97	0.86	0.9	0.98	0.94	0.95	FALSE	TRUE	FALSE	FALSE	TRUE	CATGGCACCCCCCTTCACAGGTG	G
chr2_random:102980:103088:-@chr2_random:97440:97530:-@chr2_random:95663:95860:-	N/A	N/A	0.83	0.72	0.71	0.86	0.79	0.61	FALSE	TRUE	FALSE	FALSE	TRUE	AGGAGCATCCTCTTTTTCAGGCC	G
chr20:17898444:17899013:+@chr20:17916809:17916941:+@chr20:17918582:17919762:+	C20orf72	ENSG00000125871	0.93	0.8	0.85	0.9	0.86	0.83	FALSE	TRUE	FALSE	FALSE	TRUE	TTCCTGTGGTTTCTCTTTAGGGG	G
chr4:84047962:84048112:+@chr4:84050874:84050988:+@chr4:84057121:84060146:+	THAP9	ENSG00000168152	0.29	0.17	0.26	0.51	0.24	0.16	FALSE	TRUE	FALSE	FALSE	TRUE	aataaatatttattgatcaggag	g
chr6:106870669:106870834:-@chr6:106862932:106863059:-@chr6:106847596:106847674:-	ATG5	ENSG00000057663	0.63	0.52	0.54	0.65	0.63	0.54	FALSE	TRUE	FALSE	FALSE	TRUE	TTTACAAATTTTCATTTCAGTTG	T
chr7:100748957:100749033:-@chr7:100748125:100748214:-@chr7:100746341:100746543:-	RABL5	ENSG00000128581	0.89	0.76	0.8	0.9	0.84	0.8	FALSE	TRUE	FALSE	FALSE	TRUE	GCTCTTCTTTTTCCTTTTAGGAT	G
chr7:72058321:72058436:-@chr7:72057780:72057966:-@chr7:72057367:72057577:-	NSUN5C	ENSG00000106133	0.96	0.82	0.93	0.96	0.92	0.89	FALSE	TRUE	FALSE	FALSE	TRUE	TGCTCTGCCCTCTGCCCTAGGAA	G
chr7:72058321:72058436:-@chr7:72057788:72057966:-@chr7:72057367:72057577:-	NSUN5C	ENSG00000106133	0.95	0.82	0.92	0.97	0.92	0.88	FALSE	TRUE	FALSE	FALSE	TRUE	TGCTCTGCCCTCTGCCCTAGGAA	G
chr7:74829178:74829294:+@chr7:74831838:74831961:+@chr7:74832460:74832558:+	STAG3L2	ENSG00000174353	0.55	0.33	0.37	0.58	0.47	0.5	FALSE	TRUE	FALSE	FALSE	TRUE	ACTTATCTGTCTGTGTCTAGGGA	G
chr8:75047034:75047076:-@chr8:75034554:75034607:-@chr8:75030700:75030843:-	TCEB1	ENSG00000154582	0.42	0.26	0.28	0.39	0.38	0.23	FALSE	TRUE	FALSE	FALSE	TRUE	TGATATTGTTATATTTTCAGGAA	G
chr8:86319787:86319895:-@chr8:86318804:86318844:-@chr8:86316867:86316983:-	AC011773.9	ENSG00000176731	0.08	0.21	0.17	0.14	0.19	0.21	FALSE	TRUE	FALSE	FALSE	FALSE	CTACTGCATTCTTTTTTAAGTAG	T
chr8:95954778:95954881:+@chr8:95955956:95956006:+@chr8:95957478:95957551:+	INTS8	ENSG00000164941	0.95	0.68	0.82	0.85	0.8	0.57	FALSE	TRUE	FALSE	FALSE	TRUE	TGAGAATTTTGCTTTTGTAGGTA	G
chr9:124948955:124949154:-@chr9:124941629:124941787:-@chr9:124938481:124938615:-	STRBP	ENSG00000165209	0.9	0.77	0.83	0.9	0.84	0.81	FALSE	TRUE	FALSE	FALSE	TRUE	TTTTAATGTAATTTGTACAGGTA	G
chr9:34169003:34169238:+@chr9:34210906:34210946:+@chr9:34224214:34224338:+	AL353662.19-2	ENSG00000203512	0.77	0.97	0.96	0.79	0.95	0.9	FALSE	TRUE	FALSE	FALSE	FALSE	AATATTTCCTTGTTTTTCAGGTT	G
chrX:131030121:131030278:+@chrX:131031187:131031372:+@chrX:131032778:131032926:+	RP6-213H19.1	ENSG00000134602	0.91	0.74	0.8	0.89	0.85	0.85	FALSE	TRUE	FALSE	FALSE	TRUE	TCTTTTTCCTTTTACGTTAGGCT	G
chrX:46913658:46913841:+@chrX:46915371:46915601:+@chrX:46917471:46917540:+	RBM10	ENSG00000182872	0.37	0.24	0.2	0.37	0.24	0.14	FALSE	TRUE	FALSE	FALSE	TRUE	CATCTCATTCTGTCGGCCAGGAT	G
chrX:46917471:46917540:+@chrX:46919362:46919435:+@chrX:46920843:46920929:+	RBM10	ENSG00000182872	0.74	0.59	0.67	0.89	0.72	0.75	FALSE	TRUE	FALSE	FALSE	TRUE	TATCTGAATGCTGTCTCCAGGTC	G
chr1:101259785:101259909:-@chr1:101251854:101251962:-@chr1:101239611:101239688:-	DPH5	ENSG00000117543	0.87	0.75	0.79	0.93	0.91	0.75	FALSE	TRUE	TRUE	FALSE	TRUE	CTAATCTTTTCTCACTACAGGGC	G
chr1:111307766:111308089:-@chr1:111295433:111296960:-@chr1:111293996:111294268:-	C1orf103	ENSG00000121931	0.39	0.25	0.28	0.4	0.4	0.17	FALSE	TRUE	TRUE	FALSE	TRUE	TTACTCAATGTTCTTTTAAGTGT	T
chr1:149065643:149065717:-@chr1:149062294:149062445:-@chr1:149057020:149057130:-	ARNT	ENSG00000143437	0.96	0.78	0.91	0.95	0.93	0.84	FALSE	TRUE	TRUE	FALSE	TRUE	TGGCATGAAAACTTTTTCAGGTA	G
chr1:231158716:231158812:+@chr1:231172278:231172487:+@chr1:231180532:231180842:+	C1orf57	ENSG00000135778	0.91	0.8	0.82	0.89	0.92	0.8	FALSE	TRUE	TRUE	FALSE	TRUE	AAAGTCTTTGTCATTCTCAGGCC	G
chr1:28234642:28234778:-@chr1:28226887:28227024:-@chr1:28216252:28216337:-	AL512288.19-1	ENSG00000209759	0.35	0.22	0.28	0.52	0.33	0.25	FALSE	TRUE	TRUE	FALSE	TRUE	GTCCAATTTATCTGATTCAGGTG	G
chr1:29252203:29252411:+@chr1:29259521:29259583:+@chr1:29264081:29264257:+	EPB41	ENSG00000159023	0.59	0.75	0.7	0.38	0.38	0.82	FALSE	TRUE	TRUE	FALSE	FALSE	CCCCCCTTTCATTTTCACAGAAA	A
chr1:9723739:9723901:-@chr1:9720143:9720199:-@chr1:9718530:9718687:-	CLSTN1	ENSG00000171603	0.37	0.65	0.54	0.48	0.48	0.56	FALSE	TRUE	TRUE	FALSE	FALSE	TTTGTCTTGCTTTTCCACAGAGT	A
chr10:27094153:27094253:-@chr10:27084590:27084676:-@chr10:27080533:27080718:-	SSH3BP	ENSG00000136754	0.78	0.89	0.82	0.52	0.71	0.77	FALSE	TRUE	TRUE	FALSE	FALSE	TACTGTGTTGTTGCTACCAGTTT	T
chr10:74966033:74966201:-@chr10:74964364:74964534:-@chr10:74960468:74960599:-	USP54	ENSG00000166348	0.24	0.1	0.17	0.34	0.2	0.04	FALSE	TRUE	TRUE	FALSE	TRUE	GTGTTTCCTCCTCCTCTCAGGGA	G
chr11:125648441:125648559:+@chr11:125650032:125650126:+@chr11:125650432:125650533:+	FOXRED1	ENSG00000110074	0.82	0.63	0.76	0.83	0.84	0.55	FALSE	TRUE	TRUE	FALSE	TRUE	GACCCACACGTTTATCTCAGGCA	G
chr11:62158869:62159048:-@chr11:62158358:62158423:-@chr11:62157493:62157562:-	GANAB	ENSG00000089597	0.21	0.44	0.33	0.3	0.27	0.47	FALSE	TRUE	TRUE	FALSE	FALSE	CCCATCTCCTCCTGCCCCAGTTT	T
chr12:46776393:46776477:-@chr12:46769213:46769343:-@chr12:46768851:46769010:-	SENP1	ENSG00000079387	0.15	0.01	0.07	0.45	0.16	0.01	FALSE	TRUE	TRUE	FALSE	TRUE	TCTGGCCTACCTTCTTTCAGGCC	G
chr12:52147272:52147344:+@chr12:52147856:52147894:+@chr12:52148828:52148883:+	PCBP2	ENSG00000197111	0.66	0.22	0.44	0.49	0.56	0.32	FALSE	TRUE	TRUE	FALSE	TRUE	TTTCACTTGTATCTTAACAGGCA	G
chr12:52184749:52184866:+@chr12:52185186:52185313:+@chr12:52185700:52185901:+	TARBP2	ENSG00000139546	0.77	0.54	0.62	0.72	0.66	0.59	FALSE	TRUE	TRUE	FALSE	TRUE	AGCCCTCTCTCCACATGCAGGGA	G
chr12:78725137:78725241:-@chr12:78724077:78724244:-@chr12:78723503:78723679:-	PPP1R12A	ENSG00000058272	0.55	0.29	0.38	0.45	0.57	0.39	FALSE	TRUE	TRUE	FALSE	TRUE	GATATGACTCTTTTGTTTAGTTG	T
chr13:47473317:47473463:-@chr13:47468979:47469159:-@chr13:47461018:47461117:-	SUCLA2	ENSG00000136143	0.94	0.83	0.88	0.97	0.93	0.88	FALSE	TRUE	TRUE	FALSE	TRUE	TATGTCCCCAATCTTTCTAGGTT	G
chr14:101768625:101768798:-@chr14:101767797:101767911:-@chr14:101765547:101765747:-	RAGE	ENSG00000080823	0.42	0.3	0.32	0.54	0.56	0.31	FALSE	TRUE	TRUE	FALSE	TRUE	TCTCTTCTCCTTCCCCGTAGGAA	G
chr14:103027867:103028124:+@chr14:103034592:103034618:+@chr14:103038972:103039919:+	MARK3	ENSG00000075413	0.1	0.21	0.24	0.09	0.08	0.28	FALSE	TRUE	TRUE	FALSE	FALSE	ttttacttaatttCTTTTAGAAA	A
chr14:49138838:49138936:+@chr14:49143868:49144589:+@chr14:49150724:49151140:+	PPIL5	ENSG00000165501	0.37	0.24	0.25	0.39	0.39	0.19	FALSE	TRUE	TRUE	FALSE	TRUE	TACAACTTTTATTTATTCAGGCC	G
chr14:49140020:49140086:+@chr14:49143868:49144589:+@chr14:49150724:49151140:+	PPIL5	ENSG00000165501	0.38	0.24	0.25	0.41	0.42	0.2	FALSE	TRUE	TRUE	FALSE	TRUE	TACAACTTTTATTTATTCAGGCC	G
chr14:89840032:89840479:-@chr14:89838817:89839222:-@chr14:89837336:89837469:-	C14orf102	ENSG00000119720	0.85	0.57	0.7	0.93	0.87	0.73	FALSE	TRUE	TRUE	FALSE	TRUE	TTGGTGTTTTTGTTGTTGAGGAC	G
chr15:83060260:83060678:-@chr15:83058966:83059101:-@chr15:83035770:83035879:-	SEC11A	ENSG00000140612	0.18	0.04	0.08	0.24	0.13	0.05	FALSE	TRUE	TRUE	FALSE	TRUE	TTTATTGTACTCTATGCTAGGTA	G
chr15:88034812:88035019:-@chr15:88030666:88030781:-@chr15:88025766:88028183:-	PEX11A	ENSG00000166821	0.84	0.95	0.91	0.61	0.8	0.98	FALSE	TRUE	TRUE	FALSE	FALSE	TTTTTTTTTTTCCATTTCAGAGC	A
chr17:43488747:43488959:+@chr17:43489393:43489482:+@chr17:43489705:43489863:+	NFE2L1	ENSG00000082641	0.25	0.08	0.16	0.33	0.35	0.12	FALSE	TRUE	TRUE	FALSE	TRUE	TACAGTTCCTGTTGCCACAGGTG	G
chr17:63757924:63758206:+@chr17:63758530:63758703:+@chr17:63758786:63758914:+	AMZ2	ENSG00000196704	0.99	0.78	0.86	0.9	0.89	0.85	FALSE	TRUE	TRUE	FALSE	TRUE	AATGTTCTTCCATATTGTAGGCT	G
chr17:6494400:6494477:-@chr17:6494026:6494122:-@chr17:6487357:6488703:-	MED31	ENSG00000108590	0.77	0.6	0.62	0.82	0.77	0.66	FALSE	TRUE	TRUE	FALSE	TRUE	TTTTTTTTAATGCTTTTCAGTTC	T
chr17:70725875:70725996:+@chr17:70732793:70732927:+@chr17:70733032:70733154:+	NUP85	ENSG00000125450	0.9	0.77	0.86	0.94	0.9	0.85	FALSE	TRUE	TRUE	FALSE	TRUE	GGGCCCGGATCTCCTCCCAGGTG	G
chr17:70754185:70754260:-@chr17:70752295:70752393:-@chr17:70751123:70751246:-	GGA3	ENSG00000125447	0.73	0.59	0.69	0.77	0.77	0.61	FALSE	TRUE	TRUE	FALSE	TRUE	TCTCCTCTGTGCGGCTACAGGTG	G
chr17:7421869:7421958:+@chr17:7422269:7422286:+@chr17:7422384:7423048:+	SNORA67	ENSG00000207152	0.81	0.48	0.57	0.69	0.69	0.54	FALSE	TRUE	TRUE	FALSE	TRUE	TATGACCTTCCCACCAACAGGGA	G
chr19:62749637:62751173:-@chr19:62746831:62747763:-@chr19:62745020:62746423:-	ZNF550	ENSG00000105132	0.56	0.37	0.47	0.68	0.68	0.37	FALSE	TRUE	TRUE	FALSE	TRUE	CTCTGTTTTTGTTTTTTCAGGAC	G
chr2:219155938:219156053:+@chr2:219157579:219157688:+@chr2:219160553:219160662:+	RQCD1	ENSG00000144580	0.96	0.79	0.88	0.95	0.94	0.71	FALSE	TRUE	TRUE	FALSE	TRUE	TAATTATTGTTTTCTTCCAGGTC	G
chr2:39841975:39842062:-@chr2:39837892:39838012:-@chr2:39836533:39836604:-	THUMPD2	ENSG00000138050	0.67	0.51	0.59	0.76	0.72	0.49	FALSE	TRUE	TRUE	FALSE	TRUE	attttgtttctttcCATTAGGTa	G
chr2:53882354:53882483:+@chr2:53888940:53889101:+@chr2:53889855:53889914:+	C2orf30	ENSG00000068912	0.79	0.69	0.69	0.9	0.87	0.83	FALSE	TRUE	TRUE	FALSE	TRUE	ACGTGTGTGTTTAATTTTAGGAA	G
chr20:47224139:47224213:-@chr20:47215941:47216229:-@chr20:47203877:47204015:-	STAU1	ENSG00000124214	0.17	0.06	0.12	0.19	0.15	0.08	FALSE	TRUE	TRUE	FALSE	TRUE	CTTTCCCTTACAACTTTTAGGTA	G
chr22:18768300:18768425:-@chr22:18767159:18767279:-@chr22:18766517:18766675:-	PI4KAP1	ENSG00000215513	0.6	0.38	0.47	0.89	0.78	0.27	FALSE	TRUE	TRUE	FALSE	TRUE	CCAGGGCGCTCTCTGCACAGGCC	G
chr22:41328720:41329110:-@chr22:41327920:41328006:-@chr22:41325648:41325743:-	POLDIP3	ENSG00000100227	0.87	0.71	0.74	0.84	0.83	0.62	FALSE	TRUE	TRUE	FALSE	TRUE	TGACCACTGAGTGTTTCCAGGTT	G
chr22:41867112:41867199:-@chr22:41863031:41863248:-@chr22:41858156:41859436:-	MCAT	ENSG00000100294	0.89	0.75	0.81	0.85	0.87	0.76	FALSE	TRUE	TRUE	FALSE	TRUE	ATGCGCTTCTCTCTGGCCAGGTT	G
chr3:114192490:114192872:+@chr3:114194563:114194661:+@chr3:114196672:114196802:+	GTPBP8	ENSG00000163607	0.86	0.72	0.82	0.86	0.87	0.73	FALSE	TRUE	TRUE	FALSE	TRUE	CTTGTTTTTTCTTGTATAAGGTG	G
chr3:11855696:11855788:-@chr3:11849477:11849625:-@chr3:11846188:11846338:-	C3orf31	ENSG00000144559	0.27	0.1	0.19	0.24	0.21	0.07	FALSE	TRUE	TRUE	FALSE	TRUE	GCACTTTCTTTTTTTCCCAGGCC	G
chr3:187985047:187985179:+@chr3:187985445:187985584:+@chr3:187986366:187986534:+	EIF4A2	ENSG00000156976	0.59	0.37	0.42	0.58	0.54	0.38	FALSE	TRUE	TRUE	FALSE	TRUE	GTGTATCCTACTTTTTTTAGGGT	G
chr3:25745628:25745813:-@chr3:25736509:25736686:-@chr3:25735439:25736130:-	NGLY1	ENSG00000151092	0.81	0.54	0.62	0.75	0.78	0.45	FALSE	TRUE	TRUE	FALSE	TRUE	CCCATCCCTACTCCTTATAGGTA	G
chr3:32458336:32458509:+@chr3:32465950:32466048:+@chr3:32468888:32468969:+	CMTM7	ENSG00000153551	0.81	0.68	0.77	0.88	0.83	0.68	FALSE	TRUE	TRUE	FALSE	TRUE	TGCTTTGTTTCTGCCCCCAGGAA	G
chr3:37371596:37371682:+@chr3:37377738:37377800:+@chr3:37382575:37383246:+	GOLGA4	ENSG00000144674	0.72	0.24	0.42	0.49	0.55	0.28	FALSE	TRUE	TRUE	FALSE	TRUE	TTTTCTTCCTGGCTTTGTAGTTT	T
chr3:48939899:48940250:+@chr3:48957573:48957618:+@chr3:48974049:48974116:+	AC137630.9	ENSG00000210614	0.23	0.09	0.15	0.32	0.24	0.06	FALSE	TRUE	TRUE	FALSE	TRUE	TACCACCTGTATTTTTTCAGGCC	G
chr4:53988951:53989107:+@chr4:54001506:54001532:+@chr4:54003577:54003631:+	FIP1L1	ENSG00000145216	0.31	0.14	0.22	0.32	0.26	0.09	FALSE	TRUE	TRUE	FALSE	TRUE	TTTCATCACTTGTTTTTTAGGTA	G
chr5:115204986:115205398:-@chr5:115204414:115204530:-@chr5:115201224:115201360:-	ATG12	ENSG00000145782	0.23	0.11	0.08	0.29	0.21	0.11	FALSE	TRUE	TRUE	FALSE	TRUE	tgcttttttcCCCCTCCCAGTTG	T
chr5:139887953:139889565:+@chr5:139895131:139895307:+@chr5:139897158:139897358:+	ANKHD1	ENSG00000131503	0.96	0.67	0.7	0.9	0.92	0.69	FALSE	TRUE	TRUE	FALSE	TRUE	TTGGACCTGTTTTATTTCAGGGT	G
chr5:170759762:170759819:+@chr5:170760448:170760534:+@chr5:170764911:170765012:+	NPM1	ENSG00000181163	0.66	0.46	0.49	0.59	0.59	0.53	FALSE	TRUE	TRUE	FALSE	TRUE	AGATAAATTTCTAATTGCAGTCT	T
chr5:65384990:65386535:+@chr5:65403753:65403875:+@chr5:65406608:65406814:+	ERBB2IP	ENSG00000112851	0.14	0.25	0.12	0.06	0.05	0.25	FALSE	TRUE	TRUE	FALSE	FALSE	TTTTATTTCCTGCTCATTAGAAG	A
chr6:34730380:34730534:-@chr6:34722356:34722553:-@chr6:34682310:34682659:-	C6orf106	ENSG00000196821	0.93	0.81	0.87	0.96	0.9	0.81	FALSE	TRUE	TRUE	FALSE	TRUE	TTTCTTTTGCTTGAACTCAGGGG	G
chr6:41992501:41992655:-@chr6:41984985:41985238:-@chr6:41981070:41983003:-	TRFP	ENSG00000124641	0.9	0.62	0.7	0.81	0.82	0.76	FALSE	TRUE	TRUE	FALSE	TRUE	AGGATCTCTGTCCCTTGCAGGTC	G
chr8:103939417:103939554:-@chr8:103931403:103931548:-@chr8:103924955:103925151:-	AZIN1	ENSG00000155096	0.36	0.09	0.22	0.35	0.35	0.16	FALSE	TRUE	TRUE	FALSE	TRUE	TCTCCCTGTTCTACTTCCAGGGA	G
chr8:104405885:104406902:+@chr8:104409672:104409820:+@chr8:104411059:104411469:+	FZD6	ENSG00000164930	0.81	0.66	0.76	0.86	0.92	0.8	FALSE	TRUE	TRUE	FALSE	TRUE	TTATTCACTATTTTTTGTAGGCA	G
chr8:27665948:27666023:-@chr8:27661931:27662034:-@chr8:27661513:27661715:-	CCDC25	ENSG00000147419	0.79	0.64	0.76	0.86	0.79	0.65	FALSE	TRUE	TRUE	FALSE	TRUE	AAGACAGTCTCTCTTGGCAGGCT	G
chr9:129903409:129903496:+@chr9:129904180:129904215:+@chr9:129904470:129904581:+	SLC25A25	ENSG00000148339	0.06	0.2	0.08	0.06	0.05	0.09	FALSE	TRUE	TRUE	FALSE	FALSE	ATCCTTTGTCTGTCTGTCAGAAT	A
chr9:74169432:74169983:-@chr9:74168206:74168342:-@chr9:74165364:74165523:-	ZFAND5	ENSG00000107372	0.85	0.63	0.77	0.96	0.84	0.51	FALSE	TRUE	TRUE	FALSE	TRUE	TCCTGTTTTCTATCTCCCAGGCC	G
chrX:133860976:133861230:-@chrX:133860786:133860861:-@chrX:133858513:133858730:-	MOSPD1	ENSG00000101928	0.9	0.78	0.75	0.88	0.93	0.81	FALSE	TRUE	TRUE	FALSE	TRUE	ATTGTGACTTTTTCTTTCAGTTT	T
chrX:23711838:23711921:+@chrX:23712332:23712441:+@chrX:23713366:23713467:+	SAT1	ENSG00000130066	0.55	0.16	0.34	0.44	0.47	0.06	FALSE	TRUE	TRUE	FALSE	TRUE	TAATTTGTCCCAATCTTCAGGTT	G

## Sheet: B_Identified patients
BioSample number
U2AF35 wt
SAMN03431152
SAMN03431007
SAMN03431068
SAMN03431049
SAMN03431013
SAMN03431024
SAMN03431038
SAMN03431156
SAMN03431174
SAMN03431200
U2AF35 Q157P
SAMN03418078
SAMN03431048
U2AF35 Q157R
SAMN03431236
SAMN03431034
SAMN03431184

## Sheet: C_Q157PvsWT
	PSI						dPSI
event_name(A3SS)	Q157P	Q157P_ci_low	Q157P_ci_high	wt	wt_ci_low	wt_ci_high	Q157P-wt	bayes_factor	proposed_gname	proposed_gname
chr1:101132777:101133323:-@chr1:101126972|101127008:101126897:-	0.09	0.04	0.17	0.28	0.25	0.32	-0.19	878756	EXTL2	ENSG00000162694
chr1:113031111:113031251:+@chr1:113032473|113033080:113033283:+	0.4	0.36	0.45	0.22	0.21	0.24	0.18	1000000000000	MOV10	ENSG00000155363
chr1:1245699:1245772:-@chr1:1244676|1244767:1244539:-	0.79	0.76	0.82	0.91	0.9	0.92	-0.12	1000000000000	CPSF3L	ENSG00000127054
chr1:143920468:143920793:+@chr1:143960170|143960178:143960251:+	0.73	0.68	0.77	0.9	0.88	0.92	-0.17	1000000000000	NOTCH2NL	ENSG00000213240
chr1:153429201:153429324:-@chr1:153428698|153428725:153428323:-	0.97	0.91	1	0.47	0.42	0.52	0.5	1000000000000	MUC1	ENSG00000185499
chr1:153429201:153429324:-@chr1:153428698|153428725:153428598:-	0.97	0.89	1	0.46	0.42	0.51	0.51	1000000000000	MUC1	ENSG00000185499
chr1:153438676:153438816:-@chr1:153438449|153438529:153438372:-	0.2	0.15	0.25	0.3	0.27	0.32	-0.1	35.24	THBS3	ENSG00000169231
chr1:153849464:153849648:+@chr1:153849840|153849877:153849981:+	0.2	0.15	0.24	0.1	0.09	0.11	0.1	56.91	MSTO1	ENSG00000125459
chr1:154158276:154158333:-@chr1:154157939|154158043:154157790:-	0.76	0.71	0.81	0.62	0.6	0.65	0.14	4152.17	KIAA0907	ENSG00000132680
chr1:1541751:1541857:+@chr1:1548632|1548674:1548942:+	0.55	0.49	0.62	0.39	0.36	0.43	0.16	703.44	MIB2	ENSG00000197530
chr1:154373528:154373647:+@chr1:154374069|154374903:154375172:+	0.73	0.67	0.8	0.87	0.86	0.89	-0.14	67.1	LMNA	ENSG00000160789
chr1:159055735:159055788:+@chr1:159059879|159059921:159060210:+	0.55	0.49	0.61	0.74	0.67	0.8	-0.19	66.7	LY9	ENSG00000122224
chr1:159785425:159785445:-@chr1:159785089|159785092:159784835:-	0.98	0.93	1	0.86	0.82	0.9	0.12	138377	FCGR3A	ENSG00000203747
chr1:1678480:1678609:-@chr1:1677907|1678181:1677802:-	0.28	0.26	0.3	0.16	0.15	0.17	0.12	1000000000000	NADK	ENSG00000008130
chr1:16824857:16825087:-@chr1:16819106|16819327:16818927:-	0.7	0.65	0.75	0.81	0.79	0.83	-0.11	539.67	CROCCL1	ENSG00000215908
chr1:178120450:178120527:+@chr1:178125068|178125071:178125127:+	0.92	0.89	0.94	0.32	0.3	0.34	0.6	1000000000000	TOR1AIP1	ENSG00000143337
chr1:178258456:178258606:+@chr1:178260177|178260180:178260340:+	0.76	0.7	0.82	0.87	0.84	0.89	-0.11	16.8	CEP350	ENSG00000135837
chr1:211212545:211212926:+@chr1:211213389|211213920:211214035:+	0.03	0	0.11	0.23	0.15	0.33	-0.2	58.32	VASH2	ENSG00000143494
chr1:224037625:224037693:+@chr1:224043565|224043584:224044788:+	0.88	0.84	0.91	0.67	0.64	0.69	0.21	1000000000000	SRP9	ENSG00000143742
chr1:241394209:241396041:-@chr1:241386272|241386380:241386146:-	0.85	0.82	0.87	0.74	0.72	0.75	0.11	1000000000000	CEP170	ENSG00000143702
chr1:247118953:247119143:-@chr1:247118681|247118839:247118650:-	0.15	0.09	0.21	0.31	0.27	0.35	-0.16	81.71	ZNF692	ENSG00000171163
chr1:29429830:29430041:-@chr1:29415784|29415911:29415687:-	0.51	0.43	0.59	0.36	0.34	0.39	0.15	24.13	MECR	ENSG00000116353
chr1:31212601:31212744:-@chr1:31211631|31211712:31211416:-	0.52	0.48	0.57	0.68	0.66	0.7	-0.16	1000000000000	PUM1	ENSG00000134644
chr1:3649485:3649614:-@chr1:3649335|3649381:3649228:-	0.22	0.16	0.27	0.36	0.33	0.39	-0.14	283.89	NA	NA
chr1:45572650:45572770:-@chr1:45571756|45571820:45571672:-	0.84	0.79	0.89	0.72	0.7	0.75	0.12	124.8	MUTYH	ENSG00000132781
chr1:45572650:45572770:-@chr1:45571756|45571823:45571672:-	0.75	0.68	0.82	0.62	0.59	0.65	0.13	21.4	MUTYH	ENSG00000132781
chr1:45572650:45572770:-@chr1:45571756|45571853:45571672:-	0.71	0.63	0.78	0.57	0.54	0.6	0.14	12.32	MUTYH	ENSG00000132781
chr1:45572650:45572770:-@chr1:45571756|45571862:45571672:-	0.68	0.6	0.76	0.54	0.51	0.57	0.14	15.54	MUTYH	ENSG00000132781
chr1:77960297:77960469:-@chr1:77960174|77960198:77960104:-	0.83	0.79	0.87	0.6	0.57	0.62	0.23	1000000000000	USP33	ENSG00000077254
chr1_random:335635:335711:+@chr1_random:336122|337148:337249:+	0.67	0.62	0.72	0.81	0.79	0.83	-0.14	4.85217e+06	NA	NA
chr10:102011726:102011810:-@chr10:102010775|102010791:102010713:-	0.61	0.54	0.68	0.79	0.77	0.81	-0.18	201150	CWF19L1	ENSG00000095485
chr10:105201903:105202065:-@chr10:105200929|105201032:105200830:-	0.4	0.31	0.49	0.55	0.51	0.58	-0.15	6.71	CALHM2	ENSG00000138172
chr10:112625714:112625818:+@chr10:112630981|112631023:112631283:+	0.62	0.6	0.65	0.81	0.8	0.82	-0.19	1000000000000	PDCD4	ENSG00000150593
chr10:115880896:115881085:-@chr10:115879720|115880418:115879640:-	0.35	0.32	0.38	0.23	0.22	0.24	0.12	1000000000000	C10orf118	ENSG00000165813
chr10:124912118:124912334:+@chr10:124913326|124914553:124914876:+	0.55	0.54	0.57	0.69	0.68	0.7	-0.14	1000000000000	BUB3	ENSG00000154473
chr10:44797975:44798117:+@chr10:44799395|44799476:44799567:+	0.3	0.24	0.37	0.13	0.12	0.15	0.17	8.46843e+07	RASSF4	ENSG00000107551
chr10:64623111:64623238:-@chr10:64622863|64622917:64622704:-	0.97	0.95	0.98	0.85	0.84	0.86	0.12	1000000000000	JMJD1C	ENSG00000171988
chr10:82158222:82158379:+@chr10:82170202|82170219:82170381:+	0.4	0.32	0.48	0.63	0.53	0.72	-0.23	46	C10orf57	ENSG00000122378
chr11:116235191:116235530:-@chr11:116234445|116234625:116233736:-	0.53	0.49	0.57	0.63	0.61	0.64	-0.1	309.73	AP006216.9	ENSG00000160584
chr11:117910191:117910280:+@chr11:117910432|117911433:117911757:+	0.91	0.84	0.97	0.69	0.65	0.72	0.22	1000000000000	TMEM25	ENSG00000149582
chr11:118467333:118467446:+@chr11:118468045|118468324:118468443:+	0.74	0.67	0.81	0.98	0.95	1	-0.24	1000000000000	HMBS	ENSG00000149397
chr11:118558013:118558264:+@chr11:118559037|118559740:118559936:+	0.82	0.77	0.86	0.92	0.9	0.94	-0.1	1.74842e+06	NLRX1	ENSG00000160703
chr11:47239368:47239576:+@chr11:47239674|47240046:47240145:+	0.54	0.48	0.6	0.75	0.72	0.78	-0.21	1000000000000	NR1H3	ENSG00000025434
chr11:494824:494996:-@chr11:492181|492249:492062:-	0.48	0.45	0.52	0.6	0.59	0.61	-0.12	1000000000000	RNH1	ENSG00000023191
chr11:58667132:58667353:+@chr11:58667546|58669876:58669905:+	0.61	0.57	0.65	0.5	0.48	0.52	0.11	9.26763e+07	FAM111A	ENSG00000166801
chr11:63032601:63032689:+@chr11:63032823|63032826:63033039:+	0.09	0.01	0.19	0.38	0.34	0.42	-0.29	6.86948e+06	LGALS12	ENSG00000133317
chr11:63205498:63205826:+@chr11:63242750|63243029:63245080:+	0.22	0.19	0.26	0.12	0.1	0.13	0.1	1000000000000	RTN3	ENSG00000133318
chr11:6459037:6459171:-@chr11:6458229|6458269:6458129:-	0.62	0.57	0.67	0.45	0.43	0.47	0.17	1000000000000	ARFIP2	ENSG00000132254
chr11:65526087:65526213:-@chr11:65524528|65524552:65524350:-	0.63	0.55	0.7	0.45	0.42	0.49	0.18	8209.81	EIF1AD	ENSG00000175376
chr11:6581540:6581628:+@chr11:6581986|6582032:6582166:+	0.27	0.24	0.29	0.38	0.37	0.4	-0.11	1000000000000	ILK	ENSG00000166333
chr11:66124536:66124596:+@chr11:66129201|66129386:66129463:+	0.21	0.18	0.24	0.1	0.09	0.11	0.11	1000000000000	CCS	ENSG00000173992
chr11:72206449:72206548:+@chr11:72210241|72210361:72210434:+	0.73	0.7	0.76	0.49	0.47	0.5	0.24	1000000000000	ATG16L2	ENSG00000168010
chr11:76587188:76587314:+@chr11:76588228|76588342:76588511:+	0.2	0.13	0.28	0.06	0.04	0.11	0.14	106.94	MYO7A	ENSG00000137474
chr11:93980253:93980453:+@chr11:93980999|93981397:93981500:+	0.27	0.25	0.3	0.11	0.1	0.12	0.16	1000000000000	PIWIL4	ENSG00000134627
chr12:104038463:104038505:+@chr12:104038997|104039009:104039112:+	0.24	0.2	0.29	0.14	0.12	0.15	0.1	1.1962e+09	KIAA1033	ENSG00000136051
chr12:108015435:108015676:-@chr12:108014975|108015125:108014695:-	0.86	0.79	0.91	0.68	0.66	0.71	0.18	2213.62	ALKBH2	ENSG00000189046
chr12:111839735:111839888:+@chr12:111841577|111841675:111842095:+	0.51	0.45	0.57	0.87	0.85	0.89	-0.36	1000000000000	OAS1	ENSG00000089127
chr12:119485131:119485256:+@chr12:119485518|119485533:119485809:+	0.18	0.16	0.2	0.28	0.28	0.29	-0.1	1000000000000	RNF10	ENSG00000022840
chr12:120252769:120252858:-@chr12:120250644|120250683:120250502:-	0.76	0.74	0.79	0.56	0.55	0.57	0.2	1000000000000	ANAPC5	ENSG00000089053
chr12:122027371:122027470:+@chr12:122028860|122028942:122029069:+	0.56	0.49	0.63	0.39	0.37	0.41	0.17	291.58	OGFOD2	ENSG00000111325
chr12:122031629:122031799:+@chr12:122032071|122032095:122032379:+	0.51	0.49	0.54	0.39	0.38	0.4	0.12	1000000000000	ARL6IP4	ENSG00000182196
chr12:131115166:131115384:+@chr12:131117272|131117293:131117467:+	0.38	0.32	0.44	0.64	0.6	0.68	-0.26	1000000000000	EP400	ENSG00000183495
chr12:131957383:131957442:-@chr12:131956457|131956493:131956278:-	0.2	0.15	0.26	0.39	0.36	0.42	-0.19	2.42434e+11	CHFR	ENSG00000072609
chr12:49080917:49081078:+@chr12:49107812|49107815:49107959:+	0.8	0.73	0.86	0.9	0.87	0.92	-0.1	5.35	LARP4	ENSG00000161813
chr12:51699961:51700077:+@chr12:51701767|51701857:51701911:+	0.86	0.81	0.91	0.73	0.71	0.76	0.13	192.83	EIF4B	ENSG00000063046
chr12:54813832:54813924:+@chr12:54814131|54814161:54814232:+	0.25	0.22	0.28	0.09	0.09	0.1	0.16	1000000000000	FAM62A	ENSG00000139641
chr12:56197756:56197803:-@chr12:56197474|56197488:56197319:-	0.96	0.94	0.98	0.84	0.83	0.86	0.12	1000000000000	DDIT3	ENSG00000175197
chr12:56197756:56197803:-@chr12:56197474|56197569:56197319:-	0.91	0.87	0.95	0.71	0.7	0.73	0.2	1000000000000	DDIT3	ENSG00000175197
chr12:56197756:56197803:-@chr12:56197474|56197592:56197319:-	0.92	0.89	0.96	0.75	0.73	0.76	0.17	1000000000000	DDIT3	ENSG00000175197
chr12:56197756:56197803:-@chr12:56197474|56197645:56197319:-	0.92	0.89	0.95	0.75	0.74	0.77	0.17	1000000000000	DDIT3	ENSG00000175197
chr12:56197756:56197803:-@chr12:56197569|56197592:56197319:-	0.71	0.64	0.77	0.87	0.85	0.89	-0.16	4.22485e+11	DDIT3	ENSG00000175197
chr12:56197756:56197803:-@chr12:56197569|56197645:56197319:-	0.77	0.72	0.82	0.88	0.86	0.9	-0.11	1496.42	DDIT3	ENSG00000175197
chr13:112880489:112880602:-@chr13:112880291|112880323:112879927:-	0.79	0.74	0.84	0.67	0.65	0.69	0.12	90.72	PCID2	ENSG00000126226
chr13:113576298:113576419:+@chr13:113578089|113578218:113578336:+	0.07	0.06	0.09	0.19	0.17	0.21	-0.12	1000000000000	GAS6	ENSG00000183087
chr13:36491479:36491534:-@chr13:36489465|36489501:36489382:-	0.78	0.73	0.83	0.67	0.64	0.69	0.11	54.18	FAM48A	ENSG00000102710
chr14:20528463:20528597:+@chr14:20530091|20530123:20530204:+	0.49	0.46	0.52	0.33	0.31	0.34	0.16	1000000000000	METT11D1	ENSG00000165792
chr14:22603404:22603537:-@chr14:22603270|22603306:22603154:-	0.69	0.67	0.71	0.82	0.81	0.82	-0.13	1000000000000	ACIN1	ENSG00000100813
chr14:23102429:23102551:-@chr14:23101642|23102331:23101553:-	0.38	0.36	0.41	0.23	0.22	0.23	0.15	1000000000000	AP1G2	ENSG00000213983
chr14:23103382:23103437:-@chr14:23103208|23103270:23103095:-	0.39	0.36	0.42	0.27	0.26	0.28	0.12	1000000000000	AP1G2	ENSG00000213983
chr14:68992202:68992336:+@chr14:68994833|68998167:68998860:+	0.94	0.91	0.98	0.84	0.82	0.85	0.1	6.1832e+11	SLC39A9	ENSG00000029364
chr14:93646832:93646896:+@chr14:93647724|93647758:93647872:+	0.64	0.61	0.67	0.54	0.52	0.56	0.1	1000000000000	IFI27	ENSG00000165949
chr15:39815671:39816188:+@chr15:39819396|39819543:39819693:+	0.34	0.29	0.41	0.47	0.43	0.5	-0.13	18.12	MGA	ENSG00000174197
chr15:40521563:40521904:-@chr15:40519042|40519303:40518523:-	0.91	0.88	0.93	0.78	0.77	0.79	0.13	1000000000000	ZFP106	ENSG00000103994
chr15:57170550:57170645:+@chr15:57172004|57172028:57172131:+	0.52	0.45	0.59	0.31	0.29	0.34	0.21	7.61405e+11	RNF111	ENSG00000157450
chr15:62216113:62216184:+@chr15:62216820|62217294:62223486:+	0.85	0.83	0.87	0.97	0.96	0.97	-0.12	1000000000000	SNX1	ENSG00000028528
chr15:92700370:92700534:+@chr15:92702715|92702780:92702845:+	0.37	0.32	0.41	0.55	0.52	0.57	-0.18	1000000000000	MCTP2	ENSG00000140563
chr16:15626127:15626285:-@chr16:15624454|15624481:15624292:-	0.78	0.73	0.83	0.62	0.59	0.65	0.16	3.87386e+06	KIAA0430	ENSG00000166783
chr16:15626127:15626285:-@chr16:15624454|15624484:15624292:-	0.62	0.54	0.69	0.43	0.4	0.47	0.19	574793	KIAA0430	ENSG00000166783
chr16:20732013:20732125:+@chr16:20733750|20733808:20733876:+	0.74	0.68	0.79	0.87	0.85	0.9	-0.13	134190	AC004381.6	ENSG00000005189
chr16:21077413:21077568:+@chr16:21079800|21079907:21080100:+	0.76	0.67	0.83	0.61	0.59	0.64	0.15	9.43	TMEM159	ENSG00000011638
chr16:28754755:28754944:+@chr16:28755550|28755573:28756059:+	0.72	0.69	0.75	0.53	0.52	0.55	0.19	1000000000000	ATXN2L	ENSG00000168488
chr16:28754755:28754998:+@chr16:28755550|28755573:28756059:+	0.64	0.58	0.7	0.48	0.45	0.5	0.16	4.754e+10	ATXN2L	ENSG00000168488
chr16:2970288:2970475:-@chr16:2969914|2969938:2969810:-	0.24	0.2	0.28	0.14	0.12	0.17	0.1	4951.25	PKMYT1	ENSG00000127564
chr16:29739288:29739332:+@chr16:29749296|29749337:29749496:+	0.32	0.27	0.37	0.22	0.2	0.23	0.1	313.6	C16orf53	ENSG00000185928
chr16:29919751:29919862:+@chr16:29920034|29920236:29920352:+	0.44	0.41	0.46	0.31	0.3	0.32	0.13	1000000000000	INO80E	ENSG00000169592
chr16:387193:387314:+@chr16:388209|388991:389124:+	0.22	0.2	0.25	0.42	0.41	0.44	-0.2	1000000000000	NME4	ENSG00000103200
chr16:49267182:49267333:-@chr16:49259453|49260560:49257712:-	0.78	0.72	0.83	0.96	0.95	0.96	-0.18	1000000000000	SNX20	ENSG00000167208
chr16:56241666:56241764:+@chr16:56242598|56242656:56243035:+	0.86	0.8	0.91	0.68	0.66	0.71	0.18	1000000000000	GPR56	ENSG00000205336
chr16:57108213:57108333:+@chr16:57109425|57109456:57109636:+	0.52	0.44	0.61	0.3	0.28	0.33	0.22	2.56396e+08	SETD6	ENSG00000103037
chr16:67724000:67724093:+@chr16:67724862|67724916:67725022:+	0.56	0.5	0.61	0.67	0.64	0.69	-0.11	53.07	CIRH1A	ENSG00000141076
chr16:82778008:82778177:-@chr16:82776006|82776167:82775958:-	0.91	0.87	0.95	0.79	0.77	0.81	0.12	3403.97	TAF1C	ENSG00000103168
chr16:88289202:88289254:+@chr16:88289504|88289638:88290263:+	0.85	0.8	0.89	0.95	0.94	0.96	-0.1	2727.54	CDK10	ENSG00000185324
chr16:88566489:88566674:+@chr16:88571548|88571587:88571711:+	0.84	0.76	0.9	0.68	0.64	0.72	0.16	756.35	AFG3L1	ENSG00000214234
chr17:1563747:1564058:-@chr17:1562443|1562939:1561548:-	0.66	0.62	0.69	0.8	0.78	0.81	-0.14	1000000000000	hsa-mir-22	ENSG00000199060
chr17:22657935:22658035:+@chr17:22658897|22660253:22660425:+	0.51	0.49	0.52	0.29	0.28	0.29	0.22	1000000000000	WSB1	ENSG00000109046
chr17:31664857:31664971:+@chr17:31665374|31665578:31665959:+	0.24	0.2	0.28	0.35	0.34	0.36	-0.11	423.29	CCL4L2	ENSG00000197262
chr17:35067554:35067631:+@chr17:35067752|35068184:35068301:+	0.64	0.54	0.74	0.88	0.84	0.91	-0.24	2525.32	STARD3	ENSG00000131748
chr17:37875634:37875762:+@chr17:37883183|37883204:37883286:+	0.5	0.41	0.59	0.29	0.26	0.31	0.21	85652.1	ATP6V0A1	ENSG00000033627
chr17:37967618:37967763:+@chr17:37967900|37968156:37968866:+	0.52	0.48	0.56	0.64	0.62	0.65	-0.12	1.97607e+11	COASY	ENSG00000068120
chr17:37967618:37967763:+@chr17:37967900|37968477:37968866:+	0.74	0.7	0.77	0.84	0.83	0.85	-0.1	1000000000000	COASY	ENSG00000068120
chr17:39620100:39620637:+@chr17:39621829|39621916:39622482:+	0.84	0.81	0.87	0.73	0.71	0.75	0.11	1.00859e+10	TMUB2	ENSG00000168591
chr17:40361713:40361918:-@chr17:40361445|40361472:40360920:-	0.94	0.89	0.98	0.82	0.78	0.86	0.12	73.74	KIF18B	ENSG00000186185
chr17:44659008:44659119:-@chr17:44657365|44657492:44655731:-	0.59	0.53	0.65	0.43	0.37	0.49	0.16	56.54	PHOSPHO1	ENSG00000173868
chr17:46298418:46298714:-@chr17:46296320|46296523:46294586:-	0.57	0.52	0.63	0.7	0.68	0.72	-0.13	71.59	TOB1	ENSG00000141232
chr17:4735028:4735201:+@chr17:4735527|4735587:4735787:+	0.68	0.61	0.74	0.79	0.76	0.81	-0.11	7.48	MINK1	ENSG00000141503
chr17:53739160:53739328:-@chr17:53738746|53738773:53738702:-	0.54	0.5	0.59	0.32	0.29	0.36	0.22	1000000000000	BZRAP1	ENSG00000005379
chr17:53769808:53770039:+@chr17:53784095|53784104:53784274:+	0.63	0.54	0.72	0.83	0.8	0.86	-0.2	167794	NA	NA
chr17:6920776:6920847:-@chr17:6920114|6920195:6920028:-	0.22	0.17	0.27	0.33	0.3	0.35	-0.11	97.73	CLEC10A	ENSG00000132514
chr17:70777790:70777921:-@chr17:70777124|70777145:70777023:-	0.44	0.36	0.52	0.7	0.67	0.73	-0.26	5.15723e+06	MIF4GD	ENSG00000125457
chr17:71099914:71099977:+@chr17:71100104|71100140:71100217:+	0.33	0.3	0.37	0.07	0.07	0.08	0.26	1000000000000	AC087749.12-1	ENSG00000204326
chr17:77603052:77603129:+@chr17:77603424|77603540:77603624:+	0.82	0.74	0.9	0.68	0.64	0.71	0.14	8.14	GPS1	ENSG00000169727
chr17:8680833:8680965:-@chr17:8680658|8680758:8680589:-	0.2	0.15	0.25	0.1	0.09	0.11	0.1	402.12	PIK3R6	ENSG00000174083
chr18:12974039:12974189:+@chr18:12975239|12976861:12977536:+	0.95	0.91	0.98	0.83	0.82	0.85	0.12	1000000000000	SEH1L	ENSG00000085415
chr18:13104129:13104250:+@chr18:13106373|13106376:13106502:+	0.44	0.36	0.52	0.59	0.56	0.61	-0.15	11.56	CEP192	ENSG00000101639
chr18:9604224:9604268:-@chr18:9585100|9585151:9585016:-	0.65	0.57	0.73	0.28	0.25	0.31	0.37	1000000000000	PPP4R1	ENSG00000154845
chr19:10258650:10259082:+@chr19:10259212|10259289:10259514:+	0.64	0.55	0.72	0.86	0.84	0.88	-0.22	1000000000000	ICAM4	ENSG00000105371
chr19:11419254:11419433:+@chr19:11419508|11419538:11419604:+	0.83	0.79	0.87	0.67	0.65	0.69	0.16	1000000000000	PRKCSH	ENSG00000130175
chr19:17301566:17301640:-@chr19:17300792|17301350:17299971:-	0.32	0.25	0.39	0.15	0.13	0.17	0.17	1.627e+07	ANO8	ENSG00000074855
chr19:17309356:17309473:+@chr19:17309708|17309817:17310064:+	0.13	0.08	0.2	0.25	0.2	0.31	-0.12	5.62	GTPBP3	ENSG00000130299
chr19:17311243:17311408:+@chr19:17312853|17312916:17313131:+	0.6	0.52	0.68	0.76	0.72	0.79	-0.16	90.99	GTPBP3	ENSG00000130299
chr19:1763185:1763270:-@chr19:1762665|1762883:1762488:-	0.87	0.79	0.92	0.98	0.97	0.99	-0.11	312.22	ATP8B3	ENSG00000130270
chr19:18560805:18560887:+@chr19:18561223|18561289:18561493:+	0.93	0.9	0.96	0.79	0.78	0.81	0.14	1000000000000	C19orf60	ENSG00000006015
chr19:1991133:1991176:-@chr19:1988828|1990855:1988470:-	0.84	0.82	0.85	0.94	0.93	0.95	-0.1	1000000000000	MKNK2	ENSG00000099875
chr19:40814073:40814147:+@chr19:40815819|40815840:40815994:+	0.3	0.24	0.36	0.46	0.43	0.5	-0.16	1.01131e+08	RBM42	ENSG00000126254
chr19:40928089:40928176:-@chr19:40927928|40927953:40927866:-	0.42	0.35	0.48	0.16	0.14	0.19	0.26	1000000000000	U2AF1L4	ENSG00000161265
chr19:4126677:4126757:-@chr19:4126108|4126148:4126025:-	0.85	0.77	0.91	0.96	0.94	0.97	-0.11	25.02	SIRT6	ENSG00000077463
chr19:44628056:44628117:+@chr19:44628284|44628362:44628445:+	0.89	0.86	0.92	0.77	0.75	0.79	0.12	1000000000000	SUPT5H	ENSG00000196235
chr19:45546172:45546515:+@chr19:45564131|45564166:45564257:+	0.11	0.07	0.16	0.28	0.26	0.31	-0.17	2367.61	AC118344.2-2	ENSG00000205039
chr19:46580517:46580666:+@chr19:46581460|46581608:46581827:+	0.46	0.42	0.5	0.56	0.53	0.58	-0.1	101.73	TMEM91	ENSG00000221901
chr19:46580517:46580666:+@chr19:46581460|46581631:46581827:+	0.89	0.85	0.93	0.78	0.75	0.81	0.11	46.57	TMEM91	ENSG00000221901
chr19:46580517:46580666:+@chr19:46581608|46581631:46581827:+	0.94	0.91	0.97	0.83	0.8	0.85	0.11	7.20879e+07	TMEM91	ENSG00000221901
chr19:46580517:46580666:+@chr19:46581619|46581631:46581827:+	0.79	0.71	0.87	0.62	0.58	0.67	0.17	25.47	TMEM91	ENSG00000221901
chr19:46777546:46777821:+@chr19:46782540|46782543:46782636:+	0.19	0.14	0.25	0.36	0.3	0.41	-0.17	4258.15	CEACAM21	ENSG00000007129
chr19:47295519:47295610:-@chr19:47292187|47292235:47292074:-	0.53	0.48	0.59	0.3	0.27	0.33	0.23	1000000000000	POU2F2	ENSG00000028277
chr19:55062123:55062286:-@chr19:55061514|55061597:55061468:-	0.09	0.07	0.12	0.22	0.2	0.24	-0.13	1000000000000	PNKP	ENSG00000039650
chr19:58286702:58286785:-@chr19:58286594|58286618:58286478:-	0.23	0.16	0.32	0.4	0.36	0.46	-0.17	11.84	ZNF160	ENSG00000170949
chr19:59294851:59294883:-@chr19:59292263|59292384:59291961:-	0.7	0.64	0.76	0.47	0.45	0.49	0.23	1000000000000	OSCAR	ENSG00000170909
chr19:59414042:59414094:-@chr19:59413155|59413158:59413000:-	0.44	0.37	0.52	0.32	0.3	0.34	0.12	10.39	LILRB3	ENSG00000186152
chr19:59414810:59414926:-@chr19:59414519|59414547:59414444:-	0.16	0.1	0.23	0.06	0.04	0.07	0.1	18.79	LILRB3	ENSG00000186152
chr19:61361675:61361783:+@chr19:61362805|61362808:61364074:+	0.77	0.69	0.84	0.63	0.59	0.68	0.14	5.89	ZNF444	ENSG00000167685
chr19:63449479:63449605:+@chr19:63449889|63449924:63449972:+	0.71	0.66	0.76	0.59	0.56	0.63	0.12	53.82	ZNF544	ENSG00000198131
chr19:7506395:7506463:+@chr19:7506675|7506819:7506906:+	0.9	0.83	0.95	0.78	0.75	0.8	0.12	28.63	PNPLA6	ENSG00000032444
chr19:9312778:9312860:+@chr19:9313293|9313371:9315521:+	0.27	0.21	0.34	0.45	0.42	0.48	-0.18	373548	ZNF559	ENSG00000188321
chr2:101841890:101841976:+@chr2:101842537|101842630:101842758:+	0.56	0.52	0.59	0.45	0.43	0.47	0.11	1.87645e+06	MAP4K4	ENSG00000071054
chr2:109934562:109934649:+@chr2:109936771|109936916:109936980:+	0.96	0.92	0.98	0.8	0.75	0.84	0.16	1000000000000	RGPD5	ENSG00000015568
chr2:111025364:111025451:-@chr2:111023097|111023242:111023033:-	0.94	0.9	0.97	0.78	0.74	0.82	0.16	156.32	RGPD7	ENSG00000184538
chr2:112880345:112880432:-@chr2:112878078|112878223:112878014:-	0.96	0.92	0.98	0.79	0.75	0.84	0.17	1000000000000	RGPD8	ENSG00000169629
chr2:113659413:113659488:+@chr2:113659710|113660009:113660303:+	0.46	0.42	0.51	0.59	0.57	0.62	-0.13	4.96418e+07	PSD4	ENSG00000125637
chr2:156891476:156891678:-@chr2:156890965|156891032:156890908:-	0.32	0.27	0.37	0.21	0.2	0.22	0.11	5.62032e+06	NR4A2	ENSG00000153234
chr2:156891476:156891678:-@chr2:156890965|156891086:156890908:-	0.75	0.71	0.79	0.57	0.55	0.58	0.18	1000000000000	NR4A2	ENSG00000153234
chr2:192255463:192255566:+@chr2:192256261|192256700:192256775:+	0.31	0.26	0.37	0.5	0.48	0.52	-0.19	1000000000000	OBFC2A	ENSG00000173559
chr2:201461924:201462094:-@chr2:201460653|201460794:201460581:-	0.25	0.21	0.29	0.13	0.12	0.14	0.12	1000000000000	PPIL3	ENSG00000115934
chr2:201733400:201733910:+@chr2:201735964|201736803:201745656:+	0.4	0.38	0.41	0.5	0.49	0.5	-0.1	1000000000000	AC007283.3-4	ENSG00000197791
chr2:233360104:233360283:+@chr2:233363652|233363670:233363869:+	0.83	0.78	0.87	0.93	0.92	0.94	-0.1	537534	GIGYF2	ENSG00000204120
chr2:239720878:239721076:-@chr2:239713312|239713327:239713089:-	0.27	0.2	0.35	0.66	0.62	0.71	-0.39	1000000000000	HDAC4	ENSG00000068024
chr2:27398819:27398893:-@chr2:27389445|27389525:27389365:-	0.85	0.76	0.92	0.65	0.61	0.68	0.2	27.59	MPV17	ENSG00000115204
chr2:3583852:3584463:+@chr2:3584869|3584913:3585194:+	0.2	0.12	0.29	0.41	0.36	0.46	-0.21	26.31	NA	NA
chr2:37237555:37237694:-@chr2:37229670|37229904:37229504:-	0.52	0.47	0.56	0.64	0.61	0.67	-0.12	59961.3	EIF2AK2	ENSG00000055332
chr2:64064502:64064657:-@chr2:64062489|64062525:64062284:-	0.51	0.46	0.55	0.39	0.37	0.42	0.12	1812.27	VPS54	ENSG00000143952
chr2:68143581:68143663:-@chr2:68133773|68133922:68133697:-	0.17	0.13	0.21	0.07	0.06	0.09	0.1	201634	C1D	ENSG00000197223
chr2:88117577:88117685:-@chr2:88114865|88114926:88114768:-	0.72	0.68	0.77	0.6	0.58	0.62	0.12	206	KRCC1	ENSG00000172086
chr2:96666385:96666649:-@chr2:96660946|96661007:96660776:-	0.12	0.09	0.15	0.26	0.24	0.28	-0.14	1000000000000	KIAA1310	ENSG00000114982
chr20:18087728:18087909:+@chr20:18090464|18090467:18090883:+	0.72	0.63	0.81	0.54	0.5	0.57	0.18	50.72	CSRP2BP	ENSG00000149474
chr20:44426417:44426471:-@chr20:44420809|44421004:44420433:-	0.46	0.43	0.5	0.35	0.33	0.36	0.11	1000000000000	SLC35C2	ENSG00000080189
chr20:44460743:44460817:-@chr20:44456549|44456578:44456451:-	0.85	0.8	0.88	0.75	0.72	0.77	0.1	134.83	ELMO2	ENSG00000062598
chr20:45372207:45372355:-@chr20:45361023|45361098:45360880:-	0.48	0.43	0.54	0.59	0.57	0.61	-0.11	25.12	ZMYND8	ENSG00000101040
chr20:4614797:4615158:+@chr20:4627857|4627862:4630234:+	0.95	0.9	0.97	0.85	0.77	0.87	0.1	5.41683e+06	PRNP	ENSG00000171867
chr20:5037978:5038091:-@chr20:5034868|5034956:5034834:-	0.49	0.44	0.54	0.64	0.61	0.66	-0.15	1.80834e+07	C20orf30	ENSG00000089063
chr21:33896410:33896521:-@chr21:33893424|33893461:33893326:-	0.26	0.23	0.3	0.15	0.14	0.16	0.11	1000000000000	CRYZL1	ENSG00000205758
chr21:37766856:37767052:+@chr21:37772353|37772380:37772472:+	0.19	0.16	0.21	0.09	0.08	0.09	0.1	1000000000000	DYRK1A	ENSG00000157540
chr21:45770159:45770300:-@chr21:45759494|45760482:45759057:-	0.96	0.94	0.98	0.82	0.8	0.84	0.14	1000000000000	SLC19A1	ENSG00000173638
chr21:46559816:46559889:-@chr21:46559222|46559391:46559058:-	0.77	0.68	0.85	0.62	0.58	0.66	0.15	8.65	C21orf58	ENSG00000160298
chr22:14570681:14570791:-@chr22:14569378|14569411:14569264:-	0.85	0.75	0.94	0.69	0.67	0.72	0.16	5.25	NA	NA
chr22:18782340:18782440:-@chr22:18778694|18778723:18778537:-	0.17	0.11	0.23	0.31	0.29	0.34	-0.14	1319.25	PI4KAP1	ENSG00000215513
chr22:22509251:22509341:-@chr22:22507119|22509149:22506690:-	0.63	0.59	0.68	0.79	0.76	0.81	-0.16	3.89184e+11	DERL3	ENSG00000099958
chr22:22645957:22646132:-@chr22:22645532|22645536:22645293:-	0.05	0.02	0.1	0.25	0.2	0.31	-0.2	2.93012e+09	DDT	ENSG00000099977
chr22:25389280:25389362:+@chr22:25391421|25391495:25392900:+	0.4	0.3	0.5	0.23	0.18	0.29	0.17	5.25	NA	NA
chr22:30559901:30559966:+@chr22:30562958|30562985:30563141:+	0.33	0.25	0.41	0.5	0.45	0.54	-0.17	22.22	DEPDC5	ENSG00000100150
chr22:34886663:34886923:-@chr22:34875136|34875365:34875040:-	0.65	0.6	0.7	0.5	0.47	0.54	0.15	6.60641e+07	APOL3	ENSG00000128284
chr22:36533858:36534116:+@chr22:36535902|36535980:36536110:+	0.57	0.49	0.65	0.13	0.11	0.15	0.44	1000000000000	GCAT	ENSG00000100116
chr22:40519779:40519860:+@chr22:40520244|40520321:40520427:+	0.3	0.26	0.35	0.15	0.13	0.17	0.15	1000000000000	MEI1	ENSG00000167077
chr22:48573686:48573946:-@chr22:48567146|48567539:48567042:-	0.71	0.67	0.74	0.57	0.55	0.59	0.14	5.37039e+10	BRD1	ENSG00000100425
chr22:48986873:48987076:+@chr22:48989044|48989092:48989272:+	0.42	0.35	0.48	0.59	0.56	0.62	-0.17	120556	RP3-402G11.5	ENSG00000073169
chr22:49315199:49315380:-@chr22:49315014|49315026:49314791:-	0.21	0.17	0.25	0.31	0.3	0.33	-0.1	403.9	TYMP	ENSG00000025708
chr3:33113215:33113318:-@chr3:33110284|33110799:33106912:-	0.46	0.41	0.51	0.34	0.32	0.36	0.12	80081.8	TMPPE	ENSG00000188167
chr3:42572426:42572491:-@chr3:42565153|42569944:42564463:-	0.65	0.62	0.67	0.48	0.48	0.49	0.17	1000000000000	SEC22C	ENSG00000093183
chr3:42636160:42636204:+@chr3:42636512|42637925:42638012:+	0.79	0.74	0.84	0.9	0.88	0.91	-0.11	75.89	NKTR	ENSG00000114857
chr3:47869657:47869846:-@chr3:47869432|47869533:47867190:-	0.69	0.66	0.73	0.5	0.49	0.51	0.19	1000000000000	MAP4	ENSG00000047849
chr3:49019830:49019968:+@chr3:49023858|49024072:49026553:+	0.14	0.13	0.16	0.24	0.23	0.25	-0.1	1000000000000	WDR6	ENSG00000178252
chr3:49130384:49130557:-@chr3:49130222|49130267:49130094:-	0.78	0.74	0.82	0.64	0.62	0.66	0.14	1000000000000	USP19	ENSG00000172046
chr3:50363301:50363419:+@chr3:50363778|50363844:50363995:+	0.31	0.26	0.35	0.44	0.42	0.46	-0.13	6.56341e+08	CYB561D2	ENSG00000114395
chr3:51983021:51983686:-@chr3:51980754|51980948:51980516:-	0.11	0.09	0.13	0.25	0.24	0.26	-0.14	1000000000000	ABHD14B	ENSG00000114779
chr3:56647774:56647833:-@chr3:56642911|56643034:56642112:-	0.83	0.79	0.86	0.73	0.71	0.75	0.1	316329	C3orf63	ENSG00000163946
chr4:103967719:103967843:-@chr4:103966928|103967136:103966777:-	0.35	0.34	0.36	0.46	0.45	0.46	-0.11	1000000000000	UBE2D3	ENSG00000109332
chr4:113456406:113456457:+@chr4:113518283|113518335:113518503:+	0.49	0.4	0.58	0.74	0.69	0.79	-0.25	1.24843e+08	ALPK1	ENSG00000073331
chr4:15265925:15266111:-@chr4:15255378|15255429:15255214:-	0.71	0.68	0.73	0.85	0.84	0.86	-0.14	1000000000000	FBXL5	ENSG00000118564
chr4:154824891:154824962:+@chr4:154828504|154828538:154828649:+	0.81	0.73	0.87	0.91	0.89	0.93	-0.1	7.92	NA	NA
chr4:1689677:1690151:-@chr4:1689200|1689228:1689041:-	0.09	0.06	0.13	0.21	0.19	0.22	-0.12	2.06359e+08	TMEM129	ENSG00000168936
chr4:169558552:169558704:-@chr4:169553850|169553853:169553685:-	0.52	0.48	0.56	0.24	0.22	0.26	0.28	1000000000000	DDX60L	ENSG00000181381
chr4:17433704:17433844:+@chr4:17434368|17434393:17434491:+	0.79	0.75	0.83	0.96	0.95	0.97	-0.17	1000000000000	HCAP-G	ENSG00000109805
chr4:1923633:1923756:+@chr4:1924277|1924849:1925049:+	0.43	0.41	0.46	0.23	0.22	0.24	0.2	1000000000000	WHSC1	ENSG00000109685
chr4:8257794:8257993:+@chr4:8262292|8262375:8262449:+	0.56	0.52	0.61	0.46	0.43	0.49	0.1	13.53	SH3TC1	ENSG00000125089
chr4:82596829:82596966:-@chr4:82588459|82588462:82588247:-	0.4	0.33	0.47	0.53	0.51	0.54	-0.13	23.48	RASGEF1B	ENSG00000138670
chr4:8284603:8284783:+@chr4:8285035|8285990:8286140:+	0.24	0.23	0.26	0.38	0.37	0.39	-0.14	1000000000000	SH3TC1	ENSG00000125089
chr4:850744:851220:-@chr4:850289|850322:850152:-	0.35	0.31	0.39	0.53	0.51	0.55	-0.18	1000000000000	GAK	ENSG00000178950
chr5:102388734:102388937:+@chr5:102391785|102391788:102391841:+	0.43	0.35	0.52	0.28	0.24	0.33	0.15	7.39	PAM	ENSG00000145730
chr5:176892050:176892248:-@chr5:176891738|176891807:176891560:-	0.84	0.78	0.88	0.73	0.71	0.76	0.11	18.26	AC145098.2-2	ENSG00000146067
chr5:177582459:177582541:-@chr5:177582099|177582187:177581962:-	0.98	0.96	0.99	0.86	0.85	0.88	0.12	1000000000000	AGXT2L2	ENSG00000175309
chr5:38982327:38982411:-@chr5:38981469|38981583:38981350:-	0.89	0.86	0.92	0.78	0.77	0.8	0.11	1000000000000	AC026713.5	ENSG00000164327
chr5:56578659:56578799:+@chr5:56580993|56581038:56581160:+	0.89	0.88	0.91	0.77	0.76	0.78	0.12	1000000000000	GPBP1	ENSG00000062194
chr5:74921925:74922021:+@chr5:74925459|74925547:74925630:+	0.87	0.79	0.93	0.74	0.7	0.78	0.13	5.46	POLK	ENSG00000122008
chr5:88060066:88060201:-@chr5:88054402|88054498:88049814:-	0.88	0.86	0.9	0.76	0.74	0.77	0.12	1000000000000	MEF2C	ENSG00000081189
chr5:923588:923690:-@chr5:922509|922519:922360:-	0.46	0.37	0.55	0.24	0.19	0.29	0.22	55649.3	BRD9	ENSG00000028310
chr5:944270:944402:-@chr5:942762|942881:942702:-	0.47	0.42	0.52	0.2	0.18	0.21	0.27	1000000000000	BRD9	ENSG00000028310
chr6:133097085:133097215:-@chr6:133091765|133091811:133091573:-	0.36	0.3	0.42	0.18	0.14	0.23	0.18	904.79	VNN3	ENSG00000093134
chr6:144331737:144331808:-@chr6:144329028|144329115:144328988:-	0.24	0.16	0.33	0.42	0.37	0.48	-0.18	29.65	PLAGL1	ENSG00000118495
chr6:144331737:144331808:-@chr6:144329042|144329060:144328988:-	0.83	0.74	0.91	0.67	0.62	0.73	0.16	6.69	PLAGL1	ENSG00000118495
chr6:144331737:144331808:-@chr6:144329060|144329115:144328988:-	0.22	0.16	0.27	0.43	0.4	0.47	-0.21	1000000000000	PLAGL1	ENSG00000118495
chr6:26519762:26519788:+@chr6:26520912|26521376:26523423:+	0.4	0.37	0.43	0.26	0.25	0.27	0.14	1000000000000	BTN3A1	ENSG00000026950
chr6:31617706:31617904:-@chr6:31616290|31616420:31616078:-	0.42	0.41	0.44	0.56	0.55	0.57	-0.14	1000000000000	SNORD83	ENSG00000200684
chr6:31662956:31663074:+@chr6:31664253|31664319:31664432:+	0.57	0.55	0.59	0.46	0.45	0.47	0.11	1000000000000	LST1	ENSG00000204482
chr6:31662956:31663074:+@chr6:31664253|31664319:31664665:+	0.6	0.58	0.62	0.46	0.46	0.47	0.14	1000000000000	LST1	ENSG00000204482
chr6:32046668:32046903:-@chr6:32046508|32046581:32046362:-	0.68	0.63	0.74	0.57	0.54	0.59	0.11	78.13	DOM3Z	ENSG00000204348
chr6:33493714:33494043:-@chr6:33493450|33493571:33493236:-	0.23	0.2	0.25	0.4	0.39	0.41	-0.17	1000000000000	CUTA	ENSG00000112514
chr6:41198694:41198966:+@chr6:41199367|41200202:41200537:+	0.22	0.17	0.27	0.09	0.08	0.11	0.13	1.54918e+06	NA	NA
chr6:41665487:41665570:+@chr6:41665679|41665715:41665886:+	0.12	0.06	0.21	0.28	0.25	0.32	-0.16	16.33	FOXP4	ENSG00000137166
chr6:41864948:41865052:+@chr6:41865247|41865284:41865612:+	0.45	0.44	0.47	0.23	0.22	0.23	0.22	1000000000000	TOMM6	ENSG00000214736
chr7:100326726:100326895:-@chr7:100325892|100326645:100325551:-	0.73	0.65	0.81	0.92	0.87	0.96	-0.19	10829.3	ACHE	ENSG00000087085
chr7:104949735:104949921:-@chr7:104936203|104936227:104935798:-	0.85	0.76	0.92	0.58	0.52	0.63	0.27	14906.9	PUS7	ENSG00000091127
chr7:138955687:138955849:-@chr7:138949698|138949779:138949572:-	0.7	0.64	0.75	0.4	0.37	0.43	0.3	1000000000000	HIPK2	ENSG00000064393
chr7:2239033:2239109:-@chr7:2236888|2236925:2236710:-	0.32	0.26	0.4	0.16	0.14	0.19	0.16	431.98	MAD1L1	ENSG00000002822
chr7:26212513:26212655:+@chr7:26214538|26214611:26214700:+	0.73	0.71	0.75	0.63	0.63	0.64	0.1	1000000000000	CBX3	ENSG00000122565
chr7:40094250:40094455:+@chr7:40098909|40099089:40099361:+	0.39	0.36	0.42	0.49	0.47	0.51	-0.1	1.17899e+10	CDC2L5	ENSG00000065883
chr7:44079749:44079832:-@chr7:44079501|44079554:44078374:-	0.53	0.46	0.59	0.38	0.36	0.4	0.15	824584	POLM	ENSG00000122678
chr7:4795989:4796086:+@chr7:4796371|4796616:4796748:+	0.39	0.34	0.44	0.58	0.56	0.6	-0.19	1000000000000	KIAA0415	ENSG00000164917
chr7:5747130:5747801:-@chr7:5745509|5745782:5745433:-	0.16	0.14	0.18	0.34	0.33	0.36	-0.18	1000000000000	RNF216	ENSG00000011275
chr7:5759003:5759136:-@chr7:5747801|5747972:5747130:-	0.3	0.27	0.33	0.48	0.46	0.5	-0.18	1000000000000	RNF216	ENSG00000011275
chr7:6583609:6583654:+@chr7:6584657|6584722:6584876:+	0.25	0.21	0.3	0.12	0.11	0.14	0.13	6.02118e+11	ZDHHC4	ENSG00000136247
chr7:6583624:6583876:+@chr7:6584657|6584722:6584876:+	0.27	0.23	0.31	0.16	0.15	0.17	0.11	40460.4	ZDHHC4	ENSG00000136247
chr7:86648561:86648593:+@chr7:86649269|86649308:86649589:+	0.3	0.25	0.36	0.14	0.13	0.16	0.16	1000000000000	DMTF1	ENSG00000135164
chr7:86653081:86653232:+@chr7:86655291|86655344:86655553:+	0.15	0.13	0.17	0.25	0.23	0.26	-0.1	1000000000000	DMTF1	ENSG00000135164
chr7:98940209:98940292:+@chr7:98941502|98941564:98942017:+	0.94	0.86	0.99	0.67	0.62	0.71	0.27	1000000000000	ZKSCAN5	ENSG00000196652
chr7:99591945:99592108:-@chr7:99591384|99591478:99591230:-	0.18	0.15	0.22	0.3	0.28	0.32	-0.12	7.37268e+06	C7orf43	ENSG00000146826
chr7:99591945:99592108:-@chr7:99591384|99591490:99591230:-	0.19	0.15	0.22	0.31	0.29	0.33	-0.12	1000000000000	C7orf43	ENSG00000146826
chr7:99786811:99786969:+@chr7:99787722|99787821:99788037:+	0.83	0.8	0.85	0.73	0.72	0.74	0.1	1000000000000	PILRB	ENSG00000121716
chr7:99914353:99914838:-@chr7:99913763|99913866:99912836:-	0.96	0.94	0.98	0.86	0.84	0.87	0.1	1000000000000	TSC22D4	ENSG00000166925
chr8:22108920:22109045:+@chr8:22109639|22110138:22110298:+	0.24	0.21	0.28	0.14	0.13	0.15	0.1	816201	BMP1	ENSG00000168487
chr8:38369288:38369670:+@chr8:38370773|38370858:38370916:+	0.15	0.09	0.21	0.37	0.33	0.42	-0.22	7.75394e+11	LETM2	ENSG00000165046
chr8:68286272:68286404:-@chr8:68279512|68279608:68279469:-	0.81	0.75	0.86	0.91	0.88	0.93	-0.1	38.76	ARFGEF1	ENSG00000066777
chr9:101627762:101627935:+@chr9:101629389|101630144:101631096:+	0.34	0.3	0.38	0.22	0.2	0.23	0.12	1000000000000	NR4A3	ENSG00000119508
chr9:105896362:105896579:+@chr9:105897384|105897426:105897654:+	0.37	0.29	0.44	0.14	0.11	0.17	0.23	1000000000000	SMC2	ENSG00000136824
chr9:105896362:105896579:+@chr9:105897401|105897426:105897654:+	0.39	0.32	0.47	0.12	0.09	0.15	0.27	1000000000000	SMC2	ENSG00000136824
chr9:115178830:115179058:-@chr9:115177627|115177668:115177554:-	0.8	0.71	0.89	0.65	0.6	0.69	0.15	8.5	HDHD3	ENSG00000119431
chr9:116419219:116419402:+@chr9:116426237|116426451:116426560:+	0.42	0.35	0.5	0.26	0.23	0.28	0.16	3294.93	C9orf91	ENSG00000157693
chr9:124657284:124657497:-@chr9:124656681|124656715:124656631:-	0.75	0.68	0.81	0.9	0.87	0.92	-0.15	13724.3	RC3H2	ENSG00000056586
chr9:130173419:130173515:+@chr9:130180095|130180136:130180206:+	0.28	0.23	0.33	0.09	0.08	0.1	0.19	1000000000000	URM1	ENSG00000167118
chr9:130523751:130523917:-@chr9:130523580|130523602:130522980:-	0.81	0.78	0.84	0.95	0.94	0.96	-0.14	1000000000000	ZDHHC12	ENSG00000160446
chr9:131727060:131727257:-@chr9:131726039|131726126:131725944:-	0.09	0.06	0.11	0.2	0.19	0.22	-0.11	1000000000000	FNBP1	ENSG00000187239
chr9:131727060:131727257:-@chr9:131726096|131726126:131725944:-	0.12	0.07	0.17	0.33	0.3	0.37	-0.21	1000000000000	FNBP1	ENSG00000187239
chr9:133009488:133009962:+@chr9:133011337|133011370:133011512:+	0.78	0.73	0.83	0.51	0.49	0.54	0.27	1000000000000	NUP214	ENSG00000126883
chr9:134497249:134497299:-@chr9:134495586|134495611:134495472:-	0.93	0.84	0.99	0.66	0.61	0.71	0.27	9.28157e+06	DDX31	ENSG00000125485
chr9:134975504:134975697:-@chr9:134974893|134974929:134974834:-	0.6	0.56	0.64	0.4	0.39	0.42	0.2	1000000000000	RALGDS	ENSG00000160271
chr9:135020386:135020520:-@chr9:135019450|135019469:135018161:-	0.95	0.91	0.99	0.85	0.83	0.87	0.1	30.56	GBGT1	ENSG00000148288
chr9:139038416:139038509:-@chr9:139037325|139038113:139037214:-	0.37	0.29	0.45	0.54	0.5	0.59	-0.17	135.88	ABCA2	ENSG00000107331
chr9:87462170:87462378:-@chr9:87459935|87460055:87459878:-	0.47	0.44	0.49	0.62	0.59	0.64	-0.15	1000000000000	AGTPBP1	ENSG00000135049
chr9:91124387:91124532:+@chr9:91130162|91130283:91130411:+	0.81	0.77	0.84	0.62	0.6	0.64	0.19	1000000000000	SECISBP2	ENSG00000187742
chrX:102727803:102727875:+@chrX:102728233|102728238:102729311:+	0.98	0.97	0.99	0.84	0.83	0.84	0.14	1000000000000	TCEAL4	ENSG00000133142
chrX:102826265:102826313:-@chrX:102820184|102820204:102820083:-	0.59	0.52	0.65	0.71	0.68	0.74	-0.12	24.51	MORF4L2	ENSG00000123562
chrX:102826265:102826313:-@chrX:102820184|102820235:102820083:-	0.69	0.63	0.74	0.79	0.77	0.81	-0.1	28.89	MORF4L2	ENSG00000123562
chrX:102826755:102826844:-@chrX:102820184|102820235:102820083:-	0.32	0.29	0.35	0.43	0.42	0.44	-0.11	1000000000000	MORF4L2	ENSG00000123562
chrX:118029806:118029964:+@chrX:118030871|118031030:118031192:+	0.39	0.3	0.49	0.56	0.5	0.62	-0.17	5.04	LONRF3	ENSG00000175556
chrX:129618236:129618350:-@chrX:129599059|129599065:129598884:-	0.67	0.6	0.73	0.82	0.78	0.85	-0.15	1086.65	ENOX2	ENSG00000165675
chrX:133743517:133743613:-@chrX:133733050|133733979:133731262:-	0.35	0.34	0.37	0.62	0.61	0.63	-0.27	1000000000000	FAM122B	ENSG00000156504
chrX:13679289:13679408:+@chrX:13680744|13681408:13681481:+	0.26	0.24	0.28	0.45	0.44	0.47	-0.19	1000000000000	OFD1	ENSG00000046651
chrX:23768351:23768415:-@chrX:23761548|23761650:23761386:-	0.27	0.22	0.32	0.42	0.4	0.45	-0.15	9.80637e+09	RPL9P7	ENSG00000182754
chrX:48648613:48648764:-@chrX:48647113|48647703:48646967:-	0.7	0.64	0.75	0.53	0.51	0.56	0.17	2.38107e+10	SLC35A2	ENSG00000102100
chrX:69426435:69426523:-@chrX:69425929|69426168:69425830:-	0.22	0.18	0.27	0.11	0.1	0.12	0.11	1.91121e+06	PDZD11	ENSG00000120509
chrX:70755013:70755092:-@chrX:70754034|70754278:70752491:-	0.07	0.04	0.13	0.2	0.16	0.24	-0.13	26.61	CXCR3	ENSG00000186810
chrX:84387565:84387684:+@chrX:84388592|84389209:84389313:+	0.8	0.73	0.86	0.62	0.59	0.66	0.18	52507.7	ZNF711	ENSG00000147180
chrY:13976277:13976672:-@chrY:13957074|13957609:13956837:-	0.95	0.91	0.98	0.83	0.8	0.85	0.12	5.62511e+11	UTY	ENSG00000183878
chrY:20208484:20208781:+@chrY:20209644|20210795:20210886:+	0.12	0.11	0.13	0.25	0.24	0.26	-0.13	1000000000000	CYorf15A	ENSG00000099749
event_name(A5SS)	Q157P_posterior_mean	sample1_ci_low	sample1_ci_high	wt_posterior_mean	sample2_ci_low	sample2_ci_high	diff	bayes_factor	proposed_gname	proposed_gname
chr1:101313420:101313538|101313860:+@chr1:101315507:101315652:+	0.96	0.91	0.99	0.82	0.78	0.85	0.14	1470.78	NA	NA
chr1:115124831:115124531|115124581:-@chr1:115124254:115124359:-	0.49	0.4	0.58	0.35	0.31	0.39	0.14	5.37	RP5-1000E10.4	ENSG00000052723
chr1:146713672:146713513|146713518:-@chr1:146713206:146713415:-	0.24	0.19	0.3	0.51	0.48	0.54	-0.27	1000000000000	NBPF10	ENSG00000203832
chr1:149505104:149505212|149505221:+@chr1:149505408:149505539:+	0.98	0.94	1	0.63	0.59	0.66	0.35	1000000000000	PSMD4	ENSG00000159352
chr1:153241730:153241769|153241786:+@chr1:153241943:153242043:+	0.76	0.68	0.83	0.89	0.86	0.92	-0.13	14.95	ZBTB7B	ENSG00000160685
chr1:154521599:154521682|154522398:+@chr1:154522675:154522888:+	0.72	0.62	0.82	0.94	0.9	0.97	-0.22	14820.4	TMEM79	ENSG00000163472
chr1:1548632:1548725|1548942:+@chr1:1549017:1549188:+	0.73	0.67	0.79	0.6	0.57	0.64	0.13	19.21	MIB2	ENSG00000197530
chr1:159060595:159060663|159060666:+@chr1:159064162:159064669:+	0.06	0.03	0.09	0.17	0.13	0.22	-0.11	361.21	LY9	ENSG00000122224
chr1:161558347:161558480|161558626:+@chr1:161562446:161562588:+	0.64	0.58	0.7	0.54	0.5	0.57	0.1	5.01	NUF2	ENSG00000143228
chr1:173240373:173240573|173240592:+@chr1:173242504:173242600:+	0.89	0.85	0.92	0.79	0.77	0.81	0.1	1.09602e+07	CACYBP	ENSG00000116161
chr1:178432020:178432357|178432648:+@chr1:178433091:178433792:+	0.54	0.53	0.56	0.66	0.65	0.67	-0.12	1000000000000	QSOX1	ENSG00000116260
chr1:203740350:203740547|203740629:+@chr1:203758898:203759048:+	0.11	0.07	0.17	0.22	0.18	0.26	-0.11	7.25	PCTK3	ENSG00000117266
chr1:203759234:203759376|203759466:+@chr1:203759983:203760108:+	0.31	0.23	0.41	0.13	0.11	0.16	0.18	216.83	PCTK3	ENSG00000117266
chr1:205576661:205576786|205577218:+@chr1:205577297:205577377:+	0.26	0.25	0.27	0.07	0.07	0.07	0.19	1000000000000	CD55	ENSG00000196352
chr1:226363636:226363473|226363585:-@chr1:226362559:226362642:-	0.66	0.56	0.77	0.85	0.81	0.88	-0.19	19.02	MRPL55	ENSG00000162910
chr1:28707929:28708000|28708004:+@chr1:28715824:28715966:+	0.85	0.78	0.9	0.96	0.95	0.97	-0.11	22857.8	RCC1	ENSG00000180198
chr1:32574427:32574135|32574360:-@chr1:32572017:32573285:-	0.56	0.52	0.59	0.45	0.43	0.46	0.11	1000000000000	MARCKSL1	ENSG00000175130
chr1:38170312:38169932|38170172:-@chr1:38129617:38129713:-	0.26	0.21	0.31	0.39	0.36	0.42	-0.13	73783.8	INPP5B	ENSG00000204084
chr1:39977117:39977182|39977190:+@chr1:39978424:39978522:+	0.62	0.57	0.67	0.73	0.71	0.75	-0.11	159.46	PPIE	ENSG00000084072
chr1:45859092:45858787|45858982:-@chr1:45858303:45858692:-	0.7	0.65	0.74	0.57	0.51	0.61	0.13	1040.32	CCDC17	ENSG00000159588
chr1:46579437:46579756|46580124:+@chr1:46583060:46583403:+	0.4	0.35	0.45	0.27	0.25	0.29	0.13	611091	AL122001.32-3	ENSG00000215890
chr1:95482355:95482795|95482859:+@chr1:95484686:95484801:+	0.84	0.76	0.91	0.64	0.6	0.69	0.2	57.38	RWDD3	ENSG00000122481
chr1:95482355:95482842|95482859:+@chr1:95484686:95484801:+	0.51	0.42	0.6	0.28	0.24	0.31	0.23	2.81321e+06	RWDD3	ENSG00000122481
chr10:102736722:102736434|102736496:-@chr10:102736017:102736319:-	0.65	0.58	0.71	0.97	0.96	0.98	-0.32	1000000000000	MRPL43	ENSG00000055950
chr10:102740616:102740757|102740801:+@chr10:102742937:102744148:+	0.22	0.16	0.28	0.12	0.1	0.14	0.1	21.42	PEO1	ENSG00000107815
chr10:27052949:27053058|27053062:+@chr10:27064175:27064255:+	0.48	0.4	0.56	0.32	0.28	0.35	0.16	345.94	PDSS1	ENSG00000148459
chr10:45455417:45455205|45455270:-@chr10:45441405:45442559:-	0.48	0.41	0.57	0.35	0.32	0.39	0.13	5.68	ANUBL1	ENSG00000172671
chr10:50045060:50044496|50044920:-@chr10:50043817:50043847:-	0.26	0.21	0.31	0.15	0.14	0.16	0.11	65249.5	C10orf128	ENSG00000204161
chr10:71576502:71575183|71576415:-@chr10:71567739:71569903:-	0.42	0.37	0.47	0.3	0.28	0.31	0.12	990158	TYSND1	ENSG00000156521
chr10:76405163:76405545|76406094:+@chr10:76407080:76407201:+	0.45	0.41	0.49	0.6	0.58	0.62	-0.15	1000000000000	MYST4	ENSG00000156650
chr10:99486868:99487068|99487072:+@chr10:99488224:99488421:+	0.31	0.24	0.37	0.2	0.18	0.22	0.11	9.69	ZFYVE27	ENSG00000155256
chr10:99488224:99488396|99488421:+@chr10:99492841:99492911:+	0.96	0.93	0.98	0.85	0.83	0.87	0.11	1000000000000	ZFYVE27	ENSG00000155256
chr11:116575250:116575358|116575755:+@chr11:116578928:116579119:+	0.76	0.66	0.86	0.97	0.94	0.99	-0.21	3.46669e+06	TAGLN	ENSG00000149591
chr11:117574016:117573893|117573923:-@chr11:117572660:117572746:-	0.35	0.32	0.39	0.2	0.19	0.21	0.15	1000000000000	AMICA1	ENSG00000160593
chr11:125584827:125584596|125584626:-@chr11:125580793:125580886:-	0.35	0.29	0.41	0.18	0.16	0.19	0.17	9.58935e+07	RPUSD4	ENSG00000165526
chr11:18300297:18300069|18300256:-@chr11:18295874:18296030:-	0.82	0.72	0.92	0.96	0.93	0.98	-0.14	5.31	HPS5	ENSG00000110756
chr11:34894253:34894609|34894938:+@chr11:34909527:34909607:+	0.8	0.73	0.87	0.95	0.92	0.97	-0.15	228.08	PDHX	ENSG00000110435
chr11:47263068:47263192|47263321:+@chr11:47263578:47263717:+	0.27	0.24	0.3	0.37	0.36	0.39	-0.1	1000000000000	MADD	ENSG00000110514
chr11:47273623:47273694|47273703:+@chr11:47274024:47274182:+	0.64	0.57	0.71	0.5	0.46	0.53	0.14	59.01	MADD	ENSG00000110514
chr11:47791175:47790995|47791010:-@chr11:47790430:47790557:-	0.21	0.17	0.24	0.11	0.09	0.12	0.1	1.16656e+08	NUP160	ENSG00000030066
chr11:61669677:61669799|61669811:+@chr11:61670706:61670950:+	0.39	0.34	0.44	0.27	0.24	0.3	0.12	3301.29	INCENP	ENSG00000149503
chr11:63878052:63878076|63878218:+@chr11:63879242:63879448:+	0.82	0.79	0.85	0.7	0.68	0.73	0.12	1000000000000	CCDC88B	ENSG00000168071
chr11:65962886:65962679|65962757:-@chr11:65962211:65962306:-	0.65	0.62	0.69	0.79	0.77	0.8	-0.14	1000000000000	MRPL11	ENSG00000174547
chr11:76600514:76600624|76600630:+@chr11:76601645:76601728:+	0.97	0.91	1	0.86	0.8	0.91	0.11	5.28	MYO7A	ENSG00000137474
chr11:82587169:82587248|82587332:+@chr11:82594748:82594855:+	0.45	0.39	0.53	0.6	0.56	0.64	-0.15	20.99	ANKRD42	ENSG00000137494
chr12:109046565:109046631|109047049:+@chr12:109049548:109049712:+	0.25	0.18	0.31	0.39	0.35	0.43	-0.14	41.06	IFT81	ENSG00000122970
chr12:111186399:111186271|111186277:-@chr12:111183492:111183616:-	0.7	0.63	0.76	0.55	0.51	0.58	0.15	75.99	C12orf51	ENSG00000173064
chr12:120977094:120977215|120977278:+@chr12:120981381:120984333:+	0.48	0.39	0.57	0.31	0.29	0.33	0.17	278.91	BCL7A	ENSG00000110987
chr12:123378132:123377908|123378046:-@chr12:123376690:123376869:-	0.31	0.28	0.34	0.42	0.41	0.44	-0.11	1000000000000	NCOR2	ENSG00000196498
chr12:31349324:31349183|31349187:-@chr12:31342278:31342425:-	0.41	0.37	0.45	0.28	0.26	0.3	0.13	1000000000000	FAM60A	ENSG00000139146
chr12:44949475:44948576|44948915:-@chr12:44923250:44923364:-	0.69	0.67	0.72	0.79	0.78	0.81	-0.1	1000000000000	SLC38A1	ENSG00000111371
chr12:49982831:49982071|49982737:-@chr12:49979658:49979765:-	0.79	0.76	0.82	0.93	0.92	0.94	-0.14	1000000000000	BIN2	ENSG00000110934
chr12:50691090:50691192|50691258:+@chr12:50693738:50693831:+	0.38	0.32	0.44	0.28	0.27	0.29	0.1	140.25	GRASP	ENSG00000161835
chr12:51851492:51851324|51851377:-@chr12:51850474:51850553:-	0.33	0.25	0.4	0.21	0.18	0.24	0.12	6.75	CSAD	ENSG00000139631
chr12:51948806:51948898|51948979:+@chr12:51949075:51950136:+	0.43	0.35	0.51	0.13	0.1	0.17	0.3	1000000000000	ESPL1	ENSG00000135476
chr12:54844782:54844354|54844699:-@chr12:54843394:54843816:-	0.96	0.93	0.98	0.86	0.84	0.88	0.1	8.81544e+08	SMARCC2	ENSG00000139613
chr12:6793569:6793705|6793890:+@chr12:6794186:6794419:+	0.25	0.2	0.29	0.36	0.34	0.38	-0.11	54.58	CD4	ENSG00000010610
chr12:92489588:92489821|92490093:+@chr12:92490592:92490943:+	0.31	0.29	0.33	0.07	0.06	0.07	0.24	1000000000000	SOCS2	ENSG00000120833
chr12:9731765:9731949|9732024:+@chr12:9736691:9736794:+	0.27	0.23	0.31	0.14	0.12	0.15	0.13	1000000000000	AC007068.17	ENSG00000214774
chr12:9731765:9731949|9732024:+@chr12:9738623:9743306:+	0.31	0.25	0.37	0.09	0.07	0.16	0.22	1000000000000	AC007068.17	ENSG00000214774
chr12:97513342:97513466|97513570:+@chr12:97515765:97515944:+	0.74	0.71	0.78	0.53	0.52	0.54	0.21	1000000000000	SLC25A3	ENSG00000075415
chr13:38510448:38510602|38510860:+@chr13:38511273:38511425:+	0.94	0.9	0.97	0.82	0.8	0.84	0.12	440.09	NHLRC3	ENSG00000188811
chr14:103215474:103215608|103215635:+@chr14:103236745:103236817:+	0.71	0.66	0.76	0.6	0.58	0.62	0.11	40.66	KLC1	ENSG00000126214
chr14:19882931:19883086|19883125:+@chr14:19883393:19883463:+	0.79	0.74	0.82	0.37	0.35	0.4	0.42	1000000000000	PARP2	ENSG00000129484
chr14:23095038:23095392|23096083:+@chr14:23097744:23098630:+	0.43	0.4	0.46	0.53	0.51	0.54	-0.1	1000000000000	THTPA	ENSG00000157306
chr14:23095038:23095392|23096088:+@chr14:23097744:23098630:+	0.43	0.39	0.46	0.53	0.51	0.54	-0.1	1.54171e+06	THTPA	ENSG00000157306
chr14:23095038:23095392|23096353:+@chr14:23097744:23098630:+	0.51	0.47	0.54	0.61	0.59	0.62	-0.1	1000000000000	THTPA	ENSG00000157306
chr14:23493232:23492623|23492823:-@chr14:23477780:23480207:-	0.36	0.31	0.41	0.58	0.56	0.61	-0.22	1000000000000	AL136419.3-2	ENSG00000215256
chr14:76993736:76993191|76993591:-@chr14:76990106:76990198:-	0.32	0.27	0.38	0.17	0.16	0.19	0.15	1.37274e+09	C14orf133	ENSG00000151445
chr15:100323796:100323949|100323953:+@chr15:100330319:100330420:+	0.61	0.53	0.68	0.75	0.72	0.78	-0.14	13.13	FAM39B	ENSG00000185596
chr15:100330627:100330773|100331078:+@chr15:100331318:100331453:+	0.72	0.69	0.76	0.59	0.57	0.6	0.13	1000000000000	FAM39B	ENSG00000185596
chr15:26794093:26794214|26794219:+@chr15:26795675:26795861:+	0.95	0.89	0.99	0.67	0.6	0.74	0.28	1000000000000	NA	NA
chr15:46410913:46410968|46411284:+@chr15:46411757:46411895:+	0.59	0.56	0.62	0.75	0.73	0.76	-0.16	1000000000000	DUT	ENSG00000128951
chr15:65601236:65600886|65600911:-@chr15:65598392:65598494:-	0.79	0.69	0.87	0.62	0.58	0.66	0.17	9.23	NA	NA
chr15:65601236:65600886|65600938:-@chr15:65598392:65598494:-	0.84	0.77	0.9	0.66	0.63	0.69	0.18	119459	NA	NA
chr15:72699403:72699619|72701610:+@chr15:72701888:72701954:+	0.43	0.41	0.46	0.33	0.32	0.34	0.1	1000000000000	CLK3	ENSG00000179335
chr15:89313857:89313681|89313758:-@chr15:89310272:89311436:-	0.77	0.73	0.81	0.67	0.64	0.69	0.1	9751.9	PRC1	ENSG00000198901
chr16:1360359:1359936|1360132:-@chr16:1357658:1357860:-	0.24	0.18	0.29	0.35	0.32	0.39	-0.11	9.6	C16orf28	ENSG00000059145
chr16:1733334:1733478|1735105:+@chr16:1737031:1737277:+	0.83	0.8	0.85	0.68	0.67	0.69	0.15	1000000000000	MAPK8IP3	ENSG00000138834
chr16:2662572:2659413|2661597:-@chr16:2651152:2653409:-	0.71	0.68	0.75	0.85	0.83	0.87	-0.14	1000000000000	NA	NA
chr16:27383658:27383142|27383217:-@chr16:27382363:27382414:-	0.45	0.39	0.52	0.63	0.6	0.66	-0.18	1.20596e+07	GTF3C1	ENSG00000077235
chr16:2810957:2811069|2811111:+@chr16:2811368:2811724:+	0.88	0.87	0.9	0.75	0.73	0.77	0.13	1000000000000	PRSS21	ENSG00000007038
chr16:30847289:30847321|30847450:+@chr16:30848895:30849406:+	0.46	0.41	0.51	0.58	0.56	0.6	-0.12	72.93	FBXL19	ENSG00000099364
chr16:3225410:3224637|3225113:-@chr16:3223507:3223837:-	0.32	0.24	0.41	0.48	0.43	0.54	-0.16	8.29	ZNF200	ENSG00000010539
chr16:49334174:49334234|49334253:+@chr16:49340961:49341614:+	0.44	0.35	0.55	0.21	0.18	0.24	0.23	4.94821e+07	CYLD	ENSG00000083799
chr16:68822927:68822731|68822841:-@chr16:68822398:68822562:-	0.79	0.72	0.86	0.52	0.49	0.56	0.27	1000000000000	AC009060.7-2	ENSG00000205152
chr16:711802:711942|712084:+@chr16:712310:712591:+	0.34	0.24	0.45	0.16	0.15	0.18	0.18	110.05	FAM173A	ENSG00000103254
chr17:17661955:17661587|17661735:-@chr17:17661295:17661496:-	0.17	0.15	0.2	0.28	0.27	0.3	-0.11	1000000000000	SREBF1	ENSG00000072310
chr17:19231125:19230947|19231056:-@chr17:19230666:19230744:-	0.08	0.03	0.15	0.26	0.16	0.4	-0.18	21.89	MFAP4	ENSG00000166482
chr17:37967618:37967763|37968031:+@chr17:37968156:37968866:+	0.54	0.51	0.58	0.64	0.63	0.66	-0.1	17883.7	COASY	ENSG00000068120
chr17:37979754:37979363|37979643:-@chr17:37979022:37979167:-	0.34	0.29	0.39	0.23	0.21	0.25	0.11	404.84	PSMC3IP	ENSG00000131470
chr17:72234507:72234855|72235034:+@chr17:72240655:72240892:+	0.32	0.28	0.37	0.21	0.2	0.23	0.11	2941.25	C17orf95	ENSG00000181038
chr17:72234507:72234890|72235034:+@chr17:72240655:72240892:+	0.28	0.23	0.33	0.17	0.16	0.19	0.11	937.31	C17orf95	ENSG00000181038
chr18:75347236:75347618|75347925:+@chr18:75388516:75390311:+	0.43	0.35	0.53	0.26	0.24	0.29	0.17	1309.88	NFATC1	ENSG00000131196
chr19:18543614:18543697|18543719:+@chr19:18545103:18545213:+	0.4	0.39	0.41	0.53	0.52	0.53	-0.13	1000000000000	UBA52	ENSG00000221983
chr19:45539637:45539533|45539586:-@chr19:45534067:45534154:-	0.22	0.16	0.28	0.11	0.08	0.13	0.11	80.04	Y_RNA	ENSG00000207281
chr19:45941720:45941650|45941660:-@chr19:45938601:45940515:-	0.93	0.88	0.97	0.79	0.75	0.83	0.14	1711.21	C19orf54	ENSG00000188493
chr19:51912224:51911912|51912048:-@chr19:51911228:51911632:-	0.54	0.49	0.59	0.75	0.73	0.77	-0.21	1000000000000	PRKD2	ENSG00000105287
chr19:51943612:51943762|51943814:+@chr19:51950509:51953582:+	0.33	0.26	0.41	0.17	0.15	0.19	0.16	22865.6	FKRP	ENSG00000181027
chr19:51943612:51943762|51943981:+@chr19:51950509:51953582:+	0.32	0.27	0.38	0.22	0.2	0.24	0.1	80.73	FKRP	ENSG00000181027
chr19:55072456:55071672|55072094:-@chr19:55067986:55068371:-	0.51	0.45	0.57	0.63	0.6	0.66	-0.12	15.39	AKT1S1	ENSG00000204673
chr19:55072456:55071672|55072306:-@chr19:55067986:55068371:-	0.72	0.66	0.78	0.94	0.92	0.95	-0.22	1000000000000	AKT1S1	ENSG00000204673
chr19:55072456:55072094|55072306:-@chr19:55067986:55068371:-	0.84	0.79	0.9	0.96	0.94	0.97	-0.12	3354.68	AKT1S1	ENSG00000204673
chr19:60193202:60193372|60193573:+@chr19:60193682:60193852:+	0.71	0.64	0.79	0.5	0.45	0.56	0.21	797271	NLRP2	ENSG00000022556
chr2:111597781:111597917|111598187:+@chr2:111638181:111642493:+	0.97	0.9	1	0.65	0.62	0.68	0.32	1000000000000	BCL2L11	ENSG00000153094
chr2:120389225:120389288|120390736:+@chr2:120394115:120394287:+	0.12	0.1	0.15	0.26	0.23	0.28	-0.14	1000000000000	AC092455.4-2	ENSG00000208539
chr2:152393255:152392891|152393149:-@chr2:152379899:152379959:-	0.92	0.86	0.97	0.8	0.77	0.84	0.12	8.97	ARL5A	ENSG00000162980
chr2:192251107:192251212|192251676:+@chr2:192251961:192252099:+	0.56	0.52	0.6	0.38	0.36	0.39	0.18	1000000000000	OBFC2A	ENSG00000173559
chr2:201849795:201849936|201850072:+@chr2:201857784:201858285:+	0.79	0.78	0.8	0.67	0.66	0.68	0.12	1000000000000	CASP8	ENSG00000064012
chr2:218007084:218006725|218006916:-@chr2:218005891:218005989:-	0.14	0.07	0.23	0.33	0.24	0.44	-0.19	5.2	NA	NA
chr2:238763352:238763233|238763243:-@chr2:238761511:238761637:-	0.82	0.79	0.86	0.71	0.7	0.73	0.11	15157308	ILKAP	ENSG00000132323
chr2:58279301:58279218|58279233:-@chr2:58246363:58246513:-	0.06	0.02	0.11	0.23	0.21	0.26	-0.17	7.79428e+09	FANCL	ENSG00000115392
chr2:85436189:85436350|85436530:+@chr2:85437601:85437886:+	0.69	0.6	0.8	0.52	0.49	0.56	0.17	15.83	ELMOD3	ENSG00000115459
chr20:2584580:2584680|2584860:+@chr20:2585047:2585195:+	0.39	0.37	0.41	0.29	0.28	0.29	0.1	1000000000000	SNORD86	ENSG00000212498
chr20:3399665:3399781|3400164:+@chr20:3463900:3463983:+	0.99	0.95	1	0.88	0.84	0.91	0.11	60.94	ATRN	ENSG00000088812
chr20:3749171:3749349|3749501:+@chr20:3750749:3750940:+	0.58	0.48	0.68	0.42	0.38	0.46	0.16	5.98	C20orf29	ENSG00000125843
chr20:5041733:5041376|5041607:-@chr20:5037978:5038091:-	0.89	0.81	0.97	0.72	0.69	0.75	0.17	291.11	C20orf30	ENSG00000089063
chr20:5041733:5041389|5041607:-@chr20:5037978:5038091:-	0.8	0.71	0.89	0.66	0.62	0.69	0.14	5.48	C20orf30	ENSG00000089063
chr20:56659734:56660549|56660600:+@chr20:56668085:56668096:+	0.35	0.3	0.39	0.23	0.22	0.25	0.12	2.20944e+10	STX16	ENSG00000124222
chr20:61028348:61028229|61028236:-@chr20:61016007:61016203:-	0.71	0.65	0.77	0.82	0.8	0.84	-0.11	83.29	DIDO1	ENSG00000101191
chr21:45171968:45172006|45172010:+@chr21:45172197:45174023:+	0.98	0.94	1	0.88	0.81	0.92	0.1	2.14312e+10	NA	NA
chr21:45466361:45466450|45466623:+@chr21:45469890:45470902:+	0.59	0.49	0.68	0.41	0.38	0.44	0.18	27.3	ADARB1	ENSG00000197381
chr21:45466361:45466450|45467920:+@chr21:45469890:45470902:+	0.53	0.49	0.58	0.41	0.4	0.42	0.12	284384	ADARB1	ENSG00000197381
chr21:45466361:45466623|45467920:+@chr21:45469890:45470902:+	0.56	0.51	0.62	0.46	0.45	0.48	0.1	50.11	ADARB1	ENSG00000197381
chr22:18766675:18766507|18766517:-@chr22:18765726:18765815:-	0.03	0	0.1	0.2	0.19	0.22	-0.17	184.36	PI4KAP1	ENSG00000215513
chr22:26723399:26723727|26724826:+@chr22:26725418:26728667:+	0.96	0.91	0.99	0.85	0.82	0.89	0.11	14.03	NA	NA
chr22:36783208:36783389|36783442:+@chr22:36783706:36783803:+	0.23	0.19	0.28	0.35	0.32	0.37	-0.12	42.4	PICK1	ENSG00000100151
chr3:101910850:101910965|101911255:+@chr3:101915177:101915403:+	0.4	0.36	0.45	0.29	0.27	0.3	0.11	8.54434e+11	TFG	ENSG00000114354
chr3:123921792:123921925|123923190:+@chr3:123929349:123929523:+	0.54	0.51	0.56	0.22	0.21	0.22	0.32	1000000000000	PARP14	ENSG00000173193
chr3:125939105:125939776|125939980:+@chr3:125941561:125941736:+	0.5	0.45	0.55	0.29	0.28	0.31	0.21	1000000000000	UMPS	ENSG00000114491
chr3:188006984:188006773|188006908:-@chr3:188005066:188005207:-	0.5	0.46	0.54	0.61	0.59	0.63	-0.11	4.03209e+07	RFC4	ENSG00000163918
chr3:20191551:20190745|20191501:-@chr3:20187539:20187728:-	0.98	0.92	1	0.8	0.75	0.85	0.18	1246.87	SGOL1	ENSG00000129810
chr4:14618027:14618308|14618317:+@chr4:14627910:14628000:+	0.14	0.11	0.17	0.24	0.22	0.27	-0.1	2183.34	CPEB2	ENSG00000137449
chr4:146779677:146780180|146780468:+@chr4:146782965:146783087:+	0.26	0.21	0.32	0.16	0.14	0.18	0.1	11.96	MMAA	ENSG00000151611
chr4:1913864:1913957|1914090:+@chr4:1922597:1922728:+	0.3	0.24	0.37	0.57	0.5	0.64	-0.27	1.99215e+06	WHSC1	ENSG00000109685
chr4:20311134:20311332|20311508:+@chr4:20315187:20315254:+	0.92	0.82	0.98	0.76	0.71	0.81	0.16	5.71	PACRGL	ENSG00000163138
chr4:2666471:2666607|2666667:+@chr4:2667888:2668118:+	0.84	0.78	0.9	0.72	0.68	0.76	0.12	10.28	C4orf8	ENSG00000125386
chr4:48548580:48548749|48548794:+@chr4:48557499:48558591:+	0.44	0.38	0.49	0.34	0.32	0.37	0.1	5.56	OCIAD1	ENSG00000109180
chr4:57382665:57382381|57382426:-@chr4:57381459:57381502:-	0.48	0.43	0.54	0.6	0.59	0.62	-0.12	333.22	SPINK2	ENSG00000128040
chr4:84125053:84124338|84125001:-@chr4:84119060:84119183:-	0.69	0.63	0.74	0.58	0.54	0.61	0.11	18.82	LIN54	ENSG00000189308
chr5:149809512:149809242|149809248:-@chr5:149807341:149807491:-	0.58	0.53	0.63	0.39	0.37	0.41	0.19	1000000000000	AC011388.7	ENSG00000178672
chr5:180163508:180163208|180163419:-@chr5:180150147:180152703:-	0.29	0.27	0.32	0.46	0.45	0.47	-0.17	1000000000000	MGAT1	ENSG00000131446
chr5:7922217:7922302|7922328:+@chr5:7923883:7924036:+	0.71	0.62	0.79	0.85	0.81	0.88	-0.14	17.59	MTRR	ENSG00000124275
chr5:7926486:7926625|7926639:+@chr5:7928371:7928488:+	0.89	0.85	0.94	0.99	0.98	0.99	-0.1	7.64934e+06	MTRR	ENSG00000124275
chr5:80633158:80633245|80633273:+@chr5:80636316:80636716:+	0.21	0.15	0.29	0.34	0.3	0.37	-0.13	6.08	ZCCHC9	ENSG00000131732
chr6:151799382:151799248|151799274:-@chr6:151795983:151796058:-	0.19	0.13	0.25	0.09	0.08	0.11	0.1	13.39	RMND1	ENSG00000155906
chr6:170509239:170509331|170509433:+@chr6:170539300:170539506:+	0.46	0.39	0.53	0.26	0.24	0.29	0.2	6.74446e+11	FAM120B	ENSG00000112584
chr6:30722795:30723059|30723602:+@chr6:30725314:30725715:+	0.42	0.37	0.48	0.3	0.29	0.32	0.12	10476.8	C6orf136	ENSG00000204564
chr6:30748809:30748391|30748712:-@chr6:30746792:30747030:-	0.89	0.81	0.95	0.73	0.7	0.76	0.16	40.91	DHX16	ENSG00000204560
chr6:32630726:32630374|32630445:-@chr6:32629611:32629721:-	0.33	0.26	0.41	0.2	0.17	0.23	0.13	25.29	NA	NA
chr6:32969931:32970682|32970781:+@chr6:32976675:32979513:+	0.34	0.28	0.4	0.45	0.42	0.48	-0.11	15.28	HLA-Z	ENSG00000219385
chr6:33494043:33493624|33493714:-@chr6:33493236:33493450:-	0.25	0.23	0.28	0.36	0.35	0.37	-0.11	1000000000000	CUTA	ENSG00000112514
chr6:34324882:34324482|34324734:-@chr6:34323436:34323619:-	0.3	0.25	0.36	0.2	0.19	0.21	0.1	167.48	C6orf1	ENSG00000186577
chr6:41214325:41214442|41215053:+@chr6:41215426:41215495:+	0.43	0.33	0.56	0.21	0.18	0.24	0.22	5621.97	AL133404.8	ENSG00000161912
chr6:42339284:42338976|42339036:-@chr6:42335055:42335439:-	0.14	0.08	0.21	0.29	0.25	0.35	-0.15	49.89	TRERF1	ENSG00000124496
chr6:42956577:42956682|42956798:+@chr6:42959167:42959330:+	0.33	0.29	0.36	0.43	0.41	0.45	-0.1	1.39129e+08	RPL7L1	ENSG00000146223
chr6:86403793:86403680|86403706:-@chr6:86403404:86403580:-	0.65	0.58	0.73	0.47	0.44	0.5	0.18	296431	SYNCRIP	ENSG00000135316
chr6:88274857:88274903|88275033:+@chr6:88275478:88275612:+	0.43	0.38	0.49	0.53	0.5	0.56	-0.1	11.98	SLC35A1	ENSG00000164414
chr7:102176635:102177100|102177341:+@chr7:102179375:102179484:+	0.37	0.3	0.45	0.51	0.47	0.54	-0.14	6.37	FAM185A	ENSG00000222011
chr7:106991638:106991740|106991890:+@chr7:106992269:106992357:+	0.8	0.7	0.88	0.58	0.52	0.63	0.22	2058.82	DUS4L	ENSG00000105865
chr7:106991638:106991740|106991928:+@chr7:106992269:106992357:+	0.76	0.66	0.84	0.51	0.46	0.57	0.25	4564.21	DUS4L	ENSG00000105865
chr7:132310586:132310454|132310469:-@chr7:132220962:132221045:-	0.18	0.11	0.25	0.06	0.04	0.08	0.12	18.58	CHCHD3	ENSG00000106554
chr7:150408814:150408229|150408705:-@chr7:150406862:150407041:-	0.73	0.65	0.81	0.54	0.51	0.56	0.19	10884	FASTK	ENSG00000164896
chr7:2409721:2409820|2409834:+@chr7:2438724:2440742:+	0.01	0	0.06	0.11	0.08	0.14	-0.1	5.57063e+07	CHST12	ENSG00000136213
chr7:43637906:43637136|43637308:-@chr7:43614622:43615765:-	0.55	0.48	0.63	0.76	0.71	0.81	-0.21	178456	NA	NA
chr7:44084935:44084864|44084880:-@chr7:44082633:44082753:-	0.89	0.79	0.96	0.63	0.58	0.68	0.26	6.47412e+10	POLM	ENSG00000122678
chr7:5235765:5235862|5235895:+@chr7:5236992:5240012:+	0.67	0.64	0.7	0.55	0.54	0.56	0.12	1000000000000	WIPI2	ENSG00000157954
chr7:72755248:72754996|72755111:-@chr7:72752995:72753197:-	0.29	0.22	0.36	0.14	0.11	0.18	0.15	37.92	STX1A	ENSG00000106089
chr7:74882806:74882984|74882992:+@chr7:74883195:74883405:+	0.27	0.2	0.35	0.41	0.38	0.43	-0.14	5.89	NSUN5B	ENSG00000183519
chr8:145553033:145553251|145553368:+@chr8:145553652:145553891:+	0.98	0.94	1	0.87	0.83	0.91	0.11	45.31	GPR172A	ENSG00000185803
chr8:41638616:41638476|41638551:-@chr8:41629901:41632429:-	0.81	0.76	0.86	0.71	0.67	0.75	0.1	6.16	ANK1	ENSG00000029534
chr8:57016968:57017041|57017104:+@chr8:57021561:57021606:+	0.65	0.6	0.69	0.42	0.4	0.43	0.23	1000000000000	LYN	ENSG00000147507
chr9:100538726:100538105|100538599:-@chr9:100534116:100534656:-	0.89	0.81	0.96	0.59	0.55	0.64	0.3	1000000000000	ANKS6	ENSG00000165138
chr9:100538726:100538105|100538630:-@chr9:100534116:100534656:-	0.83	0.75	0.89	0.62	0.57	0.67	0.21	1.27492e+06	ANKS6	ENSG00000165138
chr9:133375111:133375204|133375270:+@chr9:133375468:133375623:+	0.59	0.52	0.67	0.34	0.31	0.37	0.25	1000000000000	POMT1	ENSG00000130714
chr9:133376545:133376675|133376680:+@chr9:133377249:133377344:+	0.25	0.2	0.3	0.15	0.13	0.17	0.1	546.64	POMT1	ENSG00000130714
chr9:135204793:135204598|135204618:-@chr9:135203216:135203376:-	0.96	0.91	0.99	0.86	0.81	0.9	0.1	6.81	MED22	ENSG00000148297
chr9:138956739:138956028|138956373:-@chr9:138955810:138955957:-	0.34	0.32	0.37	0.47	0.45	0.48	-0.13	1000000000000	FBXW5	ENSG00000159069
chr9:139579427:139579166|139579358:-@chr9:139578707:139578879:-	0.26	0.22	0.3	0.39	0.37	0.41	-0.13	1000000000000	WDR85	ENSG00000148399
chr9:34637086:34637255|34637958:+@chr9:34638112:34638168:+	0.42	0.36	0.49	0.6	0.56	0.63	-0.18	3.36763e+08	GALT	ENSG00000213930
chr9:68116305:68116503|68116799:+@chr9:68117277:68117458:+	0.81	0.76	0.85	0.69	0.67	0.7	0.12	1.45249e+07	RP11-391M20.1	ENSG00000220533
chr9:88159222:88159006|88159116:-@chr9:88157415:88157965:-	0.75	0.7	0.8	0.85	0.83	0.87	-0.1	63.88	ZCCHC6	ENSG00000083223
chr9:89530794:89530984|89531043:+@chr9:89532329:89532464:+	0.97	0.93	1	0.82	0.78	0.85	0.15	2.41388e+06	CTSL1	ENSG00000135047
chr9:89530794:89530984|89531133:+@chr9:89532329:89532464:+	0.95	0.85	1	0.77	0.74	0.81	0.18	11.5	CTSL1	ENSG00000135047
chr9:99280542:99280676|99280738:+@chr9:99282931:99283041:+	0.32	0.26	0.39	0.22	0.19	0.24	0.1	9.31	TDRD7	ENSG00000196116
chr9:99429715:99429409|99429501:-@chr9:99427784:99428100:-	0.4	0.34	0.46	0.28	0.25	0.31	0.12	25.58	C9orf97	ENSG00000136925
chrX:148431470:148431517|148431536:+@chrX:148434819:148434951:+	0.05	0.02	0.09	0.17	0.15	0.2	-0.12	1.68766e+07	AC016940.7	ENSG00000197620
chrX:153294738:153294783|153294889:+@chrX:153295013:153295098:+	0.07	0.06	0.09	0.22	0.2	0.24	-0.15	1000000000000	TAZ	ENSG00000102125
chrX:48640139:48640241|48640309:+@chrX:48640719:48640803:+	0.64	0.61	0.66	0.77	0.76	0.78	-0.13	1000000000000	PQBP1	ENSG00000102103
chrX:48640139:48640241|48640320:+@chrX:48640719:48640803:+	0.52	0.49	0.55	0.71	0.69	0.72	-0.19	1000000000000	PQBP1	ENSG00000102103
chrX:53587654:53587527|53587572:-@chrX:53586129:53586225:-	0.68	0.64	0.72	0.58	0.56	0.6	0.1	8222.71	HUWE1	ENSG00000086758
chrX:79826317:79826165|79826245:-@chrX:79824620:79824783:-	0.85	0.78	0.9	0.71	0.67	0.74	0.14	18.87	BRWD3	ENSG00000165288
event_name(MXE)	Q157P_posterior_mean	sample1_ci_low	sample1_ci_high	wt_posterior_mean	sample2_ci_low	sample2_ci_high	diff	bayes_factor	proposed_gname	proposed_gname
chr1:109963982:109964423:+@chr1:109965059:109965411:+@chr1:109969448:109969578:+@chr1:109969807:109969937:+	0.27	0.26	0.29	0.17	0.16	0.18	0.1	1000000000000	AMPD2	ENSG00000116337
chr1:114231394:114231692:-@chr1:114230682:114230803:-@chr1:114225918:114226142:-@chr1:114220959:114225285:-	0.45	0.41	0.49	0.59	0.54	0.63	-0.14	3818232	C1orf178	ENSG00000188761
chr1:153299863:153299932:+@chr1:153300515:153300589:+@chr1:153301004:153301217:+@chr1:153301345:153301469:+	0.34	0.3	0.37	0.23	0.22	0.24	0.11	1000000000000	ADAM15	ENSG00000143537
chr1:153299863:153299932:+@chr1:153300518:153300589:+@chr1:153301004:153301075:+@chr1:153301345:153301469:+	0.59	0.54	0.64	0.7	0.68	0.72	-0.11	53	ADAM15	ENSG00000143537
chr1:153299863:153299932:+@chr1:153300518:153300589:+@chr1:153301004:153301217:+@chr1:153301345:153301469:+	0.36	0.32	0.39	0.22	0.21	0.24	0.14	1000000000000	ADAM15	ENSG00000143537
chr1:153428598:153428725:-@chr1:153427263:153427331:-@chr1:153426555:153426644:-@chr1:153426325:153426474:-	0.84	0.76	0.9	0.94	0.91	0.96	-0.1	5.17	MUC1	ENSG00000185499
chr1:153428598:153428725:-@chr1:153427263:153427331:-@chr1:153426555:153426676:-@chr1:153426325:153426474:-	0.83	0.75	0.9	0.93	0.91	0.96	-0.1	5.01	MUC1	ENSG00000185499
chr1:153428598:153428725:-@chr1:153427263:153427470:-@chr1:153426555:153426644:-@chr1:153426325:153426474:-	0.33	0.26	0.4	0.44	0.41	0.47	-0.11	5.15	MUC1	ENSG00000185499
chr1:153428598:153428725:-@chr1:153427263:153427656:-@chr1:153426555:153426644:-@chr1:153426325:153426474:-	0.42	0.35	0.48	0.53	0.5	0.55	-0.11	9.75	MUC1	ENSG00000185499
chr1:158579687:158579895:+@chr1:158580118:158580302:+@chr1:158580890:158581028:+@chr1:158581136:158581240:+	0.62	0.55	0.7	0.78	0.74	0.81	-0.16	70.65	NCSTN	ENSG00000162736
chr1:16784571:16784780:-@chr1:16782676:16782778:-@chr1:16776399:16776501:-@chr1:16775349:16775563:-	0.21	0.17	0.26	0.1	0.08	0.12	0.11	154709	NBPF1	ENSG00000179571
chr1:19796058:19796190:+@chr1:19799868:19800052:+@chr1:19816339:19816417:+@chr1:19821181:19821228:+	0.54	0.46	0.62	0.36	0.34	0.39	0.18	3228.92	RP5-1056L3.3	ENSG00000218307
chr1:206006981:206007163:+@chr1:206007747:206007791:+@chr1:206010289:206010330:+@chr1:206023260:206023298:+	0.61	0.58	0.65	0.73	0.72	0.75	-0.12	1000000000000	CD46	ENSG00000117335
chr1:21201793:21201888:-@chr1:21200279:21200392:-@chr1:21196681:21196713:-@chr1:21180128:21180307:-	0.34	0.27	0.42	0.59	0.55	0.64	-0.25	1000000000000	hsa-mir-1256	ENSG00000221808
chr1:226363473:226363636:-@chr1:226363279:226363345:-@chr1:226362761:226362798:-@chr1:226362559:226362642:-	0.8	0.72	0.87	0.91	0.89	0.92	-0.11	5.78	MRPL55	ENSG00000162910
chr1:226363473:226363636:-@chr1:226363279:226363345:-@chr1:226362761:226362832:-@chr1:226362559:226362642:-	0.29	0.22	0.36	0.13	0.12	0.15	0.16	192716	MRPL55	ENSG00000162910
chr1:54184625:54184810:+@chr1:54186049:54186082:+@chr1:54186123:54186242:+@chr1:54190247:54190733:+	0.19	0.13	0.25	0.09	0.07	0.11	0.1	12.27	LRRC42	ENSG00000116212
chr1:58907244:58907298:-@chr1:58906892:58906942:-@chr1:58906690:58906826:-@chr1:58906107:58906181:-	0.22	0.18	0.25	0.11	0.1	0.12	0.11	45807255	MYSM1	ENSG00000162601
chr10:114907770:114907818:+@chr10:114908416:114908466:+@chr10:114910368:114910440:+@chr10:114915304:114917426:+	0.36	0.25	0.45	0.54	0.46	0.62	-0.18	11.16	TCF7L2	ENSG00000148737
chr10:15035907:15036100:-@chr10:15031041:15031092:-@chr10:15027110:15027194:-@chr10:15021815:15021874:-	0.59	0.53	0.65	0.47	0.44	0.49	0.12	35.4	DCLRE1C	ENSG00000152457
chr10:97883303:97883395:+@chr10:97901163:97901313:+@chr10:97905073:97905123:+@chr10:97905671:97905794:+	0.34	0.29	0.39	0.23	0.2	0.25	0.11	616.45	ZNF518	ENSG00000177853
chr10:97883303:97883395:+@chr10:97901163:97901313:+@chr10:97905073:97905145:+@chr10:97905671:97905794:+	0.6	0.53	0.67	0.44	0.4	0.48	0.16	73.15	ZNF518	ENSG00000177853
chr10:97996730:97996795:-@chr10:97992481:97992530:-@chr10:97977156:97977312:-@chr10:97966399:97966480:-	0.66	0.58	0.74	0.83	0.79	0.87	-0.17	31.27	BLNK	ENSG00000095585
chr10:97996730:97996795:-@chr10:97992481:97992530:-@chr10:97977168:97977312:-@chr10:97966399:97966480:-	0.62	0.54	0.71	0.81	0.77	0.85	-0.19	306.13	BLNK	ENSG00000095585
chr11:124000777:124001009:+@chr11:124001579:124001715:+@chr11:124001799:124001857:+@chr11:124002010:124002156:+	0.6	0.56	0.65	0.4	0.38	0.42	0.2	1000000000000	TBRG1	ENSG00000154144
chr11:3348781:3348876:-@chr11:3340352:3340408:-@chr11:3338526:3338594:-@chr11:3335733:3338371:-	0.42	0.35	0.49	0.65	0.62	0.69	-0.23	1000000000000	ZNF195	ENSG00000005801
chr11:3348781:3348876:-@chr11:3340352:3340408:-@chr11:3339549:3339695:-@chr11:3335733:3338371:-	0.52	0.46	0.58	0.69	0.66	0.72	-0.17	14567.6	ZNF195	ENSG00000005801
chr11:3348781:3348876:-@chr11:3340352:3340408:-@chr11:3339603:3339695:-@chr11:3335733:3338371:-	0.01	0	0.03	0.11	0.09	0.14	-0.1	1000000000000	ZNF195	ENSG00000005801
chr11:3356844:3357028:-@chr11:3355423:3355706:-@chr11:3351383:3351462:-@chr11:3349383:3349509:-	0.58	0.53	0.64	0.48	0.46	0.5	0.1	48.37	ZNF195	ENSG00000005801
chr11:35167958:35168188:+@chr11:35176244:35176369:+@chr11:35184235:35184366:+@chr11:35186228:35186329:+	0.4	0.37	0.43	0.57	0.56	0.59	-0.17	1000000000000	CD44	ENSG00000026508
chr11:604476:604534:-@chr11:604174:604399:-@chr11:603951:604037:-@chr11:603785:603865:-	0.52	0.5	0.54	0.66	0.65	0.67	-0.14	1000000000000	IRF7	ENSG00000185507
chr11:73109539:73109592:-@chr11:73107478:73107583:-@chr11:73107306:73107411:-@chr11:73104944:73105055:-	0.12	0.1	0.13	0.24	0.22	0.25	-0.12	1000000000000	RAB6A	ENSG00000175582
chr12:64849902:64850074:-@chr12:64848962:64849400:-@chr12:64840212:64840352:-@chr12:64833387:64833495:-	0.8	0.75	0.85	0.69	0.66	0.71	0.11	2710.8	TMBIM4	ENSG00000155957
chr12:70519754:70519858:+@chr12:70534832:70534900:+@chr12:70541452:70541543:+@chr12:70552117:70552215:+	0.21	0.14	0.29	0.04	0.02	0.05	0.17	2.23053e+09	TBC1D15	ENSG00000121749
chr14:100365124:100365839:+@chr14:100367511:100367624:+@chr14:100371826:100371969:+@chr14:100372257:100372390:+	0.6	0.56	0.65	0.82	0.78	0.86	-0.22	1000000000000	AL117190.6-3	ENSG00000214515
chr14:100365124:100365839:+@chr14:100368602:100368731:+@chr14:100371826:100371969:+@chr14:100372257:100372390:+	0.7	0.65	0.74	0.86	0.82	0.89	-0.16	6.80888e+09	AL117190.6-3	ENSG00000214515
chr14:100367511:100367624:+@chr14:100368602:100368731:+@chr14:100370722:100370841:+@chr14:100372257:100372390:+	0.53	0.46	0.6	0.35	0.27	0.43	0.18	38.24	AL117190.6-3	ENSG00000214515
chr14:100367511:100367624:+@chr14:100368602:100368731:+@chr14:100370722:100370845:+@chr14:100372257:100372390:+	0.56	0.49	0.63	0.34	0.26	0.42	0.22	51.07	AL117190.6-3	ENSG00000214515
chr14:100367511:100367624:+@chr14:100368602:100368731:+@chr14:100371829:100371969:+@chr14:100372257:100372390:+	0.71	0.66	0.75	0.85	0.82	0.89	-0.14	1.21037e+10	AL117190.6-3	ENSG00000214515
chr14:101298995:101299060:+@chr14:101322108:101322273:+@chr14:101355082:101355175:+@chr14:101392776:101392975:+	0.81	0.74	0.89	0.51	0.48	0.55	0.3	1000000000000	U6	ENSG00000207208
chr14:57834426:57834603:-@chr14:57830237:57832282:-@chr14:57829537:57829609:-@chr14:57828106:57828178:-	0.72	0.69	0.75	0.56	0.54	0.57	0.16	1000000000000	AL132989.5-2	ENSG00000209824
chr15:20751678:20751847:-@chr15:20749951:20750116:-@chr15:20747603:20747732:-@chr15:20746154:20746340:-	0.38	0.36	0.4	0.09	0.08	0.09	0.29	1000000000000	WHAMML1	ENSG00000187667
chr15:23205328:23205447:-@chr15:23204860:23204924:-@chr15:23203307:23203502:-@chr15:23201701:23201742:-	0.88	0.76	0.96	0.65	0.61	0.7	0.23	122.12	UBE3A	ENSG00000114062
chr15:55740940:55741023:+@chr15:55754458:55754558:+@chr15:55791474:55791678:+@chr15:55794026:55797045:+	0.72	0.69	0.75	0.99	0.99	1	-0.27	1000000000000	GRINL1A	ENSG00000137878
chr15:55754458:55754558:+@chr15:55763892:55764164:+@chr15:55785424:55786445:+@chr15:55788675:55788848:+	0.13	0.12	0.15	0.37	0.35	0.39	-0.24	1000000000000	GRINL1A	ENSG00000137878
chr15:66284637:66285502:-@chr15:66284513:66284543:-@chr15:66278933:66279073:-@chr15:66276832:66277020:-	0.19	0.16	0.23	0.61	0.59	0.64	-0.42	1000000000000	CALML4	ENSG00000129007
chr16:626095:626348:-@chr16:625613:625775:-@chr16:625282:625341:-@chr16:624720:624798:-	0.53	0.5	0.57	0.78	0.76	0.79	-0.25	1000000000000	C16orf13	ENSG00000130731
chr17:26086177:26086241:+@chr17:26094445:26094513:+@chr17:26110635:26110683:+@chr17:26117647:26117732:+	0.5	0.46	0.54	0.4	0.39	0.42	0.1	8035.32	SUZ12P	ENSG00000197522
chr17:35202452:35202712:-@chr17:35201195:35201362:-@chr17:35187430:35187546:-@chr17:35167494:35176272:-	0.33	0.25	0.42	0.5	0.45	0.55	-0.17	16.3	IKZF3	ENSG00000161405
chr17:37560437:37560548:-@chr17:37543306:37543422:-@chr17:37537151:37537366:-@chr17:37535881:37536134:-	0.36	0.33	0.4	0.15	0.13	0.16	0.21	1000000000000	RAB5C	ENSG00000108774
chr17:3778706:3778823:-@chr17:3778270:3778370:-@chr17:3778024:3778081:-@chr17:3773918:3775484:-	0.16	0.13	0.19	0.06	0.06	0.08	0.1	1.63805e+10	ATP2A3	ENSG00000074370
chr17:3778706:3778823:-@chr17:3778283:3778370:-@chr17:3778024:3778081:-@chr17:3773918:3775484:-	0.49	0.44	0.54	0.2	0.18	0.27	0.29	1000000000000	ATP2A3	ENSG00000074370
chr17:70210769:70210832:-@chr17:70206103:70206215:-@chr17:70203929:70203951:-@chr17:70203459:70203593:-	0.81	0.77	0.84	0.71	0.69	0.72	0.1	360375	CD300LF	ENSG00000186074
chr17:71602090:71602257:-@chr17:71598819:71598911:-@chr17:71598005:71598073:-@chr17:71596851:71596996:-	0.65	0.62	0.69	0.46	0.44	0.48	0.19	1000000000000	EXOC7	ENSG00000182473
chr17:78001865:78001996:-@chr17:78000335:78000457:-@chr17:77998745:77998786:-@chr17:77997788:77997861:-	0.27	0.23	0.32	0.47	0.46	0.49	-0.2	1000000000000	C17orf62	ENSG00000178927
chr19:1566685:1566820:-@chr19:1566284:1566519:-@chr19:1563206:1563429:-@chr19:1560295:1562848:-	0.47	0.45	0.49	0.57	0.56	0.57	-0.1	1000000000000	TCF3	ENSG00000071564
chr19:4133471:4133596:-@chr19:4131779:4131906:-@chr19:4130101:4130283:-@chr19:4128076:4128135:-	0.62	0.57	0.66	0.5	0.48	0.52	0.12	3.62196e+07	SIRT6	ENSG00000077463
chr19:4133471:4133596:-@chr19:4131779:4131906:-@chr19:4130101:4130285:-@chr19:4128076:4128135:-	0.6	0.56	0.64	0.48	0.46	0.5	0.12	1000000000000	SIRT6	ENSG00000077463
chr19:58715989:58717150:+@chr19:58717683:58717750:+@chr19:58734282:58734348:+@chr19:58750911:58750974:+	0.75	0.69	0.8	0.6	0.58	0.63	0.15	1895.07	ZNF331	ENSG00000130844
chr2:111597781:111597917:+@chr2:111598098:111598187:+@chr2:111624092:111624195:+@chr2:111638181:111642493:+	0.49	0.41	0.55	0.6	0.58	0.63	-0.11	10.31	BCL2L11	ENSG00000153094
chr2:218954996:218955342:+@chr2:218955927:218956069:+@chr2:218957210:218957332:+@chr2:218958114:218958233:+	0.4	0.36	0.44	0.52	0.51	0.53	-0.12	1000000000000	SLC11A1	ENSG00000018280
chr2:227913252:227913340:+@chr2:227915705:227915779:+@chr2:227925474:227925533:+@chr2:227928637:227928721:+	0.54	0.5	0.58	0.38	0.36	0.4	0.16	1000000000000	MFF	ENSG00000168958
chr2:61266141:61266257:+@chr2:61266478:61266504:+@chr2:61266619:61266720:+@chr2:61267085:61267136:+	0.65	0.57	0.72	0.82	0.78	0.86	-0.17	28.43	AHSA2	ENSG00000173209
chr2:86870962:86871315:-@chr2:86870274:86870384:-@chr2:86869957:86870067:-@chr2:86869164:86869194:-	0.79	0.74	0.83	0.61	0.56	0.66	0.18	9.30445e+11	CD8A	ENSG00000153563
chr2:99139196:99139321:+@chr2:99139622:99139749:+@chr2:99141192:99141307:+@chr2:99144852:99146045:+	0.8	0.69	0.89	0.94	0.92	0.97	-0.14	13.83	MRPL30	ENSG00000185414
chr20:17897018:17897100:-@chr20:17885577:17885681:-@chr20:17884009:17884119:-@chr20:17882640:17882761:-	0.61	0.58	0.63	0.71	0.7	0.71	-0.1	1000000000000	SNORD17	ENSG00000212232
chr20:61975465:61975613:+@chr20:61984516:61984617:+@chr20:61990987:61991035:+@chr20:61991647:61993342:+	0.46	0.43	0.49	0.36	0.35	0.38	0.1	1000000000000	TPD52L2	ENSG00000101150
chr21:38696349:38696429:-@chr21:38694366:38694437:-@chr21:38686168:38686236:-@chr21:38685451:38685507:-	0.38	0.35	0.41	0.24	0.23	0.26	0.14	1000000000000	ERG	ENSG00000157554
chr21:41539759:41539860:+@chr21:41544549:41544698:+@chr21:41550955:41551123:+@chr21:41569168:41570394:+	0.38	0.32	0.44	0.51	0.48	0.55	-0.13	98.94	BACE2	ENSG00000182240
chr3:123293138:123293187:+@chr3:123307735:123308037:+@chr3:123310802:123310945:+@chr3:123319585:123319630:+	0.74	0.68	0.79	0.61	0.59	0.62	0.13	85.82	CD86	ENSG00000114013
chr3:198292319:198292385:-@chr3:198287854:198287950:-@chr3:198287105:198287138:-@chr3:198280487:198280528:-	0.69	0.63	0.76	0.51	0.47	0.55	0.18	54025.3	DLG1	ENSG00000075711
chr3:198292319:198292385:-@chr3:198287854:198287953:-@chr3:198287105:198287138:-@chr3:198280487:198280528:-	0.77	0.71	0.82	0.65	0.62	0.68	0.12	14.92	DLG1	ENSG00000075711
chr4:129124944:129125028:+@chr4:129130326:129130426:+@chr4:129142321:129142365:+@chr4:129149525:129149603:+	0.71	0.66	0.77	0.93	0.92	0.95	-0.22	1000000000000	C4orf29	ENSG00000164074
chr4:20315381:20315535:+@chr4:20318524:20318591:+@chr4:20320404:20320494:+@chr4:20323509:20323643:+	0.41	0.36	0.47	0.51	0.49	0.54	-0.1	5.65	PACRGL	ENSG00000163138
chr5:175721211:175721415:-@chr5:175719420:175719527:-@chr5:175719090:175719176:-@chr5:175715180:175715358:-	0.43	0.4	0.47	0.53	0.52	0.55	-0.1	69124	KIAA1191	ENSG00000122203
chr6:109803970:109804008:-@chr6:109798307:109798363:-@chr6:109796818:109796913:-@chr6:109794410:109796221:-	0.41	0.39	0.44	0.24	0.23	0.28	0.17	1000000000000	CD164	ENSG00000135535
chr6:109805796:109805867:-@chr6:109803970:109804008:-@chr6:109798307:109798363:-@chr6:109794416:109796913:-	0.37	0.36	0.39	0.53	0.52	0.54	-0.16	1000000000000	CD164	ENSG00000135535
chr6:112130781:112130930:-@chr6:112128000:112128164:-@chr6:112127411:112127566:-@chr6:112124173:112124352:-	0.48	0.45	0.5	0.26	0.25	0.27	0.22	1000000000000	FYN	ENSG00000010810
chr6:135558579:135558748:+@chr6:135559557:135559739:+@chr6:135559792:135560154:+@chr6:135561739:135561881:+	0.81	0.78	0.85	0.56	0.55	0.58	0.25	1000000000000	MYB	ENSG00000118513
chr6:135558579:135558833:+@chr6:135559557:135559739:+@chr6:135559792:135560154:+@chr6:135561739:135561881:+	0.8	0.77	0.84	0.51	0.5	0.53	0.29	1000000000000	MYB	ENSG00000118513
chr6:144328988:144329060:-@chr6:144327617:144327648:-@chr6:144323299:144323372:-@chr6:144303130:144305493:-	0.88	0.8	0.93	0.71	0.67	0.74	0.17	173729	PLAGL1	ENSG00000118495
chr6:144331737:144331808:-@chr6:144327617:144327648:-@chr6:144323299:144323372:-@chr6:144303130:144305493:-	0.91	0.82	0.96	0.72	0.68	0.77	0.19	1.34814e+09	PLAGL1	ENSG00000118495
chr6:144331737:144331808:-@chr6:144328988:144329060:-@chr6:144327617:144327648:-@chr6:144323299:144323372:-	0.66	0.57	0.75	0.49	0.45	0.53	0.17	26.56	PLAGL1	ENSG00000118495
chr6:31432842:31432968:-@chr6:31432444:31432713:-@chr6:31347355:31347624:-@chr6:31346829:31347104:-	0.81	0.8	0.81	0.49	0.48	0.49	0.32	1000000000000	WASF5P	ENSG00000216590
chr6:31662956:31663074:+@chr6:31663397:31663489:+@chr6:31663700:31663722:+@chr6:31664253:31664665:+	0.73	0.71	0.76	0.49	0.48	0.5	0.24	1000000000000	LST1	ENSG00000204482
chr6:31662956:31663074:+@chr6:31663397:31663489:+@chr6:31663700:31663722:+@chr6:31664274:31664665:+	0.53	0.51	0.55	0.42	0.42	0.43	0.11	1000000000000	LST1	ENSG00000204482
chr6:31662956:31663074:+@chr6:31663397:31663489:+@chr6:31663700:31663722:+@chr6:31664319:31664665:+	0.73	0.71	0.75	0.58	0.57	0.59	0.15	1000000000000	LST1	ENSG00000204482
chr6:31759744:31759796:-@chr6:31758806:31759097:-@chr6:31756986:31757157:-@chr6:31754857:31755024:-	0.33	0.27	0.4	0.1	0.08	0.12	0.23	1000000000000	LY6G5C	ENSG00000204428
chr6:33012927:33013211:-@chr6:33011291:33011407:-@chr6:33011097:33011132:-@chr6:33010393:33010742:-	0.38	0.35	0.4	0.53	0.52	0.55	-0.15	1000000000000	AL645941.11	ENSG00000212066
chr6:43854604:43854633:+@chr6:43856447:43856518:+@chr6:43857671:43857767:+@chr6:43860256:43862201:+	0.91	0.78	0.98	0.45	0.39	0.5	0.46	1000000000000	VEGF	ENSG00000112715
chr7:128373791:128373852:+@chr7:128374313:128374346:+@chr7:128374520:128374825:+@chr7:128375019:128375411:+	0.89	0.82	0.96	0.75	0.73	0.77	0.14	333.65	IRF5	ENSG00000128604
chr7:29502093:29502177:+@chr7:29506008:29506181:+@chr7:29510885:29510962:+@chr7:29515442:29515547:+	0.82	0.71	0.92	0.97	0.95	0.98	-0.15	8.52	CHN2	ENSG00000106069
chr7:44651451:44651642:+@chr7:44653568:44653658:+@chr7:44653781:44653883:+@chr7:44662442:44662486:+	0.62	0.57	0.67	0.73	0.71	0.75	-0.11	302.57	OGDH	ENSG00000105953
chr8:100584240:100584354:+@chr8:100588541:100588607:+@chr8:100589174:100589315:+@chr8:100592508:100592916:+	0.07	0.05	0.1	0.17	0.16	0.19	-0.1	1000000000000	VPS13B	ENSG00000132549
chr8:11762919:11763055:-@chr8:11759294:11759381:-@chr8:11756324:11756397:-@chr8:11748247:11748397:-	0.72	0.64	0.8	0.87	0.84	0.9	-0.15	575.86	CTSB	ENSG00000164733
chrX:138647741:138647894:-@chrX:138647556:138647621:-@chrX:138641476:138641580:-@chrX:138636171:138638787:-	0.54	0.44	0.64	0.82	0.77	0.87	-0.28	1.16958e+10	ATP11C	ENSG00000101974
chrX:151841373:151841456:+@chrX:151841920:151842009:+@chrX:151847775:151847861:+@chrX:151850872:151850976:+	0.55	0.52	0.58	0.31	0.3	0.32	0.24	1000000000000	ZNF185	ENSG00000147394
chrX:151841373:151841456:+@chrX:151847775:151847861:+@chrX:151850872:151850976:+@chrX:151857274:151857363:+	0.72	0.68	0.76	0.51	0.49	0.53	0.21	1000000000000	ZNF185	ENSG00000147394
chrX:151841920:151842009:+@chrX:151847775:151847861:+@chrX:151850872:151850976:+@chrX:151857274:151857363:+	0.66	0.61	0.7	0.44	0.42	0.46	0.22	1000000000000	ZNF185	ENSG00000147394
chrX:153295013:153295098:+@chrX:153295632:153295721:+@chrX:153301076:153301156:+@chrX:153301238:153301279:+	0.39	0.36	0.42	0.24	0.22	0.26	0.15	1000000000000	TAZ	ENSG00000102125
chrX:153686741:153686957:-@chrX:153686166:153686296:-@chrX:153681214:153681362:-@chrX:153673611:153673754:-	0.95	0.93	0.97	0.84	0.82	0.87	0.11	1000000000000	MPP1	ENSG00000130830
chrY:1374320:1374349:+@chrY:1379384:1379519:+@chrY:1382816:1382912:+@chrY:1384339:1384420:+	0.51	0.47	0.54	0.41	0.4	0.43	0.1	1.82941e+11	NA	NA
chrY:13976649:13976672:-@chrY:13976277:13976366:-@chrY:13956837:13957074:-@chrY:13947495:13947624:-	0.95	0.91	0.98	0.83	0.81	0.85	0.12	2514.06	UTY	ENSG00000183878
chrY:13976649:13976672:-@chrY:13976277:13976366:-@chrY:13956837:13957609:-@chrY:13947495:13947624:-	0.96	0.92	0.98	0.82	0.8	0.84	0.14	1000000000000	UTY	ENSG00000183878
event_name(RI)	Q157P_posterior_mean	sample1_ci_low	sample1_ci_high	wt_posterior_mean	sample2_ci_low	sample2_ci_high	diff	bayes_factor	proposed_gname	proposed_gname
chr1:10445853-10445702:-@chr1:10444346-10443190:-	0.26	0.24	0.28	0.37	0.36	0.38	-0.11	1000000000000	DFFA	ENSG00000160049
chr1:10445853-10445702:-@chr1:10444346-10443192:-	0.26	0.24	0.28	0.37	0.36	0.38	-0.11	1000000000000	DFFA	ENSG00000160049
chr1:153241730-153241769:+@chr1:153241943-153242043:+	0.49	0.39	0.59	0.68	0.61	0.75	-0.19	9.94	ZBTB7B	ENSG00000160685
chr1:153848104-153848242:+@chr1:153848398-153848515:+	0.46	0.41	0.5	0.35	0.33	0.36	0.11	12186.9	MSTO1	ENSG00000125459
chr1:154152379-154152288:-@chr1:154150735-154149460:-	0.71	0.69	0.73	0.58	0.57	0.59	0.13	1000000000000	KIAA0907	ENSG00000132680
chr1:154374069-154374158:+@chr1:154374903-154375172:+	0.29	0.26	0.31	0.43	0.42	0.43	-0.14	1000000000000	LMNA	ENSG00000160789
chr1:159403514-159403648:+@chr1:159403785-159403900:+	0.38	0.32	0.44	0.48	0.46	0.5	-0.1	8.18	PPOX	ENSG00000143224
chr1:169940297-169940150:-@chr1:169937847-169935919:-	0.56	0.53	0.58	0.38	0.37	0.39	0.18	1000000000000	VAMP4	ENSG00000117533
chr1:178432020-178432357:+@chr1:178433091-178433792:+	0.49	0.48	0.5	0.64	0.63	0.65	-0.15	1000000000000	QSOX1	ENSG00000116260
chr1:178432020-178432648:+@chr1:178433091-178433792:+	0.48	0.46	0.49	0.65	0.65	0.66	-0.17	1000000000000	QSOX1	ENSG00000116260
chr1:202037326-202037379:+@chr1:202038403-202038767:+	0.98	0.95	1	0.83	0.81	0.85	0.15	1000000000000	ZC3H11A	ENSG00000058673
chr1:210859011-210859231:+@chr1:210859323-210860739:+	0.28	0.23	0.35	0.42	0.4	0.43	-0.14	286.5	ATF3	ENSG00000162772
chr1:2476-2584:+@chr1:3084-4272:+	0.25	0.17	0.35	0.52	0.48	0.56	-0.27	6.94679e+06	RP11-34P13.1	ENSG00000219789
chr1:28779080-28779011:-@chr1:28778686-28778632:-	0.51	0.45	0.56	0.35	0.33	0.37	0.16	5.38324e+08	SNORA61	ENSG00000207311
chr1:28779745-28779659:-@chr1:28779080-28778632:-	0.54	0.51	0.57	0.44	0.43	0.45	0.1	1000000000000	SNORA44	ENSG00000207314
chr1:3538081-3537890:-@chr1:3537541-3537191:-	0.5	0.46	0.55	0.64	0.62	0.66	-0.14	4.11615e+10	WDR8	ENSG00000116213
chr1:3646811-3646657:-@chr1:3644937-3642408:-	0.67	0.63	0.71	0.83	0.82	0.84	-0.16	1000000000000	NA	NA
chr1:37930660-37930837:+@chr1:37930935-37931043:+	0.88	0.84	0.91	0.75	0.73	0.78	0.13	1000000000000	CDCA8	ENSG00000134690
chr1:37930746-37930837:+@chr1:37930935-37931043:+	0.84	0.79	0.88	0.7	0.67	0.73	0.14	1000000000000	CDCA8	ENSG00000134690
chr1:44451712-44451786:+@chr1:44451968-44452117:+	0.19	0.16	0.22	0.31	0.3	0.33	-0.12	1000000000000	DMAP1	ENSG00000178028
chr1:45789042-45789135:+@chr1:45789225-45789414:+	0.25	0.22	0.28	0.42	0.41	0.44	-0.17	1000000000000	AKR1A1	ENSG00000117448
chr10:102736722-102736496:-@chr10:102736319-102736017:-	0.87	0.83	0.9	0.99	0.99	0.99	-0.12	1000000000000	MRPL43	ENSG00000055950
chr10:11410895-11411066:+@chr10:11412425-11414611:+	0.72	0.7	0.73	0.62	0.61	0.62	0.1	1000000000000	CUGBP2	ENSG00000048740
chr10:11410895-11411066:+@chr10:11412425-11416363:+	0.77	0.75	0.78	0.67	0.66	0.67	0.1	1000000000000	CUGBP2	ENSG00000048740
chr10:124912118-124912334:+@chr10:124913326-124914869:+	0.22	0.21	0.23	0.12	0.12	0.13	0.1	1000000000000	BUB3	ENSG00000154473
chr10:38162050-38161959:-@chr10:38160246-38157699:-	0.32	0.29	0.36	0.56	0.55	0.58	-0.24	1000000000000	ZNF248	ENSG00000198105
chr10:38162050-38161959:-@chr10:38160246-38157905:-	0.3	0.27	0.34	0.54	0.52	0.56	-0.24	1000000000000	ZNF248	ENSG00000198105
chr10:45258492-45258670:+@chr10:45258870-45258991:+	0.48	0.45	0.51	0.35	0.34	0.36	0.13	1000000000000	AL731567.6	ENSG00000215136
chr10:57790150-57789947:-@chr10:57789620-57789454:-	0.71	0.64	0.78	0.56	0.53	0.59	0.15	2046.33	ZWINT	ENSG00000122952
chr10:98704700-98705581:+@chr10:98708159-98714188:+	0.74	0.72	0.76	0.6	0.59	0.61	0.14	1000000000000	LCOR	ENSG00000196233
chr11:10283803-10283921:+@chr11:10284072-10284221:+	0.3	0.28	0.33	0.18	0.17	0.19	0.12	1000000000000	ADM	ENSG00000148926
chr11:280678-281113:+@chr11:281976-282095:+	0.24	0.22	0.27	0.34	0.33	0.35	-0.1	1000000000000	ATHL1	ENSG00000142102
chr11:5675054-5675149:+@chr11:5676121-5676351:+	0.6	0.59	0.61	0.5	0.5	0.51	0.1	1000000000000	TRIM22	ENSG00000132274
chr11:63875208-63875303:+@chr11:63875524-63875664:+	0.29	0.28	0.3	0.44	0.43	0.46	-0.15	1000000000000	CCDC88B	ENSG00000168071
chr11:6475391-6475473:+@chr11:6475577-6476767:+	0.67	0.6	0.74	0.83	0.8	0.86	-0.16	405.5	C11orf47	ENSG00000179532
chr11:6522380-6522477:+@chr11:6522598-6524471:+	0.53	0.45	0.61	0.74	0.7	0.77	-0.21	2.53445e+06	DNHD1L	ENSG00000132249
chr11:65790480-65790537:+@chr11:65790920-65791906:+	0.36	0.28	0.46	0.18	0.16	0.2	0.18	14600.9	KLC2	ENSG00000174996
chr11:65790480-65790537:+@chr11:65790920-65791907:+	0.37	0.28	0.47	0.18	0.16	0.2	0.19	4929.43	KLC2	ENSG00000174996
chr11:66830885-66831009:+@chr11:66831089-66831160:+	0.24	0.19	0.29	0.12	0.1	0.14	0.12	1.06122e+07	SSH3	ENSG00000172830
chr11:791120-790985:-@chr11:790912-790762:-	0.17	0.14	0.21	0.27	0.25	0.29	-0.1	171.26	LRDD	ENSG00000177595
chr11:793647-793174:-@chr11:792891-792682:-	0.49	0.44	0.55	0.37	0.35	0.39	0.12	7.63694e+06	LRDD	ENSG00000177595
chr11:820866-821032:+@chr11:821224-821295:+	0.17	0.14	0.2	0.27	0.24	0.31	-0.1	60.18	EFCAB4A	ENSG00000177685
chr12:112745509-112745397:-@chr12:112744834-112744242:-	0.45	0.41	0.49	0.58	0.56	0.6	-0.13	1000000000000	RBM19	ENSG00000122965
chr12:112745509-112745397:-@chr12:112744834-112744246:-	0.45	0.41	0.48	0.58	0.56	0.6	-0.13	1000000000000	RBM19	ENSG00000122965
chr12:121534063-121533960:-@chr12:121533844-121533779:-	0.57	0.53	0.61	0.37	0.35	0.4	0.2	1000000000000	ZCCHC8	ENSG00000033030
chr12:122026311-122026367:+@chr12:122027154-122027267:+	0.48	0.39	0.56	0.29	0.27	0.31	0.19	17972.7	OGFOD2	ENSG00000111325
chr12:15639138-15639258:+@chr12:15640291-15641602:+	0.71	0.66	0.77	0.54	0.5	0.59	0.17	2180.89	PTPRO	ENSG00000151490
chr12:15639138-15639258:+@chr12:15640291-15642532:+	0.87	0.82	0.91	0.73	0.69	0.78	0.14	80.57	PTPRO	ENSG00000151490
chr12:21545796-21545614:-@chr12:21545416-21545371:-	0.4	0.36	0.45	0.52	0.5	0.55	-0.12	2049.23	RECQL	ENSG00000004700
chr12:21545870-21545614:-@chr12:21545416-21545371:-	0.46	0.41	0.52	0.57	0.54	0.6	-0.11	87.88	RECQL	ENSG00000004700
chr12:30676212-30676096:-@chr12:30675158-30673190:-	0.54	0.51	0.58	0.37	0.36	0.38	0.17	1000000000000	IPO8	ENSG00000133704
chr12:48472638-48472496:-@chr12:48472101-48471196:-	0.19	0.15	0.23	0.32	0.31	0.34	-0.13	1000000000000	KIAA1602	ENSG00000167566
chr12:52393257-52393151:-@chr12:52392172-52391170:-	0.11	0.11	0.12	0.23	0.23	0.24	-0.12	1000000000000	CALCOCO1	ENSG00000012822
chr12:56197803-56197756:-@chr12:56197474-56197319:-	0.92	0.88	0.95	0.77	0.76	0.78	0.15	1000000000000	DDIT3	ENSG00000175197
chr12:56197803-56197756:-@chr12:56197569-56197319:-	0.79	0.75	0.83	0.91	0.9	0.92	-0.12	8.4923e+08	DDIT3	ENSG00000175197
chr12:56281576-56281686:+@chr12:56281976-56283465:+	0.85	0.81	0.89	0.96	0.95	0.97	-0.11	1.25741e+07	PIP4K2C	ENSG00000166908
chr12:56281576-56281686:+@chr12:56281976-56283478:+	0.85	0.8	0.89	0.96	0.95	0.97	-0.11	647782	PIP4K2C	ENSG00000166908
chr13:114055761-114056058:+@chr13:114056141-114056252:+	0.61	0.57	0.64	0.75	0.74	0.76	-0.14	1000000000000	CDC16	ENSG00000130177
chr13:28173718-28173638:-@chr13:28173093-28172218:-	0.91	0.86	0.94	0.8	0.78	0.81	0.11	4614.1	SLC46A3	ENSG00000139508
chr13:49469144-49469268:+@chr13:49469804-49469900:+	0.69	0.65	0.73	0.58	0.57	0.59	0.11	1.21159e+09	TRIM13	ENSG00000204977
chr14:105378071-105377748:-@chr14:105375810-105375693:-	0.16	0.14	0.18	0.06	0.05	0.07	0.1	1000000000000	IGHD	ENSG00000211898
chr14:19895395-19895519:+@chr14:19895637-19895902:+	0.67	0.61	0.73	0.39	0.37	0.42	0.28	1000000000000	PARP2	ENSG00000129484
chr14:20012471-20012574:+@chr14:20012772-20012947:+	0.36	0.35	0.36	0.23	0.22	0.23	0.13	1000000000000	NP	ENSG00000198805
chr14:22309242-22309327:+@chr14:22309510-22309674:+	0.35	0.34	0.37	0.25	0.24	0.25	0.1	1000000000000	OXA1L	ENSG00000155463
chr14:23095038-23095392:+@chr14:23095792-23096083:+	0.66	0.6	0.72	0.76	0.74	0.78	-0.1	16.48	THTPA	ENSG00000157306
chr14:23095038-23095392:+@chr14:23095792-23096088:+	0.66	0.61	0.72	0.76	0.74	0.79	-0.1	14	THTPA	ENSG00000157306
chr14:23105209-23105113:-@chr14:23104941-23104865:-	0.54	0.51	0.56	0.43	0.42	0.44	0.11	1000000000000	AP1G2	ENSG00000213983
chr14:80367391-80367240:-@chr14:80366380-80366262:-	0.14	0.1	0.17	0.24	0.21	0.27	-0.1	90.64	C14orf145	ENSG00000100629
chr14:80806969-80806767:-@chr14:80798028-80796747:-	0.7	0.69	0.72	0.45	0.44	0.46	0.25	1000000000000	STON2	ENSG00000140022
chr15:39916558-39916864:+@chr15:39919515-39919720:+	0.93	0.86	0.99	0.75	0.72	0.78	0.18	39449.4	JMJD7-PLA2G4B	ENSG00000168970
chr15:87626000-87626070:+@chr15:87627371-87627485:+	0.45	0.42	0.49	0.34	0.33	0.36	0.11	1.84893e+06	FANCI	ENSG00000140525
chr15_random:659328-659482:+@chr15_random:660653-660790:+	0.26	0.19	0.35	0.49	0.44	0.54	-0.23	835.47	NA	NA
chr16:2762104-2761996:-@chr16:2761606-2761416:-	0.73	0.7	0.77	0.95	0.94	0.96	-0.22	1000000000000	TCEB2	ENSG00000103363
chr16:2762104-2761996:-@chr16:2761606-2761417:-	0.73	0.69	0.77	0.95	0.94	0.96	-0.22	1000000000000	TCEB2	ENSG00000103363
chr16:28528150-28527881:-@chr16:28527681-28527530:-	0.81	0.72	0.89	0.67	0.65	0.69	0.14	11.01	SULT1A1	ENSG00000196502
chr16:29905087-29905326:+@chr16:29907181-29907220:+	0.32	0.28	0.36	0.53	0.5	0.56	-0.21	1000000000000	TAOK2	ENSG00000149930
chr16:3014288-3014183:-@chr16:3013970-3013849:-	0.63	0.59	0.68	0.74	0.72	0.76	-0.11	171280	HCFC1R1	ENSG00000103145
chr16:31030691-31030849:+@chr16:31030943-31031389:+	0.39	0.35	0.43	0.28	0.27	0.3	0.11	2.4304e+08	BCKDK	ENSG00000103507
chr16:31030691-31030849:+@chr16:31030943-31031613:+	0.43	0.39	0.48	0.32	0.31	0.33	0.11	124140	BCKDK	ENSG00000103507
chr16:65868914-65871947:+@chr16:65872115-65872210:+	0.79	0.7	0.87	0.62	0.58	0.65	0.17	29.8	PLEKHG4	ENSG00000196155
chr16:66423949-66423859:-@chr16:66423719-66423632:-	0.08	0.06	0.09	0.18	0.17	0.19	-0.1	1000000000000	CENPT	ENSG00000102901
chr16:82773165-82773049:-@chr16:82772970-82772853:-	0.76	0.71	0.8	0.63	0.61	0.65	0.13	3.93652e+09	TAF1C	ENSG00000103168
chr16:88317046-88317092:+@chr16:88317169-88317618:+	0.37	0.32	0.42	0.47	0.45	0.49	-0.1	23.21	ZNF276	ENSG00000158805
chr17:1564058-1563747:-@chr17:1562443-1561548:-	0.65	0.62	0.68	0.84	0.83	0.85	-0.19	1000000000000	hsa-mir-22	ENSG00000199060
chr17:1564058-1563747:-@chr17:1562939-1561548:-	0.72	0.69	0.76	0.93	0.91	0.94	-0.21	1000000000000	hsa-mir-22	ENSG00000199060
chr17:17661955-17661735:-@chr17:17661630-17661587:-	0.36	0.31	0.42	0.55	0.51	0.59	-0.19	1.9099e+10	SREBF1	ENSG00000072310
chr17:37967618-37967763:+@chr17:37968156-37968866:+	0.66	0.63	0.7	0.76	0.75	0.78	-0.1	1.06656e+10	COASY	ENSG00000068120
chr17:37967618-37967763:+@chr17:37968477-37968866:+	0.77	0.74	0.8	0.87	0.86	0.88	-0.1	1000000000000	COASY	ENSG00000068120
chr17:43270815-43270635:-@chr17:43270367-43270046:-	0.33	0.3	0.37	0.44	0.42	0.45	-0.11	1000000000000	SCRN2	ENSG00000141295
chr17:43270815-43270635:-@chr17:43270367-43270057:-	0.33	0.3	0.36	0.43	0.42	0.45	-0.1	1000000000000	SCRN2	ENSG00000141295
chr17:43407879-43408018:+@chr17:43408234-43408378:+	0.83	0.82	0.85	0.71	0.7	0.71	0.12	1000000000000	CDK5RAP3	ENSG00000108465
chr17:7096275-7096380:+@chr17:7096469-7096639:+	0.79	0.73	0.85	0.92	0.9	0.94	-0.13	2608.97	C17orf81	ENSG00000170291
chr17:71893127-71893330:+@chr17:71893661-71893813:+	0.41	0.35	0.48	0.9	0.85	0.93	-0.49	1000000000000	SPHK1	ENSG00000176170
chr17:75969942-75970122:+@chr17:75971374-75971465:+	0.3	0.28	0.31	0.4	0.39	0.41	-0.1	1000000000000	RNF213	ENSG00000173821
chr17:76825854-76825782:-@chr17:76825466-76825375:-	0.44	0.39	0.48	0.32	0.3	0.33	0.12	1.22988e+10	C17orf56	ENSG00000167302
chr17_random:2339520-2339447:-@chr17_random:2339143-2338652:-	0.73	0.69	0.77	0.83	0.81	0.85	-0.1	99835.6	NA	NA
chr17_random:2339522-2339447:-@chr17_random:2339143-2338652:-	0.73	0.7	0.77	0.83	0.81	0.84	-0.1	1.76682e+06	NA	NA
chr18:215403-215337:-@chr18:215139-215089:-	0.89	0.81	0.95	0.69	0.66	0.73	0.2	3024.6	THOC1	ENSG00000079134
chr18:45272201-45272104:-@chr18:45271952-45271900:-	0.66	0.63	0.68	0.8	0.8	0.81	-0.14	1000000000000	SNORD58	ENSG00000206696
chr19:10259212-10259514:+@chr19:10259662-10260198:+	0.18	0.13	0.23	0.07	0.06	0.08	0.11	82729.5	ICAM4	ENSG00000105371
chr19:10259212-10259514:+@chr19:10259662-10260260:+	0.19	0.14	0.25	0.07	0.06	0.08	0.12	4.20791e+07	ICAM4	ENSG00000105371
chr19:1195314-1195439:+@chr19:1195736-1195823:+	0.37	0.34	0.39	0.25	0.24	0.25	0.12	1000000000000	ATP5D	ENSG00000099624
chr19:1195314-1195439:+@chr19:1195736-1195824:+	0.37	0.35	0.39	0.25	0.24	0.25	0.12	1000000000000	ATP5D	ENSG00000099624
chr19:1828686-1828507:-@chr19:1828424-1827976:-	0.27	0.22	0.31	0.16	0.14	0.18	0.11	3101.16	FAM108A4	ENSG00000129968
chr19:18560805-18560887:+@chr19:18561223-18561493:+	0.34	0.31	0.37	0.66	0.65	0.68	-0.32	1000000000000	C19orf60	ENSG00000006015
chr19:2427354-2427429:+@chr19:2427527-2427628:+	0.68	0.59	0.76	0.45	0.43	0.48	0.23	1.67238e+08	GADD45B	ENSG00000099860
chr19:42418291-42418417:+@chr19:42418721-42418816:+	0.63	0.56	0.7	0.45	0.42	0.48	0.18	4.51885e+06	ZNF383	ENSG00000188283
chr19:43592576-43592435:-@chr19:43591850-43591538:-	0.58	0.56	0.6	0.8	0.79	0.81	-0.22	1000000000000	RASGRP4	ENSG00000171777
chr19:44089879-44090139:+@chr19:44091211-44091374:+	0.45	0.43	0.47	0.65	0.64	0.66	-0.2	1000000000000	NFKBIB	ENSG00000104825
chr19:46580517-46580666:+@chr19:46581306-46581825:+	0.91	0.88	0.94	0.74	0.72	0.76	0.17	1000000000000	TMEM91	ENSG00000221901
chr19:51912224-51912048:-@chr19:51911632-51911228:-	0.71	0.67	0.74	0.87	0.85	0.88	-0.16	1000000000000	PRKD2	ENSG00000105287
chr19:55055337-55055405:+@chr19:55055635-55055802:+	0.6	0.56	0.65	0.49	0.47	0.51	0.11	453.24	PTOV1	ENSG00000104960
chr19:781708-781941:+@chr19:782716-783017:+	0.06	0.06	0.06	0.23	0.23	0.24	-0.17	1000000000000	AZU1	ENSG00000172232
chr2:113659413-113659488:+@chr2:113660009-113660303:+	0.48	0.44	0.52	0.58	0.56	0.6	-0.1	52.91	PSD4	ENSG00000125637
chr2:219807099-219807254:+@chr2:219807792-219808278:+	0.66	0.62	0.69	0.55	0.53	0.56	0.11	1.29658e+08	ANKZF1	ENSG00000163516
chr2:220078424-220078521:+@chr2:220078681-220078727:+	0.32	0.25	0.4	0.2	0.18	0.21	0.12	16.25	GMPPA	ENSG00000144591
chr2:24161589-24161105:-@chr2:24160705-24160563:-	0.79	0.72	0.86	0.66	0.63	0.68	0.13	77.06	TP53I3	ENSG00000115129
chr2:38683682-38683503:-@chr2:38683246-38683084:-	0.5	0.45	0.55	0.31	0.28	0.33	0.19	1000000000000	HNRPLL	ENSG00000143889
chr2:85470772-85470899:+@chr2:85471394-85472380:+	0.32	0.28	0.36	0.22	0.2	0.23	0.1	1000000000000	ELMOD3	ENSG00000115459
chr2:85470772-85470899:+@chr2:85471394-85472386:+	0.32	0.28	0.36	0.22	0.21	0.23	0.1	3.57306e+08	ELMOD3	ENSG00000115459
chr2:88885009-88885079:+@chr2:88885416-88885509:+	0.05	0.02	0.1	0.23	0.18	0.29	-0.18	878581	NA	NA
chr2:88886008-88886037:+@chr2:88886745-88887240:+	0.92	0.83	0.98	0.45	0.4	0.51	0.47	1000000000000	NA	NA
chr2:96869108-96867963:-@chr2:96867552-96867379:-	0.81	0.72	0.91	0.97	0.95	0.99	-0.16	78.17	ANKRD23	ENSG00000163126
chr2:99178468-99178651:+@chr2:99180049-99180521:+	0.97	0.93	0.99	0.84	0.82	0.85	0.13	1000000000000	MRPL30	ENSG00000185414
chr20:11846426-11846659:+@chr20:11846982-11847249:+	0.7	0.65	0.76	0.6	0.57	0.62	0.1	17.15	BTBD3	ENSG00000132640
chr20:32611201-32611370:+@chr20:32611637-32611810:+	0.79	0.75	0.84	0.9	0.88	0.92	-0.11	20071.8	MAP1LC3A	ENSG00000101460
chr20:61797575-61797651:+@chr20:61798557-61798988:+	0.8	0.75	0.85	0.9	0.87	0.92	-0.1	10.99	RTEL1	ENSG00000026036
chr20:61802498-61802398:-@chr20:61802326-61800439:-	0.29	0.24	0.34	0.19	0.17	0.21	0.1	744.67	ARFRP1	ENSG00000101246
chr21:29170684-29170505:-@chr21:29166932-29166384:-	0.41	0.34	0.48	0.29	0.28	0.31	0.12	7.95	HEMK2	ENSG00000156239
chr21:44576325-44576154:-@chr21:44575227-44574774:-	0.68	0.64	0.72	0.55	0.53	0.56	0.13	1000000000000	C21orf2	ENSG00000160226
chr22:16940686-16940813:+@chr22:16941062-16941372:+	0.76	0.72	0.81	0.91	0.9	0.93	-0.15	1000000000000	PEX26	ENSG00000215193
chr22:17822353-17822325:-@chr22:17818267-17818144:-	0.99	0.96	1	0.8	0.75	0.84	0.19	1000000000000	UFD1L	ENSG00000070010
chr22:22509341-22509251:-@chr22:22507119-22506690:-	0.63	0.58	0.67	0.78	0.76	0.81	-0.15	4.95336e+11	DERL3	ENSG00000099958
chr22:34875365-34875253:-@chr22:34875136-34875040:-	0.56	0.51	0.62	0.44	0.39	0.47	0.12	40.41	APOL3	ENSG00000128284
chr22:40519779-40519860:+@chr22:40520321-40520427:+	0.43	0.39	0.47	0.24	0.22	0.25	0.19	1000000000000	MEI1	ENSG00000167077
chr22:44818243-44818107:-@chr22:44817184-44817118:-	0.24	0.2	0.29	0.39	0.37	0.41	-0.15	1000000000000	NA	NA
chr3:103054625-103054768:+@chr3:103055135-103055397:+	0.9	0.89	0.9	1	0.99	1	-0.1	1000000000000	NFKBIZ	ENSG00000144802
chr3:127208758-127208647:-@chr3:127208097-127207890:-	0.71	0.67	0.75	0.81	0.79	0.82	-0.1	17793.7	SLC41A3	ENSG00000114544
chr3:38026770-38026626:-@chr3:38026548-38026399:-	0.39	0.34	0.46	0.59	0.55	0.62	-0.2	1.44162e+08	PLCD1	ENSG00000187091
chr3:41255629-41255849:+@chr3:41256155-41256943:+	0.56	0.55	0.57	0.68	0.67	0.68	-0.12	1000000000000	CTNNB1	ENSG00000168036
chr3:42636160-42636204:+@chr3:42637925-42638012:+	0.8	0.75	0.85	0.9	0.88	0.92	-0.1	23.87	NKTR	ENSG00000114857
chr3:49034078-49034221:+@chr3:49034783-49034975:+	0.44	0.4	0.48	0.34	0.32	0.35	0.1	1.14579e+07	NDUFAF3	ENSG00000178057
chr3:52397474-52397665:+@chr3:52397862-52397993:+	0.6	0.54	0.67	0.45	0.42	0.48	0.15	139.39	DNAH1	ENSG00000114841
chr4:170770353-170769948:-@chr4:170769869-170769746:-	0.14	0.1	0.19	0.33	0.29	0.37	-0.19	1000000000000	NEK1	ENSG00000137601
chr5:34025364-34024973:-@chr5:34024223-34022848:-	0.78	0.72	0.84	0.91	0.9	0.93	-0.13	51928.5	AMACR	ENSG00000082196
chr5:43197108-43197465:+@chr5:43197568-43197790:+	0.42	0.39	0.45	0.56	0.55	0.57	-0.14	1000000000000	ZNF131	ENSG00000172262
chr5:43197108-43197472:+@chr5:43197568-43197790:+	0.69	0.63	0.74	0.79	0.77	0.81	-0.1	12.16	ZNF131	ENSG00000172262
chr5:68652163-68652048:-@chr5:68651928-68651820:-	0.59	0.55	0.63	0.71	0.7	0.73	-0.12	1000000000000	CCDC125	ENSG00000183323
chr6:28347611-28347691:+@chr6:28348426-28348543:+	0.62	0.53	0.7	0.49	0.46	0.52	0.13	5.76	ZNF187	ENSG00000197062
chr6:28347611-28348095:+@chr6:28348426-28348543:+	0.9	0.83	0.96	0.7	0.67	0.74	0.2	136342	ZNF187	ENSG00000197062
chr6:30718524-30718767:+@chr6:30719285-30720411:+	0.98	0.94	1	0.88	0.86	0.91	0.1	1.01022e+07	C6orf134	ENSG00000137343
chr6:30989961-30990100:+@chr6:30990566-30990793:+	0.68	0.59	0.77	0.46	0.43	0.5	0.22	378696	VARSL	ENSG00000137411
chr6:33494043-33493624:-@chr6:33493450-33493236:-	0.37	0.34	0.4	0.53	0.52	0.54	-0.16	1000000000000	CUTA	ENSG00000112514
chr6:33494043-33493714:-@chr6:33493450-33493236:-	0.23	0.21	0.25	0.42	0.42	0.43	-0.19	1000000000000	CUTA	ENSG00000112514
chr6:33494043-33493714:-@chr6:33493571-33493236:-	0.32	0.28	0.36	0.61	0.59	0.63	-0.29	1000000000000	CUTA	ENSG00000112514
chr6:33494043-33493842:-@chr6:33493450-33493236:-	0.17	0.16	0.18	0.27	0.27	0.28	-0.1	1000000000000	CUTA	ENSG00000112514
chr6:52425445-52425594:+@chr6:52426852-52427044:+	0.74	0.69	0.79	0.58	0.56	0.59	0.16	1000000000000	EFHC1	ENSG00000096093
chr7:4795989-4796086:+@chr7:4796371-4796748:+	0.56	0.48	0.64	0.69	0.66	0.72	-0.13	6.07	KIAA0415	ENSG00000164917
chr7:4795989-4796086:+@chr7:4796616-4796748:+	0.35	0.31	0.39	0.55	0.53	0.57	-0.2	1000000000000	KIAA0415	ENSG00000164917
chr7:72281537-72281659:+@chr7:72282123-72282230:+	0.5	0.48	0.51	0.18	0.18	0.19	0.32	1000000000000	NCF1B	ENSG00000182487
chr7:73835218-73835340:+@chr7:73835804-73835911:+	0.35	0.34	0.37	0.11	0.1	0.11	0.24	1000000000000	NCF1	ENSG00000158517
chr7:99055120-99055552:+@chr7:99056932-99057133:+	0.4	0.36	0.44	0.28	0.27	0.3	0.12	1000000000000	ZNF498	ENSG00000197037
chr7:99055120-99055556:+@chr7:99056932-99057133:+	0.5	0.45	0.56	0.35	0.34	0.37	0.15	5.60586e+10	ZNF498	ENSG00000197037
chr8:134558025-134557703:-@chr8:134557499-134557144:-	0.5	0.46	0.54	0.61	0.59	0.63	-0.11	4.14057e+07	ST3GAL1	ENSG00000008513
chr8:134558028-134557703:-@chr8:134557499-134557144:-	0.5	0.46	0.54	0.62	0.6	0.64	-0.12	1000000000000	ST3GAL1	ENSG00000008513
chr8:143743089-143742897:-@chr8:143737358-143735876:-	0.9	0.85	0.95	0.8	0.78	0.83	0.1	12.56	NA	NA
chr8:145388005-145388107:+@chr8:145388175-145388240:+	0.07	0.04	0.11	0.22	0.2	0.25	-0.15	1000000000000	HEATR7A	ENSG00000179832
chr8:145455878-145455980:+@chr8:145456048-145456113:+	0.07	0.03	0.13	0.25	0.22	0.28	-0.18	4.18211e+07	AC110280.8	ENSG00000204771
chr9:102094429-102094539:+@chr9:102095050-102095146:+	0.87	0.82	0.91	0.71	0.68	0.73	0.16	1000000000000	INVS	ENSG00000119509
chr9:109290369-109289397:-@chr9:109289294-109289130:-	0.03	0.02	0.04	0.13	0.13	0.14	-0.1	1000000000000	KLF4	ENSG00000136826
chr9:129981515-129981173:-@chr9:129981004-129980809:-	0.55	0.53	0.57	0.69	0.68	0.7	-0.14	1000000000000	CIZ1	ENSG00000148337
chr9:134776776-134776661:-@chr9:134776321-134776210:-	0.56	0.52	0.61	0.68	0.65	0.7	-0.12	1574.46	TSC1	ENSG00000165699
chr9:35650743-35650855:+@chr9:35650937-35651184:+	0.67	0.62	0.71	0.78	0.76	0.79	-0.11	105123	CCDC107	ENSG00000159884
chr9:35650743-35650855:+@chr9:35650937-35651500:+	0.72	0.68	0.76	0.82	0.81	0.83	-0.1	458314	CCDC107	ENSG00000159884
chrX:133386897-133387026:+@chrX:133387357-133390485:+	0.58	0.52	0.63	0.37	0.35	0.38	0.21	1000000000000	PHF6	ENSG00000156531
chrX:133386897-133387026:+@chrX:133387357-133390488:+	0.58	0.53	0.64	0.37	0.35	0.38	0.21	1000000000000	PHF6	ENSG00000156531
chrX:133733979-133733139:-@chrX:133733050-133731263:-	0.71	0.64	0.78	0.86	0.82	0.89	-0.15	202.69	FAM122B	ENSG00000156504
chrX:48822514-48822440:-@chrX:48821353-48821248:-	0.57	0.52	0.62	0.73	0.71	0.76	-0.16	1000000000000	WDR45	ENSG00000196998
chrX:84388592-84388845:+@chrX:84389209-84389313:+	0.57	0.5	0.64	0.76	0.72	0.79	-0.19	4.92893e+07	ZNF711	ENSG00000147180
chrY:155764-156059:+@chrY:159260-160022:+	0.62	0.61	0.64	0.72	0.7	0.73	-0.1	1000000000000	NA	NA
event_name(SE)	Q157P_posterior_mean	sample1_ci_low	sample1_ci_high	wt_posterior_mean	sample2_ci_low	sample2_ci_high	diff	bayes_factor	proposed_gname	proposed_gname
chr1:109963982:109964423:+@chr1:109965059:109965411:+@chr1:109969448:109969578:+	0.28	0.26	0.31	0.18	0.17	0.18	0.1	1000000000000	AMPD2	ENSG00000116337
chr1:109964799:109965411:+@chr1:109969448:109969578:+@chr1:109969807:109969937:+	0.73	0.7	0.76	0.86	0.85	0.87	-0.13	1000000000000	AMPD2	ENSG00000116337
chr1:109973472:109973635:+@chr1:109973941:109974061:+@chr1:109974378:109974551:+	0.39	0.37	0.41	0.59	0.58	0.6	-0.2	1000000000000	AMPD2	ENSG00000116337
chr1:109973472:109973635:+@chr1:109973945:109974061:+@chr1:109974378:109974551:+	0.3	0.28	0.32	0.42	0.41	0.43	-0.12	1000000000000	AMPD2	ENSG00000116337
chr1:111963928:111964079:+@chr1:111971615:111971708:+@chr1:112035479:112035562:+	0.9	0.86	0.94	0.76	0.73	0.8	0.14	2.57641e+08	RAP1A	ENSG00000116473
chr1:113018977:113019194:+@chr1:113031111:113031251:+@chr1:113033080:113033283:+	0.31	0.28	0.35	0.14	0.13	0.16	0.17	1000000000000	MOV10	ENSG00000155363
chr1:114230682:114230803:-@chr1:114225918:114226142:-@chr1:114220959:114225285:-	0.76	0.71	0.8	0.88	0.85	0.92	-0.12	64.08	C1orf178	ENSG00000188761
chr1:114231394:114231692:-@chr1:114225918:114226142:-@chr1:114220959:114225285:-	0.74	0.69	0.79	0.84	0.79	0.89	-0.1	5.11	C1orf178	ENSG00000188761
chr1:11637501:11637596:+@chr1:11638314:11638343:+@chr1:11638450:11638744:+	0.04	0.01	0.09	0.14	0.11	0.18	-0.1	26.21	FBXO44	ENSG00000132879
chr1:11810750:11810863:+@chr1:11811102:11811268:+@chr1:11811840:11811966:+	0.67	0.62	0.72	0.48	0.45	0.51	0.19	1000000000000	CLCN6	ENSG00000011021
chr1:1198909:1199097:-@chr1:1192976:1193235:-@chr1:1188589:1188629:-	0.75	0.69	0.81	0.9	0.87	0.92	-0.15	54605.7	UBE2J2	ENSG00000160087
chr1:1209221:1209333:+@chr1:1210814:1210907:+@chr1:1211169:1211521:+	0.11	0.05	0.18	0.25	0.21	0.3	-0.14	14.33	SCNN1D	ENSG00000162572
chr1:1318639:1318703:-@chr1:1317922:1318046:-@chr1:1316009:1316108:-	0.83	0.79	0.87	0.73	0.72	0.75	0.1	6.8998e+09	CCNL2	ENSG00000221978
chr1:142535724:142535980:-@chr1:142512568:142512688:-@chr1:142511270:142511478:-	0.53	0.48	0.58	0.35	0.33	0.37	0.18	1000000000000	BX284650.8-1	ENSG00000215863
chr1:143326453:143326660:+@chr1:143328507:143328609:+@chr1:143329439:143329653:+	0.3	0.26	0.34	0.41	0.38	0.43	-0.11	2627.98	NBPF8	ENSG00000186275
chr1:14601:14754:-@chr1:8131:8232:-@chr1:7778:7924:-	0.79	0.77	0.82	0.69	0.68	0.71	0.1	1000000000000	AL627309.15-1	ENSG00000146556
chr1:14601:14754:-@chr1:8776:9002:-@chr1:8131:8229:-	0.76	0.73	0.78	0.66	0.65	0.67	0.1	1000000000000	AL627309.15-1	ENSG00000146556
chr1:14601:14754:-@chr1:8776:9002:-@chr1:8131:8242:-	0.79	0.76	0.81	0.68	0.66	0.69	0.11	1000000000000	AL627309.15-1	ENSG00000146556
chr1:146398348:146398604:-@chr1:146375178:146375298:-@chr1:146373880:146374088:-	0.45	0.4	0.5	0.31	0.29	0.32	0.14	1000000000000	NA	NA
chr1:148515554:148515664:+@chr1:148518675:148518776:+@chr1:148519870:148519951:+	0.39	0.34	0.45	0.77	0.74	0.8	-0.38	1000000000000	C1orf54	ENSG00000118292
chr1:148515554:148515664:+@chr1:148518678:148518776:+@chr1:148519870:148519951:+	0.32	0.27	0.37	0.7	0.67	0.74	-0.38	1000000000000	C1orf54	ENSG00000118292
chr1:148680023:148680123:+@chr1:148680981:148681058:+@chr1:148682331:148682383:+	0.79	0.73	0.84	0.57	0.54	0.6	0.22	1000000000000	RPRD2	ENSG00000163125
chr1:149566371:149566757:-@chr1:149565272:149565473:-@chr1:149554673:149555609:-	0.69	0.66	0.72	0.56	0.55	0.57	0.13	1000000000000	PI4KB	ENSG00000143393
chr1:149681181:149681305:-@chr1:149680028:149680186:-@chr1:149669766:149669941:-	0.82	0.78	0.85	0.69	0.67	0.71	0.13	1000000000000	POGZ	ENSG00000143442
chr1:151897754:151897986:+@chr1:151898238:151898284:+@chr1:151898548:151898666:+	0.76	0.73	0.8	0.87	0.86	0.88	-0.11	3.02683e+08	SNAPIN	ENSG00000143553
chr1:152507857:152508054:+@chr1:152508462:152508512:+@chr1:152509300:152509953:+	0.5	0.43	0.57	0.33	0.31	0.35	0.17	166558	UBAP2L	ENSG00000143569
chr1:153299305:153299443:+@chr1:153299863:153299932:+@chr1:153301345:153301469:+	0.66	0.63	0.7	0.85	0.83	0.86	-0.19	1000000000000	ADAM15	ENSG00000143537
chr1:153299305:153299443:+@chr1:153300518:153300589:+@chr1:153301345:153301469:+	0.23	0.19	0.27	0.43	0.41	0.45	-0.2	1000000000000	ADAM15	ENSG00000143537
chr1:153299863:153299932:+@chr1:153300515:153300589:+@chr1:153301004:153301075:+	0.68	0.59	0.76	0.82	0.79	0.85	-0.14	20.28	ADAM15	ENSG00000143537
chr1:153299863:153299932:+@chr1:153300515:153300589:+@chr1:153301345:153301469:+	0.36	0.32	0.4	0.51	0.49	0.53	-0.15	2.10669e+10	ADAM15	ENSG00000143537
chr1:153299863:153299932:+@chr1:153300518:153300589:+@chr1:153301004:153301075:+	0.65	0.56	0.74	0.82	0.79	0.85	-0.17	52.04	ADAM15	ENSG00000143537
chr1:153299863:153299932:+@chr1:153300518:153300589:+@chr1:153301345:153301469:+	0.33	0.29	0.38	0.51	0.49	0.54	-0.18	1000000000000	ADAM15	ENSG00000143537
chr1:153375399:153375476:+@chr1:153375928:153376051:+@chr1:153376661:153376822:+	0.48	0.44	0.51	0.63	0.61	0.64	-0.15	1000000000000	RAG1AP1	ENSG00000169241
chr1:153446963:153447042:+@chr1:153448542:153448634:+@chr1:153448800:153448982:+	0.63	0.6	0.65	0.86	0.84	0.87	-0.23	1000000000000	MTX1	ENSG00000173171
chr1:153848597:153848731:+@chr1:153848833:153848985:+@chr1:153849259:153849390:+	0.82	0.77	0.88	0.71	0.68	0.73	0.11	74.43	MSTO1	ENSG00000125459
chr1:154531941:154532073:-@chr1:154531174:154531431:-@chr1:154530780:154530980:-	0.92	0.88	0.96	0.67	0.65	0.69	0.25	1000000000000	C1orf85	ENSG00000198715
chr1:156529010:156529288:+@chr1:156529626:156529716:+@chr1:156529869:156531188:+	0.77	0.72	0.82	0.65	0.63	0.67	0.12	17810	CD1C	ENSG00000158481
chr1:159050834:159051175:+@chr1:159053008:159053277:+@chr1:159054632:159054733:+	0.67	0.62	0.72	0.43	0.38	0.47	0.24	1000000000000	LY9	ENSG00000122224
chr1:159059879:159060210:+@chr1:159060595:159060663:+@chr1:159064162:159064669:+	0.91	0.88	0.94	0.79	0.74	0.83	0.12	4508.16	LY9	ENSG00000122224
chr1:159059879:159060210:+@chr1:159060595:159060666:+@chr1:159064162:159064669:+	0.76	0.69	0.82	0.6	0.53	0.66	0.16	51.13	LY9	ENSG00000122224
chr1:15918816:15919002:+@chr1:15920411:15920470:+@chr1:15924399:15924627:+	0.26	0.24	0.28	0.36	0.35	0.37	-0.1	1000000000000	PLEKHM2	ENSG00000116786
chr1:159275294:159275404:-@chr1:159274965:159275087:-@chr1:159274327:159274489:-	0.54	0.51	0.57	0.74	0.72	0.75	-0.2	1000000000000	RP11-544M22.4	ENSG00000215845
chr1:159275294:159275404:-@chr1:159274965:159275108:-@chr1:159274327:159274489:-	0.39	0.36	0.42	0.57	0.56	0.59	-0.18	1000000000000	RP11-544M22.4	ENSG00000215845
chr1:160826737:160826925:+@chr1:160829146:160829196:+@chr1:160834206:160834272:+	0	0	0.01	0.1	0.09	0.12	-0.1	1000000000000	UAP1	ENSG00000117143
chr1:1637645:1637777:-@chr1:1567571:1567732:-@chr1:1567130:1567225:-	0.86	0.81	0.92	0.96	0.95	0.98	-0.1	39.85	RP11-345P4.4	ENSG00000189339
chr1:166001444:166001610:+@chr1:166009097:166009229:+@chr1:166023681:166026684:+	0.9	0.81	0.97	0.75	0.73	0.77	0.15	7.66	MPZL1	ENSG00000197965
chr1:1667023:1667291:-@chr1:1665550:1665967:-@chr1:1660535:1661003:-	0.4	0.37	0.43	0.5	0.48	0.52	-0.1	8.92665e+11	SLC35E2	ENSG00000215790
chr1:168034622:168034723:+@chr1:168036648:168036736:+@chr1:168038386:168038490:+	0.86	0.8	0.92	0.97	0.95	0.98	-0.11	54819.6	C1orf112	ENSG00000000460
chr1:173047593:173047721:+@chr1:173113153:173113366:+@chr1:173193217:173193309:+	0.3	0.27	0.33	0.13	0.12	0.14	0.17	1000000000000	RP1-102G20.2	ENSG00000219579
chr1:179285770:179286045:+@chr1:179287994:179288269:+@chr1:179289332:179289436:+	0.1	0.08	0.11	0.25	0.24	0.26	-0.15	1000000000000	MR1	ENSG00000153029
chr1:183542769:183542894:-@chr1:183542240:183542380:-@chr1:183541291:183541398:-	0.82	0.81	0.84	0.57	0.56	0.58	0.25	1000000000000	IVNS1ABP	ENSG00000116679
chr1:191295376:191295529:+@chr1:191304787:191305387:+@chr1:191311573:191311793:+	0.73	0.69	0.76	0.55	0.53	0.56	0.18	1000000000000	TROVE2	ENSG00000116747
chr1:195887988:195888068:-@chr1:195882808:195882867:-@chr1:195881443:195881496:-	0.1	0.06	0.15	0.22	0.19	0.25	-0.12	193.12	AL139136.17	ENSG00000213047
chr1:199220610:199220723:-@chr1:199218807:199218845:-@chr1:199216711:199216847:-	0.34	0.3	0.39	0.23	0.2	0.26	0.11	53888.2	KIF21B	ENSG00000116852
chr1:201129935:201130033:-@chr1:201128990:201129176:-@chr1:201126853:201128410:-	0.79	0.76	0.83	0.69	0.67	0.71	0.1	2.27255e+06	KLHL12	ENSG00000117153
chr1:201416913:201417036:-@chr1:201416221:201416403:-@chr1:201415512:201415628:-	0.77	0.76	0.79	0.9	0.86	0.94	-0.13	1.14851e+07	CHI3L1	ENSG00000133048
chr1:201454967:201455080:-@chr1:201453686:201453842:-@chr1:201453490:201453616:-	0.08	0.07	0.1	0.19	0.13	0.26	-0.11	31.05	CHIT1	ENSG00000133063
chr1:202031411:202031545:+@chr1:202032044:202032247:+@chr1:202037326:202037379:+	0.75	0.73	0.78	0.51	0.5	0.53	0.24	1000000000000	ZC3H11A	ENSG00000058673
chr1:202031411:202031545:+@chr1:202032044:202032352:+@chr1:202037326:202037379:+	0.73	0.7	0.76	0.48	0.46	0.49	0.25	1000000000000	ZC3H11A	ENSG00000058673
chr1:202767942:202767997:+@chr1:202773181:202773248:+@chr1:202773960:202774059:+	0.63	0.6	0.67	0.74	0.73	0.76	-0.11	1000000000000	MDM4	ENSG00000198625
chr1:202767942:202767997:+@chr1:202773210:202773248:+@chr1:202773960:202774059:+	0.57	0.54	0.61	0.67	0.65	0.69	-0.1	17043	MDM4	ENSG00000198625
chr1:203386431:203386545:-@chr1:203383956:203384090:-@chr1:203378255:203383496:-	0.69	0.65	0.73	0.49	0.47	0.52	0.2	1000000000000	DSTYK	ENSG00000133059
chr1:204732979:204733075:+@chr1:204733222:204733334:+@chr1:204733876:204733947:+	0.69	0.63	0.75	0.91	0.89	0.93	-0.22	1000000000000	IKBKE	ENSG00000143466
chr1:206006981:206007163:+@chr1:206007747:206007791:+@chr1:206010289:206010330:+	0.66	0.62	0.7	0.78	0.77	0.8	-0.12	1000000000000	CD46	ENSG00000117335
chr1:206006981:206007163:+@chr1:206007747:206007791:+@chr1:206023260:206023298:+	0.74	0.67	0.81	0.86	0.82	0.9	-0.12	5.2	CD46	ENSG00000117335
chr1:206006981:206007163:+@chr1:206010289:206010330:+@chr1:206023260:206023298:+	0.49	0.43	0.54	0.31	0.29	0.34	0.18	1000000000000	CD46	ENSG00000117335
chr1:206025587:206025650:+@chr1:206030221:206030313:+@chr1:206033487:206035481:+	0.4	0.38	0.42	0.5	0.49	0.51	-0.1	1000000000000	CD46	ENSG00000117335
chr1:208019283:208019342:+@chr1:208020438:208020574:+@chr1:208021313:208021426:+	0.7	0.64	0.76	0.8	0.78	0.82	-0.1	11.83	TRAF3IP3	ENSG00000009790
chr1:217419112:217419211:+@chr1:217433047:217433216:+@chr1:217450497:217450612:+	0.75	0.68	0.82	0.91	0.9	0.93	-0.16	99309.9	LYPLAL1	ENSG00000143353
chr1:217419112:217419211:+@chr1:217433095:217433216:+@chr1:217450497:217450612:+	0.73	0.65	0.8	0.9	0.89	0.92	-0.17	1.63721e+07	LYPLAL1	ENSG00000143353
chr1:226363473:226363636:-@chr1:226363279:226363345:-@chr1:226362559:226362642:-	0.54	0.46	0.62	0.73	0.71	0.75	-0.19	683.33	MRPL55	ENSG00000162910
chr1:230617863:230617994:-@chr1:230606494:230606547:-@chr1:230605817:230605940:-	0.14	0.08	0.22	0.02	0.01	0.03	0.12	396.27	SIPA1L2	ENSG00000116991
chr1:23367846:23368104:-@chr1:23308665:23308730:-@chr1:23308102:23308207:-	0.64	0.61	0.68	0.46	0.44	0.47	0.18	1000000000000	LUZP1	ENSG00000169641
chr1:239869807:239870324:-@chr1:239834345:239834504:-@chr1:239827671:239827922:-	0.57	0.51	0.62	0.45	0.43	0.47	0.12	271.77	OPN3	ENSG00000054277
chr1:240078656:240078952:+@chr1:240079037:240079141:+@chr1:240080334:240080511:+	0.27	0.22	0.32	0.44	0.4	0.47	-0.17	1000000000000	EXO1	ENSG00000174371
chr1:240080334:240080511:+@chr1:240082217:240082336:+@chr1:240083283:240083406:+	0.71	0.64	0.79	0.85	0.82	0.88	-0.14	33.92	EXO1	ENSG00000174371
chr1:24170927:24171089:-@chr1:24170650:24170700:-@chr1:24165524:24166800:-	0.86	0.83	0.88	0.73	0.72	0.75	0.13	1000000000000	FUSIP1	ENSG00000188529
chr1:242681560:242682036:-@chr1:242679915:242680096:-@chr1:242667591:242667693:-	0.24	0.21	0.26	0.13	0.12	0.15	0.11	1000000000000	ADSS	ENSG00000035687
chr1:243065262:243065681:+@chr1:243071869:243071983:+@chr1:243072120:243072183:+	0.26	0.22	0.3	0.36	0.34	0.38	-0.1	6.16095e+07	BX323046.3-2	ENSG00000215797
chr1:243200254:243200368:+@chr1:243247167:243247251:+@chr1:243289311:243289383:+	0.86	0.78	0.93	0.67	0.64	0.7	0.19	49.32	AL589763.6-1	ENSG00000208060
chr1:244821437:244821866:+@chr1:244851354:244851559:+@chr1:244861819:244861849:+	0.81	0.77	0.86	0.59	0.57	0.6	0.22	1000000000000	C1orf71	ENSG00000162852
chr1:245083016:245083224:-@chr1:245081830:245081963:-@chr1:245079540:245081367:-	0.26	0.23	0.3	0.15	0.13	0.16	0.11	1000000000000	AHCTF1	ENSG00000153207
chr1:24600396:24600533:-@chr1:24590638:24590756:-@chr1:24582979:24583080:-	0.95	0.88	0.99	0.81	0.76	0.85	0.14	15.86	C1orf201	ENSG00000001460
chr1:24713391:24713644:+@chr1:24730295:24730468:+@chr1:24734170:24736097:+	0.97	0.89	1	0.83	0.79	0.87	0.14	150.13	RCAN3	ENSG00000117602
chr1:26310913:26310993:+@chr1:26311538:26311728:+@chr1:26313370:26313671:+	0.43	0.36	0.51	0.26	0.23	0.29	0.17	6.96262e+06	PDIK1L	ENSG00000175087
chr1:26505670:26505782:-@chr1:26502121:26502245:-@chr1:26501891:26501996:-	0.28	0.23	0.33	0.16	0.14	0.17	0.12	5.45133e+09	UBXN11	ENSG00000158062
chr1:27757804:27757981:-@chr1:27757403:27757628:-@chr1:27752172:27752388:-	0.96	0.9	1	0.84	0.8	0.88	0.12	18.52	AHDC1	ENSG00000126705
chr1:28199058:28199147:-@chr1:28197382:28197449:-@chr1:28196418:28196476:-	0.26	0.22	0.31	0.42	0.39	0.46	-0.16	1000000000000	EYA3	ENSG00000158161
chr1:28705042:28705183:+@chr1:28705319:28705426:+@chr1:28707227:28707259:+	0.07	0.04	0.11	0.29	0.25	0.33	-0.22	1000000000000	SNORA73	ENSG00000201808
chr1:28728957:28729038:+@chr1:28729622:28729672:+@chr1:28730902:28731089:+	0.22	0.19	0.25	0.35	0.33	0.36	-0.13	1000000000000	RCC1	ENSG00000180198
chr1:3403657:3403785:-@chr1:3403412:3403543:-@chr1:3403079:3403207:-	0.3	0.26	0.34	0.72	0.7	0.75	-0.42	1000000000000	MEGF6	ENSG00000162591
chr1:39673817:39674020:+@chr1:39674741:39674749:+@chr1:39676036:39676267:+	0.02	0	0.03	0.37	0.34	0.4	-0.35	1000000000000	MACF1	ENSG00000127603
chr1:41004855:41004962:+@chr1:41005177:41005233:+@chr1:41007615:41007674:+	0.38	0.34	0.42	0.27	0.25	0.29	0.11	1.44648e+06	NFYC	ENSG00000066136
chr1:41275621:41275800:-@chr1:41272242:41272307:-@chr1:41266843:41266985:-	0.78	0.74	0.81	0.66	0.63	0.68	0.12	1000000000000	SCMH1	ENSG00000010803
chr1:41399134:41399157:-@chr1:41389873:41389943:-@chr1:41381137:41381371:-	0.84	0.78	0.89	0.71	0.67	0.74	0.13	497.74	SCMH1	ENSG00000010803
chr1:41399134:41399157:-@chr1:41397984:41398192:-@chr1:41381137:41381371:-	0.48	0.44	0.52	0.33	0.31	0.35	0.15	1000000000000	SCMH1	ENSG00000010803
chr1:43055363:43055511:+@chr1:43062806:43063010:+@chr1:43063881:43063996:+	0.2	0.15	0.27	0.1	0.09	0.11	0.1	26.86	ERMAP	ENSG00000164010
chr1:43691671:43691755:-@chr1:43691161:43691262:-@chr1:43690463:43690577:-	0.44	0.34	0.53	0.24	0.2	0.28	0.2	183.29	HYI	ENSG00000178922
chr1:44137427:44137522:+@chr1:44137768:44137986:+@chr1:44158663:44158809:+	0.87	0.8	0.93	0.74	0.71	0.78	0.13	12.43	ST3GAL3	ENSG00000126091
chr1:45734815:45734882:-@chr1:45733677:45733804:-@chr1:45733168:45733425:-	0.93	0.85	0.98	0.69	0.59	0.78	0.24	20.16	NA	NA
chr1:45789085:45789414:+@chr1:45790695:45790822:+@chr1:45800048:45800137:+	0.41	0.39	0.43	0.26	0.25	0.27	0.15	1000000000000	AKR1A1	ENSG00000117448
chr1:46578436:46579178:+@chr1:46579582:46579756:+@chr1:46583060:46583403:+	0.47	0.42	0.52	0.34	0.32	0.36	0.13	17040.2	AL122001.32-3	ENSG00000215890
chr1:46583060:46583221:+@chr1:46585180:46585334:+@chr1:46591127:46591287:+	0.53	0.45	0.61	0.7	0.66	0.74	-0.17	758.66	AL122001.32-3	ENSG00000215890
chr1:46583060:46583403:+@chr1:46585180:46585334:+@chr1:46591127:46591287:+	0.42	0.37	0.46	0.56	0.54	0.59	-0.14	1.31089e+10	AL122001.32-3	ENSG00000215890
chr1:46799737:46799901:-@chr1:46798493:46798536:-@chr1:46795677:46797059:-	0.42	0.39	0.44	0.59	0.58	0.61	-0.17	1000000000000	MKNK1	ENSG00000079277
chr1:47552295:47552406:-@chr1:47551207:47551415:-@chr1:47548535:47548621:-	0.06	0.03	0.09	0.16	0.13	0.19	-0.1	184140	STIL	ENSG00000123473
chr1:51988405:51988455:+@chr1:51994580:51994618:+@chr1:51998950:51999040:+	0.65	0.6	0.69	0.49	0.47	0.51	0.16	1000000000000	OSBPL9	ENSG00000117859
chr1:53146128:53146214:-@chr1:53144779:53144871:-@chr1:53143294:53143350:-	0.51	0.43	0.59	0.65	0.61	0.69	-0.14	9.18	ECHDC2	ENSG00000121310
chr1:53488950:53489122:-@chr1:53487640:53487816:-@chr1:53483800:53485316:-	0.45	0.4	0.49	0.2	0.19	0.22	0.25	1000000000000	LRP8	ENSG00000157193
chr1:53518847:53518975:-@chr1:53514952:53515338:-@chr1:53513891:53514013:-	0.32	0.27	0.38	0.18	0.16	0.2	0.14	2.62793e+10	LRP8	ENSG00000157193
chr1:54098317:54098414:-@chr1:54093262:54093312:-@chr1:54089994:54090531:-	0.76	0.7	0.82	0.57	0.55	0.6	0.19	1000000000000	YIPF1	ENSG00000058799
chr1:54127974:54128041:-@chr1:54127505:54127724:-@chr1:54127168:54127247:-	0.53	0.46	0.61	0.39	0.37	0.42	0.14	17.56	YIPF1	ENSG00000058799
chr1:54822916:54823123:+@chr1:54824096:54824165:+@chr1:54830807:54830867:+	0.6	0.51	0.7	0.87	0.82	0.9	-0.27	2.43973e+09	ACOT11	ENSG00000162390
chr1:6767971:6768222:+@chr1:6802828:6802897:+@chr1:6807739:6807857:+	0.7	0.67	0.73	0.81	0.8	0.82	-0.11	1000000000000	CAMTA1	ENSG00000171735
chr1:67923471:67923809:+@chr1:67924296:67924397:+@chr1:67925932:67926607:+	0.58	0.56	0.6	0.7	0.67	0.72	-0.12	1000000000000	GADD45A	ENSG00000116717
chr1:67923471:67923809:+@chr1:67924621:67924858:+@chr1:67925932:67926607:+	0.6	0.58	0.61	0.73	0.72	0.75	-0.13	1000000000000	GADD45A	ENSG00000116717
chr1:67924296:67924397:+@chr1:67924621:67924858:+@chr1:67925932:67926607:+	0.66	0.65	0.68	0.84	0.82	0.86	-0.18	1000000000000	GADD45A	ENSG00000116717
chr1:68722221:68722361:-@chr1:68720317:68721168:-@chr1:68719711:68719883:-	0.47	0.4	0.54	0.27	0.24	0.31	0.2	2.65675e+09	DEPDC1	ENSG00000024526
chr1:68722221:68722361:-@chr1:68720912:68721168:-@chr1:68719711:68719883:-	0.36	0.29	0.43	0.19	0.16	0.23	0.17	1.01277e+06	DEPDC1	ENSG00000024526
chr1:71305047:71305205:-@chr1:71303949:71304023:-@chr1:71301562:71303408:-	0.5	0.48	0.52	0.62	0.61	0.63	-0.12	1000000000000	ZRANB2	ENSG00000132485
chr1:74948370:74948519:-@chr1:74945375:74945476:-@chr1:74945171:74945266:-	0.57	0.5	0.65	0.79	0.77	0.81	-0.22	1000000000000	CRYZ	ENSG00000116791
chr1:86597058:86597162:-@chr1:86594715:86594873:-@chr1:86593045:86593130:-	0.57	0.52	0.62	0.81	0.79	0.83	-0.24	1000000000000	ODF2L	ENSG00000122417
chr1:86621202:86621273:-@chr1:86620513:86620629:-@chr1:86614504:86614689:-	0.72	0.67	0.76	0.9	0.88	0.92	-0.18	1000000000000	ODF2L	ENSG00000122417
chr1:89024375:89024484:+@chr1:89042662:89042805:+@chr1:89043117:89043192:+	0.71	0.67	0.75	0.86	0.84	0.88	-0.15	1000000000000	PKN2	ENSG00000065243
chr1:91753939:91754021:+@chr1:91758275:91758424:+@chr1:91762186:91763902:+	0.81	0.75	0.86	0.91	0.88	0.92	-0.1	9.46	CDC7	ENSG00000097046
chr1:92506058:92506147:-@chr1:92504845:92504886:-@chr1:92504564:92504637:-	0.86	0.77	0.93	0.71	0.68	0.75	0.15	7.79	GLMN	ENSG00000174842
chr1:93365377:93365444:+@chr1:93367423:93367593:+@chr1:93371848:93371953:+	0.76	0.72	0.79	0.63	0.61	0.65	0.13	1000000000000	MTF2	ENSG00000143033
chr1:94779681:94779903:-@chr1:94778716:94779210:-@chr1:94778401:94778512:-	0.46	0.44	0.49	0.31	0.28	0.33	0.15	1000000000000	F3	ENSG00000117525
chr1:97042929:97043083:+@chr1:97044563:97044596:+@chr1:97045010:97045102:+	0.28	0.23	0.34	0.16	0.14	0.18	0.12	1774.95	PTBP2	ENSG00000117569
chr1_random:1506012:1506174:-@chr1_random:1505735:1505785:-@chr1_random:1500602:1501878:-	0.85	0.83	0.88	0.73	0.72	0.75	0.12	1000000000000	NA	NA
chr10:100180318:100180417:-@chr10:100179538:100179636:-@chr10:100179320:100179389:-	0.61	0.58	0.65	0.75	0.73	0.76	-0.14	1000000000000	HPS1	ENSG00000107521
chr10:102252001:102252231:-@chr10:102249857:102249906:-@chr10:102249271:102249345:-	0.38	0.33	0.42	0.51	0.49	0.53	-0.13	3.41119e+07	SEC31B	ENSG00000075826
chr10:102257655:102257798:-@chr10:102257172:102257314:-@chr10:102256068:102256167:-	0.68	0.63	0.72	0.81	0.79	0.83	-0.13	1000000000000	SEC31B	ENSG00000075826
chr10:102736496:102736722:-@chr10:102733695:102733821:-@chr10:102733502:102733564:-	0.25	0.22	0.29	0.1	0.1	0.11	0.15	1000000000000	MRPL43	ENSG00000055950
chr10:104219740:104219822:+@chr10:104220412:104220864:+@chr10:104221020:104221143:+	0.89	0.79	0.96	0.6	0.55	0.65	0.29	1000000000000	TMEM180	ENSG00000138111
chr10:104478178:104478276:+@chr10:104479066:104479141:+@chr10:104479470:104479555:+	0.84	0.77	0.91	0.71	0.67	0.75	0.13	6.34	SFXN2	ENSG00000156398
chr10:104818376:104818469:+@chr10:104821521:104821586:+@chr10:104825833:104826017:+	0.18	0.11	0.28	0.06	0.04	0.08	0.12	29.21	CNNM2	ENSG00000148842
chr10:104855453:104855548:-@chr10:104855105:104855128:-@chr10:104850982:104851073:-	0.57	0.54	0.59	0.46	0.45	0.48	0.11	1000000000000	NT5C2	ENSG00000076685
chr10:120911842:120911916:-@chr10:120910557:120910583:-@chr10:120910417:120910471:-	0.62	0.55	0.69	0.9	0.88	0.92	-0.28	1000000000000	SFXN4	ENSG00000183605
chr10:121331424:121331511:-@chr10:121329973:121330348:-@chr10:121329437:121329512:-	0.22	0.2	0.24	0.47	0.46	0.49	-0.25	1000000000000	TIAL1	ENSG00000151923
chr10:129804745:129804790:-@chr10:129803182:129804261:-@chr10:129801681:129801856:-	0.93	0.9	0.96	0.77	0.73	0.81	0.16	1000000000000	MKI67	ENSG00000148773
chr10:134001059:134001189:+@chr10:134005707:134005765:+@chr10:134007992:134008144:+	0.75	0.65	0.85	0.51	0.47	0.54	0.24	5.62291e+07	LRRC27	ENSG00000148814
chr10:134011478:134011850:+@chr10:134012457:134012551:+@chr10:134015101:134015247:+	0.63	0.55	0.71	0.23	0.21	0.25	0.4	1000000000000	LRRC27	ENSG00000148814
chr10:14686245:14686423:-@chr10:14635327:14635392:-@chr10:14612337:14612520:-	0.69	0.66	0.73	0.51	0.49	0.54	0.18	1000000000000	FAM107B	ENSG00000065809
chr10:15021815:15021874:-@chr10:15018543:15018598:-@chr10:15017468:15017569:-	0.79	0.73	0.85	0.95	0.93	0.96	-0.16	8.43205e+10	DCLRE1C	ENSG00000152457
chr10:15031041:15031092:-@chr10:15029530:15029614:-@chr10:15027110:15027194:-	0.15	0.11	0.2	0.29	0.27	0.32	-0.14	3.52142e+10	DCLRE1C	ENSG00000152457
chr10:15923431:15923604:-@chr10:15920233:15920284:-@chr10:15919209:15919323:-	0.2	0.16	0.24	0.41	0.39	0.44	-0.21	1000000000000	C10orf97	ENSG00000148481
chr10:16899320:16899459:-@chr10:16898978:16899089:-@chr10:16864039:16864089:-	0.59	0.56	0.62	0.76	0.75	0.78	-0.17	1000000000000	RSU1	ENSG00000148484
chr10:21867768:21867847:+@chr10:21886556:21886759:+@chr10:21915229:21915283:+	0.29	0.23	0.35	0.19	0.18	0.21	0.1	17.32	MLLT10	ENSG00000078403
chr10:22010267:22010311:+@chr10:22011160:22011192:+@chr10:22042707:22042885:+	0.59	0.51	0.68	0.74	0.71	0.78	-0.15	48.08	MLLT10	ENSG00000078403
chr10:22011160:22011192:+@chr10:22017426:22017473:+@chr10:22042707:22042885:+	0.18	0.13	0.23	0.31	0.28	0.33	-0.13	149.4	MLLT10	ENSG00000078403
chr10:27552273:27552387:-@chr10:27552142:27552174:-@chr10:27548658:27548792:-	0.41	0.35	0.47	0.53	0.5	0.55	-0.12	91.77	ACBD5	ENSG00000107897
chr10:35455775:35456127:+@chr10:35466716:35466813:+@chr10:35477302:35477425:+	0.21	0.15	0.28	0.05	0.04	0.07	0.16	895.6	CREM	ENSG00000095794
chr10:3813833:3814406:-@chr10:3812298:3812421:-@chr10:3808188:3811782:-	0.82	0.81	0.82	0.72	0.71	0.73	0.1	1000000000000	COPEB	ENSG00000067082
chr10:42447383:42447478:-@chr10:42429736:42429812:-@chr10:42404561:42410153:-	0.39	0.32	0.46	0.27	0.25	0.29	0.12	43.4	ZNF33B	ENSG00000196693
chr10:45259182:45259282:+@chr10:45259570:45259740:+@chr10:45260962:45261573:+	0.76	0.73	0.79	0.87	0.86	0.88	-0.11	1000000000000	AL731567.6	ENSG00000215136
chr10:45279693:45279781:-@chr10:45278605:45279450:-@chr10:45276685:45276865:-	0.35	0.32	0.38	0.08	0.08	0.09	0.27	1000000000000	MARCH8	ENSG00000165406
chr10:45600275:45600355:+@chr10:45600963:45601085:+@chr10:45602489:45602701:+	0.75	0.71	0.79	0.62	0.61	0.64	0.13	1.60351e+09	FAM21C	ENSG00000172661
chr10:51031733:51031916:-@chr10:50800599:50800721:-@chr10:50800388:50800471:-	0.45	0.37	0.53	0.63	0.59	0.68	-0.18	60.68	FAM25E	ENSG00000214986
chr10:5972988:5973085:+@chr10:5977022:5977156:+@chr10:5984989:5985144:+	0.6	0.51	0.7	0.44	0.4	0.49	0.16	7.99	FBXO18	ENSG00000134452
chr10:6538642:6538780:-@chr10:6523861:6524049:-@chr10:6512778:6512906:-	0.65	0.59	0.72	0.77	0.75	0.79	-0.12	11.9	PRKCQ	ENSG00000065675
chr10:74476689:74476865:-@chr10:74473651:74473721:-@chr10:74460031:74460134:-	0.83	0.78	0.87	0.93	0.91	0.94	-0.1	138087	P4HA1	ENSG00000122884
chr10:74476689:74476865:-@chr10:74474745:74474815:-@chr10:74460031:74460134:-	0.8	0.75	0.84	0.91	0.89	0.92	-0.11	1.25748e+07	P4HA1	ENSG00000122884
chr10:75249296:75249409:-@chr10:75247973:75248659:-@chr10:75247243:75247318:-	0.56	0.48	0.63	0.4	0.38	0.43	0.16	168.02	CAMK2G	ENSG00000148660
chr10:89517410:89517460:-@chr10:89509438:89509524:-@chr10:89506526:89506659:-	0.32	0.26	0.38	0.22	0.2	0.24	0.1	11.79	AFDC1	ENSG00000138138
chr10:92644512:92644628:+@chr10:92645191:92645220:+@chr10:92645617:92645654:+	0.31	0.26	0.38	0.5	0.47	0.53	-0.19	86684.6	RPP30	ENSG00000148688
chr10:99203277:99203410:+@chr10:99203546:99203593:+@chr10:99204461:99204546:+	0.61	0.55	0.66	0.75	0.73	0.77	-0.14	44400.3	ZDHHC16	ENSG00000171307
chr10:99502785:99502929:+@chr10:99504474:99504605:+@chr10:99507012:99507058:+	0.23	0.19	0.28	0.09	0.08	0.1	0.14	1000000000000	ZFYVE27	ENSG00000155256
chr11:104410145:104410411:-@chr11:104409001:104409063:-@chr11:104407102:104407217:-	0.64	0.6	0.67	0.78	0.77	0.79	-0.14	1000000000000	CASP1	ENSG00000137752
chr11:104420329:104420595:-@chr11:104419420:104419482:-@chr11:104417263:104417656:-	0.64	0.61	0.67	0.53	0.52	0.54	0.11	1000000000000	CARD16	ENSG00000204397
chr11:105453249:105453396:-@chr11:105452444:105452644:-@chr11:105434802:105435046:-	0.77	0.69	0.84	0.59	0.56	0.63	0.18	555.47	KBTBD3	ENSG00000182359
chr11:105453249:105453396:-@chr11:105452444:105452645:-@chr11:105434802:105435046:-	0.72	0.62	0.81	0.52	0.48	0.56	0.2	107.22	KBTBD3	ENSG00000182359
chr11:111604527:111604606:+@chr11:111606141:111606163:+@chr11:111606559:111606615:+	0.21	0.17	0.26	0.34	0.32	0.37	-0.13	62136.1	PTS	ENSG00000150787
chr11:116703814:116704134:+@chr11:116711531:116711606:+@chr11:116714492:116714594:+	0.92	0.85	0.97	0.71	0.68	0.74	0.21	1000000000000	CEP164	ENSG00000110274
chr11:116738330:116738464:+@chr11:116739355:116739432:+@chr11:116747006:116747392:+	0.35	0.29	0.41	0.54	0.51	0.57	-0.19	1.54734e+09	CEP164	ENSG00000110274
chr11:117812415:117812869:+@chr11:117814949:117815047:+@chr11:117844700:117844769:+	0.69	0.61	0.75	0.87	0.84	0.89	-0.18	1.93497e+06	AP001267.4-2	ENSG00000167279
chr11:117857640:117858017:+@chr11:117858347:117858420:+@chr11:117860108:117860239:+	0.93	0.9	0.94	0.83	0.8	0.85	0.1	1000000000000	MLL	ENSG00000118058
chr11:117860108:117860239:+@chr11:117860787:117860900:+@chr11:117864539:117864685:+	0.86	0.83	0.89	0.75	0.72	0.78	0.11	5.63649e+06	MLL	ENSG00000118058
chr11:11819546:11820347:+@chr11:11851923:11851982:+@chr11:11858300:11858503:+	0.41	0.36	0.46	0.27	0.25	0.3	0.14	1.83377e+08	USP47	ENSG00000170242
chr11:124000777:124001009:+@chr11:124001579:124001715:+@chr11:124002010:124002156:+	0.37	0.34	0.41	0.25	0.24	0.27	0.12	1000000000000	TBRG1	ENSG00000154144
chr11:129497410:129497618:+@chr11:129498717:129498884:+@chr11:129501805:129501935:+	0.42	0.41	0.43	0.64	0.64	0.65	-0.22	1000000000000	APLP2	ENSG00000084234
chr11:129510668:129510820:+@chr11:129512361:129512396:+@chr11:129515503:129515588:+	0.18	0.17	0.19	0.33	0.33	0.34	-0.15	1000000000000	APLP2	ENSG00000084234
chr11:129612115:129612198:-@chr11:129609261:129609378:-@chr11:129608413:129608487:-	0.63	0.56	0.7	0.79	0.76	0.82	-0.16	674.03	ZBTB44	ENSG00000196323
chr11:133631652:133631752:+@chr11:133632192:133632361:+@chr11:133633619:133633728:+	0.93	0.89	0.96	0.74	0.72	0.77	0.19	1000000000000	ACAD8	ENSG00000151498
chr11:13441215:13441414:-@chr11:13423147:13423276:-@chr11:13399765:13399961:-	0.31	0.25	0.36	0.19	0.17	0.21	0.12	42.02	BTBD10	ENSG00000148925
chr11:13441215:13441414:-@chr11:13423147:13423304:-@chr11:13399765:13399961:-	0.39	0.34	0.46	0.25	0.23	0.27	0.14	11917.9	BTBD10	ENSG00000148925
chr11:18300069:18300297:-@chr11:18295874:18296030:-@chr11:18290037:18290147:-	0.72	0.65	0.79	0.6	0.56	0.64	0.12	5.78	HPS5	ENSG00000110756
chr11:28274876:28275054:+@chr11:28306218:28306288:+@chr11:28308519:28311630:+	0.05	0.02	0.1	0.23	0.19	0.27	-0.18	1000000000000	METT5D1	ENSG00000169519
chr11:3099803:3099904:-@chr11:3098227:3098430:-@chr11:3097353:3097437:-	0.75	0.71	0.79	0.95	0.94	0.96	-0.2	1000000000000	OSBPL5	ENSG00000021762
chr11:33325974:33326135:+@chr11:33326288:33326350:+@chr11:33326644:33326940:+	0.49	0.46	0.52	0.62	0.6	0.64	-0.13	1000000000000	HIPK3	ENSG00000110422
chr11:3348781:3348876:-@chr11:3340352:3340408:-@chr11:3335733:3338371:-	0.45	0.38	0.52	0.21	0.19	0.23	0.24	1000000000000	ZNF195	ENSG00000005801
chr11:3356844:3357028:-@chr11:3355423:3355608:-@chr11:3349383:3349509:-	0.33	0.27	0.39	0.21	0.2	0.24	0.12	21.71	ZNF195	ENSG00000005801
chr11:3356844:3357028:-@chr11:3355423:3355608:-@chr11:3351383:3351462:-	0.43	0.35	0.51	0.27	0.25	0.3	0.16	29.46	ZNF195	ENSG00000005801
chr11:3356844:3357028:-@chr11:3355423:3355706:-@chr11:3349383:3349509:-	0.57	0.51	0.63	0.42	0.4	0.44	0.15	6695.9	ZNF195	ENSG00000005801
chr11:3356844:3357028:-@chr11:3355423:3355706:-@chr11:3351383:3351462:-	0.63	0.57	0.7	0.49	0.46	0.51	0.14	6103.62	ZNF195	ENSG00000005801
chr11:34894351:34894515:-@chr11:34873133:34873233:-@chr11:34868627:34868675:-	0.72	0.66	0.77	0.98	0.97	0.98	-0.26	1000000000000	APIP	ENSG00000149089
chr11:36424426:36424566:+@chr11:36429335:36429461:+@chr11:36440468:36443330:+	0.73	0.7	0.75	0.62	0.58	0.65	0.11	4.16853e+07	AC009656.11	ENSG00000135362
chr11:43290081:43290322:+@chr11:43296547:43296608:+@chr11:43296766:43296927:+	0.11	0.09	0.13	0.21	0.2	0.22	-0.1	1000000000000	API5L1	ENSG00000166181
chr11:44928804:44929184:-@chr11:44917293:44917422:-@chr11:44916334:44916493:-	0.3	0.26	0.34	0.17	0.12	0.22	0.13	21.79	TP53I11	ENSG00000175274
chr11:46070310:46070350:-@chr11:46068582:46068693:-@chr11:46062293:46062429:-	0.54	0.49	0.59	0.37	0.35	0.39	0.17	1000000000000	PHF21A	ENSG00000135365
chr11:46347620:46347676:+@chr11:46348067:46348135:+@chr11:46349439:46349510:+	0.79	0.74	0.85	0.89	0.86	0.91	-0.1	49.12	DGKZ	ENSG00000149091
chr11:47239368:47239576:+@chr11:47239674:47239853:+@chr11:47240046:47240145:+	0.71	0.66	0.77	0.93	0.91	0.94	-0.22	1000000000000	NR1H3	ENSG00000025434
chr11:604174:604399:-@chr11:603951:604037:-@chr11:603785:603865:-	0.9	0.87	0.91	0.79	0.77	0.8	0.11	1000000000000	IRF7	ENSG00000185507
chr11:604476:604534:-@chr11:604174:604399:-@chr11:603951:604037:-	0.68	0.65	0.71	0.8	0.78	0.82	-0.12	1000000000000	IRF7	ENSG00000185507
chr11:62357840:62357985:-@chr11:62357666:62357722:-@chr11:62356960:62357179:-	0.45	0.43	0.46	0.72	0.7	0.73	-0.27	1000000000000	WDR74	ENSG00000133316
chr11:64571695:64571786:-@chr11:64570493:64570574:-@chr11:64570237:64570410:-	0.25	0.21	0.29	0.35	0.32	0.38	-0.1	21.06	NAALADL1	ENSG00000168060
chr11:65117523:65117921:-@chr11:65117357:65117430:-@chr11:65116902:65117257:-	0.12	0.08	0.18	0.01	0	0.04	0.11	938.16	KCNK7	ENSG00000173338
chr11:65236969:65237105:+@chr11:65237395:65237550:+@chr11:65237640:65237714:+	0.35	0.32	0.38	0.46	0.45	0.48	-0.11	1000000000000	KAT5	ENSG00000172977
chr11:70863089:70863220:+@chr11:70864727:70866132:+@chr11:70867089:70867163:+	0.36	0.34	0.38	0.17	0.16	0.17	0.19	1000000000000	NADSYN1	ENSG00000172890
chr11:71387606:71387713:+@chr11:71387922:71388064:+@chr11:71388621:71388706:+	0.49	0.4	0.58	0.35	0.32	0.38	0.14	5.07	IL18BP	ENSG00000137496
chr11:72082018:72082163:-@chr11:72081446:72081478:-@chr11:72077148:72077230:-	0.36	0.34	0.39	0.51	0.5	0.53	-0.15	1000000000000	ARAP1	ENSG00000186635
chr11:73267472:73267512:+@chr11:73275724:73275792:+@chr11:73276047:73276150:+	0.14	0.08	0.22	0.04	0.03	0.05	0.1	10.68	PAAF1	ENSG00000175575
chr11:73267472:73267512:+@chr11:73275733:73275792:+@chr11:73276047:73276150:+	0.15	0.08	0.24	0.04	0.03	0.06	0.11	9.21	PAAF1	ENSG00000175575
chr11:74232861:74232976:-@chr11:74232547:74232652:-@chr11:74229603:74232146:-	0.27	0.22	0.33	0.14	0.12	0.16	0.13	2.85829e+06	XRRA1	ENSG00000166435
chr11:74333711:74333778:-@chr11:74329478:74329575:-@chr11:74325577:74325761:-	0.3	0.21	0.4	0.17	0.13	0.21	0.13	6.13	XRRA1	ENSG00000166435
chr11:85017265:85017380:+@chr11:85019837:85020008:+@chr11:85020379:85020500:+	0.76	0.73	0.79	0.62	0.61	0.64	0.14	1000000000000	TMEM126B	ENSG00000171204
chr11:85051081:85051149:-@chr11:85050329:85050441:-@chr11:85046256:85049289:-	0.95	0.92	0.98	0.83	0.8	0.85	0.12	1000000000000	CREBZF	ENSG00000137504
chr11:8889567:8889794:+@chr11:8890576:8890656:+@chr11:8892949:8893053:+	0.37	0.33	0.41	0.47	0.45	0.5	-0.1	13275.1	C11orf17	ENSG00000166452
chr11:95152419:95152499:-@chr11:95151890:95151947:-@chr11:95151634:95151769:-	0.52	0.48	0.55	0.42	0.41	0.44	0.1	822.31	FAM76B	ENSG00000077458
chr11:95194683:95194790:+@chr11:95195311:95195388:+@chr11:95200598:95200839:+	0.35	0.32	0.39	0.8	0.78	0.82	-0.45	1000000000000	CEP57	ENSG00000166037
chr11:95260424:95260496:-@chr11:95255186:95255308:-@chr11:95238413:95238488:-	0.2	0.11	0.3	0.06	0.04	0.08	0.14	14.58	MTMR2	ENSG00000087053
chr12:105873835:105873973:+@chr12:105874990:105875057:+@chr12:105885019:105885088:+	0.37	0.28	0.46	0.69	0.64	0.74	-0.32	1000000000000	C12orf23	ENSG00000151135
chr12:108483608:108483705:-@chr12:108483431:108483517:-@chr12:108483228:108483292:-	0.34	0.28	0.41	0.13	0.11	0.14	0.21	1000000000000	MMAB	ENSG00000139428
chr12:108498186:108498333:+@chr12:108501990:108502134:+@chr12:108508210:108508313:+	0.31	0.25	0.37	0.65	0.61	0.68	-0.34	1000000000000	MVK	ENSG00000110921
chr12:108869444:108869692:-@chr12:108867448:108867537:-@chr12:108861353:108861435:-	0.71	0.67	0.75	0.56	0.54	0.59	0.15	1000000000000	GIT2	ENSG00000139436
chr12:108873400:108873504:-@chr12:108867448:108867537:-@chr12:108861353:108861435:-	0.98	0.95	1	0.85	0.81	0.88	0.13	1000000000000	GIT2	ENSG00000139436
chr12:110378216:110378443:-@chr12:110375864:110376032:-@chr12:110374401:110375027:-	0.79	0.74	0.84	0.63	0.61	0.65	0.16	3.69571e+10	ATXN2	ENSG00000204842
chr12:110935535:110935796:+@chr12:110941943:110942081:+@chr12:110944337:110945407:+	0.86	0.85	0.87	0.73	0.73	0.74	0.13	1000000000000	ERP29	ENSG00000089248
chr12:119451126:119451347:-@chr12:119448643:119448732:-@chr12:119444400:119444549:-	0.36	0.31	0.41	0.14	0.13	0.16	0.22	1000000000000	COQ5	ENSG00000110871
chr12:119503301:119503443:-@chr12:119501960:119502109:-@chr12:119501700:119501783:-	0.87	0.84	0.9	0.77	0.76	0.78	0.1	3.03596e+11	POP5	ENSG00000167272
chr12:120171973:120172060:-@chr12:120170792:120170920:-@chr12:120167326:120167426:-	0.37	0.34	0.4	0.49	0.48	0.51	-0.12	1000000000000	CAMKK2	ENSG00000110931
chr12:121403226:121403286:-@chr12:121397875:121397979:-@chr12:121391253:121392197:-	0.16	0.13	0.19	0.27	0.25	0.29	-0.11	1000000000000	CLIP1	ENSG00000130779
chr12:121411459:121411681:-@chr12:121405615:121405812:-@chr12:121404953:121405056:-	0.93	0.9	0.96	0.79	0.77	0.81	0.14	1000000000000	CLIP1	ENSG00000130779
chr12:123428736:123428883:-@chr12:123424912:123424962:-@chr12:123422521:123423109:-	0.31	0.27	0.34	0.43	0.41	0.45	-0.12	4.65519e+11	NCOR2	ENSG00000196498
chr12:123836856:123837002:-@chr12:123833182:123833310:-@chr12:123828127:123829085:-	0.8	0.75	0.84	0.5	0.48	0.52	0.3	1000000000000	SCARB1	ENSG00000073060
chr12:131070547:131070716:+@chr12:131071577:131071819:+@chr12:131074275:131074439:+	0.74	0.66	0.81	0.88	0.84	0.92	-0.14	41.92	EP400	ENSG00000183495
chr12:132170125:132170220:+@chr12:132187646:132187712:+@chr12:132192169:132194331:+	0.77	0.68	0.84	0.53	0.49	0.56	0.24	4.1407e+11	ZNF140	ENSG00000196387
chr12:1789705:1789767:-@chr12:1781001:1781071:-@chr12:1780470:1780545:-	0.24	0.19	0.3	0.47	0.45	0.5	-0.23	1000000000000	CACNA2D4	ENSG00000151062
chr12:1791089:1791150:-@chr12:1789970:1790014:-@chr12:1789705:1789767:-	0.54	0.47	0.62	0.71	0.69	0.74	-0.17	51.1	CACNA2D4	ENSG00000151062
chr12:21551086:21551177:+@chr12:21552145:21552310:+@chr12:21552584:21552762:+	0.63	0.57	0.69	0.53	0.51	0.56	0.1	6.96	GOLT1B	ENSG00000111711
chr12:272186:272596:-@chr12:265553:265634:-@chr12:259484:265089:-	0.26	0.23	0.29	0.16	0.15	0.17	0.1	1000000000000	JARID1A	ENSG00000073614
chr12:27720628:27720799:+@chr12:27721264:27721296:+@chr12:27723689:27723839:+	0.41	0.34	0.49	0.22	0.19	0.26	0.19	50.16	PPFIBP1	ENSG00000110841
chr12:30779169:30779407:-@chr12:30777830:30777912:-@chr12:30775544:30775711:-	0.24	0.18	0.31	0.12	0.1	0.14	0.12	491.27	CAPRIN2	ENSG00000110888
chr12:31147137:31147221:+@chr12:31147523:31147596:+@chr12:31147778:31147932:+	0.67	0.6	0.73	0.81	0.79	0.84	-0.14	586.28	DDX11	ENSG00000013573
chr12:31370225:31370340:-@chr12:31349183:31349324:-@chr12:31342278:31342425:-	0.99	0.98	1	0.57	0.55	0.58	0.42	1000000000000	FAM60A	ENSG00000139146
chr12:31370225:31370340:-@chr12:31349187:31349324:-@chr12:31342278:31342425:-	0.99	0.98	1	0.63	0.62	0.64	0.36	1000000000000	FAM60A	ENSG00000139146
chr12:32781306:32781362:+@chr12:32782066:32782143:+@chr12:32784265:32784441:+	0.36	0.32	0.41	0.23	0.21	0.25	0.13	7.08164e+10	DNM1L	ENSG00000087470
chr12:42439020:42439086:+@chr12:42440995:42441042:+@chr12:42448173:42448342:+	0.44	0.37	0.51	0.32	0.3	0.35	0.12	7.96	IRAK4	ENSG00000198001
chr12:44573680:44573771:+@chr12:44584392:44584448:+@chr12:44584984:44588086:+	0.17	0.13	0.21	0.28	0.26	0.31	-0.11	2.63079e+06	ARID2	ENSG00000189079
chr12:44670403:44670668:-@chr12:44654240:44655784:-@chr12:44644157:44644238:-	0.33	0.32	0.35	0.22	0.21	0.23	0.11	1000000000000	SFRS2IP	ENSG00000139218
chr12:4584341:4584513:+@chr12:4586754:4586814:+@chr12:4589582:4589711:+	0.55	0.48	0.63	0.38	0.36	0.4	0.17	4532.69	DYRK4	ENSG00000010219
chr12:46473419:46473638:-@chr12:46472588:46472719:-@chr12:46471921:46472054:-	0.27	0.25	0.3	0.15	0.14	0.16	0.12	1000000000000	HDAC7	ENSG00000061273
chr12:46476257:46476348:-@chr12:46475956:46476066:-@chr12:46475637:46475817:-	0.55	0.52	0.59	0.42	0.4	0.44	0.13	1000000000000	HDAC7	ENSG00000061273
chr12:46499817:46500030:-@chr12:46482274:46482324:-@chr12:46478835:46479022:-	0.68	0.62	0.73	0.85	0.82	0.88	-0.17	1000000000000	HDAC7	ENSG00000061273
chr12:46776393:46776477:-@chr12:46769213:46769343:-@chr12:46768851:46769010:-	0.23	0.2	0.27	0.13	0.11	0.14	0.1	1000000000000	SENP1	ENSG00000079387
chr12:48248098:48248178:-@chr12:48246127:48246891:-@chr12:48245579:48245717:-	0.87	0.83	0.91	0.97	0.96	0.98	-0.1	2.53068e+06	MCRS1	ENSG00000187778
chr12:49729084:49729235:+@chr12:49733828:49733910:+@chr12:49735885:49736071:+	0.9	0.85	0.94	0.77	0.75	0.79	0.13	3.57049e+07	LETMD1	ENSG00000050426
chr12:52393151:52393257:-@chr12:52392826:52392897:-@chr12:52391169:52392172:-	0.05	0.04	0.07	0.15	0.14	0.16	-0.1	1000000000000	CALCOCO1	ENSG00000012822
chr12:52980852:52981088:-@chr12:52980198:52980327:-@chr12:52975186:52975355:-	0.35	0.32	0.38	0.15	0.14	0.15	0.2	1000000000000	NFE2	ENSG00000123405
chr12:56399043:56399232:+@chr12:56400149:56400313:+@chr12:56400456:56400568:+	0.41	0.4	0.43	0.59	0.59	0.6	-0.18	1000000000000	OS9	ENSG00000135506
chr12:61005920:61005981:+@chr12:61029269:61029355:+@chr12:61035379:61035523:+	0.79	0.76	0.81	0.68	0.67	0.69	0.11	1000000000000	USP15	ENSG00000135655
chr12:61245284:61245427:+@chr12:61246061:61246078:+@chr12:61246369:61246497:+	0.05	0.02	0.07	0.21	0.19	0.23	-0.16	1000000000000	MON2	ENSG00000061987
chr12:63096745:63096801:+@chr12:63098093:63098162:+@chr12:63098923:63099141:+	0.48	0.43	0.54	0.75	0.71	0.78	-0.27	1000000000000	XPOT	ENSG00000184575
chr12:63958755:63958912:+@chr12:63986910:63987073:+@chr12:63988576:63988702:+	0.22	0.17	0.27	0.37	0.34	0.4	-0.15	1.95262e+10	MSRB3	ENSG00000174099
chr12:64825888:64826005:-@chr12:64818771:64818781:-@chr12:64816984:64818213:-	0.96	0.91	0.98	0.81	0.78	0.84	0.15	839252	AC078927.20-2	ENSG00000214287
chr12:64989753:64990655:+@chr12:64994033:64994210:+@chr12:64995289:64995430:+	0.35	0.31	0.4	0.45	0.42	0.47	-0.1	5.33	HELB	ENSG00000127311
chr12:66328779:66329229:+@chr12:66329844:66329992:+@chr12:66337153:66342711:+	0.61	0.55	0.67	0.4	0.38	0.42	0.21	1000000000000	DYRK2	ENSG00000127334
chr12:6704041:6704245:+@chr12:6707353:6707428:+@chr12:6707650:6707738:+	0.66	0.62	0.7	0.78	0.77	0.8	-0.12	1000000000000	COPS7A	ENSG00000111652
chr12:68150396:68150577:+@chr12:68160346:68160406:+@chr12:68210912:68211007:+	0.23	0.17	0.29	0.38	0.35	0.41	-0.15	96.54	AC018921.22	ENSG00000205128
chr12:68481656:68481768:+@chr12:68492825:68492924:+@chr12:68493011:68493080:+	0.81	0.72	0.88	0.94	0.92	0.96	-0.13	26.18	RAB3IP	ENSG00000127328
chr12:8134058:8134162:+@chr12:8135632:8135713:+@chr12:8136539:8136647:+	0.86	0.84	0.89	0.71	0.69	0.73	0.15	1000000000000	AC006511.5-3	ENSG00000089818
chr12:8167495:8167823:+@chr12:8169424:8169540:+@chr12:8179448:8179599:+	0.96	0.91	0.99	0.85	0.83	0.87	0.11	19.11	ZNF705A	ENSG00000196946
chr12:8167495:8167823:+@chr12:8173127:8173225:+@chr12:8179448:8179599:+	0.95	0.91	0.98	0.76	0.73	0.8	0.19	1000000000000	ZNF705A	ENSG00000196946
chr12:88443028:88443112:-@chr12:88415079:88415250:-@chr12:88409844:88410023:-	0.3	0.25	0.36	0.4	0.38	0.42	-0.1	10.37	WDR51B	ENSG00000139323
chr12:8961493:8961654:+@chr12:8963619:8963729:+@chr12:8964848:8964928:+	0.94	0.84	0.99	0.72	0.67	0.77	0.22	31725.3	PHC1	ENSG00000111752
chr12:906572:906690:-@chr12:906223:906373:-@chr12:904877:904952:-	0.68	0.59	0.78	0.29	0.26	0.33	0.39	1000000000000	RAD52	ENSG00000002016
chr12:94169847:94169978:+@chr12:94174457:94174529:+@chr12:94175057:94175146:+	0.94	0.9	0.96	0.82	0.8	0.84	0.12	1000000000000	VEZT	ENSG00000028203
chr12:9713576:9713658:+@chr12:9724786:9724896:+@chr12:9731765:9731949:+	0.96	0.93	0.99	0.78	0.75	0.82	0.18	1000000000000	AC007068.17	ENSG00000214774
chr12:9731765:9731949:+@chr12:9736691:9736794:+@chr12:9738623:9743306:+	0.77	0.69	0.84	0.66	0.61	0.69	0.11	18.29	AC007068.17	ENSG00000214774
chr12:9731765:9732024:+@chr12:9736691:9736794:+@chr12:9738623:9743306:+	0.41	0.36	0.48	0.29	0.27	0.33	0.12	131.33	AC007068.17	ENSG00000214774
chr12:9736691:9736794:+@chr12:9736897:9736978:+@chr12:9738623:9743306:+	0.51	0.46	0.56	0.25	0.23	0.28	0.26	1000000000000	AC007068.17	ENSG00000214774
chr12:97617317:97617478:+@chr12:97621280:97621408:+@chr12:97624394:97624519:+	0.23	0.2	0.25	0.5	0.48	0.52	-0.27	1000000000000	APAF1	ENSG00000120868
chr13:113338850:113339016:+@chr13:113340134:113340200:+@chr13:113342436:113343506:+	0.6	0.58	0.62	0.75	0.73	0.76	-0.15	1000000000000	TFDP1	ENSG00000198176
chr13:113338850:113339016:+@chr13:113340134:113340212:+@chr13:113342436:113343506:+	0.71	0.7	0.73	0.85	0.84	0.85	-0.14	1000000000000	TFDP1	ENSG00000198176
chr13:20039208:20039395:+@chr13:20039809:20040136:+@chr13:20046519:20046614:+	0.32	0.27	0.37	0.43	0.39	0.46	-0.11	12.15	IFT88	ENSG00000032742
chr13:20853573:20853685:-@chr13:20850800:20850877:-@chr13:20848508:20848794:-	0.26	0.24	0.29	0.16	0.15	0.17	0.1	1000000000000	ZDHHC20	ENSG00000180776
chr13:20855059:20855148:-@chr13:20854040:20854084:-@chr13:20853573:20853685:-	0.15	0.12	0.19	0.27	0.25	0.29	-0.12	453.16	ZDHHC20	ENSG00000180776
chr13:20855059:20855148:-@chr13:20854040:20854084:-@chr13:20853573:20853688:-	0.11	0.09	0.13	0.23	0.22	0.25	-0.12	1000000000000	ZDHHC20	ENSG00000180776
chr13:30089830:30090193:+@chr13:30093210:30093376:+@chr13:30093901:30094029:+	0.57	0.53	0.62	0.45	0.43	0.48	0.12	12997.6	USPL1	ENSG00000132952
chr13:31750602:31750685:+@chr13:31760004:31760021:+@chr13:31761770:31761880:+	0.16	0.1	0.24	0.01	0	0.01	0.15	4.64795e+06	FRY	ENSG00000073910
chr13:44855226:44855370:+@chr13:44855895:44855973:+@chr13:44861870:44861955:+	0.71	0.61	0.81	0.44	0.39	0.48	0.27	9.50133e+09	AL627107.32	ENSG00000215477
chr13:44861870:44861955:+@chr13:44862849:44863037:+@chr13:44863167:44863857:+	0.95	0.92	0.96	0.84	0.83	0.86	0.11	1000000000000	AL627107.32	ENSG00000215477
chr13:47982766:47982908:-@chr13:47976363:47976527:-@chr13:47974861:47975051:-	0.12	0.08	0.17	0.23	0.21	0.26	-0.11	81.34	RCBTB2	ENSG00000136161
chr13:48731483:48731660:+@chr13:48738016:48738140:+@chr13:48739627:48740196:+	0.61	0.58	0.64	0.5	0.48	0.52	0.11	1000000000000	CDADC1	ENSG00000102543
chr13:49141914:49141983:-@chr13:49135194:49135314:-@chr13:49132863:49133345:-	0.59	0.56	0.63	0.45	0.44	0.47	0.14	1000000000000	AL135901.23-2	ENSG00000203548
chr13:49141914:49141983:-@chr13:49135194:49135332:-@chr13:49132863:49133345:-	0.68	0.64	0.71	0.5	0.49	0.52	0.18	1000000000000	AL135901.23-2	ENSG00000203548
chr13:49163391:49163612:-@chr13:49141914:49141983:-@chr13:49132863:49133345:-	0.39	0.35	0.44	0.22	0.2	0.23	0.17	1000000000000	AL135901.23-2	ENSG00000203548
chr13:49554415:49554694:+@chr13:49555279:49555331:+@chr13:49576841:49577434:+	0.38	0.32	0.44	0.57	0.55	0.59	-0.19	1000000000000	AL137060.13	ENSG00000214359
chr13:51616052:51616123:-@chr13:51613157:51613206:-@chr13:51608937:51609039:-	0.98	0.92	1	0.8	0.76	0.84	0.18	2.22688e+09	NEK3	ENSG00000136098
chr13:51616052:51616123:-@chr13:51613157:51613207:-@chr13:51608937:51609039:-	0.97	0.92	1	0.77	0.72	0.82	0.2	1000000000000	NEK3	ENSG00000136098
chr13:76593509:76593631:-@chr13:76590476:76590655:-@chr13:76569506:76571149:-	0.33	0.3	0.35	0.2	0.19	0.21	0.13	1000000000000	MYCBP2	ENSG00000005810
chr13:96797059:96797322:+@chr13:96807051:96807104:+@chr13:96807737:96807890:+	0.07	0.02	0.12	0.17	0.14	0.2	-0.1	11.23	MBNL2	ENSG00000139793
chr13:99309116:99309304:+@chr13:99313246:99313347:+@chr13:99315073:99315166:+	0.72	0.65	0.8	0.85	0.82	0.87	-0.13	6.51	CLYBL	ENSG00000125246
chr14:100365124:100365839:+@chr14:100371826:100371969:+@chr14:100372257:100372390:+	0.75	0.66	0.84	0.97	0.94	0.99	-0.22	538.08	AL117190.6-3	ENSG00000214515
chr14:100368602:100368731:+@chr14:100371826:100371969:+@chr14:100372257:100372390:+	0.87	0.79	0.94	0.98	0.95	1	-0.11	9.44	AL117190.6-3	ENSG00000214515
chr14:102870246:102870350:+@chr14:102870479:102870687:+@chr14:102871743:102872022:+	0.67	0.65	0.69	0.54	0.53	0.55	0.13	1000000000000	EIF5	ENSG00000100664
chr14:103034592:103034618:+@chr14:103036246:103036290:+@chr14:103038972:103039919:+	0.17	0.13	0.23	0.31	0.28	0.34	-0.14	481.25	MARK3	ENSG00000075413
chr14:103215474:103215608:+@chr14:103223171:103223299:+@chr14:103236745:103236817:+	0.37	0.33	0.42	0.27	0.25	0.28	0.1	37244.8	KLC1	ENSG00000126214
chr14:103215474:103215608:+@chr14:103223171:103223301:+@chr14:103236745:103236817:+	0.52	0.47	0.57	0.36	0.34	0.38	0.16	1000000000000	KLC1	ENSG00000126214
chr14:103215474:103215635:+@chr14:103223171:103223301:+@chr14:103236745:103236817:+	0.53	0.48	0.57	0.42	0.4	0.44	0.11	27394.8	KLC1	ENSG00000126214
chr14:104251585:104252238:+@chr14:104252666:104252722:+@chr14:104256177:104256992:+	0.29	0.26	0.32	0.42	0.4	0.43	-0.13	1000000000000	INF2	ENSG00000203485
chr14:104982800:104982893:+@chr14:104986741:104986791:+@chr14:104987440:104987566:+	0.55	0.52	0.59	0.72	0.7	0.73	-0.17	1000000000000	MTA1	ENSG00000182979
chr14:105307675:105307719:-@chr14:105307487:105307531:-@chr14:105307039:105307368:-	0.02	0.01	0.03	0.14	0.13	0.16	-0.12	1000000000000	IGHG3	ENSG00000211897
chr14:105307863:105307907:-@chr14:105307487:105307531:-@chr14:105307039:105307368:-	0.04	0.02	0.06	0.2	0.17	0.22	-0.16	1000000000000	IGHG3	ENSG00000211897
chr14:20561240:20561320:-@chr14:20560863:20560904:-@chr14:20560391:20560496:-	0.43	0.35	0.52	0.22	0.2	0.24	0.21	6.91679e+09	NDRG2	ENSG00000165795
chr14:20807297:20807478:-@chr14:20801666:20801828:-@chr14:20801310:20801335:-	0.45	0.43	0.46	0.29	0.29	0.3	0.16	1000000000000	HNRNPC	ENSG00000092199
chr14:22358687:22358854:-@chr14:22354369:22354500:-@chr14:22351949:22352489:-	0.84	0.75	0.91	0.96	0.93	0.98	-0.12	23.58	AL135998.6-2	ENSG00000215306
chr14:22448532:22448644:-@chr14:22447382:22447429:-@chr14:22445244:22445417:-	0.65	0.61	0.69	0.49	0.47	0.51	0.16	1000000000000	RBM23	ENSG00000100461
chr14:22491377:22491508:-@chr14:22489363:22489459:-@chr14:22486650:22486780:-	0.52	0.45	0.59	0.39	0.35	0.42	0.13	17.63	C14orf94	ENSG00000092036
chr14:22629571:22629682:-@chr14:22629031:22629150:-@chr14:22620797:22620885:-	0.49	0.46	0.52	0.6	0.59	0.61	-0.11	1000000000000	ACIN1	ENSG00000100813
chr14:23106160:23106368:-@chr14:23105611:23105735:-@chr14:23105327:23105468:-	0.78	0.75	0.8	0.9	0.89	0.9	-0.12	1000000000000	AP1G2	ENSG00000213983
chr14:23981224:23981306:-@chr14:23980720:23980841:-@chr14:23979829:23979972:-	0.77	0.74	0.81	0.88	0.87	0.89	-0.11	1000000000000	SDR39U1	ENSG00000100445
chr14:34331732:34331878:-@chr14:34325083:34325178:-@chr14:34324734:34324958:-	0.75	0.72	0.78	0.87	0.85	0.88	-0.12	1000000000000	BAZ1A	ENSG00000198604
chr14:38858164:38858246:+@chr14:38859883:38860011:+@chr14:38865819:38865977:+	0.79	0.75	0.82	0.69	0.67	0.7	0.1	218097	CTAGE5	ENSG00000150527
chr14:49138838:49138936:+@chr14:49143868:49144589:+@chr14:49150724:49151140:+	0.89	0.86	0.91	0.73	0.71	0.75	0.16	1000000000000	PPIL5	ENSG00000165501
chr14:50296325:50296827:-@chr14:50292960:50295098:-@chr14:50291210:50291335:-	0.52	0.5	0.53	0.42	0.41	0.43	0.1	1000000000000	NIN	ENSG00000100503
chr14:57834426:57834603:-@chr14:57830237:57832282:-@chr14:57828106:57828178:-	0.42	0.4	0.44	0.27	0.26	0.27	0.15	1000000000000	AL132989.5-2	ENSG00000209824
chr14:59662108:59662294:+@chr14:59670127:59670256:+@chr14:59670441:59671285:+	0.28	0.25	0.32	0.12	0.11	0.13	0.16	1000000000000	C14orf135	ENSG00000126773
chr14:63750665:63750941:+@chr14:63751757:63751825:+@chr14:63752719:63752858:+	0.18	0.13	0.24	0.03	0.02	0.05	0.15	1000000000000	SYNE2	ENSG00000054654
chr14:64638775:64638980:-@chr14:64638017:64638043:-@chr14:64630179:64630286:-	0.74	0.71	0.76	0.6	0.59	0.61	0.14	1000000000000	MAX	ENSG00000125952
chr14:73413454:73413624:+@chr14:73415552:73415761:+@chr14:73416511:73416632:+	0.78	0.71	0.84	0.88	0.85	0.91	-0.1	8.67	PTGR2	ENSG00000140043
chr14:73457436:73457561:+@chr14:73458522:73458662:+@chr14:73459851:73459978:+	0.27	0.25	0.29	0.38	0.37	0.4	-0.11	1000000000000	ZNF410	ENSG00000119725
chr14:74599926:74600017:-@chr14:74598140:74598218:-@chr14:74589681:74590115:-	0.46	0.42	0.5	0.31	0.29	0.32	0.15	1000000000000	ACYP1	ENSG00000119640
chr14:76993591:76993657:-@chr14:76993191:76993461:-@chr14:76990106:76990198:-	0.27	0.22	0.33	0.15	0.14	0.17	0.12	3061.7	C14orf133	ENSG00000151445
chr14:88817047:88817111:-@chr14:88726481:88726546:-@chr14:88716798:88716903:-	0.46	0.41	0.5	0.58	0.55	0.6	-0.12	115762	FOXN3	ENSG00000053254
chr14:89155125:89155247:-@chr14:89022666:89022768:-@chr14:88948031:88948587:-	0.32	0.3	0.35	0.2	0.19	0.21	0.12	1000000000000	FOXN3	ENSG00000053254
chr14:89840032:89840479:-@chr14:89838817:89839222:-@chr14:89837336:89837469:-	0.9	0.83	0.95	0.63	0.61	0.66	0.27	1000000000000	C14orf102	ENSG00000119720
chr14:90650110:90650380:+@chr14:90681318:90681410:+@chr14:90693736:90693787:+	0.26	0.21	0.31	0.39	0.37	0.42	-0.13	360251	SNORA11	ENSG00000221102
chr14:90650110:90650625:+@chr14:90681318:90681410:+@chr14:90693736:90693787:+	0.24	0.18	0.3	0.39	0.36	0.41	-0.15	1.03129e+06	SNORA11	ENSG00000221102
chr14:93926510:93926782:-@chr14:93924891:93925100:-@chr14:93924650:93924753:-	0.28	0.24	0.32	0.18	0.17	0.19	0.1	726797	SERPINA1	ENSG00000197249
chr14:94677773:94677838:-@chr14:94677244:94677277:-@chr14:94676749:94676849:-	0.27	0.2	0.34	0.11	0.09	0.14	0.16	32776	DICER1	ENSG00000100697
chr14:99911373:99911680:-@chr14:99910226:99910355:-@chr14:99905177:99905348:-	0.34	0.29	0.39	0.05	0.05	0.06	0.29	1000000000000	WARS	ENSG00000140105
chr15:100323796:100323949:+@chr15:100330309:100330420:+@chr15:100330627:100330773:+	0.83	0.8	0.85	0.72	0.71	0.74	0.11	1000000000000	FAM39B	ENSG00000185596
chr15:100323796:100323949:+@chr15:100330319:100330420:+@chr15:100330627:100330773:+	0.78	0.76	0.81	0.65	0.64	0.66	0.13	1000000000000	FAM39B	ENSG00000185596
chr15:100323796:100323949:+@chr15:100330322:100330420:+@chr15:100330627:100330773:+	0.82	0.8	0.84	0.71	0.7	0.73	0.11	1000000000000	FAM39B	ENSG00000185596
chr15:20749951:20750116:-@chr15:20747603:20747732:-@chr15:20746154:20746340:-	0.65	0.62	0.68	0.89	0.88	0.9	-0.24	1000000000000	WHAMML1	ENSG00000187667
chr15:20751678:20751847:-@chr15:20749951:20750116:-@chr15:20747603:20747732:-	0.83	0.77	0.89	0.2	0.18	0.21	0.63	1000000000000	WHAMML1	ENSG00000187667
chr15:20752930:20753080:-@chr15:20752072:20752230:-@chr15:20751678:20751847:-	0.31	0.28	0.35	0.15	0.13	0.17	0.16	1000000000000	WHAMML1	ENSG00000187667
chr15:22883707:22883839:+@chr15:22885854:22886106:+@chr15:22887830:22887959:+	0.98	0.95	1	0.88	0.84	0.92	0.1	44.21	SNORD116	ENSG00000207259
chr15:23205328:23205447:-@chr15:23204812:23204924:-@chr15:23203307:23203502:-	0.04	0.01	0.09	0.16	0.13	0.19	-0.12	25.43	UBE3A	ENSG00000114062
chr15:28189797:28189921:+@chr15:28193403:28193466:+@chr15:28196387:28196433:+	0.1	0.07	0.14	0.2	0.17	0.22	-0.1	103.28	U8	ENSG00000207432
chr15:28466358:28466482:-@chr15:28462814:28462877:-@chr15:28459848:28459894:-	0.77	0.7	0.82	0.93	0.91	0.95	-0.16	1000000000000	CHRFAM7A	ENSG00000166664
chr15:28658783:28658907:+@chr15:28662389:28662452:+@chr15:28665373:28665419:+	0.76	0.72	0.81	0.93	0.92	0.95	-0.17	1000000000000	U8	ENSG00000207430
chr15:28658783:28658907:+@chr15:28665373:28665419:+@chr15:28676155:28676233:+	0.73	0.64	0.83	0.54	0.49	0.6	0.19	67.84	U8	ENSG00000207430
chr15:30507684:30507808:-@chr15:30504138:30504201:-@chr15:30501175:30501221:-	0.78	0.72	0.83	0.93	0.9	0.94	-0.15	7.63359e+09	U8	ENSG00000206987
chr15:30606306:30606471:-@chr15:30603964:30604093:-@chr15:30602186:30602706:-	0.57	0.55	0.6	0.69	0.68	0.7	-0.12	1000000000000	AC135983.4-1	ENSG00000215302
chr15:32338306:32338437:-@chr15:32337135:32337281:-@chr15:32335722:32335776:-	0.53	0.49	0.57	0.63	0.6	0.66	-0.1	38.35	SLC12A6	ENSG00000140199
chr15:38125454:38125562:+@chr15:38143954:38144094:+@chr15:38144714:38147002:+	0.59	0.51	0.66	0.71	0.68	0.74	-0.12	7.73	AC021755.9-4	ENSG00000206058
chr15:38185288:38185584:-@chr15:38183673:38183833:-@chr15:38167383:38171381:-	0.81	0.79	0.84	0.65	0.63	0.68	0.16	1000000000000	BMF	ENSG00000104081
chr15:38185288:38185584:-@chr15:38183736:38183833:-@chr15:38167383:38171381:-	0.59	0.55	0.63	0.42	0.4	0.44	0.17	1000000000000	BMF	ENSG00000104081
chr15:38788515:38788606:+@chr15:38798295:38798389:+@chr15:38808201:38808314:+	0.57	0.52	0.62	0.82	0.8	0.85	-0.25	1000000000000	RAD51	ENSG00000051180
chr15:40628345:40628455:+@chr15:40637688:40637780:+@chr15:40638829:40638898:+	0.91	0.88	0.93	0.79	0.77	0.81	0.12	1000000000000	CEP27	ENSG00000137814
chr15:41501345:41501616:-@chr15:41500515:41500664:-@chr15:41499795:41500225:-	0.53	0.49	0.58	0.67	0.65	0.69	-0.14	7.32979e+09	TP53BP1	ENSG00000067369
chr15:42460296:42460466:+@chr15:42482377:42482544:+@chr15:42492826:42495247:+	0.72	0.7	0.75	0.62	0.6	0.63	0.1	1000000000000	CASC4	ENSG00000166734
chr15:46230962:46231060:-@chr15:46230589:46230660:-@chr15:46228652:46228860:-	0.61	0.53	0.69	0.41	0.37	0.44	0.2	22109.3	MYEF2	ENSG00000104177
chr15:49542868:49542985:-@chr15:49539087:49539149:-@chr15:49538198:49538284:-	0.71	0.66	0.76	0.88	0.86	0.9	-0.17	1000000000000	DMXL2	ENSG00000104093
chr15:55718930:55719035:+@chr15:55740940:55741023:+@chr15:55791474:55791678:+	0.44	0.36	0.52	0.02	0.01	0.02	0.42	1000000000000	GRINL1A	ENSG00000137878
chr15:61365810:61365880:+@chr15:61366676:61366798:+@chr15:61381597:61381724:+	0.86	0.79	0.92	0.65	0.63	0.68	0.21	1000000000000	APH1B	ENSG00000138613
chr15:63690489:63690680:-@chr15:63686693:63686816:-@chr15:63684520:63684627:-	0.27	0.21	0.34	0.4	0.37	0.43	-0.13	40.88	C15orf44	ENSG00000138614
chr15:63690489:63690680:-@chr15:63686693:63686833:-@chr15:63684520:63684627:-	0.42	0.35	0.48	0.57	0.55	0.6	-0.15	4826.85	C15orf44	ENSG00000138614
chr15:63704679:63705362:+@chr15:63717520:63717573:+@chr15:63718987:63719095:+	0.15	0.09	0.23	0.43	0.38	0.48	-0.28	1000000000000	SLC24A1	ENSG00000074621
chr15:64577034:64577200:-@chr15:64574722:64574811:-@chr15:64573807:64573944:-	0.91	0.87	0.93	0.8	0.78	0.81	0.11	1000000000000	SNAPC5	ENSG00000174446
chr15:66284513:66284543:-@chr15:66278933:66279073:-@chr15:66276832:66277020:-	0.25	0.2	0.31	0.57	0.54	0.61	-0.32	1000000000000	CALML4	ENSG00000129007
chr15:66284637:66285502:-@chr15:66278933:66279073:-@chr15:66276832:66277020:-	0.3	0.25	0.36	0.9	0.87	0.93	-0.6	1000000000000	CALML4	ENSG00000129007
chr15:66284637:66285502:-@chr15:66284513:66284543:-@chr15:66278933:66279073:-	0.95	0.9	0.99	0.85	0.82	0.87	0.1	10.42	CALML4	ENSG00000129007
chr15:67502552:67502722:+@chr15:67504675:67504716:+@chr15:67505463:67505575:+	0.2	0.16	0.26	0.37	0.33	0.41	-0.17	2.71258e+06	KIF23	ENSG00000137807
chr15:67519701:67519880:+@chr15:67520161:67520472:+@chr15:67524183:67524434:+	0.68	0.63	0.73	0.47	0.45	0.5	0.21	1000000000000	KIF23	ENSG00000137807
chr15:69928240:69928363:-@chr15:69926810:69926863:-@chr15:69909504:69909706:-	0.11	0.07	0.16	0.21	0.19	0.24	-0.1	143.04	MYO9A	ENSG00000066933
chr15:69973074:69973173:-@chr15:69972360:69972572:-@chr15:69967399:69967511:-	0.55	0.46	0.63	0.32	0.29	0.35	0.23	2.61051e+09	MYO9A	ENSG00000066933
chr15:69973074:69973173:-@chr15:69972360:69972575:-@chr15:69967399:69967511:-	0.44	0.35	0.54	0.24	0.21	0.26	0.2	185638	MYO9A	ENSG00000066933
chr15:72104251:72104321:+@chr15:72111966:72112109:+@chr15:72112550:72112808:+	0.43	0.4	0.46	0.53	0.52	0.55	-0.1	2.18659e+11	PML	ENSG00000140464
chr15:72975546:72975719:+@chr15:72976405:72976613:+@chr15:72976906:72977618:+	0.41	0.38	0.45	0.58	0.57	0.6	-0.17	1000000000000	MPI	ENSG00000178802
chr15:87649840:87649933:+@chr15:87650242:87650429:+@chr15:87651711:87651764:+	0.74	0.69	0.8	0.93	0.91	0.95	-0.19	1000000000000	FANCI	ENSG00000140525
chr15:87649840:87649933:+@chr15:87650245:87650429:+@chr15:87651711:87651764:+	0.61	0.54	0.68	0.88	0.85	0.9	-0.27	1000000000000	FANCI	ENSG00000140525
chr15:89234635:89234718:+@chr15:89235216:89235425:+@chr15:89235788:89235910:+	0.6	0.58	0.62	0.86	0.86	0.87	-0.26	1000000000000	FES	ENSG00000182511
chr15:89313681:89313857:-@chr15:89313313:89313354:-@chr15:89310272:89311436:-	0.22	0.19	0.26	0.44	0.42	0.47	-0.22	1000000000000	PRC1	ENSG00000198901
chr15:97290987:97291057:+@chr15:97295576:97295805:+@chr15:97296068:97296178:+	0.9	0.82	0.95	0.7	0.63	0.76	0.2	55.49	IGF1R	ENSG00000140443
chr16:10902872:10902916:+@chr16:10903396:10903542:+@chr16:10904016:10904159:+	0.67	0.64	0.69	0.77	0.75	0.78	-0.1	1000000000000	CIITA	ENSG00000179583
chr16:109125:109254:-@chr16:107300:107374:-@chr16:102621:102774:-	0.63	0.59	0.68	0.77	0.75	0.79	-0.14	1000000000000	C16orf35	ENSG00000103148
chr16:19442680:19442911:+@chr16:19444542:19444684:+@chr16:19446690:19446845:+	0.66	0.6	0.71	0.52	0.5	0.55	0.14	100435	AC012621.2	ENSG00000103540
chr16:20740585:20740725:+@chr16:20743262:20743395:+@chr16:20744656:20744771:+	0.68	0.61	0.75	0.51	0.47	0.55	0.17	153.3	AC004381.1-3	ENSG00000209026
chr16:20759154:20759291:+@chr16:20762757:20762849:+@chr16:20763452:20763668:+	0.64	0.6	0.69	0.78	0.76	0.8	-0.14	1000000000000	AC004381.6	ENSG00000005189
chr16:20819058:20819358:+@chr16:20821309:20821540:+@chr16:20834379:20834537:+	0.25	0.22	0.28	0.35	0.34	0.37	-0.1	1000000000000	LYRM1	ENSG00000102897
chr16:20821309:20821540:+@chr16:20830006:20830087:+@chr16:20834379:20834537:+	0.3	0.24	0.37	0.18	0.16	0.2	0.12	27.57	LYRM1	ENSG00000102897
chr16:2258057:2258115:-@chr16:2254575:2254762:-@chr16:2254178:2254333:-	0.67	0.65	0.69	0.54	0.53	0.55	0.13	1000000000000	AC009065.8-3	ENSG00000207715
chr16:28130188:28130691:-@chr16:28127809:28127944:-@chr16:28099763:28099853:-	0.16	0.14	0.18	0.06	0.06	0.07	0.1	1000000000000	XPO6	ENSG00000169180
chr16:29919751:29919862:+@chr16:29920236:29920352:+@chr16:29924043:29924613:+	0.68	0.64	0.73	0.87	0.85	0.88	-0.19	1000000000000	INO80E	ENSG00000169592
chr16:3273488:3274206:+@chr16:3275060:3275240:+@chr16:3275682:3275755:+	0.25	0.19	0.3	0.37	0.34	0.4	-0.12	2764.29	ZNF263	ENSG00000006194
chr16:55526648:55526725:+@chr16:55526817:55526888:+@chr16:55528100:55528230:+	0.77	0.74	0.79	0.65	0.64	0.67	0.12	1000000000000	HERPUD1	ENSG00000051108
chr16:56271918:56272030:+@chr16:56275345:56275625:+@chr16:56275803:56275896:+	0.92	0.91	0.93	0.72	0.71	0.74	0.2	1000000000000	GPR97	ENSG00000182885
chr16:570859:570973:+@chr16:572249:572310:+@chr16:572884:574110:+	0.71	0.62	0.78	0.87	0.85	0.89	-0.16	124.89	PIGQ	ENSG00000007541
chr16:625282:625341:-@chr16:624890:624957:-@chr16:624720:624798:-	0.63	0.57	0.68	0.79	0.77	0.8	-0.16	4.03939e+10	C16orf13	ENSG00000130731
chr16:626095:626348:-@chr16:625613:625775:-@chr16:624720:624798:-	0.67	0.62	0.71	0.88	0.87	0.89	-0.21	1000000000000	C16orf13	ENSG00000130731
chr16:626095:626348:-@chr16:625613:625775:-@chr16:625282:625341:-	0.61	0.57	0.65	0.93	0.92	0.94	-0.32	1000000000000	C16orf13	ENSG00000130731
chr16:65422251:65422380:-@chr16:65419384:65419481:-@chr16:65418081:65418184:-	0.18	0.15	0.21	0.08	0.07	0.09	0.1	1000000000000	APPBP1	ENSG00000159593
chr16:65774666:65775444:-@chr16:65772962:65773101:-@chr16:65771445:65772070:-	0.5	0.43	0.57	0.67	0.64	0.69	-0.17	20838.3	EXOC3L	ENSG00000179044
chr16:65774666:65775444:-@chr16:65773010:65773101:-@chr16:65771445:65772070:-	0.45	0.38	0.53	0.6	0.57	0.63	-0.15	27.05	EXOC3L	ENSG00000179044
chr16:66247828:66248049:+@chr16:66248205:66248285:+@chr16:66248643:66248720:+	0.73	0.67	0.78	0.89	0.86	0.91	-0.16	5.20841e+09	RLTPR	ENSG00000159753
chr16:66591852:66591990:-@chr16:66590671:66591152:-@chr16:66584354:66584661:-	0.39	0.32	0.47	0.25	0.23	0.27	0.14	1866.89	DPEP2	ENSG00000167261
chr16:66866095:66866653:+@chr16:66879150:66879275:+@chr16:66882613:66882736:+	0.78	0.7	0.86	0.65	0.61	0.67	0.13	9.07	SLC7A6	ENSG00000103064
chr16:68569481:68569516:-@chr16:68568215:68569407:-@chr16:68567703:68568136:-	0.74	0.69	0.79	0.9	0.88	0.91	-0.16	1000000000000	PDXDC2	ENSG00000196696
chr16:70455542:70455646:-@chr16:70453180:70453346:-@chr16:70451084:70452076:-	0.14	0.09	0.21	0.27	0.23	0.32	-0.13	12.91	ZNF821	ENSG00000102984
chr16:74238977:74239078:-@chr16:74235682:74235861:-@chr16:74232963:74233122:-	0.35	0.33	0.37	0.22	0.21	0.23	0.13	1000000000000	KARS	ENSG00000065427
chr16:76316829:76316982:+@chr16:76327226:76327384:+@chr16:76332980:76333658:+	0.31	0.23	0.4	0.47	0.44	0.5	-0.16	35.5	NUDT7	ENSG00000140876
chr16:778257:778384:-@chr16:777557:777745:-@chr16:777355:777478:-	0.63	0.56	0.69	0.81	0.79	0.84	-0.18	1.2513e+11	RPUSD1	ENSG00000007376
chr16:82774351:82774440:-@chr16:82774179:82774256:-@chr16:82773309:82773547:-	0.76	0.71	0.82	0.89	0.87	0.91	-0.13	288396	TAF1C	ENSG00000103168
chr16:84204425:84204505:+@chr16:84225021:84225239:+@chr16:84239659:84239858:+	0.72	0.64	0.8	0.39	0.37	0.41	0.33	1000000000000	KIAA0182	ENSG00000131149
chr16:8630088:8630468:+@chr16:8636397:8636437:+@chr16:8636526:8636670:+	0.47	0.39	0.55	0.35	0.32	0.37	0.12	6.72	C16orf68	ENSG00000067365
chr16:87308769:87308835:+@chr16:87308957:87309015:+@chr16:87309091:87309287:+	0.86	0.78	0.92	0.96	0.94	0.98	-0.1	6.28	C16orf84	ENSG00000174177
chr16:87450667:87450875:-@chr16:87436615:87436738:-@chr16:87435806:87435880:-	0.6	0.54	0.66	0.75	0.73	0.78	-0.15	3.12795e+08	GALNS	ENSG00000141012
chr16:87687718:87687905:+@chr16:87692500:87692672:+@chr16:87694571:87695256:+	0.95	0.89	0.98	0.79	0.74	0.84	0.16	180.83	ACSF3	ENSG00000176715
chr16:87899115:87899253:-@chr16:87885590:87885686:-@chr16:87884922:87885092:-	0.14	0.11	0.16	0.25	0.24	0.26	-0.11	1000000000000	ANKRD11	ENSG00000167522
chr16:88084154:88084470:-@chr16:88025165:88025235:-@chr16:88012193:88012277:-	0.08	0.04	0.13	0.32	0.28	0.36	-0.24	1000000000000	ANKRD11	ENSG00000167522
chr16:88287183:88287235:+@chr16:88287307:88287376:+@chr16:88288082:88288141:+	0.85	0.76	0.92	0.98	0.97	0.99	-0.13	59.93	CDK10	ENSG00000185324
chr17:10573822:10574371:-@chr17:10573073:10573102:-@chr17:10570246:10570306:-	0.89	0.84	0.93	0.78	0.76	0.81	0.11	72.32	TMEM220	ENSG00000187824
chr17:1566174:1566316:-@chr17:1564415:1564497:-@chr17:1563747:1564058:-	0.48	0.43	0.54	0.59	0.58	0.61	-0.11	58.94	hsa-mir-22	ENSG00000199060
chr17:15935902:15936097:-@chr17:15931211:15931384:-@chr17:15930321:15930481:-	0.27	0.24	0.3	0.12	0.11	0.13	0.15	1000000000000	NCOR1	ENSG00000141027
chr17:16578729:16579682:+@chr17:16581577:16581714:+@chr17:16605464:16605757:+	0.33	0.27	0.38	0.2	0.18	0.22	0.13	431018	CCDC144A	ENSG00000170160
chr17:17680766:17681050:-@chr17:17667557:17667646:-@chr17:17664129:17664560:-	0.23	0.2	0.27	0.12	0.1	0.13	0.11	1000000000000	SREBF1	ENSG00000072310
chr17:21057996:21058299:-@chr17:21054841:21055132:-@chr17:21041855:21042745:-	0.42	0.39	0.45	0.25	0.24	0.26	0.17	1000000000000	TMEM11	ENSG00000178307
chr17:22993391:22993501:+@chr17:22994678:22994773:+@chr17:22996467:22996502:+	0.21	0.19	0.23	0.4	0.39	0.41	-0.19	1000000000000	LGALS9	ENSG00000168961
chr17:23927946:23928078:-@chr17:23927110:23927165:-@chr17:23926566:23926689:-	0.23	0.18	0.27	0.11	0.09	0.14	0.12	218741	ALDOC	ENSG00000109107
chr17:25962033:25962086:+@chr17:25982899:25983071:+@chr17:25984242:25984534:+	0.49	0.45	0.53	0.59	0.57	0.62	-0.1	46.7	LRRC37B2	ENSG00000214719
chr17:26600128:26600263:+@chr17:26604082:26604144:+@chr17:26609488:26609646:+	0.51	0.44	0.6	0.39	0.36	0.42	0.12	7.86	AC004222.1	ENSG00000210267
chr17:27559239:27559441:+@chr17:27560482:27560577:+@chr17:27562248:27562370:+	0.24	0.2	0.28	0.35	0.33	0.37	-0.11	2.77221e+09	RHOT1	ENSG00000126858
chr17:27559239:27559441:+@chr17:27560482:27560577:+@chr17:27575748:27576859:+	0.2	0.17	0.23	0.3	0.29	0.32	-0.1	7.16388e+07	RHOT1	ENSG00000126858
chr17:27716462:27716619:+@chr17:27717797:27717889:+@chr17:27718904:27719146:+	0.54	0.52	0.55	0.67	0.66	0.67	-0.13	1000000000000	ZNF207	ENSG00000010244
chr17:31455333:31455487:+@chr17:31456034:31456148:+@chr17:31456731:31457127:+	0.78	0.76	0.81	0.94	0.93	0.95	-0.16	1000000000000	CCL4	ENSG00000129277
chr17:31520551:31520645:-@chr17:31519538:31519637:-@chr17:31519019:31519171:-	0.9	0.8	0.97	0.66	0.62	0.7	0.24	606788	TBC1D3F	ENSG00000189309
chr17:31608595:31608689:-@chr17:31607582:31607681:-@chr17:31607063:31607215:-	0.96	0.9	0.99	0.84	0.79	0.88	0.12	6.77	TBC1D3C	ENSG00000205019
chr17:32874719:32874876:+@chr17:32876778:32876866:+@chr17:32878911:32878983:+	0.8	0.74	0.86	0.92	0.9	0.93	-0.12	115.67	TADA2L	ENSG00000108264
chr17:33628903:33628980:-@chr17:33621217:33621332:-@chr17:33615866:33618982:-	0.41	0.35	0.46	0.3	0.28	0.33	0.11	18.03	AC021317.19-1	ENSG00000174093
chr17:35319535:35319703:-@chr17:35318737:35318821:-@chr17:35315890:35316050:-	0.49	0.41	0.58	0.66	0.61	0.71	-0.17	13.36	GSDMB	ENSG00000073605
chr17:3573731:3573787:-@chr17:3573331:3573426:-@chr17:3570350:3570445:-	0.16	0.13	0.18	0.35	0.34	0.37	-0.19	1000000000000	ITGAE	ENSG00000083457
chr17:38536751:38536813:+@chr17:38538499:38538680:+@chr17:38544200:38544465:+	0.22	0.16	0.29	0.34	0.31	0.36	-0.12	11.24	NBR2	ENSG00000198496
chr17:39588180:39588305:+@chr17:39590727:39590835:+@chr17:39594765:39595370:+	0.79	0.72	0.86	0.63	0.59	0.66	0.16	59.08	C17orf53	ENSG00000125319
chr17:39620100:39620637:+@chr17:39620801:39620903:+@chr17:39621829:39622482:+	0.57	0.53	0.61	0.67	0.65	0.69	-0.1	7.4609e+06	TMUB2	ENSG00000168591
chr17:39807892:39808005:-@chr17:39807553:39807654:-@chr17:39807248:39807364:-	0.83	0.76	0.89	0.95	0.94	0.96	-0.12	144.56	ITGA2B	ENSG00000005961
chr17:40908249:40908875:-@chr17:40901358:40901742:-@chr17:40891318:40891588:-	0.84	0.82	0.86	0.74	0.72	0.75	0.1	1000000000000	PLEKHM1	ENSG00000141342
chr17:42777381:42777463:+@chr17:42780173:42780316:+@chr17:42793743:42793886:+	0.1	0.07	0.14	0.32	0.27	0.38	-0.22	1000000000000	C17orf57	ENSG00000178852
chr17:42777381:42777463:+@chr17:42793743:42793886:+@chr17:42802802:42802873:+	0.79	0.71	0.87	0.44	0.38	0.49	0.35	1000000000000	C17orf57	ENSG00000178852
chr17:43539919:43540199:+@chr17:43543069:43543128:+@chr17:43544392:43544446:+	0.46	0.36	0.56	0.26	0.22	0.3	0.2	56.25	SNX11	ENSG00000002919
chr17:45100388:45100439:-@chr17:45069120:45069170:-@chr17:45055094:45055237:-	0.18	0.11	0.25	0.41	0.37	0.46	-0.23	4.81637e+08	SPOP	ENSG00000121067
chr17:45110294:45110524:-@chr17:45069120:45069170:-@chr17:45055094:45055237:-	0.12	0.08	0.16	0.24	0.23	0.26	-0.12	7.57389e+10	SPOP	ENSG00000121067
chr17:5330418:5330464:+@chr17:5332240:5332633:+@chr17:5332867:5334854:+	0.35	0.32	0.39	0.5	0.48	0.52	-0.15	1000000000000	MIS12	ENSG00000167842
chr17:5330418:5330728:+@chr17:5332240:5332633:+@chr17:5332867:5334854:+	0.33	0.3	0.36	0.48	0.47	0.49	-0.15	1000000000000	MIS12	ENSG00000167842
chr17:53737421:53737531:-@chr17:53736698:53736759:-@chr17:53733587:53734807:-	0.23	0.21	0.26	0.35	0.33	0.37	-0.12	1000000000000	BZRAP1	ENSG00000005379
chr17:53769808:53770039:+@chr17:53778640:53778703:+@chr17:53784095:53784274:+	0.23	0.17	0.29	0.11	0.09	0.12	0.12	3213.34	NA	NA
chr17:55139514:55139638:-@chr17:55131014:55132332:-@chr17:55129449:55130121:-	0.47	0.45	0.5	0.31	0.3	0.32	0.16	1000000000000	AC091271.8	ENSG00000214225
chr17:55394683:55394759:-@chr17:55392211:55392311:-@chr17:55390434:55390587:-	0.97	0.94	0.99	0.87	0.85	0.9	0.1	1.19521e+09	RNFT1	ENSG00000189050
chr17:57954227:57954270:+@chr17:57955329:57955424:+@chr17:57967263:57967430:+	0.54	0.46	0.62	0.67	0.63	0.7	-0.13	6.83	TLK2	ENSG00000146872
chr17:59159426:59159505:-@chr17:59157730:59157787:-@chr17:59145098:59145200:-	0.15	0.12	0.19	0.5	0.48	0.53	-0.35	1000000000000	STRADA	ENSG00000125695
chr17:60255741:60255829:-@chr17:60251205:60251452:-@chr17:60248834:60248973:-	0.92	0.9	0.93	0.78	0.76	0.79	0.14	1000000000000	AC103810.5-2	ENSG00000214176
chr17:6602132:6602267:+@chr17:6603299:6603761:+@chr17:6604449:6604644:+	0.32	0.3	0.34	0.42	0.4	0.45	-0.1	1000000000000	XAF1	ENSG00000132530
chr17:70206103:70206215:-@chr17:70203929:70203951:-@chr17:70203459:70203593:-	0.48	0.44	0.53	0.62	0.6	0.63	-0.14	395442	CD300LF	ENSG00000186074
chr17:70797030:70797125:-@chr17:70796178:70796267:-@chr17:70794309:70794478:-	0.92	0.84	0.97	0.74	0.7	0.78	0.18	699.58	SLC25A19	ENSG00000125454
chr17:71099914:71099977:+@chr17:71100140:71100217:+@chr17:71100355:71100516:+	0.78	0.75	0.81	0.91	0.9	0.92	-0.13	1000000000000	AC087749.12-1	ENSG00000204326
chr17:71399687:71399861:-@chr17:71399489:71399554:-@chr17:71396636:71399023:-	0.47	0.41	0.54	0.71	0.69	0.73	-0.24	1000000000000	TRIM65	ENSG00000141569
chr17:71602090:71602257:-@chr17:71598819:71598911:-@chr17:71596851:71596996:-	0.35	0.33	0.38	0.18	0.17	0.19	0.17	1000000000000	EXOC7	ENSG00000182473
chr17:71602090:71602257:-@chr17:71598819:71598911:-@chr17:71598005:71598073:-	0.76	0.7	0.82	0.42	0.4	0.44	0.34	1000000000000	EXOC7	ENSG00000182473
chr17:72192749:72192842:-@chr17:72191524:72191604:-@chr17:72187246:72188556:-	0.2	0.15	0.25	0.04	0.02	0.05	0.16	1000000000000	MXRA7	ENSG00000182534
chr17:72234507:72234890:+@chr17:72237367:72237471:+@chr17:72240655:72240892:+	0.69	0.63	0.75	0.55	0.53	0.58	0.14	181.4	C17orf95	ENSG00000181038
chr17:72234545:72234855:+@chr17:72237367:72237471:+@chr17:72240655:72240892:+	0.7	0.64	0.76	0.59	0.56	0.61	0.11	38.68	C17orf95	ENSG00000181038
chr17:73632834:73632939:-@chr17:73632565:73632661:-@chr17:73632200:73632457:-	0.69	0.66	0.72	0.81	0.79	0.83	-0.12	1000000000000	TMC6	ENSG00000141524
chr17:76821827:76821898:-@chr17:76820710:76820913:-@chr17:76820242:76820416:-	0.53	0.49	0.58	0.68	0.66	0.7	-0.15	2.1175e+09	C17orf56	ENSG00000167302
chr17:77442895:77443013:+@chr17:77444724:77444786:+@chr17:77445639:77445758:+	0.5	0.47	0.53	0.61	0.6	0.63	-0.11	1000000000000	ANAPC11	ENSG00000141552
chr17:77458722:77458766:-@chr17:77458372:77458425:-@chr17:77457928:77458066:-	0.05	0.03	0.08	0.25	0.23	0.27	-0.2	1000000000000	PCYT2	ENSG00000185813
chr17:7751396:7751531:+@chr17:7751644:7751745:+@chr17:7751937:7752062:+	0.45	0.43	0.47	0.62	0.6	0.63	-0.17	1000000000000	CHD3	ENSG00000170004
chr17:77763950:77763978:-@chr17:77758896:77759213:-@chr17:77752703:77753117:-	0.4	0.33	0.47	0.18	0.16	0.2	0.22	1000000000000	CCDC57	ENSG00000176155
chr17:77949361:77949484:-@chr17:77945496:77945708:-@chr17:77943389:77943699:-	0.51	0.46	0.55	0.37	0.35	0.38	0.14	1000000000000	C17orf101	ENSG00000181396
chr17:78001865:78001996:-@chr17:78000335:78000457:-@chr17:77997788:77997861:-	0.61	0.53	0.69	0.88	0.86	0.9	-0.27	1000000000000	C17orf62	ENSG00000178927
chr17:8054573:8054608:-@chr17:8054220:8054292:-@chr17:8051781:8051883:-	0.64	0.58	0.7	0.81	0.78	0.84	-0.17	1.4829e+07	AURKB	ENSG00000178999
chr18:11876916:11877024:-@chr18:11876498:11876620:-@chr18:11875675:11875815:-	0.66	0.59	0.73	0.77	0.75	0.8	-0.11	9.83	MPPE1	ENSG00000154889
chr18:11876916:11877024:-@chr18:11876712:11876777:-@chr18:11876498:11876620:-	0.85	0.79	0.9	0.74	0.72	0.77	0.11	6.81	MPPE1	ENSG00000154889
chr18:11876916:11877024:-@chr18:11876712:11876780:-@chr18:11876498:11876620:-	0.8	0.73	0.87	0.67	0.64	0.7	0.13	11.79	MPPE1	ENSG00000154889
chr18:12815809:12815943:-@chr18:12809213:12809281:-@chr18:12807155:12807364:-	0.79	0.73	0.84	0.63	0.61	0.65	0.16	4129	PTPN2	ENSG00000175354
chr18:13671604:13672104:-@chr18:13661861:13661972:-@chr18:13653346:13656712:-	0.45	0.38	0.53	0.61	0.58	0.63	-0.16	403.68	C18orf19	ENSG00000177150
chr18:21185967:21186114:-@chr18:21184869:21184909:-@chr18:21155970:21156149:-	0.82	0.76	0.88	0.69	0.64	0.73	0.13	12.53	ZNF521	ENSG00000198795
chr18:21185967:21186114:-@chr18:21184869:21184955:-@chr18:21155970:21156149:-	0.57	0.48	0.67	0.34	0.29	0.39	0.23	18420	ZNF521	ENSG00000198795
chr18:2708313:2708432:+@chr18:2712517:2712661:+@chr18:2714897:2714993:+	0.71	0.68	0.74	0.6	0.59	0.62	0.11	1000000000000	SMCHD1	ENSG00000101596
chr18:31124234:31124353:+@chr18:31124972:31125194:+@chr18:31139938:31144728:+	0.88	0.85	0.9	0.74	0.72	0.75	0.14	1000000000000	ZNF271	ENSG00000118267
chr18:31972231:31972387:+@chr18:31973380:31973574:+@chr18:31975098:31975162:+	0.33	0.26	0.41	0.21	0.18	0.23	0.12	13.37	STATIP1	ENSG00000134759
chr18:41568237:41568365:+@chr18:41570419:41570611:+@chr18:41573126:41573273:+	0.87	0.79	0.94	0.98	0.96	0.99	-0.11	22.74	SLC14A1	ENSG00000141469
chr18:45271900:45271952:-@chr18:45271773:45271813:-@chr18:45271161:45271295:-	0.1	0.09	0.12	0	0	0	0.1	1000000000000	AC100778.5	ENSG00000215472
chr18:45272643:45272832:-@chr18:45272104:45272201:-@chr18:45271900:45271952:-	0.43	0.39	0.47	0.3	0.28	0.31	0.13	1000000000000	SNORD58	ENSG00000206696
chr18:46053932:46054231:-@chr18:46053702:46053839:-@chr18:46053192:46053323:-	0.69	0.66	0.72	0.59	0.58	0.6	0.1	1000000000000	MBD1	ENSG00000141644
chr18:52444590:52444686:-@chr18:52444391:52444495:-@chr18:52442517:52442690:-	0.34	0.32	0.35	0.24	0.23	0.24	0.1	1000000000000	TXNL1	ENSG00000091164
chr18:57981744:57981869:-@chr18:57980466:57980542:-@chr18:57979346:57979598:-	0.27	0.19	0.35	0.42	0.39	0.46	-0.15	11.8	PIGN	ENSG00000197563
chr18:65872347:65872500:-@chr18:65871511:65871730:-@chr18:65869627:65869764:-	0.14	0.09	0.21	0.03	0.02	0.04	0.11	157808	RTTN	ENSG00000176225
chr18:75578798:75579004:+@chr18:75589895:75590057:+@chr18:75597343:75597509:+	0.57	0.51	0.63	0.43	0.41	0.44	0.14	150188	CTDP1	ENSG00000060069
chr18:75589895:75590057:+@chr18:75597343:75597509:+@chr18:75614640:75615495:+	0.9	0.85	0.94	0.79	0.77	0.81	0.11	82593.7	CTDP1	ENSG00000060069
chr18:75804317:75804450:-@chr18:75794957:75795010:-@chr18:75780172:75780388:-	0.41	0.36	0.46	0.54	0.53	0.56	-0.13	11860	AC114341.9	ENSG00000215413
chr18:9185549:9185696:+@chr18:9194474:9194542:+@chr18:9198655:9198801:+	0.6	0.56	0.64	0.78	0.76	0.8	-0.18	1000000000000	ANKRD12	ENSG00000101745
chr19:10777592:10777643:+@chr19:10780245:10780256:+@chr19:10783940:10784053:+	0	0	0.02	0.69	0.67	0.71	-0.69	1000000000000	DNM2	ENSG00000079805
chr19:12266507:12266714:-@chr19:12265047:12265190:-@chr19:12247771:12247897:-	0.84	0.78	0.89	0.52	0.48	0.55	0.32	1000000000000	ZNF44	ENSG00000197857
chr19:13081972:13082120:-@chr19:13081729:13081815:-@chr19:13081583:13081652:-	0.56	0.51	0.62	0.77	0.76	0.79	-0.21	1000000000000	TRMT1	ENSG00000104907
chr19:14728050:14728157:-@chr19:14727466:14727656:-@chr19:14724141:14724338:-	0.71	0.63	0.78	0.53	0.51	0.56	0.18	122.79	EMR2	ENSG00000127507
chr19:14728050:14728157:-@chr19:14727466:14727689:-@chr19:14724141:14724338:-	0.92	0.87	0.95	0.76	0.73	0.78	0.16	1000000000000	EMR2	ENSG00000127507
chr19:14738790:14738921:-@chr19:14738047:14738193:-@chr19:14737470:14737616:-	0.36	0.34	0.39	0.54	0.52	0.55	-0.18	1000000000000	EMR2	ENSG00000127507
chr19:16834163:16834370:+@chr19:16834695:16834790:+@chr19:16835491:16835607:+	0.25	0.19	0.3	0.38	0.35	0.41	-0.13	416.32	SIN3B	ENSG00000127511
chr19:17181395:17181518:+@chr19:17182142:17182189:+@chr19:17182524:17182657:+	0.18	0.16	0.2	0.08	0.07	0.08	0.1	1000000000000	MYO9B	ENSG00000099331
chr19:17515126:17515242:+@chr19:17515333:17515440:+@chr19:17518495:17518606:+	0.54	0.47	0.61	0.83	0.78	0.87	-0.29	1000000000000	FAM129C	ENSG00000167483
chr19:19005471:19005739:+@chr19:19005940:19006047:+@chr19:19014520:19014686:+	0.17	0.13	0.2	0.31	0.29	0.33	-0.14	1000000000000	ARMC6	ENSG00000105676
chr19:20909595:20909693:+@chr19:20920946:20921035:+@chr19:20923390:20925343:+	0.86	0.8	0.92	0.52	0.47	0.57	0.34	1000000000000	ZNF85	ENSG00000105750
chr19:3403480:3403664:+@chr19:3404761:3404914:+@chr19:3407548:3407633:+	0.58	0.52	0.65	0.46	0.43	0.49	0.12	21.77	NFIC	ENSG00000141905
chr19:40194218:40194298:+@chr19:40196000:40196112:+@chr19:40196285:40196435:+	0.64	0.61	0.67	0.74	0.72	0.76	-0.1	1.08107e+08	GRAMD1A	ENSG00000089351
chr19:40441688:40441807:+@chr19:40445289:40445435:+@chr19:40449102:40449275:+	0.91	0.81	0.97	0.61	0.52	0.7	0.3	41234.2	LSR	ENSG00000105699
chr19:40452324:40452442:+@chr19:40452546:40452746:+@chr19:40453190:40453340:+	0.81	0.79	0.83	0.67	0.66	0.69	0.14	1000000000000	USF2	ENSG00000105698
chr19:41737412:41737538:-@chr19:41734619:41734719:-@chr19:41726357:41731064:-	0.67	0.6	0.74	0.51	0.48	0.54	0.16	5078.74	ZNF529	ENSG00000186020
chr19:42956141:42956231:-@chr19:42955418:42955462:-@chr19:42954044:42954176:-	0.07	0.02	0.17	0.28	0.23	0.34	-0.21	122.39	ZNF573	ENSG00000189144
chr19:44081986:44082201:-@chr19:44080859:44080905:-@chr19:44076299:44076347:-	0.06	0.04	0.09	0.17	0.16	0.19	-0.11	1000000000000	SIRT2	ENSG00000068903
chr19:46635963:46636159:-@chr19:46634123:46634217:-@chr19:46631282:46631418:-	0.37	0.33	0.41	0.47	0.45	0.48	-0.1	141527	ATP5SL	ENSG00000105341
chr19:46635963:46636159:-@chr19:46634137:46634217:-@chr19:46631282:46631418:-	0.53	0.49	0.57	0.68	0.66	0.69	-0.15	1000000000000	ATP5SL	ENSG00000105341
chr19:47717259:47717513:-@chr19:47714940:47715227:-@chr19:47708342:47708471:-	0.78	0.76	0.81	0.9	0.86	0.94	-0.12	7287.82	CEACAM1	ENSG00000079385
chr19:53436031:53436132:-@chr19:53433452:53433595:-@chr19:53429472:53429612:-	0.72	0.69	0.75	0.6	0.58	0.62	0.12	1000000000000	CARD8	ENSG00000105483
chr19:53444820:53444916:-@chr19:53444592:53444702:-@chr19:53436031:53436132:-	0.3	0.27	0.32	0.46	0.44	0.47	-0.16	1000000000000	CARD8	ENSG00000105483
chr19:54684919:54684981:+@chr19:54685301:54685366:+@chr19:54685544:54685645:+	0.97	0.94	0.99	0.75	0.73	0.77	0.22	1000000000000	SNORD33	ENSG00000201675
chr19:54861754:54861868:+@chr19:54862088:54862230:+@chr19:54863920:54864006:+	0.69	0.65	0.74	0.82	0.8	0.83	-0.13	1.54244e+08	BCL2L12	ENSG00000126453
chr19:54861754:54861868:+@chr19:54862091:54862230:+@chr19:54863920:54864006:+	0.58	0.53	0.64	0.74	0.72	0.76	-0.16	1.62813e+08	BCL2L12	ENSG00000126453
chr19:55073567:55073641:+@chr19:55074392:55074573:+@chr19:55075348:55075471:+	0.18	0.15	0.22	0.3	0.29	0.32	-0.12	1000000000000	TBC1D17	ENSG00000104946
chr19:56420147:56420223:+@chr19:56420286:56420666:+@chr19:56420871:56421149:+	0.84	0.82	0.87	0.6	0.59	0.61	0.24	1000000000000	CD33	ENSG00000105383
chr19:56956265:56956295:+@chr19:56958427:56958582:+@chr19:56963710:56965591:+	0.22	0.17	0.29	0.11	0.09	0.14	0.11	137.19	FPR2	ENSG00000171049
chr19:58311378:58311498:-@chr19:58310769:58310989:-@chr19:58302944:58304973:-	0.03	0	0.1	0.16	0.11	0.22	-0.13	89.77	ZNF415	ENSG00000170954
chr19:58717683:58717750:+@chr19:58734282:58734348:+@chr19:58750911:58750974:+	0.55	0.46	0.65	0.77	0.73	0.81	-0.22	49746.8	ZNF331	ENSG00000130844
chr19:58996293:58996463:-@chr19:58993309:58993479:-@chr19:58990925:58991095:-	0.97	0.92	1	0.86	0.81	0.9	0.11	16.65	NALP12	ENSG00000142405
chr19:59564335:59564628:-@chr19:59563441:59563491:-@chr19:59560349:59560387:-	0.56	0.53	0.59	0.8	0.79	0.82	-0.24	1000000000000	LAIR1	ENSG00000167613
chr19:59777110:59777191:+@chr19:59777355:59777390:+@chr19:59777580:59777861:+	0.59	0.54	0.64	0.7	0.68	0.73	-0.11	237.04	LILRA2	ENSG00000187095
chr19:5990991:5991252:-@chr19:5977174:5977248:-@chr19:5967101:5967282:-	0.44	0.36	0.53	0.62	0.59	0.65	-0.18	270.3	RFX2	ENSG00000087903
chr19:60088459:60088749:+@chr19:60091186:60091399:+@chr19:60092827:60093651:+	0.84	0.83	0.85	0.63	0.62	0.64	0.21	1000000000000	FCAR	ENSG00000186431
chr19:60088459:60088749:+@chr19:60091186:60091407:+@chr19:60092827:60093651:+	0.9	0.89	0.91	0.7	0.69	0.71	0.2	1000000000000	FCAR	ENSG00000186431
chr19:60088459:60088749:+@chr19:60091186:60091473:+@chr19:60092827:60093651:+	0.94	0.93	0.94	0.75	0.74	0.76	0.19	1000000000000	FCAR	ENSG00000186431
chr19:60544974:60545226:+@chr19:60545395:60545560:+@chr19:60545922:60546031:+	0.55	0.47	0.63	0.74	0.71	0.78	-0.19	493636	SUV420H2	ENSG00000133247
chr19:61576712:61576804:+@chr19:61577867:61577938:+@chr19:61580048:61583008:+	0.75	0.66	0.83	0.4	0.35	0.45	0.35	1000000000000	ZNF542	ENSG00000197025
chr19:61576712:61576804:+@chr19:61577867:61578006:+@chr19:61580048:61583008:+	0.29	0.22	0.37	0.14	0.11	0.17	0.15	74.28	ZNF542	ENSG00000197025
chr19:62837809:62837935:+@chr19:62843092:62843247:+@chr19:62843884:62845959:+	0.48	0.43	0.54	0.18	0.17	0.2	0.3	1000000000000	ZNF211	ENSG00000121417
chr19:63150622:63150889:-@chr19:63147114:63147240:-@chr19:63144013:63145827:-	0.8	0.76	0.85	0.63	0.6	0.66	0.17	1000000000000	ZNF256	ENSG00000152454
chr19:63618703:63618825:+@chr19:63618972:63619119:+@chr19:63619990:63621504:+	0.35	0.25	0.45	0.11	0.09	0.14	0.24	2.07775e+06	ZNF584	ENSG00000221849
chr19:6847409:6847552:+@chr19:6848160:6848315:+@chr19:6848439:6848558:+	0.84	0.76	0.91	0.95	0.94	0.96	-0.11	16.6	EMR1	ENSG00000174837
chr19:6872724:6872894:+@chr19:6875689:6875883:+@chr19:6877377:6877612:+	0.71	0.61	0.8	0.56	0.54	0.58	0.15	10.15	EMR1	ENSG00000174837
chr19:7874765:7874953:+@chr19:7875336:7875433:+@chr19:7876693:7876740:+	0.17	0.12	0.23	0.29	0.26	0.32	-0.12	36.73	MAP2K7	ENSG00000076984
chr19:8279033:8279239:-@chr19:8275915:8276689:-@chr19:8274739:8274972:-	0.37	0.33	0.42	0.54	0.49	0.58	-0.17	2.74239e+08	CD320	ENSG00000167775
chr19:9390727:9390975:-@chr19:9390442:9390571:-@chr19:9390181:9390307:-	0.38	0.32	0.43	0.54	0.51	0.56	-0.16	6163.89	ZNF266	ENSG00000174652
chr19:9406474:9406535:-@chr19:9405741:9405911:-@chr19:9391741:9391894:-	0.58	0.51	0.65	0.42	0.4	0.46	0.16	101.74	ZNF266	ENSG00000174652
chr19:9406784:9406869:-@chr19:9405741:9405911:-@chr19:9391741:9391894:-	0.39	0.33	0.46	0.25	0.23	0.27	0.14	276378	ZNF266	ENSG00000174652
chr2:102406070:102406239:+@chr2:102406703:102407027:+@chr2:102407123:102407306:+	0.96	0.9	0.99	0.83	0.77	0.89	0.13	5.86	IL18RAP	ENSG00000115607
chr2:111597781:111597917:+@chr2:111598098:111598187:+@chr2:111638181:111642493:+	0.9	0.81	0.99	0.63	0.58	0.68	0.27	1000000000000	BCL2L11	ENSG00000153094
chr2:113911853:113912069:+@chr2:113913067:113913164:+@chr2:113915398:113915484:+	0.22	0.2	0.23	0.1	0.1	0.1	0.12	1000000000000	CBWD2	ENSG00000136682
chr2:11831197:11831322:+@chr2:11833663:11833770:+@chr2:11837096:11837222:+	0.23	0.2	0.25	0.37	0.35	0.38	-0.14	1000000000000	LPIN1	ENSG00000134324
chr2:130638417:130638488:-@chr2:130635229:130635315:-@chr2:130631294:130631439:-	0.17	0.15	0.2	0.41	0.39	0.44	-0.24	1000000000000	SMPD4	ENSG00000136699
chr2:131606945:131607034:+@chr2:131614213:131614318:+@chr2:131620680:131623895:+	0.98	0.92	1	0.83	0.76	0.86	0.15	1000000000000	PLEKHB2	ENSG00000115762
chr2:136112936:136113162:+@chr2:136115576:136115830:+@chr2:136119419:136119567:+	0.18	0.15	0.2	0.06	0.05	0.06	0.12	1000000000000	R3HDM1	ENSG00000048991
chr2:143351665:143351775:+@chr2:143355384:143355469:+@chr2:143359388:143359575:+	0.23	0.16	0.3	0.11	0.1	0.12	0.12	61.93	KYNU	ENSG00000115919
chr2:152032760:152032906:+@chr2:152033234:152033311:+@chr2:152033401:152033516:+	0.75	0.72	0.79	0.85	0.83	0.86	-0.1	561915	RIF1	ENSG00000080345
chr2:153259302:153259382:-@chr2:153257918:153258236:-@chr2:153257798:153257828:-	0.15	0.13	0.18	0.32	0.3	0.35	-0.17	1000000000000	PRPF40A	ENSG00000196504
chr2:159097938:159098074:+@chr2:159142029:159142141:+@chr2:159167828:159167862:+	0.97	0.92	0.99	0.83	0.79	0.86	0.14	4.14025e+06	PK4P	ENSG00000144283
chr2:160043332:160043478:-@chr2:160018370:160018558:-@chr2:160012999:160013166:-	0.93	0.9	0.96	0.79	0.76	0.81	0.14	1000000000000	BAZ2B	ENSG00000123636
chr2:161725106:161725243:+@chr2:161726042:161726169:+@chr2:161744371:161744518:+	0.54	0.5	0.58	0.3	0.28	0.31	0.24	1000000000000	TANK	ENSG00000136560
chr2:169634209:169634473:+@chr2:169637331:169637441:+@chr2:169646279:169646650:+	0.65	0.57	0.72	0.29	0.26	0.33	0.36	1000000000000	DHRS9	ENSG00000073737
chr2:169634209:169634473:+@chr2:169637331:169637443:+@chr2:169646279:169646650:+	0.65	0.58	0.73	0.3	0.27	0.34	0.35	1000000000000	DHRS9	ENSG00000073737
chr2:173070949:173071074:+@chr2:173074746:173074875:+@chr2:173077065:173079427:+	0.88	0.84	0.91	0.76	0.75	0.78	0.12	1000000000000	ITGA6	ENSG00000091409
chr2:173135194:173135265:+@chr2:173135715:173135774:+@chr2:173137477:173137661:+	0.23	0.19	0.27	0.34	0.3	0.37	-0.11	39707	PDK1	ENSG00000152256
chr2:174821426:174821611:-@chr2:174819685:174819789:-@chr2:174802282:174802425:-	0.63	0.6	0.67	0.81	0.8	0.82	-0.18	1000000000000	AC013467.8-1	ENSG00000208199
chr2:174821426:174821611:-@chr2:174819689:174819789:-@chr2:174802282:174802425:-	0.69	0.65	0.72	0.86	0.85	0.87	-0.17	1000000000000	AC013467.8-1	ENSG00000208199
chr2:175666035:175666241:-@chr2:175665517:175665590:-@chr2:175653634:175653739:-	0.55	0.5	0.59	0.4	0.38	0.41	0.15	1000000000000	ATF2	ENSG00000115966
chr2:179101247:179101400:-@chr2:179100419:179100721:-@chr2:179098964:179100280:-	0.98	0.93	1	0.87	0.8	0.93	0.11	7.06	TTN	ENSG00000155657
chr2:190357240:190357342:-@chr2:190355985:190356094:-@chr2:190355393:190355573:-	0.41	0.38	0.44	0.61	0.6	0.63	-0.2	1000000000000	ORMDL1	ENSG00000128699
chr2:190785927:190786046:-@chr2:190781851:190781884:-@chr2:190777605:190778203:-	0.72	0.67	0.77	0.88	0.87	0.9	-0.16	3.61944e+11	HIBCH	ENSG00000198130
chr2:192254917:192254988:+@chr2:192255463:192255566:+@chr2:192256700:192256775:+	0.2	0.17	0.24	0.56	0.53	0.58	-0.36	1000000000000	OBFC2A	ENSG00000173559
chr2:200511901:200512038:-@chr2:200509373:200509460:-@chr2:200508899:200509015:-	0.87	0.81	0.91	0.73	0.71	0.76	0.14	194372	C2orf60	ENSG00000162971
chr2:200992218:200992464:+@chr2:201012090:201012296:+@chr2:201013617:201013752:+	0.19	0.17	0.21	0.3	0.28	0.33	-0.11	1000000000000	AC012459.1	ENSG00000196141
chr2:201434206:201434434:-@chr2:201433093:201433183:-@chr2:201432648:201432714:-	0.3	0.29	0.32	0.16	0.15	0.16	0.14	1000000000000	CLK1	ENSG00000013441
chr2:201776698:201776734:+@chr2:201778850:201778941:+@chr2:201781043:201781151:+	0.64	0.57	0.71	0.52	0.47	0.56	0.12	5.1	CASP10	ENSG00000003400
chr2:201845606:201845744:+@chr2:201845866:201845910:+@chr2:201849795:201849936:+	0.78	0.76	0.8	0.89	0.88	0.9	-0.11	1000000000000	CASP8	ENSG00000064012
chr2:201845606:201845744:+@chr2:201849795:201850072:+@chr2:201857784:201858285:+	1	0.99	1	0.89	0.88	0.9	0.11	1000000000000	CASP8	ENSG00000064012
chr2:20346189:20346473:-@chr2:20341825:20342061:-@chr2:20326435:20326702:-	0.57	0.54	0.6	0.45	0.44	0.47	0.12	1000000000000	PUM2	ENSG00000055917
chr2:203975544:203975702:+@chr2:203984253:203984339:+@chr2:203989876:203990049:+	0.67	0.62	0.71	0.52	0.5	0.55	0.15	3.43892e+06	ABI2	ENSG00000138443
chr2:208133195:208133341:+@chr2:208134088:208134129:+@chr2:208140432:208140532:+	0.45	0.41	0.48	0.35	0.33	0.36	0.1	3.94785e+06	CREB1	ENSG00000118260
chr2:208849681:208849799:+@chr2:208850506:208850677:+@chr2:208858695:208858902:+	0.85	0.82	0.88	0.7	0.67	0.72	0.15	1000000000000	PIP5K3	ENSG00000115020
chr2:218954996:218955342:+@chr2:218955927:218956069:+@chr2:218957210:218957332:+	0.72	0.67	0.77	0.83	0.82	0.84	-0.11	724.37	SLC11A1	ENSG00000018280
chr2:219155938:219156053:+@chr2:219157579:219157688:+@chr2:219160553:219160662:+	0.68	0.65	0.71	0.58	0.56	0.59	0.1	1.82356e+07	RQCD1	ENSG00000144580
chr2:219229117:219229430:-@chr2:219224668:219224789:-@chr2:219223326:219223493:-	0.79	0.7	0.86	0.56	0.53	0.6	0.23	1.25513e+06	ZNF142	ENSG00000115568
chr2:219229117:219229430:-@chr2:219224668:219225038:-@chr2:219223326:219223493:-	0.77	0.7	0.85	0.57	0.54	0.6	0.2	6.98765e+11	ZNF142	ENSG00000115568
chr2:219232623:219232710:+@chr2:219233004:219233133:+@chr2:219233906:219234274:+	0.5	0.42	0.59	0.24	0.22	0.26	0.26	1000000000000	BCS1L	ENSG00000074582
chr2:219232623:219232710:+@chr2:219233004:219233185:+@chr2:219233906:219234274:+	0.48	0.41	0.56	0.27	0.26	0.29	0.21	1000000000000	BCS1L	ENSG00000074582
chr2:219232623:219232710:+@chr2:219233004:219233212:+@chr2:219233906:219234274:+	0.52	0.45	0.6	0.3	0.28	0.32	0.22	1000000000000	BCS1L	ENSG00000074582
chr2:219966:220044:-@chr2:214864:214920:-@chr2:208155:209001:-	0.54	0.48	0.61	0.31	0.28	0.33	0.23	1000000000000	SH3YL1	ENSG00000035115
chr2:219966:220044:-@chr2:214868:214920:-@chr2:208155:209001:-	0.23	0.17	0.29	0.11	0.09	0.12	0.12	6731.56	SH3YL1	ENSG00000035115
chr2:227913252:227913340:+@chr2:227915705:227915779:+@chr2:227920186:227920344:+	0.51	0.46	0.56	0.39	0.37	0.41	0.12	318524	MFF	ENSG00000168958
chr2:227913252:227913340:+@chr2:227920186:227920344:+@chr2:227925474:227925533:+	0.94	0.9	0.97	0.78	0.75	0.81	0.16	1000000000000	MFF	ENSG00000168958
chr2:230961518:230961592:+@chr2:230962878:230962982:+@chr2:230965046:230965188:+	0.37	0.32	0.42	0.52	0.49	0.55	-0.15	1935.98	SP140L	ENSG00000185404
chr2:231437865:231438104:+@chr2:231446376:231446516:+@chr2:231448579:231448767:+	0.86	0.84	0.87	0.73	0.72	0.74	0.13	1000000000000	ITM2C	ENSG00000135916
chr2:233846351:233846437:+@chr2:233847106:233847162:+@chr2:233848061:233848163:+	0.78	0.71	0.84	0.63	0.6	0.65	0.15	7343.12	ATG16L1	ENSG00000085978
chr2:241117127:241117599:-@chr2:241114319:241114535:-@chr2:241113775:241113939:-	0.51	0.44	0.59	0.33	0.3	0.36	0.18	531676	ANKMY1	ENSG00000144504
chr2:241141004:241141147:-@chr2:241117127:241117599:-@chr2:241113775:241113939:-	0.37	0.33	0.41	0.27	0.26	0.28	0.1	314.43	ANKMY1	ENSG00000144504
chr2:241184409:241184611:+@chr2:241184771:241185032:+@chr2:241185978:241186177:+	0.48	0.42	0.53	0.63	0.61	0.65	-0.15	1.26266e+08	CAPN10	ENSG00000142330
chr2:241184409:241184611:+@chr2:241184940:241185032:+@chr2:241185978:241186177:+	0.32	0.26	0.39	0.47	0.44	0.5	-0.15	20.34	CAPN10	ENSG00000142330
chr2:241903954:241904070:+@chr2:241908291:241908375:+@chr2:241912304:241912329:+	0.06	0.01	0.16	0.25	0.18	0.33	-0.19	32.94	37500	ENSG00000168385
chr2:24223304:24223460:+@chr2:24237880:24237987:+@chr2:24240572:24240708:+	0.96	0.93	0.98	0.82	0.8	0.84	0.14	1000000000000	C2orf84	ENSG00000219626
chr2:242332797:242332965:+@chr2:242336953:242338017:+@chr2:242338239:242338382:+	0.37	0.33	0.41	0.58	0.56	0.6	-0.21	1000000000000	D2HGDH	ENSG00000180902
chr2:242705463:242705565:+@chr2:242707007:242707056:+@chr2:242709789:242709881:+	0.87	0.8	0.92	0.74	0.72	0.77	0.13	12.38	AC134873.2	ENSG00000220804
chr2:27849045:27849063:+@chr2:27850795:27850901:+@chr2:27855804:27856112:+	0.31	0.29	0.33	0.55	0.54	0.56	-0.24	1000000000000	MRPL33	ENSG00000163797
chr2:28928778:28928869:-@chr2:28927442:28927668:-@chr2:28926698:28926775:-	0.97	0.94	0.99	0.87	0.84	0.89	0.1	126598	TRMT61B	ENSG00000171103
chr2:28928778:28928869:-@chr2:28927469:28927668:-@chr2:28926698:28926775:-	0.97	0.92	0.99	0.83	0.8	0.86	0.14	70934.2	TRMT61B	ENSG00000171103
chr2:31996499:31996610:-@chr2:31970565:31970707:-@chr2:31948421:31948525:-	0.7	0.67	0.73	0.8	0.79	0.82	-0.1	1000000000000	MEMO1	ENSG00000162959
chr2:32344160:32344305:-@chr2:32343311:32343411:-@chr2:32335348:32335466:-	0.07	0.04	0.1	0.73	0.65	0.79	-0.66	1000000000000	NLRC4	ENSG00000091106
chr2:33393715:33393840:+@chr2:33421409:33421534:+@chr2:33425938:33426081:+	0.42	0.35	0.49	0.64	0.6	0.68	-0.22	1.76137e+10	AC019127.10-1	ENSG00000211120
chr2:37277139:37277167:+@chr2:37279141:37279319:+@chr2:37280351:37280466:+	0.15	0.13	0.18	0.04	0.03	0.04	0.11	1000000000000	AC007390.5	ENSG00000218739
chr2:38662559:38662631:-@chr2:38658566:38658648:-@chr2:38658107:38658178:-	0.55	0.5	0.59	0.25	0.22	0.28	0.3	1000000000000	HNRPLL	ENSG00000143889
chr2:39390106:39390164:-@chr2:39388588:39388650:-@chr2:39380388:39380446:-	0.25	0.18	0.34	0.43	0.38	0.5	-0.18	22.8	MAP4K3	ENSG00000011566
chr2:55389449:55389663:-@chr2:55383709:55383792:-@chr2:55382512:55382712:-	0.7	0.67	0.73	0.58	0.57	0.6	0.12	1000000000000	CCDC88A	ENSG00000115355
chr2:58164728:58164777:+@chr2:58165520:58165589:+@chr2:58166978:58167065:+	0.97	0.95	0.99	0.87	0.85	0.89	0.1	1000000000000	VRK2	ENSG00000028116
chr2:60867586:60867705:+@chr2:60868150:60868259:+@chr2:60872400:60872521:+	0.44	0.37	0.52	0.57	0.54	0.6	-0.13	6.28	PAPOLG	ENSG00000115421
chr2:63059827:63059974:+@chr2:63068570:63068677:+@chr2:63071355:63071479:+	0.22	0.17	0.28	0.37	0.34	0.4	-0.15	4491.94	EHBP1	ENSG00000115504
chr2:65425357:65425534:-@chr2:65415243:65415411:-@chr2:65412625:65412689:-	0.7	0.62	0.77	0.52	0.48	0.55	0.18	5.87459e+07	SPRED2	ENSG00000198369
chr2:71693972:71694048:+@chr2:71701185:71701247:+@chr2:71724603:71724701:+	0.45	0.41	0.49	0.55	0.53	0.57	-0.1	671.11	DYSF	ENSG00000135636
chr2:73049085:73049170:-@chr2:73041768:73041885:-@chr2:73022673:73025736:-	0.92	0.86	0.98	0.81	0.78	0.84	0.11	12.77	SFXN5	ENSG00000144040
chr2:73615459:73615584:+@chr2:73630902:73631072:+@chr2:73637855:73637989:+	0.96	0.91	0.99	0.86	0.83	0.88	0.1	15.33	ALMS1	ENSG00000116127
chr2:74225824:74225938:-@chr2:74222907:74222995:-@chr2:74216036:74216293:-	0.6	0.56	0.63	0.46	0.44	0.48	0.14	1000000000000	BOLA3	ENSG00000163170
chr2:85424873:85424982:-@chr2:85424633:85424799:-@chr2:85424273:85424432:-	0.89	0.84	0.94	0.76	0.73	0.78	0.13	1668.35	RETSAT	ENSG00000042445
chr2:85642020:85642168:-@chr2:85641449:85641619:-@chr2:85639551:85639709:-	0.41	0.35	0.47	0.59	0.57	0.6	-0.18	1000000000000	GGCX	ENSG00000115486
chr2:86239226:86239355:-@chr2:86234194:86234208:-@chr2:86231931:86232154:-	0.27	0.2	0.35	0.52	0.48	0.55	-0.25	1000000000000	IMMT	ENSG00000132305
chr2:9480059:9480830:-@chr2:9477570:9477680:-@chr2:9476206:9476312:-	0.84	0.81	0.87	0.64	0.62	0.65	0.2	1000000000000	ITGB1BP1	ENSG00000119185
chr2:97276931:97277083:+@chr2:97278599:97278669:+@chr2:97279007:97279100:+	0.97	0.96	0.98	0.86	0.85	0.87	0.11	1000000000000	AC099646.6-2	ENSG00000214262
chr2:97492476:97492628:-@chr2:97490890:97490960:-@chr2:97490459:97490552:-	0.97	0.96	0.98	0.85	0.84	0.86	0.12	1000000000000	ANKRD36B	ENSG00000196912
chr2:97561801:97561938:-@chr2:97559274:97559341:-@chr2:97543727:97543755:-	0.37	0.29	0.45	0.22	0.19	0.26	0.15	11.39	ANKRD36B	ENSG00000196912
chr2:99154405:99154541:-@chr2:99154238:99154324:-@chr2:99153432:99153547:-	0.8	0.76	0.83	0.93	0.92	0.94	-0.13	1000000000000	MITD1	ENSG00000158411
chr2_random:161268:161436:+@chr2_random:165424:166488:+@chr2_random:166710:166853:+	0.37	0.33	0.41	0.58	0.56	0.6	-0.21	1000000000000	NA	NA
chr20:20340671:20340792:-@chr20:20325339:20325378:-@chr20:20321411:20321897:-	0.67	0.61	0.73	0.79	0.77	0.82	-0.12	44.71	C20orf74	ENSG00000188559
chr20:25124339:25124503:+@chr20:25135158:25135226:+@chr20:25135712:25136033:+	0.76	0.68	0.83	0.51	0.48	0.55	0.25	1000000000000	ENTPD6	ENSG00000197586
chr20:2790700:2790776:+@chr20:2791225:2791356:+@chr20:2791453:2791580:+	0.84	0.79	0.89	0.96	0.95	0.97	-0.12	1000000000000	VPS16	ENSG00000215305
chr20:30480802:30480895:+@chr20:30481365:30481517:+@chr20:30482785:30482948:+	0.87	0.83	0.9	0.76	0.74	0.79	0.11	659.61	ASXL1	ENSG00000171456
chr20:30853852:30853937:+@chr20:30857676:30857794:+@chr20:30859229:30860823:+	0.52	0.45	0.59	0.38	0.36	0.39	0.14	20568.1	DNMT3B	ENSG00000088305
chr20:3138006:3138263:+@chr20:3141815:3141872:+@chr20:3142631:3142704:+	0.95	0.93	0.97	0.83	0.82	0.84	0.12	1000000000000	ITPA	ENSG00000125877
chr20:3277172:3277270:-@chr20:3272323:3272378:-@chr20:3269151:3269286:-	0.72	0.66	0.79	0.92	0.9	0.94	-0.2	1000000000000	C20orf194	ENSG00000088854
chr20:32798272:32798393:-@chr20:32791828:32794806:-@chr20:32788155:32788223:-	0.96	0.93	0.98	0.81	0.79	0.83	0.15	1000000000000	NCOA6	ENSG00000198646
chr20:336709:337423:+@chr20:338525:338669:+@chr20:339056:339408:+	0.74	0.71	0.77	0.84	0.83	0.85	-0.1	1000000000000	RBCK1	ENSG00000125826
chr20:336709:337423:+@chr20:338525:338669:+@chr20:346170:346263:+	0.87	0.85	0.9	0.97	0.96	0.97	-0.1	1000000000000	RBCK1	ENSG00000125826
chr20:34606676:34606885:+@chr20:34609849:34610010:+@chr20:34610894:34611640:+	0.95	0.87	0.99	0.76	0.7	0.81	0.19	25424.7	MYL9	ENSG00000101335
chr20:34669532:34669635:+@chr20:34669707:34669817:+@chr20:34671418:34671547:+	0.4	0.38	0.41	0.26	0.26	0.27	0.14	1000000000000	C20orf24	ENSG00000101084
chr20:35583021:35583219:+@chr20:35584174:35584254:+@chr20:35584483:35585504:+	0.49	0.4	0.59	0.01	0	0.03	0.48	1000000000000	NNAT	ENSG00000053438
chr20:3618247:3618349:-@chr20:3617802:3617874:-@chr20:3615617:3617266:-	0.31	0.22	0.41	0.56	0.54	0.57	-0.25	1.41548e+06	SIGLEC1	ENSG00000088827
chr20:3944084:3944216:-@chr20:3902979:3903047:-@chr20:3892522:3892671:-	0.34	0.3	0.39	0.53	0.51	0.55	-0.19	1000000000000	RNF24	ENSG00000101236
chr20:4112141:4112301:+@chr20:4115390:4115479:+@chr20:4115917:4116369:+	0.06	0.04	0.1	0.21	0.19	0.23	-0.15	1000000000000	SMOX	ENSG00000088826
chr20:42593850:42594033:+@chr20:42644640:42644786:+@chr20:42651852:42651921:+	0.52	0.43	0.62	0.36	0.33	0.39	0.16	9.32	PKIG	ENSG00000168734
chr20:43000116:43000246:+@chr20:43000729:43000803:+@chr20:43001181:43001376:+	0.71	0.66	0.76	0.86	0.85	0.87	-0.15	1000000000000	PABPC1L	ENSG00000101104
chr20:43971988:43972116:-@chr20:43971562:43971717:-@chr20:43969887:43969950:-	0.84	0.77	0.9	0.94	0.93	0.96	-0.1	9.1	PLTP	ENSG00000100979
chr20:47224139:47224213:-@chr20:47215941:47216229:-@chr20:47203877:47204015:-	0.18	0.16	0.2	0.07	0.07	0.08	0.11	1000000000000	STAU1	ENSG00000124214
chr20:47330429:47330514:+@chr20:47330847:47330908:+@chr20:47338989:47339202:+	0.66	0.64	0.68	0.55	0.54	0.55	0.11	1000000000000	SNORD12	ENSG00000212304
chr20:47899523:47899624:+@chr20:47900706:47900788:+@chr20:47905382:47905525:+	0.31	0.27	0.36	0.21	0.18	0.23	0.1	411.49	SLC9A8	ENSG00000197818
chr20:47899523:47899624:+@chr20:47900754:47900788:+@chr20:47905382:47905525:+	0.59	0.55	0.64	0.44	0.42	0.48	0.15	7.20949e+08	SLC9A8	ENSG00000197818
chr20:56676449:56676589:+@chr20:56677753:56677915:+@chr20:56678974:56679065:+	0.65	0.63	0.67	0.55	0.54	0.56	0.1	1000000000000	STX16	ENSG00000124222
chr20:56904062:56904134:+@chr20:56907391:56907435:+@chr20:56911981:56912035:+	0.57	0.55	0.59	0.37	0.36	0.38	0.2	1000000000000	GNAS	ENSG00000087460
chr20:60152217:60152340:+@chr20:60162732:60162916:+@chr20:60167123:60167199:+	0.34	0.28	0.42	0.19	0.17	0.22	0.15	1920.6	SS18L1	ENSG00000184402
chr20:61975465:61975613:+@chr20:61977613:61977672:+@chr20:61984516:61984617:+	0.56	0.54	0.59	0.74	0.73	0.74	-0.18	1000000000000	TPD52L2	ENSG00000101150
chr20:62032648:62032819:+@chr20:62032906:62032979:+@chr20:62033262:62035839:+	0.34	0.32	0.37	0.23	0.21	0.24	0.11	1000000000000	DNAJC5	ENSG00000101152
chr20:62181091:62181289:-@chr20:62178654:62178751:-@chr20:62178322:62178443:-	0.62	0.58	0.65	0.78	0.76	0.79	-0.16	1000000000000	RGS19	ENSG00000171700
chr20:762356:762594:+@chr20:768098:768206:+@chr20:773351:774922:+	0.25	0.21	0.31	0.11	0.09	0.13	0.14	8.92676e+09	C20orf55	ENSG00000125898
chr21:26205924:26206145:-@chr21:26199207:26199260:-@chr21:26191756:26191856:-	0.6	0.58	0.61	0.79	0.78	0.8	-0.19	1000000000000	APP	ENSG00000142192
chr21:26316027:26316229:-@chr21:26294201:26294368:-@chr21:26291546:26291602:-	0.84	0.81	0.86	0.98	0.96	0.99	-0.14	1000000000000	APP	ENSG00000142192
chr21:32897342:32897473:-@chr21:32896453:32896548:-@chr21:32895978:32896154:-	0.74	0.71	0.76	0.9	0.89	0.9	-0.16	1000000000000	C21orf59	ENSG00000159079
chr21:33882497:33883137:-@chr21:33881698:33881778:-@chr21:33880154:33880357:-	0.86	0.81	0.9	0.96	0.94	0.97	-0.1	1060.12	DONSON	ENSG00000159147
chr21:37661729:37661800:+@chr21:37714471:37714556:+@chr21:37766856:37767052:+	0.69	0.63	0.75	0.81	0.77	0.84	-0.12	13.79	DYRK1A	ENSG00000157540
chr21:38696349:38696429:-@chr21:38694366:38694437:-@chr21:38686168:38686236:-	0.57	0.52	0.61	0.37	0.34	0.39	0.2	1000000000000	ERG	ENSG00000157554
chr21:39642088:39642135:-@chr21:39639626:39639754:-@chr21:39638942:39639070:-	0.36	0.34	0.37	0.56	0.55	0.57	-0.2	1000000000000	HMGN1	ENSG00000205581
chr21:42128615:42128702:-@chr21:42127683:42127742:-@chr21:42121591:42121758:-	0.27	0.2	0.33	0.4	0.36	0.45	-0.13	34.1	PRDM15	ENSG00000141956
chr21:44303412:44303523:+@chr21:44307362:44307477:+@chr21:44307847:44308094:+	0.25	0.22	0.27	0.07	0.06	0.07	0.18	1000000000000	TRAPPC10	ENSG00000160218
chr21:46531212:46531465:+@chr21:46535676:46535804:+@chr21:46540504:46540572:+	0.42	0.36	0.48	0.78	0.75	0.8	-0.36	1000000000000	C21orf57	ENSG00000182362
chr22:16637147:16637258:-@chr22:16612871:16612940:-@chr22:16602115:16602254:-	0.55	0.5	0.6	0.43	0.41	0.44	0.12	1.96957e+09	BID	ENSG00000015475
chr22:18339409:18339494:-@chr22:18338739:18338858:-@chr22:18337419:18338266:-	0.35	0.25	0.45	0.53	0.48	0.58	-0.18	7.5	ARVCF	ENSG00000099889
chr22:18766517:18767279:-@chr22:18765726:18765815:-@chr22:18765112:18765195:-	0.03	0.01	0.05	0.98	0.97	0.99	-0.95	1000000000000	PI4KAP1	ENSG00000215513
chr22:20313597:20313696:-@chr22:20313299:20313476:-@chr22:20312379:20313076:-	0.41	0.37	0.45	0.21	0.2	0.22	0.2	1000000000000	YDJC	ENSG00000161179
chr22:21559960:21560439:+@chr22:21565877:21565998:+@chr22:21567555:21568005:+	0.44	0.42	0.47	0.61	0.6	0.63	-0.17	1000000000000	D87023.1-2	ENSG00000211675
chr22:21559960:21560439:+@chr22:21565880:21565998:+@chr22:21567555:21568005:+	0.46	0.43	0.49	0.63	0.61	0.65	-0.17	1000000000000	D87023.1-2	ENSG00000211675
chr22:22332052:22332187:-@chr22:22312495:22312610:-@chr22:22310676:22311129:-	0.41	0.38	0.44	0.3	0.28	0.31	0.11	1000000000000	AP000347.4	ENSG00000218145
chr22:22377616:22377728:-@chr22:22372913:22373032:-@chr22:22366306:22367704:-	0.33	0.3	0.36	0.22	0.2	0.23	0.11	1000000000000	NA	NA
chr22:22959842:22959972:-@chr22:22959466:22959561:-@chr22:22958791:22958986:-	0.96	0.91	0.98	0.83	0.8	0.85	0.13	5.24169e+09	GGTLA1	ENSG00000099998
chr22:23374165:23374299:+@chr22:23375245:23375350:+@chr22:23375827:23375989:+	0.2	0.15	0.26	0.42	0.38	0.46	-0.22	1000000000000	AP000356.1	ENSG00000215456
chr22:24421074:24421181:+@chr22:24428809:24428958:+@chr22:24429477:24429543:+	0.2	0.18	0.23	0.35	0.33	0.37	-0.15	1000000000000	ADRBK2	ENSG00000100077
chr22:26584375:26584497:-@chr22:26580842:26580927:-@chr22:26577657:26579651:-	0.73	0.7	0.76	0.87	0.87	0.88	-0.14	1000000000000	PITPNB	ENSG00000180957
chr22:28279660:28279736:-@chr22:28276717:28276832:-@chr22:28275041:28275147:-	0.53	0.48	0.57	0.39	0.37	0.41	0.14	1.15522e+06	THOC5	ENSG00000100296
chr22:28748598:28748686:+@chr22:28749446:28749472:+@chr22:28751619:28756857:+	0.48	0.45	0.51	0.37	0.36	0.39	0.11	1000000000000	MTMR3	ENSG00000100330
chr22:28972666:28972840:-@chr22:28970744:28970922:-@chr22:28966436:28970050:-	0.97	0.91	1	0.81	0.75	0.86	0.16	254.31	LIF	ENSG00000128342
chr22:30234241:30234362:+@chr22:30254676:30254849:+@chr22:30272847:30272957:+	0.91	0.87	0.94	0.78	0.76	0.8	0.13	1000000000000	SFI1	ENSG00000198089
chr22:34886663:34886923:-@chr22:34875040:34875365:-@chr22:34871467:34871593:-	0.95	0.92	0.97	0.84	0.82	0.87	0.11	791648	APOL3	ENSG00000128284
chr22:36379732:36379826:+@chr22:36381225:36381268:+@chr22:36381879:36381995:+	0.64	0.59	0.69	0.78	0.75	0.8	-0.14	2712.27	SH3BP1	ENSG00000100092
chr22:37712249:37712363:+@chr22:37715408:37715561:+@chr22:37717283:37717577:+	0.98	0.96	1	0.58	0.55	0.6	0.4	1000000000000	APOBEC3B	ENSG00000179750
chr22:39005945:39006093:+@chr22:39007069:39007239:+@chr22:39011595:39011720:+	0.28	0.23	0.32	0.16	0.15	0.18	0.12	6.97813e+07	TNRC6B	ENSG00000100354
chr22:40520321:40520427:+@chr22:40521361:40521402:+@chr22:40521685:40521797:+	0.29	0.23	0.35	0.99	0.98	1	-0.7	1000000000000	MEI1	ENSG00000167077
chr22:40520321:40520427:+@chr22:40521361:40521492:+@chr22:40521685:40521797:+	0.56	0.5	0.61	1	0.99	1	-0.44	1000000000000	MEI1	ENSG00000167077
chr22:41604998:41605119:-@chr22:41602838:41602960:-@chr22:41602087:41602283:-	0.7	0.66	0.73	0.81	0.8	0.82	-0.11	1000000000000	PACSIN2	ENSG00000100266
chr22:41867112:41867199:-@chr22:41863031:41863248:-@chr22:41858156:41859436:-	0.57	0.53	0.62	0.7	0.68	0.72	-0.13	7.33739e+08	MCAT	ENSG00000100294
chr22:43506795:43506935:+@chr22:43509571:43509706:+@chr22:43511316:43512225:+	0.8	0.75	0.85	0.9	0.88	0.92	-0.1	44.11	PRR5	ENSG00000186654
chr22:49031327:49031461:-@chr22:49030983:49031079:-@chr22:49030619:49030716:-	0.72	0.68	0.76	0.86	0.84	0.87	-0.14	1000000000000	HDAC10	ENSG00000100429
chr22:49364331:49364550:-@chr22:49363844:49363954:-@chr22:49363070:49363229:-	0.72	0.68	0.75	0.88	0.86	0.89	-0.16	1000000000000	CHKB	ENSG00000100288
chr3:101511937:101512076:+@chr3:101513367:101513411:+@chr3:101517633:101517721:+	0.17	0.13	0.21	0.4	0.38	0.42	-0.23	1000000000000	TBC1D23	ENSG00000036054
chr3:102660489:102660586:-@chr3:102619127:102619324:-@chr3:102600395:102600589:-	0.95	0.93	0.97	0.85	0.84	0.87	0.1	1000000000000	SENP7	ENSG00000138468
chr3:109252115:109252139:-@chr3:109251156:109251188:-@chr3:109244631:109248829:-	0.59	0.55	0.64	0.76	0.74	0.78	-0.17	1000000000000	CD47	ENSG00000196776
chr3:113534606:113534761:+@chr3:113542439:113542520:+@chr3:113546499:113546825:+	0.66	0.62	0.69	0.5	0.46	0.53	0.16	1000000000000	CD200	ENSG00000091972
chr3:114496224:114496358:-@chr3:114495489:114495575:-@chr3:114489701:114493285:-	0.37	0.29	0.44	0.56	0.52	0.6	-0.19	1790.11	WDR52	ENSG00000206530
chr3:11855696:11855788:-@chr3:11849477:11849625:-@chr3:11846188:11846338:-	0.47	0.4	0.54	0.26	0.24	0.28	0.21	7.08016e+10	C3orf31	ENSG00000144559
chr3:11862976:11863352:-@chr3:11861365:11861570:-@chr3:11860503:11860685:-	0.46	0.39	0.54	0.17	0.15	0.19	0.29	1000000000000	C3orf31	ENSG00000144559
chr3:120438390:120438607:-@chr3:120436682:120436764:-@chr3:120431384:120431781:-	0.67	0.61	0.73	0.52	0.49	0.55	0.15	5687.56	B4GALT4	ENSG00000121578
chr3:120653984:120654067:-@chr3:120652746:120652854:-@chr3:120648555:120648709:-	0.77	0.7	0.82	0.51	0.49	0.53	0.26	1000000000000	TMEM39A	ENSG00000176142
chr3:123307735:123308037:+@chr3:123310802:123310945:+@chr3:123319585:123319630:+	0.53	0.44	0.62	0.8	0.78	0.82	-0.27	1000000000000	CD86	ENSG00000114013
chr3:123822981:123823148:+@chr3:123828364:123828570:+@chr3:123833623:123833756:+	0.75	0.72	0.79	0.49	0.47	0.5	0.26	1000000000000	PARP15	ENSG00000173200
chr3:128922586:128922696:-@chr3:128912109:128912198:-@chr3:128896508:128896723:-	0.86	0.83	0.88	0.72	0.7	0.74	0.14	1000000000000	MGLL	ENSG00000074416
chr3:130598573:130598673:-@chr3:130597750:130597953:-@chr3:130595168:130595328:-	0.34	0.29	0.39	0.66	0.63	0.69	-0.32	1000000000000	RPL32P3	ENSG00000183611
chr3:132095712:132095871:+@chr3:132096124:132096309:+@chr3:132131950:132132060:+	0.62	0.57	0.67	0.77	0.75	0.8	-0.15	3.91464e+10	ATP2C1	ENSG00000017260
chr3:132095712:132095871:+@chr3:132096242:132096309:+@chr3:132131950:132132060:+	0.65	0.6	0.71	0.79	0.77	0.82	-0.14	295707	ATP2C1	ENSG00000017260
chr3:133901452:133901595:-@chr3:133900887:133900984:-@chr3:133898794:133898896:-	0.18	0.13	0.23	0.39	0.36	0.42	-0.21	1000000000000	ACAD11	ENSG00000113971
chr3:133920528:133920678:-@chr3:133919489:133919651:-@chr3:133918291:133918443:-	0.33	0.25	0.42	0.2	0.18	0.23	0.13	5.95	ACAD11	ENSG00000113971
chr3:137805841:137806005:-@chr3:137792977:137793081:-@chr3:137788334:137788458:-	0.14	0.09	0.19	0.36	0.32	0.39	-0.22	1000000000000	STAG1	ENSG00000118007
chr3:139388805:139389131:+@chr3:139389933:139390062:+@chr3:139411349:139411425:+	0.41	0.36	0.46	0.51	0.48	0.53	-0.1	50.12	ARMC8	ENSG00000114098
chr3:139388805:139389131:+@chr3:139389933:139390062:+@chr3:139423458:139423529:+	0.5	0.42	0.58	0.68	0.65	0.71	-0.18	2857.75	ARMC8	ENSG00000114098
chr3:139388805:139389131:+@chr3:139389987:139390062:+@chr3:139423458:139423529:+	0.67	0.6	0.74	0.79	0.77	0.82	-0.12	14.44	ARMC8	ENSG00000114098
chr3:14141156:14141372:-@chr3:14138418:14138587:-@chr3:14132927:14133025:-	0.51	0.42	0.61	0.22	0.19	0.24	0.29	1.59651e+11	CHCHD4	ENSG00000163528
chr3:14484365:14484468:+@chr3:14484600:14484724:+@chr3:14488717:14488829:+	0.8	0.77	0.84	0.68	0.66	0.7	0.12	1000000000000	SLC6A6	ENSG00000131389
chr3:15115546:15115659:-@chr3:15114630:15114785:-@chr3:15113046:15113221:-	0.3	0.25	0.36	0.19	0.16	0.21	0.11	67.03	ZFYVE20	ENSG00000131381
chr3:152391194:152391408:+@chr3:152393027:152393131:+@chr3:152393967:152394143:+	0.73	0.64	0.81	0.42	0.36	0.48	0.31	1000000000000	MED12L	ENSG00000144893
chr3:168776400:168776633:-@chr3:168767312:168767376:-@chr3:168760546:168760710:-	0.58	0.52	0.63	0.75	0.72	0.78	-0.17	5.83972e+11	WDR49	ENSG00000174776
chr3:172887855:172888068:-@chr3:172887169:172887282:-@chr3:172878050:172878178:-	0.82	0.77	0.87	0.63	0.59	0.66	0.19	1000000000000	PLD1	ENSG00000075651
chr3:178397603:178397742:-@chr3:178298948:178299023:-@chr3:178265402:178265504:-	0.79	0.73	0.83	0.89	0.87	0.91	-0.1	220.76	Y_RNA	ENSG00000201343
chr3:182113146:182113218:+@chr3:182115134:182115477:+@chr3:182133816:182133868:+	0.34	0.31	0.36	0.13	0.12	0.13	0.21	1000000000000	FXR1	ENSG00000114416
chr3:182188505:182188578:-@chr3:182187480:182187504:-@chr3:182186408:182186478:-	0.01	0	0.03	0.14	0.12	0.16	-0.13	1000000000000	DNAJC19	ENSG00000205981
chr3:184708541:184708990:-@chr3:184700072:184700309:-@chr3:184694561:184694763:-	0.49	0.46	0.53	0.62	0.6	0.64	-0.13	5.10189e+09	KLHL6	ENSG00000172578
chr3:186875778:186875913:-@chr3:186873023:186873151:-@chr3:186858823:186858891:-	0.41	0.37	0.45	0.56	0.54	0.58	-0.15	1000000000000	IGF2BP2	ENSG00000073792
chr3:187472738:187472826:-@chr3:187469284:187469400:-@chr3:187468168:187468260:-	0.59	0.53	0.65	0.44	0.38	0.5	0.15	18.78	DGKG	ENSG00000058866
chr3:187985047:187985179:+@chr3:187985445:187985584:+@chr3:187986366:187986534:+	0.29	0.28	0.3	0.47	0.46	0.47	-0.18	1000000000000	EIF4A2	ENSG00000156976
chr3:187988286:187988365:+@chr3:187988793:187988899:+@chr3:187989608:187990379:+	0.64	0.62	0.65	0.43	0.42	0.43	0.21	1000000000000	EIF4A2	ENSG00000156976
chr3:195806305:195806463:-@chr3:195795059:195795091:-@chr3:195789691:195790657:-	0.04	0.02	0.06	0.17	0.15	0.19	-0.13	1000000000000	TMEM44	ENSG00000145014
chr3:195825242:195825328:-@chr3:195819654:195819794:-@chr3:195819117:195819287:-	0.27	0.2	0.34	0.15	0.13	0.17	0.12	17.72	TMEM44	ENSG00000145014
chr3:198839048:198839149:-@chr3:198835740:198835988:-@chr3:198835380:198835465:-	0.25	0.19	0.32	0.15	0.13	0.17	0.1	11.94	NA	NA
chr3:30622998:30623473:+@chr3:30639695:30639769:+@chr3:30661243:30661411:+	0.47	0.43	0.51	0.58	0.57	0.6	-0.11	2.32726e+09	TGFBR2	ENSG00000163513
chr3:3170108:3170172:-@chr3:3169140:3169271:-@chr3:3166696:3167729:-	0.47	0.43	0.51	0.6	0.59	0.61	-0.13	1000000000000	CRBN	ENSG00000113851
chr3:33425732:33425842:-@chr3:33425186:33425293:-@chr3:33419297:33419400:-	0.38	0.36	0.41	0.65	0.64	0.67	-0.27	1000000000000	UBP1	ENSG00000153560
chr3:37028506:37028594:+@chr3:37030927:37031039:+@chr3:37036805:37036958:+	0.43	0.39	0.48	0.65	0.63	0.68	-0.22	1000000000000	MLH1	ENSG00000076242
chr3:37111287:37111403:-@chr3:37107962:37108033:-@chr3:37100131:37100301:-	0.82	0.79	0.85	0.7	0.68	0.71	0.12	1000000000000	Y_RNA	ENSG00000206645
chr3:38207226:38207334:+@chr3:38209777:38209913:+@chr3:38215217:38215358:+	0.26	0.23	0.29	0.16	0.15	0.17	0.1	1000000000000	OXSR1	ENSG00000172939
chr3:44645570:44646040:+@chr3:44647310:44647442:+@chr3:44647558:44647717:+	0.39	0.32	0.47	0.27	0.23	0.3	0.12	6.32	ZNF197	ENSG00000186448
chr3:47008334:47008440:+@chr3:47008969:47009049:+@chr3:47010431:47010514:+	0.14	0.13	0.16	0.39	0.37	0.4	-0.25	1000000000000	AC094020.2	ENSG00000160796
chr3:47887352:47887599:-@chr3:47883740:47883832:-@chr3:47873925:47874006:-	0.97	0.94	0.98	0.79	0.77	0.82	0.18	1000000000000	MAP4	ENSG00000047849
chr3:49925657:49925796:-@chr3:49923963:49924448:-@chr3:49922556:49923321:-	0.57	0.49	0.65	0.75	0.72	0.77	-0.18	291.44	MON1A	ENSG00000164077
chr3:49987760:49987829:+@chr3:50011877:50011950:+@chr3:50060682:50060756:+	0.83	0.79	0.87	0.7	0.68	0.72	0.13	4.78622e+11	RBM6	ENSG00000004534
chr3:51983021:51983686:-@chr3:51980516:51980948:-@chr3:51978999:51979240:-	0.89	0.87	0.92	0.77	0.76	0.78	0.12	1000000000000	ABHD14B	ENSG00000114779
chr3:52207156:52207311:+@chr3:52207728:52207904:+@chr3:52208266:52208496:+	0.28	0.26	0.3	0.15	0.14	0.16	0.13	1000000000000	ALAS1	ENSG00000023330
chr3:52255751:52255868:+@chr3:52256030:52256284:+@chr3:52256738:52256850:+	0.75	0.71	0.79	0.87	0.85	0.89	-0.12	2.11181e+09	PPM1M	ENSG00000164088
chr3:52827313:52827339:-@chr3:52827108:52827266:-@chr3:52825940:52826114:-	0.75	0.65	0.84	0.6	0.56	0.63	0.15	6.63	ITIH4	ENSG00000055955
chr3:56568637:56568662:+@chr3:56569930:56570080:+@chr3:56572752:56573193:+	0.4	0.33	0.48	0.18	0.16	0.2	0.22	1000000000000	CCDC66	ENSG00000180376
chr3:56760368:56760464:-@chr3:56760124:56760200:-@chr3:56754273:56754530:-	0.62	0.57	0.67	0.74	0.72	0.77	-0.12	1.00535e+06	ARHGEF3	ENSG00000163947
chr3:69129852:69129955:-@chr3:69123663:69123713:-@chr3:69120766:69120858:-	0.09	0.05	0.14	0.2	0.17	0.23	-0.11	68.89	C3orf64	ENSG00000163378
chr3:9845644:9846079:+@chr3:9849788:9849929:+@chr3:9851365:9851591:+	0.23	0.2	0.25	0.36	0.35	0.38	-0.13	1000000000000	TTLL3	ENSG00000214021
chr3:99155926:99156029:-@chr3:99153686:99153786:-@chr3:99152320:99152422:-	0.22	0.19	0.24	0.1	0.09	0.12	0.12	1000000000000	MINA	ENSG00000170854
chr4:106287392:106287585:+@chr4:106330966:106331111:+@chr4:106374503:106383377:+	0.84	0.81	0.86	0.65	0.63	0.66	0.19	1000000000000	TET2	ENSG00000168769
chr4:107401043:107401116:-@chr4:107395553:107395653:-@chr4:107392472:107392613:-	0.21	0.13	0.3	0.09	0.07	0.1	0.12	7	AC004053.1	ENSG00000145348
chr4:124537400:124537537:+@chr4:124538216:124538461:+@chr4:124542142:124544365:+	0.4	0.37	0.42	0.21	0.19	0.23	0.19	1000000000000	SPRY1	ENSG00000164056
chr4:129124944:129125028:+@chr4:129142321:129142365:+@chr4:129149525:129149603:+	0.45	0.37	0.54	0.16	0.12	0.2	0.29	1000000000000	C4orf29	ENSG00000164074
chr4:140212470:140212643:-@chr4:140208288:140208374:-@chr4:140202469:140202661:-	0.93	0.91	0.94	0.83	0.82	0.84	0.1	1000000000000	ELF2	ENSG00000109381
chr4:153675543:153675635:-@chr4:153553082:153553131:-@chr4:153551905:153552474:-	0.31	0.25	0.37	0.21	0.18	0.23	0.1	9.81	FBXW7	ENSG00000109670
chr4:15649667:15649722:-@chr4:15646456:15646482:-@chr4:15644025:15644230:-	0.15	0.13	0.17	0.25	0.2	0.29	-0.1	46.59	PROM1	ENSG00000007062
chr4:156807948:156808021:+@chr4:156808692:156808785:+@chr4:156837358:156837724:+	0.18	0.15	0.21	0.08	0.07	0.08	0.1	1000000000000	GUCY1A3	ENSG00000164116
chr4:159662316:159662627:+@chr4:159684320:159685008:+@chr4:159713300:159713437:+	0.66	0.6	0.72	0.33	0.26	0.4	0.33	1000000000000	RXFP1	ENSG00000171509
chr4:1689677:1690151:-@chr4:1689041:1689200:-@chr4:1687477:1688953:-	0.86	0.81	0.9	0.75	0.73	0.77	0.11	1946.04	TMEM129	ENSG00000168936
chr4:17425574:17425719:+@chr4:17425995:17426079:+@chr4:17427982:17428174:+	0.74	0.68	0.8	0.87	0.83	0.9	-0.13	50.98	HCAP-G	ENSG00000109805
chr4:175653274:175653350:-@chr4:175650877:175651040:-@chr4:175647903:175649820:-	0.96	0.92	0.98	0.85	0.8	0.89	0.11	12342.4	HPGD	ENSG00000164120
chr4:185807543:185807623:-@chr4:185806613:185806779:-@chr4:185796549:185796616:-	0.38	0.33	0.43	0.26	0.25	0.28	0.12	81101.7	CASP3	ENSG00000164305
chr4:185931229:185931302:-@chr4:185928403:185928480:-@chr4:185926464:185926598:-	0.13	0.11	0.16	0.23	0.22	0.25	-0.1	1000000000000	ACSL1	ENSG00000151726
chr4:20315381:20315535:+@chr4:20318524:20318591:+@chr4:20320404:20320494:+	0.96	0.92	0.99	0.86	0.84	0.89	0.1	499.7	PACRGL	ENSG00000163138
chr4:20318524:20318591:+@chr4:20320404:20320494:+@chr4:20323509:20323643:+	0.7	0.62	0.78	0.93	0.9	0.95	-0.23	1.47192e+11	PACRGL	ENSG00000163138
chr4:20324153:20324260:+@chr4:20335529:20335609:+@chr4:20338006:20338118:+	0.36	0.3	0.44	0.55	0.53	0.58	-0.19	3.20596e+07	PACRGL	ENSG00000163138
chr4:2716971:2717060:-@chr4:2716222:2716470:-@chr4:2715912:2716031:-	0.89	0.86	0.92	0.63	0.62	0.65	0.26	1000000000000	TNIP2	ENSG00000168884
chr4:3399615:3399694:+@chr4:3400083:3400236:+@chr4:3401932:3402480:+	0.92	0.84	0.97	0.54	0.49	0.6	0.38	1000000000000	RGS12	ENSG00000159788
chr4:39143300:39143357:+@chr4:39145533:39145661:+@chr4:39148034:39148179:+	0.96	0.89	0.99	0.81	0.78	0.84	0.15	62.92	LIAS	ENSG00000121897
chr4:39775242:39775584:+@chr4:39778051:39778141:+@chr4:39780090:39781233:+	0.21	0.17	0.25	0.05	0.04	0.06	0.16	1000000000000	N4BP2	ENSG00000078177
chr4:42200224:42200288:-@chr4:42182270:42182442:-@chr4:42161667:42161850:-	0.9	0.88	0.93	0.8	0.78	0.83	0.1	1.53631e+09	ATP8A1	ENSG00000124406
chr4:57382381:57382665:-@chr4:57381459:57381502:-@chr4:57370783:57371107:-	0.74	0.67	0.83	0.61	0.59	0.63	0.13	23.18	Y_RNA	ENSG00000206957
chr4:714759:714899:+@chr4:716189:716287:+@chr4:717461:717578:+	0.36	0.31	0.4	0.47	0.45	0.49	-0.11	270.99	PCGF3	ENSG00000185619
chr4:8268738:8268884:+@chr4:8269584:8269794:+@chr4:8270898:8270974:+	0.58	0.54	0.62	0.45	0.44	0.47	0.13	1000000000000	SH3TC1	ENSG00000125089
chr4:8288060:8288182:+@chr4:8288905:8289055:+@chr4:8290101:8290297:+	0.74	0.71	0.77	0.64	0.63	0.66	0.1	3.87623e+08	SH3TC1	ENSG00000125089
chr4:83496973:83497072:-@chr4:83496714:83496860:-@chr4:83495481:83495578:-	0.55	0.54	0.56	0.43	0.42	0.43	0.12	1000000000000	HNRNPD	ENSG00000138668
chr4:84040254:84040400:-@chr4:84038166:84038239:-@chr4:84035869:84035951:-	0.93	0.89	0.97	0.67	0.64	0.7	0.26	1000000000000	AC021105.13-1	ENSG00000203460
chr4:84040254:84040400:-@chr4:84039890:84039914:-@chr4:84038166:84038239:-	0.52	0.48	0.55	0.75	0.74	0.77	-0.23	1000000000000	AC021105.13-1	ENSG00000203460
chr4:89553252:89553441:+@chr4:89557600:89557754:+@chr4:89564035:89564148:+	0.75	0.7	0.8	0.88	0.85	0.91	-0.13	9835.48	HERC6	ENSG00000138642
chr5:102549920:102550039:+@chr5:102550914:102550976:+@chr5:102554442:102554582:+	0.22	0.18	0.26	0.32	0.3	0.34	-0.1	45850.3	HISPPD1	ENSG00000145725
chr5:118600916:118601008:+@chr5:118602583:118602674:+@chr5:118604013:118604065:+	0.55	0.49	0.62	0.72	0.69	0.76	-0.17	3962.79	DMXL1	ENSG00000172869
chr5:124013202:124013289:-@chr5:124010271:124012725:-@chr5:124007836:124008253:-	0.93	0.89	0.97	0.79	0.75	0.84	0.14	548.83	ZNF608	ENSG00000168916
chr5:133937234:133937351:+@chr5:133940357:133940485:+@chr5:133942086:133946817:+	0.49	0.45	0.54	0.61	0.59	0.63	-0.12	6925.79	PHF15	ENSG00000043143
chr5:134724086:134724196:-@chr5:134714412:134714502:-@chr5:134709557:134709646:-	0.89	0.87	0.9	0.71	0.71	0.72	0.18	1000000000000	H2AFY	ENSG00000113648
chr5:135496435:135496550:+@chr5:135511420:135511494:+@chr5:135517180:135517751:+	0.54	0.47	0.6	0.68	0.65	0.71	-0.14	69.32	SMAD5	ENSG00000113658
chr5:137312543:137312772:-@chr5:137309816:137309899:-@chr5:137309490:137309585:-	0.59	0.55	0.63	0.74	0.73	0.76	-0.15	1000000000000	C5orf5	ENSG00000031003
chr5:137384619:137384785:-@chr5:137382543:137382734:-@chr5:137381890:137382102:-	0.34	0.31	0.37	0.49	0.47	0.51	-0.15	1000000000000	C5orf5	ENSG00000031003
chr5:138920935:138921584:+@chr5:138922013:138922176:+@chr5:138960141:138960204:+	0.26	0.23	0.29	0.37	0.36	0.39	-0.11	1000000000000	UBE2D2	ENSG00000131508
chr5:139824436:139824545:+@chr5:139832008:139832064:+@chr5:139842349:139842436:+	0.76	0.72	0.8	0.64	0.63	0.66	0.12	8.84757e+09	ANKHD1	ENSG00000131503
chr5:145597054:145597188:+@chr5:145611467:145611631:+@chr5:145614699:145614848:+	0.88	0.85	0.91	0.78	0.76	0.79	0.1	1.00968e+11	RBM27	ENSG00000091009
chr5:147785278:147785457:+@chr5:147786969:147787478:+@chr5:147793180:147793280:+	0.73	0.68	0.78	0.62	0.61	0.64	0.11	199.91	FBXO38	ENSG00000145868
chr5:147785278:147785457:+@chr5:147786969:147787703:+@chr5:147793180:147793280:+	0.72	0.67	0.76	0.62	0.6	0.64	0.1	19.36	FBXO38	ENSG00000145868
chr5:153398610:153398690:-@chr5:153398046:153398187:-@chr5:153394497:153394720:-	0.25	0.18	0.32	0.13	0.12	0.15	0.12	53.4	FAM114A2	ENSG00000055147
chr5:159452686:159453650:-@chr5:159440236:159440355:-@chr5:159435470:159437753:-	0.67	0.57	0.77	0.42	0.39	0.46	0.25	620.15	PWWP2A	ENSG00000170234
chr5:176329208:176329313:-@chr5:176328162:176328898:-@chr5:176317700:176317761:-	0.85	0.79	0.9	0.58	0.56	0.6	0.27	1000000000000	UIMC1	ENSG00000087206
chr5:176892050:176892248:-@chr5:176891560:176891738:-@chr5:176890889:176891128:-	0.46	0.41	0.5	0.36	0.34	0.37	0.1	122.95	AC145098.2-2	ENSG00000146067
chr5:176892050:176892248:-@chr5:176891560:176891807:-@chr5:176890889:176891128:-	0.58	0.54	0.62	0.43	0.41	0.44	0.15	1000000000000	AC145098.2-2	ENSG00000146067
chr5:177574403:177574492:-@chr5:177572580:177572710:-@chr5:177571497:177571577:-	0.89	0.87	0.91	0.79	0.77	0.8	0.1	1000000000000	AGXT2L2	ENSG00000175309
chr5:177592099:177592392:-@chr5:177591276:177591473:-@chr5:177591012:177591130:-	0.2	0.18	0.23	0.36	0.35	0.38	-0.16	1000000000000	AGXT2L2	ENSG00000175309
chr5:179212984:179213043:-@chr5:179212803:179212882:-@chr5:179207584:179207672:-	0.1	0.05	0.15	0.2	0.17	0.23	-0.1	6.8	C5orf45	ENSG00000161010
chr5:180220134:180220290:-@chr5:180211594:180211666:-@chr5:180207219:180211099:-	0.36	0.28	0.45	0.18	0.15	0.2	0.18	58221.7	AC022413.4-2	ENSG00000214302
chr5:32274864:32275036:-@chr5:32270825:32270992:-@chr5:32262868:32266210:-	0.64	0.58	0.69	0.48	0.45	0.5	0.16	993851	U6	ENSG00000199731
chr5:34950557:34950823:-@chr5:34949332:34949440:-@chr5:34947416:34947674:-	0.61	0.56	0.66	0.5	0.48	0.52	0.11	676.54	RAD1	ENSG00000113456
chr5:56240844:56241327:+@chr5:56242753:56243120:+@chr5:56244595:56244718:+	0.87	0.84	0.91	0.77	0.75	0.78	0.1	5.18166e+07	C5orf35	ENSG00000155542
chr5:56270467:56270601:-@chr5:56269880:56269922:-@chr5:56269162:56269282:-	0.11	0.08	0.14	0.24	0.22	0.26	-0.13	1000000000000	MIER3	ENSG00000155545
chr5:65384990:65386535:+@chr5:65406608:65406814:+@chr5:65407900:65407992:+	0.53	0.5	0.55	0.63	0.61	0.64	-0.1	1000000000000	ERBB2IP	ENSG00000112851
chr5:68702618:68702754:+@chr5:68703617:68703800:+@chr5:68705413:68705670:+	0.89	0.85	0.93	0.77	0.75	0.8	0.12	113496	RAD17	ENSG00000152942
chr5:68949896:68949977:+@chr5:68950634:68950863:+@chr5:68951597:68951648:+	0.28	0.22	0.35	0.11	0.1	0.12	0.17	2.1406e+07	NA	NA
chr5:69402224:69402334:+@chr5:69408104:69408157:+@chr5:69408602:69409174:+	0.43	0.41	0.46	0.29	0.28	0.3	0.14	1000000000000	SMN2	ENSG00000205571
chr5:70277649:70277759:+@chr5:70283524:70283577:+@chr5:70284022:70284594:+	0.74	0.72	0.76	0.54	0.53	0.55	0.2	1000000000000	SMN1	ENSG00000172062
chr5:70621178:70621367:-@chr5:70592394:70592427:-@chr5:70590773:70590928:-	0.11	0.06	0.17	0.26	0.22	0.31	-0.15	126.57	AC145138.2-2	ENSG00000198237
chr5:70935939:70936051:+@chr5:70958223:70958336:+@chr5:70963704:70963768:+	0.46	0.41	0.51	0.71	0.69	0.73	-0.25	1000000000000	MCCC2	ENSG00000131844
chr5:78980196:78980272:+@chr5:78980641:78980769:+@chr5:78988537:78988580:+	0.8	0.75	0.86	0.69	0.66	0.71	0.11	31.94	PAPD4	ENSG00000164329
chr5:80632862:80633144:-@chr5:80576319:80576984:-@chr5:80569140:80570930:-	0.23	0.18	0.29	0.13	0.12	0.15	0.1	26.71	NA	NA
chr5:82843678:82843971:+@chr5:82850924:82853884:+@chr5:82877112:82877225:+	0.32	0.26	0.4	0.21	0.2	0.21	0.11	135.7	CSPG2	ENSG00000038427
chr5:923588:923690:-@chr5:922360:922519:-@chr5:918529:918696:-	0.15	0.12	0.17	0.04	0.04	0.05	0.11	1000000000000	BRD9	ENSG00000028310
chr5:937053:937185:-@chr5:936466:936565:-@chr5:934222:934297:-	0.24	0.2	0.29	0.08	0.07	0.09	0.16	1000000000000	BRD9	ENSG00000028310
chr5:95013597:95013791:+@chr5:95014577:95014674:+@chr5:95015521:95015696:+	0.72	0.65	0.8	0.56	0.5	0.61	0.16	34.97	RFESD	ENSG00000175449
chr5:96101498:96101578:+@chr5:96102205:96102243:+@chr5:96102726:96102818:+	0.32	0.27	0.37	0.67	0.66	0.69	-0.35	1000000000000	CAST	ENSG00000153113
chr5_random:25572:25728:-@chr5_random:17044:17116:-@chr5_random:12669:16549:-	0.36	0.27	0.45	0.2	0.18	0.23	0.16	1592.55	NA	NA
chr6:106870669:106870834:-@chr6:106862932:106863059:-@chr6:106847596:106847674:-	0.94	0.92	0.96	0.84	0.82	0.85	0.1	1000000000000	ATG5	ENSG00000057663
chr6:109803970:109804008:-@chr6:109798307:109798363:-@chr6:109794416:109796913:-	0.68	0.67	0.7	0.84	0.82	0.84	-0.16	1000000000000	CD164	ENSG00000135535
chr6:110607335:110607900:-@chr6:110606494:110606638:-@chr6:110588531:110588628:-	0.76	0.68	0.82	0.92	0.89	0.94	-0.16	26800.4	WASF1	ENSG00000112290
chr6:111899909:111900036:-@chr6:111888196:111888302:-@chr6:111844179:111844368:-	0.08	0.04	0.12	0.19	0.15	0.22	-0.11	74.46	REV3L	ENSG00000009413
chr6:112130781:112130930:-@chr6:112127411:112127566:-@chr6:112124173:112124352:-	0.46	0.43	0.49	0.76	0.75	0.78	-0.3	1000000000000	FYN	ENSG00000010810
[truncated: 269 more rows]

## Sheet: D_Q157RvsWT
	PSI						dPSI
[truncated: 1,854 more rows]

## Sheet: E_Patient_cassette exons
		PSI
[truncated: 913 more rows]

## Sheet: F_Overlap_seq_patients
			dPSI
[truncated: 71 more rows]

## Sheet: G_Primers
Cloning
[truncated: 36 more rows]

## Sheet: H_Mapped_reads
run	aligned_pairs
[truncated: 12 more rows]
